# Supplementary material for: Integrated proteomic and metabolomic analyses of the mitochondrial neurodegenerative disease MELAS
Source: Royal Society of Chemistry journal article supplement (doi:10.1039/d1mo00416f), 2021-12-21
Supplement: d1mo00416f1.pdf [file d1mo00416f1.pdf]

Please use files  
tab to view ESI  
tables.
