# Supplementary material for: Integrated proteomic and metabolomic analyses of the mitochondrial neurodegenerative disease MELAS
Source: Royal Society of Chemistry journal article supplement (doi:10.1039/d1mo00416f), 2021-12-21
Supplement: d1mo00416f2.pdf [file d1mo00416f2.pdf]

## Supporting Information

### Integrated Proteomic and Metabolomic Analyses of the Mitochondrial Neurodegenerative Disease MELAS

Haorong Li<sup>1</sup>, Martine Uittenbogaard<sup>2</sup>, Ryan Navarro<sup>1</sup>, Mustafa Ahmed<sup>1</sup>, Andrea Gropman<sup>3</sup>,  
Anne Chiamarello<sup>2</sup>, Ling Hao<sup>1†</sup>

<sup>1</sup>Department of Chemistry, The George Washington University, Science and Engineering Hall,  
800 22<sup>nd</sup> St., NW, Washington, DC, 20052, USA

<sup>2</sup>Department of Anatomy and Cell Biology, George Washington University School of Medicine  
and Health Sciences, Washington, DC 20037, USA

<sup>3</sup>Division of Neurogenetics and Neurodevelopmental Pediatrics, Children's National Medical  
Center, Washington, DC 20010, USA

† Corresponding author

Ling Hao

Assistant Professor of Chemistry

Tel.: +1 (202) 994-4492

E-mail: [linghao@gwu.edu](mailto:linghao@gwu.edu)

## TABLE OF CONTENTS

- **Figure S1.** Metabolomics principal component analysis for each HPLC-MS mode (RP and HILIC, polar and nonpolar metabolites, positive and negative electrospray ionization).
- **Figure S2.** Metabolomics volcano plots for each HPLC-MS mode.
- **Figure S3.** Example HPLC-MS chromatograms of fibroblast metabolites.
- **Table S1.** Merged protein IDs and quantification results from DDA and DIA datasets.
- **Table S2.** Merged Metabolite IDs and quantification results from all HPLC-MS modes.
- **Table S3.** Joint pathway analysis results.

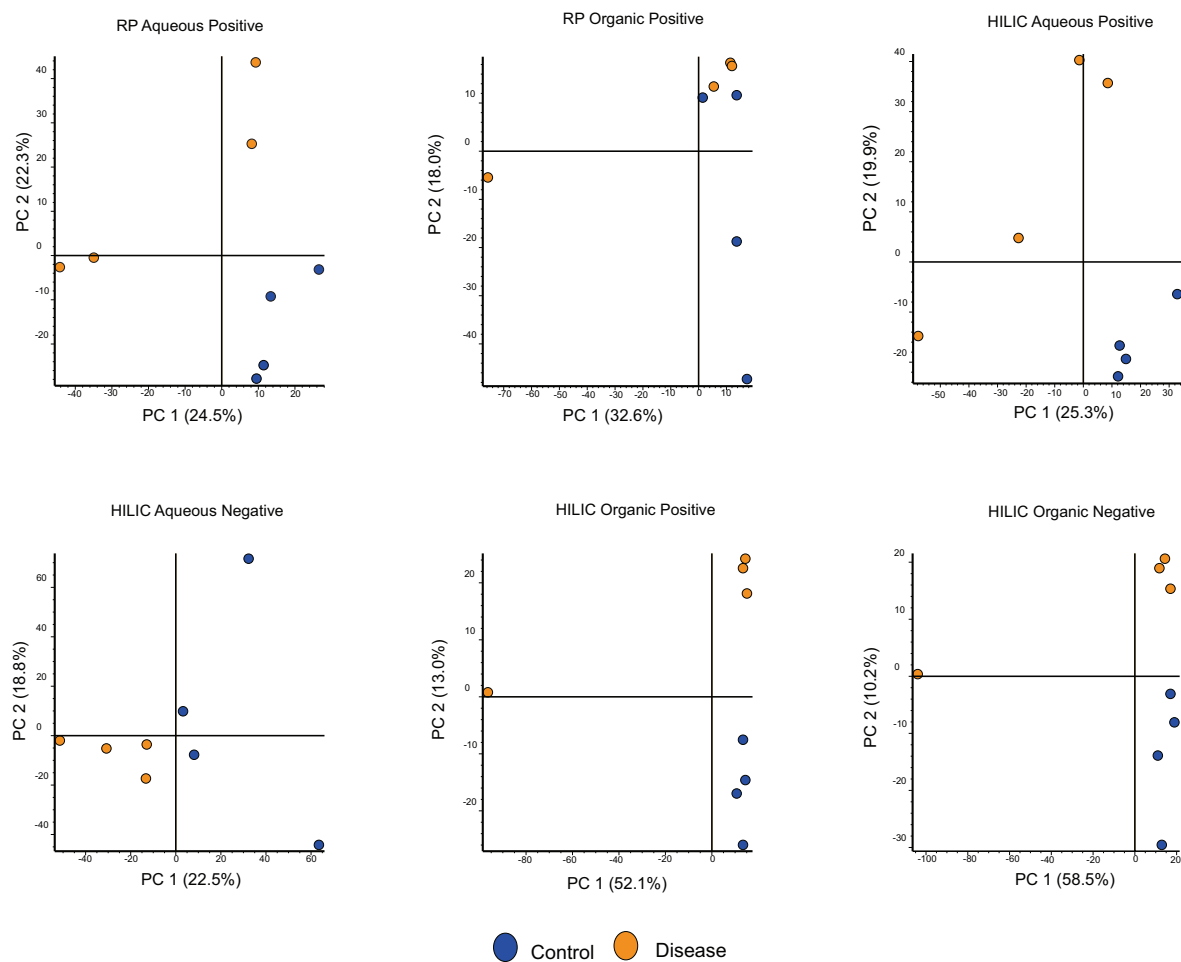

**Figure S1.** Metabolomics principal component analysis for each HPLC-MS mode (RP and HILIC, polar and nonpolar metabolites, positive and negative electrospray ionization).

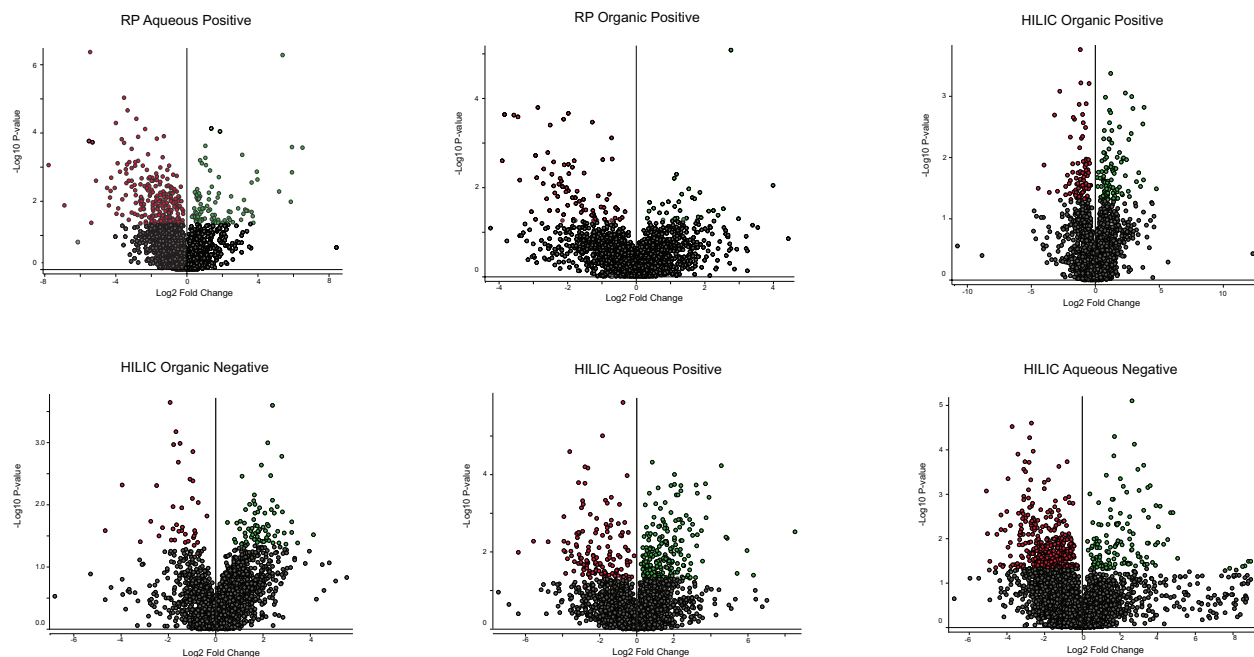

**Figure S2.** Metabolomics volcano plots for each HPLC-MS mode. Aqueous represents the polar fraction from the water/methanol layer, and organic represents the nonpolar fraction from the chloroform layer.

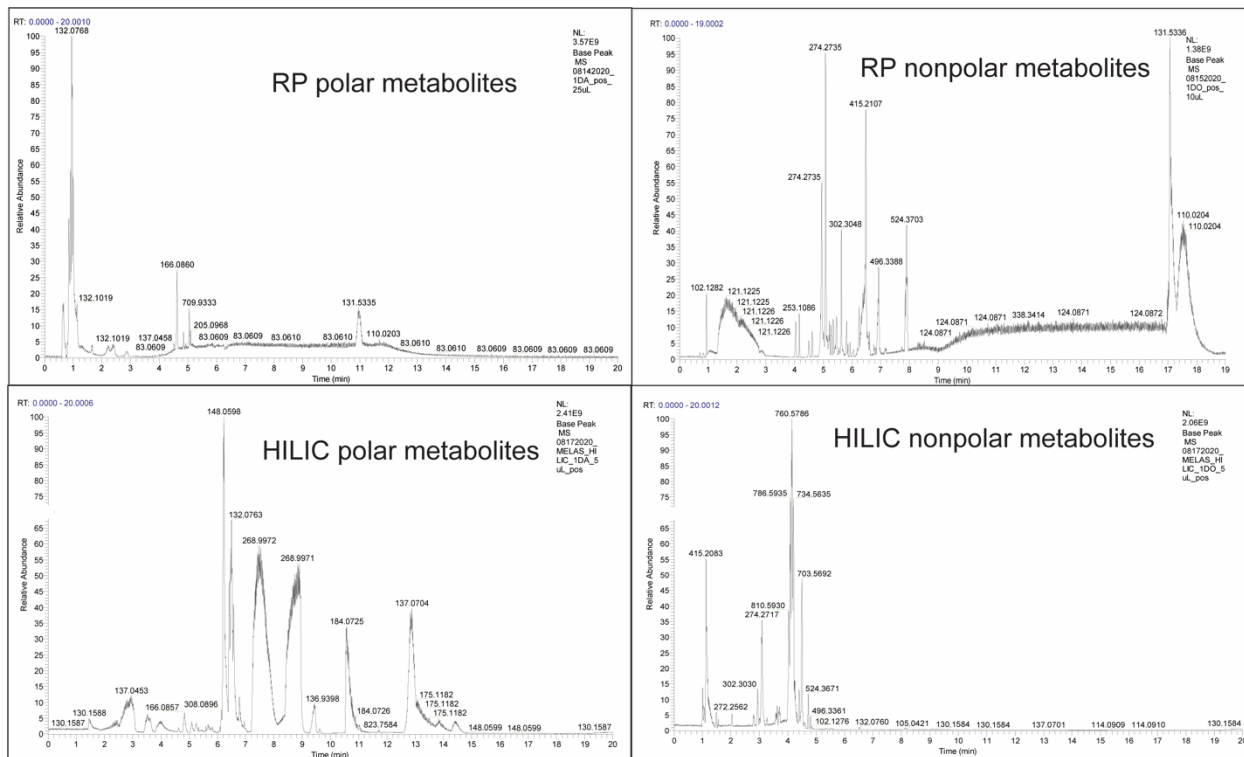

**Figure S3.** Example HPLC-MS chromatograms of fibroblast metabolites.
