# Supplementary material for: Integrated proteomic and metabolomic analyses of the mitochondrial neurodegenerative disease MELAS
Source: Royal Society of Chemistry journal article supplement (doi:10.1039/d1mo00416f), 2021-12-21
Supplement: d1mo00416f3.xlsx [file d1mo00416f3.xlsx]

## Sheet: Table S1_Merged Proteins
Uniprot Accession	DDA_Protein.Description	DDA Gene.Symbol	DDA Peptides #	DDA_Fold.change	DDA_P.Value	DirectDIA_Protein.Descriptions	DIA_gene.symbol	Direct DIA Peptide#	DIA_Fold.Change	DIA_P.value	MaxDIA_Protein.names	MaxDIA_Gene.names	Max DIA peptide #	MaxDIA_Fold.change	MaxDIA_P.Value
Q9NRX3	NADH dehydrogenase [ubiquinone] 1 alpha subcomplex subunit 4-like 2 OS=Homo sapiens OX=9606 GN=NDUFA4L2 PE=3 SV=1	NDUFA4L2	1	500	1e+20	NADH dehydrogenase [ubiquinone] 1 alpha subcomplex subunit 4-like 2	NDUFA4L2		6.4691	0
Q9BU61						NADH dehydrogenase [ubiquinone] 1 alpha subcomplex assembly factor 3	NDUFAF3		1.9192	0.0097
Q330K2						NADH dehydrogenase (ubiquinone) complex I, assembly factor 6	NDUFAF6		1.7528	0.1849
O43181	NADH dehydrogenase [ubiquinone] iron-sulfur protein 4, mitochondrial OS=Homo sapiens OX=9606 GN=NDUFS4 PE=1 SV=1	NDUFS4	1	0.777	0.1917	NADH dehydrogenase [ubiquinone] iron-sulfur protein 4, mitochondrial	NDUFS4		1.2345	0.3515
O75251	NADH dehydrogenase [ubiquinone] iron-sulfur protein 7, mitochondrial OS=Homo sapiens OX=9606 GN=NDUFS7 PE=1 SV=3	NDUFS7	3	0.915	0.3657	NADH dehydrogenase [ubiquinone] iron-sulfur protein 7, mitochondrial	NDUFS7		1.0879	0.607
Q86Y39	NADH dehydrogenase [ubiquinone] 1 alpha subcomplex subunit 11 OS=Homo sapiens OX=9606 GN=NDUFA11 PE=1 SV=3	NDUFA11	3	0.826	0.3334	NADH dehydrogenase [ubiquinone] 1 alpha subcomplex subunit 11	NDUFA11		1.0121	0.9273
O96000	NADH dehydrogenase [ubiquinone] 1 beta subcomplex subunit 10 OS=Homo sapiens OX=9606 GN=NDUFB10 PE=1 SV=3	NDUFB10	3	1.516	0.1646	NADH dehydrogenase [ubiquinone] 1 beta subcomplex subunit 10	NDUFB10		0.9893	0.9486
O95169	NADH dehydrogenase [ubiquinone] 1 beta subcomplex subunit 8, mitochondrial OS=Homo sapiens OX=9606 GN=NDUFB8 PE=1 SV=1	NDUFB8	4	0.207	0.02464	NADH dehydrogenase [ubiquinone] 1 beta subcomplex subunit 8, mitochondrial	NDUFB8	2;2;1;1;1	0.9424	0.6894	NADH dehydrogenase [ubiquinone] 1 beta subcomplex subunit 8, mitochondrial	NDUFB8	2	0.76294	0.0853627
Q9UI09	NADH dehydrogenase [ubiquinone] 1 alpha subcomplex subunit 12 OS=Homo sapiens OX=9606 GN=NDUFA12 PE=1 SV=1	NDUFA12	2	0.711	0.1022	NADH dehydrogenase [ubiquinone] 1 alpha subcomplex subunit 12	NDUFA12		0.9107	0.6108
O75380	NADH dehydrogenase [ubiquinone] iron-sulfur protein 6, mitochondrial OS=Homo sapiens OX=9606 GN=NDUFS6 PE=1 SV=1	NDUFS6	2	0.643		NADH dehydrogenase [ubiquinone] iron-sulfur protein 6, mitochondrial	NDUFS6		0.8535	0.0449
O75306	NADH dehydrogenase [ubiquinone] iron-sulfur protein 2, mitochondrial OS=Homo sapiens OX=9606 GN=NDUFS2 PE=1 SV=2	NDUFS2	6	0.82	0.1372	NADH dehydrogenase [ubiquinone] iron-sulfur protein 2, mitochondrial	NDUFS2	5;5	0.8498	0.1795	NADH dehydrogenase [ubiquinone] iron-sulfur protein 2, mitochondrial	NDUFS2	6	0.831545	0.00669514
P56556	NADH dehydrogenase [ubiquinone] 1 alpha subcomplex subunit 6 OS=Homo sapiens OX=9606 GN=NDUFA6 PE=1 SV=4	NDUFA6	2	0.764	0.3893	NADH dehydrogenase [ubiquinone] 1 alpha subcomplex subunit 6	NDUFA6		0.848	0.2894
O43678	NADH dehydrogenase [ubiquinone] 1 alpha subcomplex subunit 2 OS=Homo sapiens OX=9606 GN=NDUFA2 PE=1 SV=3	NDUFA2	3	0.535	0.02727	NADH dehydrogenase [ubiquinone] 1 alpha subcomplex subunit 2	NDUFA2		0.8422	0.2727
P49821	NADH dehydrogenase [ubiquinone] flavoprotein 1, mitochondrial OS=Homo sapiens OX=9606 GN=NDUFV1 PE=1 SV=4	NDUFV1	14	0.673	0.00235	NADH dehydrogenase [ubiquinone] flavoprotein 1, mitochondrial	NDUFV1		0.8183	0.0725
O75489	NADH dehydrogenase [ubiquinone] iron-sulfur protein 3, mitochondrial OS=Homo sapiens OX=9606 GN=NDUFS3 PE=1 SV=1	NDUFS3	7	0.887	0.2031	NADH dehydrogenase [ubiquinone] iron-sulfur protein 3, mitochondrial	NDUFS3	7;2;2;1;1	0.818	0.0707	NADH dehydrogenase [ubiquinone] iron-sulfur protein 3, mitochondrial	NDUFS3	7	0.85378	0.1848
Q16718	NADH dehydrogenase [ubiquinone] 1 alpha subcomplex subunit 5 OS=Homo sapiens OX=9606 GN=NDUFA5 PE=1 SV=3	NDUFA5	4	0.717	0.04376	NADH dehydrogenase [ubiquinone] 1 alpha subcomplex subunit 5	NDUFA5	4;3;3;3;2;2;1	0.8131	0.0207	NADH dehydrogenase [ubiquinone] 1 alpha subcomplex subunit 5	NDUFA5	4	0.740502	0.0232705
O43674	NADH dehydrogenase [ubiquinone] 1 beta subcomplex subunit 5, mitochondrial OS=Homo sapiens OX=9606 GN=NDUFB5 PE=1 SV=1	NDUFB5	2	0.892	0.3758	NADH dehydrogenase [ubiquinone] 1 beta subcomplex subunit 5, mitochondrial	NDUFB5		0.8065	0.0321
P19404	NADH dehydrogenase [ubiquinone] flavoprotein 2, mitochondrial OS=Homo sapiens OX=9606 GN=NDUFV2 PE=1 SV=2	NDUFV2	5	0.761	0.02204	NADH dehydrogenase [ubiquinone] flavoprotein 2, mitochondrial	NDUFV2		0.7935	0.0231
Q16795	NADH dehydrogenase [ubiquinone] 1 alpha subcomplex subunit 9, mitochondrial OS=Homo sapiens OX=9606 GN=NDUFA9 PE=1 SV=2	NDUFA9	11	0.717	0.02238	NADH dehydrogenase [ubiquinone] 1 alpha subcomplex subunit 9, mitochondrial	NDUFA9	10;9;2;2;1	0.7905	0.0057	NADH dehydrogenase [ubiquinone] 1 alpha subcomplex subunit 9, mitochondrial	NDUFA9	11	0.87629	0.20356
O43920	NADH dehydrogenase [ubiquinone] iron-sulfur protein 5 OS=Homo sapiens OX=9606 GN=NDUFS5 PE=1 SV=3	NDUFS5	3	0.879	0.1834	NADH dehydrogenase [ubiquinone] iron-sulfur protein 5	NDUFS5	3	0.7886	0.0657	NADH dehydrogenase [ubiquinone] iron-sulfur protein 5	NDUFS5	3	0.838409	0.293938
Q9Y6M9	NADH dehydrogenase [ubiquinone] 1 beta subcomplex subunit 9 OS=Homo sapiens OX=9606 GN=NDUFB9 PE=1 SV=3	NDUFB9	5	0.661	0.01188	NADH dehydrogenase [ubiquinone] 1 beta subcomplex subunit 9	NDUFB9		0.7816	0.1881
O43676	NADH dehydrogenase [ubiquinone] 1 beta subcomplex subunit 3 OS=Homo sapiens OX=9606 GN=NDUFB3 PE=1 SV=3	NDUFB3	1	0.603	0.0696	NADH dehydrogenase [ubiquinone] 1 beta subcomplex subunit 3	NDUFB3		0.773	0.1133
Q9NX14						NADH dehydrogenase [ubiquinone] 1 beta subcomplex subunit 11, mitochondrial	NDUFB11		0.761	0.0851
Q8N183	NADH dehydrogenase [ubiquinone] 1 alpha subcomplex assembly factor 2 OS=Homo sapiens OX=9606 GN=NDUFAF2 PE=1 SV=1	NDUFAF2	2	1.04	0.7063	NADH dehydrogenase [ubiquinone] 1 alpha subcomplex assembly factor 2	NDUFAF2		0.7097	0.0091
Q9P032	NADH dehydrogenase [ubiquinone] 1 alpha subcomplex assembly factor 4 OS=Homo sapiens OX=9606 GN=NDUFAF4 PE=1 SV=1	NDUFAF4	3	0.877	0.7731	NADH dehydrogenase [ubiquinone] 1 alpha subcomplex assembly factor 4	NDUFAF4		0.6931	0.0171
O95167	NADH dehydrogenase [ubiquinone] 1 alpha subcomplex subunit 3 OS=Homo sapiens OX=9606 GN=NDUFA3 PE=1 SV=1	NDUFA3	1	0.926	0.4157	NADH dehydrogenase [ubiquinone] 1 alpha subcomplex subunit 3	NDUFA3		0.6636	0.025
P51970	NADH dehydrogenase [ubiquinone] 1 alpha subcomplex subunit 8 OS=Homo sapiens OX=9606 GN=NDUFA8 PE=1 SV=3	NDUFA8	4	0.585	0.1432	NADH dehydrogenase [ubiquinone] 1 alpha subcomplex subunit 8	NDUFA8	3	0.6606	0.0709	NADH dehydrogenase [ubiquinone] 1 alpha subcomplex subunit 8	NDUFA8	4	0.90231	0.525582
P17568						NADH dehydrogenase [ubiquinone] 1 beta subcomplex subunit 7	NDUFB7		0.6564	0.3514
O95299	NADH dehydrogenase [ubiquinone] 1 alpha subcomplex subunit 10, mitochondrial OS=Homo sapiens OX=9606 GN=NDUFA10 PE=1 SV=1	NDUFA10	7	0.749	0.009591	NADH dehydrogenase [ubiquinone] 1 alpha subcomplex subunit 10, mitochondrial	NDUFA10		0.6515	0.0014
Q9P0J0	NADH dehydrogenase [ubiquinone] 1 alpha subcomplex subunit 13 OS=Homo sapiens OX=9606 GN=NDUFA13 PE=1 SV=3	NDUFA13	3	0.707	0.06366	NADH dehydrogenase [ubiquinone] 1 alpha subcomplex subunit 13	NDUFA13	6;6;5;5;5;4;1	0.6409	0.0275	NADH dehydrogenase [ubiquinone] 1 alpha subcomplex subunit 13	NDUFA13	6	0.808785	0.138716
O95168	NADH dehydrogenase [ubiquinone] 1 beta subcomplex subunit 4 OS=Homo sapiens OX=9606 GN=NDUFB4 PE=1 SV=3	NDUFB4	4	0.886	0.2111	NADH dehydrogenase [ubiquinone] 1 beta subcomplex subunit 4	NDUFB4		0.6227	0.1633
O00217	NADH dehydrogenase [ubiquinone] iron-sulfur protein 8, mitochondrial OS=Homo sapiens OX=9606 GN=NDUFS8 PE=1 SV=1	NDUFS8	3	1.02	0.9806	NADH dehydrogenase [ubiquinone] iron-sulfur protein 8, mitochondrial	NDUFS8		0.6128	0.0123
Q9Y314	Nitric oxide synthase-interacting protein OS=Homo sapiens OX=9606 GN=NOSIP PE=1 SV=1	NOSIP	3	1.516	0.02293	Nitric oxide synthase-interacting protein	NOSIP		1.2236	0.0598
P29474	Nitric oxide synthase, endothelial OS=Homo sapiens OX=9606 GN=NOS3 PE=1 SV=4	NOS	1	1.061	0.8066
P12277	Creatine kinase B-type OS=Homo sapiens OX=9606 GN=CKB PE=1 SV=1	CKB	8	0.351	0.004838	Creatine kinase B-type	CKB	6;3;2;2	0.4575	0.022	Creatine kinase B-type	CKB	6	0.432381	0.0265593
Q8TD30	Alanine aminotransferase 2 OS=Homo sapiens OX=9606 GN=GPT2 PE=1 SV=1	GPT2	6	1.233	0.3197	Alanine aminotransferase 2	GPT2	5;4;1;1	1.7175	0.0124	Alanine aminotransferase 2	GPT2	5	1.3975	0.0594109
P15104	Glutamine synthetase OS=Homo sapiens OX=9606 GN=GLUL PE=1 SV=4	GLUL	7	1.171	0.06917	Glutamine synthetase	GLUL		1.1144	0.2213
O94925	Glutaminase kidney isoform, mitochondrial OS=Homo sapiens OX=9606 GN=GLS PE=1 SV=1	GLS	20	1.014	0.8435	Glutaminase kidney isoform, mitochondrial	GLS	12;3	1.0301	0.6673	Glutaminase kidney isoform, mitochondrial	GLS	12	0.998126	0.981316
P04424	Argininosuccinate lyase OS=Homo sapiens OX=9606 GN=ASL PE=1 SV=4	ASL	9	1.019	0.8335	Argininosuccinate lyase	ASL	5;5;4;2	0.9599	0.4481	Argininosuccinate lyase	ASL	5	1.05055	0.711902
P17174	Aspartate aminotransferase, cytoplasmic OS=Homo sapiens OX=9606 GN=GOT1 PE=1 SV=3	GOT1	17	0.87	0.05227	Aspartate aminotransferase, cytoplasmic	GOT1	10;9	0.941	0.2576	Aspartate aminotransferase, cytoplasmic	GOT1	10	1.01373	0.931201
P00505	Aspartate aminotransferase, mitochondrial OS=Homo sapiens OX=9606 GN=GOT2 PE=1 SV=3	GOT2	11	0.691	0.0001271	Aspartate aminotransferase, mitochondrial	GOT2	6;4	0.8932	0.0097	Aspartate aminotransferase, mitochondrial	GOT2	7	0.894833	0.113312
P00367	Glutamate dehydrogenase 1, mitochondrial OS=Homo sapiens OX=9606 GN=GLUD1 PE=1 SV=2	GLUD1	16	0.844	0.1077	Glutamate dehydrogenase 1, mitochondrial	GLUD1	11;9;8;7	0.717	0.0088	Glutamate dehydrogenase 1, mitochondrial;Glutamate dehydrogenase 2, mitochondrial	GLUD1;GLUD2	11	0.837145	0.0686574
P00966	Argininosuccinate synthase OS=Homo sapiens OX=9606 GN=ASS1 PE=1 SV=2	ASS1	14	0.472	0.0006909	Argininosuccinate synthase	ASS1	7;4;3	0.5196	0.0322	Argininosuccinate synthase	ASS1	8	0.546961	0.0108393
P01116	GTPase KRas OS=Homo sapiens OX=9606 GN=KRAS PE=1 SV=1	KRAS	6	1.392	0.1913	GTPase KRas	KRAS		1.1998	0.0946
Q14344	Guanine nucleotide-binding protein subunit alpha-13 OS=Homo sapiens OX=9606 GN=GNA13 PE=1 SV=2	GNA13	7	1.763	0.008374	Guanine nucleotide-binding protein subunit alpha-13	GNA13	7;6	1.1896	0.0582	Guanine nucleotide-binding protein subunit alpha-13	GNA13	7	1.19763	0.200974
Q02750	Dual specificity mitogen-activated protein kinase kinase 1 OS=Homo sapiens OX=9606 GN=MAP2K1 PE=1 SV=2	MAP2K1	10	1.209	0.008159	Dual specificity mitogen-activated protein kinase kinase 1	MAP2K1	4;4;1	1.1378	0.0271	Dual specificity mitogen-activated protein kinase kinase 1	MAP2K1	4	1.24695	0.141932
P07339	Cathepsin D OS=Homo sapiens OX=9606 GN=CTSD PE=1 SV=1	CTSD	12	0.727	0.001167	Cathepsin D	CTSD		0.7405	0.0062
P27361	Mitogen-activated protein kinase 3 OS=Homo sapiens OX=9606 GN=MAPK3 PE=1 SV=4	MAPK3	10	0.579	0.0004472	Mitogen-activated protein kinase 3	MAPK3	7;7;6;6;6;5;3;3;1;1	0.6454	0.0023	Mitogen-activated protein kinase 3;Mitogen-activated protein kinase	MAPK3	7	0.70171	0.105226
P15153	Ras-related C3 botulinum toxin substrate 2 OS=Homo sapiens OX=9606 GN=RAC2 PE=1 SV=1	RAC2	7	0.798	0.06483	Ras-related C3 botulinum toxin substrate 2	RAC2		0.5412	0.011
P63096	Guanine nucleotide-binding protein G(i) subunit alpha-1 OS=Homo sapiens OX=9606 GN=GNAI1 PE=1 SV=2	GNAI1	9	2.273	0.01092	Guanine nucleotide-binding protein G(i) subunit alpha-1	GNAI1		0.0936	0.0849
P11766	Alcohol dehydrogenase class-3 OS=Homo sapiens OX=9606 GN=ADH5 PE=1 SV=4	ADH5	8	2.042	5.116e-05	Alcohol dehydrogenase class-3	ADH5	6;4;2;1;1	2.5189	0.0009	Alcohol dehydrogenase class-3	ADH5	8	2.48008	0.00393739
P09972	Fructose-bisphosphate aldolase C OS=Homo sapiens OX=9606 GN=ALDOC PE=1 SV=2	ALDOC	18	1.016	0.7914	Fructose-bisphosphate aldolase C	ALDOC		1.4183	0.0007
P07195	L-lactate dehydrogenase B chain OS=Homo sapiens OX=9606 GN=LDHB PE=1 SV=2	LDHB	12	1.054	0.1616	L-lactate dehydrogenase B chain	LDHB	8;6;5;4;3	1.0794	0.0303	L-lactate dehydrogenase B chain;L-lactate dehydrogenase	LDHB	8	1.14237	0.175953
P09104	Gamma-enolase OS=Homo sapiens OX=9606 GN=ENO2 PE=1 SV=3	ENO2	14	0.428	0.002099	Gamma-enolase	ENO2	7;6;6;3;1	0.7687	0.008	Gamma-enolase;Enolase	ENO2	7	0.617875	0.0402337
P18669	Phosphoglycerate mutase 1 OS=Homo sapiens OX=9606 GN=PGAM1 PE=1 SV=2	PGAM1; LOC643576	10	0.532	0.07577	Phosphoglycerate mutase 1	PGAM1	6;3;2	0.5308	0.063	Phosphoglycerate mutase 1;Probable phosphoglycerate mutase 4	PGAM1;PGAM4	7	0.588516	0.182399
O14556	Glyceraldehyde-3-phosphate dehydrogenase, testis-specific OS=Homo sapiens OX=9606 GN=GAPDHS PE=1 SV=2	GAPDHS	1	0.661	0.578			1			Glyceraldehyde-3-phosphate dehydrogenase, testis-specific	GAPDHS	1	0.91412	0.622256
P07864	L-lactate dehydrogenase C chain OS=Homo sapiens OX=9606 GN=LDHC PE=1 SV=4	LDHC	1	0.657	0.6397
Q6ZMR3	L-lactate dehydrogenase A-like 6A OS=Homo sapiens OX=9606 GN=LDHAL6A PE=2 SV=1	LDHAL6A	1	0.657	0.6397
P15259	Phosphoglycerate mutase 2 OS=Homo sapiens OX=9606 GN=PGAM2 PE=1 SV=3	PGAM2	3	0.538	0.132
P43304	Glycerol-3-phosphate dehydrogenase, mitochondrial OS=Homo sapiens OX=9606 GN=GPD2 PE=1 SV=3	GPD2	13	1.511	0.005885	Glycerol-3-phosphate dehydrogenase, mitochondrial	GPD2	11;11;4	1.6855	0.0008	Glycerol-3-phosphate dehydrogenase, mitochondrial	GPD2	11	1.8798	0.00377035
Q6UWP7	Lysocardiolipin acyltransferase 1 OS=Homo sapiens OX=9606 GN=LCLAT1 PE=1 SV=1	LCLAT1	7	1.547	0.00433	Lysocardiolipin acyltransferase 1	LCLAT1	5;5;2;2;1;1;1;1;1;1	1.9304	0.0062	Lysocardiolipin acyltransferase 1	LCLAT1	5	2.16963	0.0276631
O14495	Phospholipid phosphatase 3 OS=Homo sapiens OX=9606 GN=PLPP3 PE=1 SV=1	PPAP2B; PLPP3	6	1.925	0.0001416	Phospholipid phosphatase 3	PLPP3	3;2;2;2	1.9252	0.0001	Lipid phosphate phosphohydrolase 3	PPAP2B	3	1.97235	0.0027655
Q6ZWT7	Lysophospholipid acyltransferase 2 OS=Homo sapiens OX=9606 GN=MBOAT2 PE=1 SV=2	MBOAT2	2	1.882		Lysophospholipid acyltransferase 2	MBOAT2		1.4471	0.1581
P15121	Aldo-keto reductase family 1 member B1 OS=Homo sapiens OX=9606 GN=AKR1B1 PE=1 SV=3	AKR1B1	6	0.136	0.03244	Aldo-keto reductase family 1 member B1	AKR1B1		0.6568	0.2353
P07203	Glutathione peroxidase 1 OS=Homo sapiens OX=9606 GN=GPX1 PE=1 SV=4	GPX1	7	0.638	8.144e-06	Glutathione peroxidase 1	GPX1		0.8431	0.003
P36269	Glutathione hydrolase 5 proenzyme OS=Homo sapiens OX=9606 GN=GGT5 PE=1 SV=2	GGT5	1	0.002	1e+20			2;1;1			Gamma-glutamyltransferase 5;Gamma-glutamyltransferase 5 heavy chain;Gamma-glutamyltransferase 5 light chain	GGT5	2
P10620	Microsomal glutathione S-transferase 1 OS=Homo sapiens OX=9606 GN=MGST1 PE=1 SV=1	MGST1	2	1.293	0.04997	Microsomal glutathione S-transferase 1	MGST1	2;1;1;1;1	1.4412	0.0574	Microsomal glutathione S-transferase 1	MGST1	2	1.43671	0.00851737
Q99735	Microsomal glutathione S-transferase 2 OS=Homo sapiens OX=9606 GN=MGST2 PE=1 SV=1	MGST2	1	2.048	0.02163	Microsomal glutathione S-transferase 2	MGST2		2.4487	0.0119
Q96SL4	Glutathione peroxidase 7 OS=Homo sapiens OX=9606 GN=GPX7 PE=1 SV=1	GPX7	5	0.499	0.0005892	Glutathione peroxidase 7	GPX7	2	0.6771	0.0557	Glutathione peroxidase 7	GPX7	2	0.534609	0.00871024
P28161	Glutathione S-transferase Mu 2 OS=Homo sapiens OX=9606 GN=GSTM2 PE=1 SV=2	GSTM2	7	0.557	0.0002695	Glutathione S-transferase Mu 2	GSTM2		0.6479	0.0395
P21266	Glutathione S-transferase Mu 3 OS=Homo sapiens OX=9606 GN=GSTM3 PE=1 SV=3	GSTM3	10	0.44	0.0005553	Glutathione S-transferase Mu 3	GSTM3	6;5	0.5583	0.0003	Glutathione S-transferase Mu 3	GSTM3	6	0.482556	0.00129271
P09488	Glutathione S-transferase Mu 1 OS=Homo sapiens OX=9606 GN=GSTM1 PE=1 SV=3	GSTM1	4	0.429	0.00326
Q03013	Glutathione S-transferase Mu 4 OS=Homo sapiens OX=9606 GN=GSTM4 PE=1 SV=3	GSTM4	4	0.429	0.00326
P00846	ATP synthase subunit a OS=Homo sapiens OX=9606 GN=MT-ATP6 PE=1 SV=1	ATP6	1	1.153	0.51	ATP synthase subunit a	MT-ATP6		2.7681	0.0039
P56385	ATP synthase subunit e, mitochondrial OS=Homo sapiens OX=9606 GN=ATP5ME PE=1 SV=2	ATP5I	1	1.289	0.04994	ATP synthase subunit e, mitochondrial	ATP5ME	3	1.7309	0.0486	ATP synthase subunit e, mitochondrial	ATP5I	3	1.4233	0.19364
Q96IX5						ATP synthase membrane subunit DAPIT, mitochondrial	ATP5MD		1.5351	0.1632
P25705	ATP synthase subunit alpha, mitochondrial OS=Homo sapiens OX=9606 GN=ATP5F1A PE=1 SV=1	ATP5A1	20	1.179	0.02484	ATP synthase subunit alpha, mitochondrial	ATP5F1A	15;14;13;9;8;6;6;4;2	1.3349	0.0092	ATP synthase subunit alpha, mitochondrial	ATP5A1	16	1.44908	0.00164453
O75964	ATP synthase subunit g, mitochondrial OS=Homo sapiens OX=9606 GN=ATP5MG PE=1 SV=3	ATP5L	3	1.212	0.07392	ATP synthase subunit g, mitochondrial	ATP5MG		1.2455	0.0198
P56134	ATP synthase subunit f, mitochondrial OS=Homo sapiens OX=9606 GN=ATP5MF PE=1 SV=3	ATP5J2	2	1.162	0.2252	ATP synthase subunit f, mitochondrial	ATP5MF		1.1987	0.0148
P48047	ATP synthase subunit O, mitochondrial OS=Homo sapiens OX=9606 GN=ATP5PO PE=1 SV=1	ATP5O	9	1.259	0.2474	ATP synthase subunit O, mitochondrial	ATP5PO	7;4;4;2;1	1.1819	0.0232	ATP synthase subunit O, mitochondrial	ATP5O	7	1.27586	0.199953
P06576	ATP synthase subunit beta, mitochondrial OS=Homo sapiens OX=9606 GN=ATP5F1B PE=1 SV=3	ATP5B	24	1.184	0.02675	ATP synthase subunit beta, mitochondrial	ATP5F1B	17;14;9;6	1.1585	0.0473	ATP synthase subunit beta, mitochondrial;ATP synthase subunit beta	ATP5B	17	1.26058	0.060579
P36542	ATP synthase subunit gamma, mitochondrial OS=Homo sapiens OX=9606 GN=ATP5F1C PE=1 SV=1	ATP5C1	8	1.126	0.326	ATP synthase subunit gamma, mitochondrial	ATP5F1C	3;3	1.1008	0.4574	ATP synthase subunit gamma, mitochondrial	ATP5C1	3	1.33267	0.238007
Q8N5M1						ATP synthase mitochondrial F1 complex assembly factor 2	ATPAF2		1.0897	0.8367
P24539	ATP synthase F(0) complex subunit B1, mitochondrial OS=Homo sapiens OX=9606 GN=ATP5PB PE=1 SV=2	ATP5F1	5	1.246	0.09122	ATP synthase F(0) complex subunit B1, mitochondrial	ATP5PB	5;4	1.076	0.7286	ATP synthase F(0) complex subunit B1, mitochondrial	ATP5F1	5	1.11133	0.280225
O75947	ATP synthase subunit d, mitochondrial OS=Homo sapiens OX=9606 GN=ATP5PD PE=1 SV=3	ATP5H	6	1.025	0.8213	ATP synthase subunit d, mitochondrial	ATP5PD	5;5;3	0.9964	0.9657	ATP synthase subunit d, mitochondrial	ATP5H	5	1.08408	0.66229
Q5TC12	ATP synthase mitochondrial F1 complex assembly factor 1 OS=Homo sapiens OX=9606 GN=ATPAF1 PE=1 SV=1	ATPAF1	1	0.961	0.8811	ATP synthase mitochondrial F1 complex assembly factor 1	ATPAF1		0.8251	0.4053
P30049	ATP synthase subunit delta, mitochondrial OS=Homo sapiens OX=9606 GN=ATP5F1D PE=1 SV=2	ATP5D	1	1.262	0.08247	ATP synthase subunit delta, mitochondrial	ATP5F1D		0.8217	0.7591
P18859	ATP synthase-coupling factor 6, mitochondrial OS=Homo sapiens OX=9606 GN=ATP5PF PE=1 SV=1	ATP5J	2	0.995	0.9708	ATP synthase-coupling factor 6, mitochondrial	ATP5PF		0.664	0.3842
P14406	Cytochrome c oxidase subunit 7A2, mitochondrial OS=Homo sapiens OX=9606 GN=COX7A2 PE=1 SV=1	COX7A2	2	0.831	0.2011	Cytochrome c oxidase subunit 7A2, mitochondrial	COX7A2		1.7145	0.1587
Q9Y2R0	Cytochrome c oxidase assembly factor 3 homolog, mitochondrial OS=Homo sapiens OX=9606 GN=COA3 PE=1 SV=1	COA3	1	0.946	0.7488	Cytochrome c oxidase assembly factor 3 homolog, mitochondrial	COA3		1.0398	0.8071
Q14061						Cytochrome c oxidase copper chaperone	COX17		0.9926	0.9829
P10606	Cytochrome c oxidase subunit 5B, mitochondrial OS=Homo sapiens OX=9606 GN=COX5B PE=1 SV=2	COX5B	3	0.817	0.0589	Cytochrome c oxidase subunit 5B, mitochondrial	COX5B	2	0.99	0.8957	Cytochrome c oxidase subunit 5B, mitochondrial	COX5B	2	0.899427	0.34897
Q9BSH4	Translational activator of cytochrome c oxidase 1 OS=Homo sapiens OX=9606 GN=TACO1 PE=1 SV=1	TACO1	2	0.662	0.05037	Translational activator of cytochrome c oxidase 1	TACO1		0.9388	0.8476
O00483	Cytochrome c oxidase subunit NDUFA4 OS=Homo sapiens OX=9606 GN=NDUFA4 PE=1 SV=1	NDUFA4	2	0.78	0.01438	Cytochrome c oxidase subunit NDUFA4	NDUFA4	2	0.856	0.3021	Cytochrome c oxidase subunit NDUFA4	NDUFA4	2	0.797809	0.0462791
Q5RI15	Cytochrome c oxidase assembly protein COX20, mitochondrial OS=Homo sapiens OX=9606 GN=COX20 PE=1 SV=2	COX20	2	0.944	0.5446	Cytochrome c oxidase assembly protein COX20, mitochondrial	COX20	2;2	0.774	0.0946	Cytochrome c oxidase protein 20 homolog	COX20	2	0.891971	0.293135
P20674	Cytochrome c oxidase subunit 5A, mitochondrial OS=Homo sapiens OX=9606 GN=COX5A PE=1 SV=2	COX5A	5	0.801	0.02001	Cytochrome c oxidase subunit 5A, mitochondrial	COX5A		0.7719	0.0044
P00403	Cytochrome c oxidase subunit 2 OS=Homo sapiens OX=9606 GN=MT-CO2 PE=1 SV=1	COX2	2	0.893	0.276	Cytochrome c oxidase subunit 2	MT-CO2		0.6956	0.0566
P13073	Cytochrome c oxidase subunit 4 isoform 1, mitochondrial OS=Homo sapiens OX=9606 GN=COX4I1 PE=1 SV=1	COX4I1	4	0.734	0.06888	Cytochrome c oxidase subunit 4 isoform 1, mitochondrial	COX4I1	2;1;1;1;1;1	0.6947	0.0356	Cytochrome c oxidase subunit 4 isoform 1, mitochondrial	COX4I1	2	0.844476	0.602608
P14854	Cytochrome c oxidase subunit 6B1 OS=Homo sapiens OX=9606 GN=COX6B1 PE=1 SV=2	COX6B1	3	0.633	0.00635	Cytochrome c oxidase subunit 6B1	COX6B1		0.6481	0.0149
P12074	Cytochrome c oxidase subunit 6A1, mitochondrial OS=Homo sapiens OX=9606 GN=COX6A1 PE=1 SV=4	COX6A1	1	0.869	0.6714	Cytochrome c oxidase subunit 6A1, mitochondrial	COX6A1	2;1	0.6058	0.0818	Cytochrome c oxidase subunit 6A1, mitochondrial	COX6A1	2	0.598031	0.155128
O14548	Cytochrome c oxidase subunit 7A-related protein, mitochondrial OS=Homo sapiens OX=9606 GN=COX7A2L PE=1 SV=2	COX7A2L	2	0.852	0.01208	Cytochrome c oxidase subunit 7A-related protein, mitochondrial	COX7A2L		0.5982	0.0351
Q5JTJ3						Cytochrome c oxidase assembly factor 6 homolog	COA6		0.5776	0.1193
P24310	Cytochrome c oxidase subunit 7A1, mitochondrial OS=Homo sapiens OX=9606 GN=COX7A1 PE=1 SV=2	COX7A1	1	0.944	0.7007	Cytochrome c oxidase subunit 7A1, mitochondrial	COX7A1		0.5224	0.1412
P15954	Cytochrome c oxidase subunit 7C, mitochondrial OS=Homo sapiens OX=9606 GN=COX7C PE=1 SV=1	COX7C	1	0.826	0.4073
P09669	Cytochrome c oxidase subunit 6C OS=Homo sapiens OX=9606 GN=COX6C PE=1 SV=2	COX6C	2	0.738	0.03261
O14949	Cytochrome b-c1 complex subunit 8 OS=Homo sapiens OX=9606 GN=UQCRQ PE=1 SV=4	UQCRQ	1	1.236	0.2642	Cytochrome b-c1 complex subunit 8	UQCRQ		1.3669	0.3445
Q9UDW1	Cytochrome b-c1 complex subunit 9 OS=Homo sapiens OX=9606 GN=UQCR10 PE=1 SV=3	UQCR10	1	0.977	0.9057	Cytochrome b-c1 complex subunit 9	UQCR10		1.0505	0.7646
P31930	Cytochrome b-c1 complex subunit 1, mitochondrial OS=Homo sapiens OX=9606 GN=UQCRC1 PE=1 SV=3	UQCRC1	13	0.909	0.3734	Cytochrome b-c1 complex subunit 1, mitochondrial	UQCRC1	9	1.0117	0.7933	Cytochrome b-c1 complex subunit 1, mitochondrial	UQCRC1	9	0.940441	0.281296
P47985	Cytochrome b-c1 complex subunit Rieske, mitochondrial OS=Homo sapiens OX=9606 GN=UQCRFS1 PE=1 SV=2	UQCRFS1	6	1.013	0.8726	Cytochrome b-c1 complex subunit Rieske, mitochondrial	UQCRFS1		0.9779	0.7663
P22695	Cytochrome b-c1 complex subunit 2, mitochondrial OS=Homo sapiens OX=9606 GN=UQCRC2 PE=1 SV=3	UQCRC2	11	0.927	0.3053	Cytochrome b-c1 complex subunit 2, mitochondrial	UQCRC2		0.9464	0.3503
P07919						Cytochrome b-c1 complex subunit 6, mitochondrial	UQCRH		0.7787	0.7111
P14927	Cytochrome b-c1 complex subunit 7 OS=Homo sapiens OX=9606 GN=UQCRB PE=1 SV=2	UQCRB	5	0.881	0.2769	Cytochrome b-c1 complex subunit 7	UQCRB		0.7344	0.0995
P21912	Succinate dehydrogenase [ubiquinone] iron-sulfur subunit, mitochondrial OS=Homo sapiens OX=9606 GN=SDHB PE=1 SV=3	SDHB	6	1.012	0.901	Succinate dehydrogenase [ubiquinone] iron-sulfur subunit, mitochondrial	SDHB	6;4;4	1.0271	0.7241	Succinate dehydrogenase [ubiquinone] iron-sulfur subunit, mitochondrial	SDHB	6	1.10945	0.409272
P31040	Succinate dehydrogenase [ubiquinone] flavoprotein subunit, mitochondrial OS=Homo sapiens OX=9606 GN=SDHA PE=1 SV=2	SDHA	15	1.065	0.612	Succinate dehydrogenase [ubiquinone] flavoprotein subunit, mitochondrial	SDHA		1.0258	0.7985
Q99643						Succinate dehydrogenase cytochrome b560 subunit, mitochondrial	SDHC		0.7705	0.1792
O95298	NADH dehydrogenase [ubiquinone] 1 subunit C2 OS=Homo sapiens OX=9606 GN=NDUFC2 PE=1 SV=1	NDUFC2; NDUFC2-KCTD14	2	0.809	0.1722
O95182	NADH dehydrogenase [ubiquinone] 1 alpha subcomplex subunit 7 OS=Homo sapiens OX=9606 GN=NDUFA7 PE=1 SV=3	NDUFA7	2	0.78	0.2401
P24298	Alanine aminotransferase 1 OS=Homo sapiens OX=9606 GN=GPT PE=1 SV=3	GPT	1	1.036	0.8491
P49448	Glutamate dehydrogenase 2, mitochondrial OS=Homo sapiens OX=9606 GN=GLUD2 PE=1 SV=2	GLUD2	11	0.853	0.2105
Q9UI32	Glutaminase liver isoform, mitochondrial OS=Homo sapiens OX=9606 GN=GLS2 PE=1 SV=2	GLS2	1	0.841	0.4636
P31327	Carbamoyl-phosphate synthase [ammonia], mitochondrial OS=Homo sapiens OX=9606 GN=CPS1 PE=1 SV=2	CPS1	2	0.752	0.1281
P08237	ATP-dependent 6-phosphofructokinase, muscle type OS=Homo sapiens OX=9606 GN=PFKM PE=1 SV=2	PFKM	9	1.307	0.09662	ATP-dependent 6-phosphofructokinase, muscle type	PFKM		1.401	0.001
Q01813	ATP-dependent 6-phosphofructokinase, platelet type OS=Homo sapiens OX=9606 GN=PFKP PE=1 SV=2	PFKP	24	1.239	0.0008884	ATP-dependent 6-phosphofructokinase, platelet type	PFKP	14;12;9;3;3;2;2;1	1.3934	0.004	ATP-dependent 6-phosphofructokinase, platelet type	PFKP	14	1.32038	0.0260876
P30837	Aldehyde dehydrogenase X, mitochondrial OS=Homo sapiens OX=9606 GN=ALDH1B1 PE=1 SV=3	ALDH1B1	15	1.21	0.01433	Aldehyde dehydrogenase X, mitochondrial	ALDH1B1	8;1	1.262	0.0006	Aldehyde dehydrogenase X, mitochondrial	ALDH1B1	8	1.24558	0.0660408
Q9NR19	Acetyl-coenzyme A synthetase, cytoplasmic OS=Homo sapiens OX=9606 GN=ACSS2 PE=1 SV=1	ACSS2	2	1.201	0.2387	Acetyl-coenzyme A synthetase, cytoplasmic	ACSS2	2;2;1;1;1;1;1;1	1.2233	0.0146	Acetyl-coenzyme A synthetase, cytoplasmic	ACSS2	2	1.17395	0.231409
Q2TB90	Hexokinase HKDC1 OS=Homo sapiens OX=9606 GN=HKDC1 PE=1 SV=3	HKDC1	4	1.46	0.06772	Hexokinase HKDC1	HKDC1		1.2079	0.434
P00558	Phosphoglycerate kinase 1 OS=Homo sapiens OX=9606 GN=PGK1 PE=1 SV=3	PGK1	22	1.124	0.01129	Phosphoglycerate kinase 1	PGK1	16;15	1.199	0.032	Phosphoglycerate kinase 1	PGK1	17	1.25879	0.0351852
P17858	ATP-dependent 6-phosphofructokinase, liver type OS=Homo sapiens OX=9606 GN=PFKL PE=1 SV=6	PFKL	20	1.018	0.7837	ATP-dependent 6-phosphofructokinase, liver type	PFKL	14;13	1.1303	0.1489	ATP-dependent 6-phosphofructokinase, liver type	PFKL	14	1.19838	0.224641
P06733	Alpha-enolase OS=Homo sapiens OX=9606 GN=ENO1 PE=1 SV=2	ENO1	32	1.041	0.3192	Alpha-enolase	ENO1	20;19;14;8;7;7;4;3;3;2;2;2;2;2;2	1.1032	0.1325	Alpha-enolase	ENO1	20	1.13945	0.130257
P08559	Pyruvate dehydrogenase E1 component subunit alpha, somatic form, mitochondrial OS=Homo sapiens OX=9606 GN=PDHA1 PE=1 SV=3	PDHA1	10	0.892	0.05865	Pyruvate dehydrogenase E1 component subunit alpha, somatic form, mitochondrial	PDHA1	5;5;5;5;2;2;2;1	1.0443	0.3541	Pyruvate dehydrogenase E1 component subunit alpha, somatic form, mitochondrial	PDHA1	5	0.991397	0.950942
P04406	Glyceraldehyde-3-phosphate dehydrogenase OS=Homo sapiens OX=9606 GN=GAPDH PE=1 SV=3	GAPDH	21	0.949	0.2618	Glyceraldehyde-3-phosphate dehydrogenase	GAPDH	14;14;11	1.0412	0.7235	Glyceraldehyde-3-phosphate dehydrogenase	GAPDH	14	1.09502	0.596626
P06744	Glucose-6-phosphate isomerase OS=Homo sapiens OX=9606 GN=GPI PE=1 SV=4	GPI	19	0.964	0.5386	Glucose-6-phosphate isomerase	GPI	12;12;12;12;10;7;7;7;7;3;3;2;2;2;2;1;1;1;1;1;1	1.0331	0.4943	Glucose-6-phosphate isomerase	GPI	12	1.05248	0.644262
P19367	Hexokinase-1 OS=Homo sapiens OX=9606 GN=HK1 PE=1 SV=3	HK1	33	0.985	0.7609	Hexokinase-1	HK1	21;21;21;21;6;3	1.0187	0.7897	Hexokinase-1	HK1	21	1.05007	0.493431
P14550	Aldo-keto reductase family 1 member A1 OS=Homo sapiens OX=9606 GN=AKR1A1 PE=1 SV=3	AKR1A1	14	1.069	0.4788	Aldo-keto reductase family 1 member A1	AKR1A1	7;2;2;2	0.9869	0.822	Alcohol dehydrogenase [NADP(+)]	AKR1A1	8	1.19609	0.381875
Q9UNW1	Multiple inositol polyphosphate phosphatase 1 OS=Homo sapiens OX=9606 GN=MINPP1 PE=1 SV=1	MINPP1	9	0.773	0.1035	Multiple inositol polyphosphate phosphatase 1	MINPP1	8;5;3;3	0.9795	0.8049	Multiple inositol polyphosphate phosphatase 1	MINPP1	8	0.926439	0.655798
P11177	Pyruvate dehydrogenase E1 component subunit beta, mitochondrial OS=Homo sapiens OX=9606 GN=PDHB PE=1 SV=3	PDHB	12	0.863	0.08582	Pyruvate dehydrogenase E1 component subunit beta, mitochondrial	PDHB	4;4;3;3;3	0.9722	0.4585	Pyruvate dehydrogenase E1 component subunit beta, mitochondrial	PDHB	4	1.02831	0.885167
P49419	Alpha-aminoadipic semialdehyde dehydrogenase OS=Homo sapiens OX=9606 GN=ALDH7A1 PE=1 SV=5	ALDH7A1	19	0.955	0.298	Alpha-aminoadipic semialdehyde dehydrogenase	ALDH7A1	15;15;15;15;14;14;13;12;12;11;8;8;4;4;4;3;1;1;1;1	0.947	0.2358	Alpha-aminoadipic semialdehyde dehydrogenase	ALDH7A1	15	0.980755	0.866617
Q9BRR6	ADP-dependent glucokinase OS=Homo sapiens OX=9606 GN=ADPGK PE=1 SV=1	ADPGK	10	1.025	0.7734	ADP-dependent glucokinase	ADPGK		0.9416	0.1922
P04075	Fructose-bisphosphate aldolase A OS=Homo sapiens OX=9606 GN=ALDOA PE=1 SV=2	ALDOA	23	0.891	0.006686	Fructose-bisphosphate aldolase A	ALDOA		0.9341	0.1983
P00338	L-lactate dehydrogenase A chain OS=Homo sapiens OX=9606 GN=LDHA PE=1 SV=2	LDHA	22	0.888	0.123	L-lactate dehydrogenase A chain	LDHA	14;14;10;9;9;8;7;5;4;4;3;1;1;1;1;1;1;1;1;1	0.9341	0.5463	L-lactate dehydrogenase A chain	LDHA	14	1.00881	0.928491
P52789	Hexokinase-2 OS=Homo sapiens OX=9606 GN=HK2 PE=1 SV=2	HK2	20	0.978	0.8096	Hexokinase-2	HK2		0.9185	0.1611
P30613	Pyruvate kinase PKLR OS=Homo sapiens OX=9606 GN=PKLR PE=1 SV=2	PKLR	1	0.858	0.1124	Pyruvate kinase PKLR	PKLR		0.9034	0.5367
P36871	Phosphoglucomutase-1 OS=Homo sapiens OX=9606 GN=PGM1 PE=1 SV=3	PGM1	23	0.89	0.005692	Phosphoglucomutase-1	PGM1	19;18;17;13	0.8695	0.0859	Phosphoglucomutase-1	PGM1	19	0.890285	0.231793
P10515	Dihydrolipoyllysine-residue acetyltransferase component of pyruvate dehydrogenase complex, mitochondrial OS=Homo sapiens OX=9606 GN=DLAT PE=1 SV=3	DLAT	12	0.842	0.01648	Dihydrolipoyllysine-residue acetyltransferase component of pyruvate dehydrogenase complex, mitochondrial	DLAT	9;7;6	0.8587	0.0593	Dihydrolipoyllysine-residue acetyltransferase component of pyruvate dehydrogenase complex, mitochondrial;Acetyltransferase component of pyruvate dehydrogenase complex	DLAT	9	0.921133	0.416776
P09622	Dihydrolipoyl dehydrogenase, mitochondrial OS=Homo sapiens OX=9606 GN=DLD PE=1 SV=2	DLD	7	0.776	0.001079	Dihydrolipoyl dehydrogenase, mitochondrial	DLD	3;3;2;2;1;1;1	0.8175	0.1304	Dihydrolipoyl dehydrogenase, mitochondrial;Dihydrolipoyl dehydrogenase	DLD	3	0.786701	0.0901673
P14618	Pyruvate kinase PKM OS=Homo sapiens OX=9606 GN=PKM PE=1 SV=4	PKM	36	0.837	0.006195	Pyruvate kinase PKM	PKM	26;23;23;12;7;7;6;2;1;1;1;1	0.8127	0.1879	Pyruvate kinase PKM;Pyruvate kinase	PKM	30	0.851321	0.226845
P05091	Aldehyde dehydrogenase, mitochondrial OS=Homo sapiens OX=9606 GN=ALDH2 PE=1 SV=2	ALDH2	17	1.053	0.7406	Aldehyde dehydrogenase, mitochondrial	ALDH2	9;8;3;3	0.7967	0.0146	Aldehyde dehydrogenase, mitochondrial	ALDH2	9	0.970162	0.728244
Q96G03	Phosphoglucomutase-2 OS=Homo sapiens OX=9606 GN=PGM2 PE=1 SV=4	PGM2	19	0.71	0.006591	Phosphoglucomutase-2	PGM2	10;5;2;1;1	0.7921	0.05	Phosphoglucomutase-2	PGM2	10	0.857641	0.259873
P49189	4-trimethylaminobutyraldehyde dehydrogenase OS=Homo sapiens OX=9606 GN=ALDH9A1 PE=1 SV=3	ALDH9A1	11	0.723	0.003211	4-trimethylaminobutyraldehyde dehydrogenase	ALDH9A1	4;4;4	0.7769	0.0753	4-trimethylaminobutyraldehyde dehydrogenase	ALDH9A1	4	0.818904	0.152172
P51648	Aldehyde dehydrogenase family 3 member A2 OS=Homo sapiens OX=9606 GN=ALDH3A2 PE=1 SV=1	ALDH3A2	8	0.767	0.02119	Aldehyde dehydrogenase family 3 member A2	ALDH3A2	3;3;3;1;1;1;1;1;1;1;1;1;1;1;1;1;1;1;1;1	0.7537	0.034	Fatty aldehyde dehydrogenase	ALDH3A2	3	0.723497	0.0628826
P35558	Phosphoenolpyruvate carboxykinase, cytosolic [GTP] OS=Homo sapiens OX=9606 GN=PCK1 PE=1 SV=3	PCK1	1	1.283	0.06918
P40394	All-trans-retinol dehydrogenase [NAD(+)] ADH7 OS=Homo sapiens OX=9606 GN=ADH7 PE=1 SV=2	ADH7	1	1.156	0.08509
P13929	Beta-enolase OS=Homo sapiens OX=9606 GN=ENO3 PE=1 SV=5	ENO3	6	1.089	0.9162
Q96C23	Galactose mutarotase OS=Homo sapiens OX=9606 GN=GALM PE=1 SV=1	GALM	1	1.008	0.9414
P07205	Phosphoglycerate kinase 2 OS=Homo sapiens OX=9606 GN=PGK2 PE=1 SV=3	PGK2	5	0.953	0.9029			5			Phosphoglycerate kinase 2	PGK2	6	1.72274	0.0309316
P52790	Hexokinase-3 OS=Homo sapiens OX=9606 GN=HK3 PE=1 SV=2	HK3	3	0.855	0.1086
P29803	Pyruvate dehydrogenase E1 component subunit alpha, testis-specific form, mitochondrial OS=Homo sapiens OX=9606 GN=PDHA2 PE=1 SV=1	PDHA2	1	0.813	0.03511
P43353	Aldehyde dehydrogenase family 3 member B1 OS=Homo sapiens OX=9606 GN=ALDH3B1 PE=1 SV=1	ALDH3B1	1	0.761	0.03129
P48448	Aldehyde dehydrogenase family 3 member B2 OS=Homo sapiens OX=9606 GN=ALDH3B2 PE=2 SV=3	ALDH3B2	1	0.761	0.03129
Q9BYZ2	L-lactate dehydrogenase A-like 6B OS=Homo sapiens OX=9606 GN=LDHAL6B PE=1 SV=3	LDHAL6B	1	0.723	0.6048
Q9NVS9	Pyridoxine-5'-phosphate oxidase OS=Homo sapiens OX=9606 GN=PNPO PE=1 SV=1	PNPO	5	0.584	0.03434	Pyridoxine-5'-phosphate oxidase	PNPO		0.9262	0.8322
Q9Y6U3	Adseverin OS=Homo sapiens OX=9606 GN=SCIN PE=1 SV=4	SCIN	14	4.254	1.031e-06	Adseverin	SCIN		11.3903	0
P10321	HLA class I histocompatibility antigen, C alpha chain OS=Homo sapiens OX=9606 GN=HLA-C PE=1 SV=3	HLA-C	6	2.412	4.399e-05	HLA class I histocompatibility antigen, C alpha chain	HLA-C	7;7;6;6;6;6;5;4;4;4;4;3;3;3;2;2;2;2;1;1	2.1437	0.011	HLA class I histocompatibility antigen, Cw-7 alpha chain	HLA-C	7	1.09207	0.625136
P62805	Histone H4 OS=Homo sapiens OX=9606 GN=H4C1 PE=1 SV=2	HIST1H4A; HIST1H4F; HIST1H4D; HIST1H4J; HIST2H4A; HIST2H4B; HIST1H4H; HIST1H4C; HIST4H4; HIST1H4E; HIST1H4I; HIST1H4B; HIST1H4K; HIST1H4L	9	1.379	6.506e-05	Histone H4	H4C1	7	1.4848	0.0019	Histone H4	HIST1H4A	8	1.33398	0.0306685
O60814	Histone H2B type 1-K OS=Homo sapiens OX=9606 GN=H2BC12 PE=1 SV=3	HIST1H2BK	6	1.529	0.001361	Histone H2B type 1-K;Histone H2B type F-S;Histone H2B type 1-D;Histone H2B type 1-C/E/F/G/I;Histone H2B type 2-F;Histone H2B type 1-H;Histone H2B type 1-N;Histone H2B type 1-M	H2BC12;H2BS1;H2BC5;H2BC4;H2BC18;H2BC9;H2BC15;H2BC14		1.4124	0.0093
P17612	cAMP-dependent protein kinase catalytic subunit alpha OS=Homo sapiens OX=9606 GN=PRKACA PE=1 SV=2	PRKACA	7	0.714	0.00146	cAMP-dependent protein kinase catalytic subunit alpha	PRKACA	6;6;3;3	0.7368	0.0042	cAMP-dependent protein kinase catalytic subunit alpha	PRKACA;KIN27	6	0.688003	0.00512752
Q9UNN4	TFIIA-alpha and beta-like factor OS=Homo sapiens OX=9606 GN=GTF2A1L PE=1 SV=2	GTF2A1L	1	500	1e+20
Q99525	Histone H4-like protein type G OS=Homo sapiens OX=9606 GN=H4C7 PE=1 SV=1	HIST1H4G	1	1.858	0.005694
P58876	Histone H2B type 1-D OS=Homo sapiens OX=9606 GN=H2BC5 PE=1 SV=2	HIST1H2BD	6	1.529	0.001361
P62807	Histone H2B type 1-C/E/F/G/I OS=Homo sapiens OX=9606 GN=H2BC4 PE=1 SV=4	HIST1H2BI; HIST1H2BD; HIST1H2BC; HIST1H2BF; HIST1H2BG; HIST1H2BE	6	1.529	0.001361
Q5QNW6	Histone H2B type 2-F OS=Homo sapiens OX=9606 GN=H2BC18 PE=1 SV=3	HIST2H2BF	6	1.529	0.001361
Q93079	Histone H2B type 1-H OS=Homo sapiens OX=9606 GN=H2BC9 PE=1 SV=3	HIST1H2BH	6	1.529	0.001361
Q99877	Histone H2B type 1-N OS=Homo sapiens OX=9606 GN=H2BC15 PE=1 SV=3	HIST1H2BN	6	1.529	0.001361
Q99879	Histone H2B type 1-M OS=Homo sapiens OX=9606 GN=H2BC14 PE=1 SV=3	HIST1H2BM	6	1.529	0.001361
Q99880	Histone H2B type 1-L OS=Homo sapiens OX=9606 GN=H2BC13 PE=1 SV=3	HIST1H2BL	6	1.529	0.001361
P22612	cAMP-dependent protein kinase catalytic subunit gamma OS=Homo sapiens OX=9606 GN=PRKACG PE=1 SV=3	PRKACG	3	0.662	0.0001497
O43731	ER lumen protein-retaining receptor 3 OS=Homo sapiens OX=9606 GN=KDELR3 PE=1 SV=1	KDELR3	1	0.002	1e+20	ER lumen protein-retaining receptor 3	KDELR3		1.9874	0.2958
Q15746	Myosin light chain kinase, smooth muscle OS=Homo sapiens OX=9606 GN=MYLK PE=1 SV=4	MYLK	38	1.496	7.834e-05	Myosin light chain kinase, smooth muscle	MYLK	30;30;29;29;28;27;14;14;11;3;2;2;2	1.563	0.0001	Myosin light chain kinase, smooth muscle;Myosin light chain kinase, smooth muscle, deglutamylated form	MYLK	31	1.61776	0.00711333
P62736	Actin, aortic smooth muscle OS=Homo sapiens OX=9606 GN=ACTA2 PE=1 SV=1	ACTA2	28	1.303	0.0001381	Actin, aortic smooth muscle	ACTA2	16;15;11;7;7;7;4;4	1.407	0.0184	Actin, aortic smooth muscle;Actin, gamma-enteric smooth muscle	ACTA2;ACTG2	17	2.5197	0.00511077
P63267	Actin, gamma-enteric smooth muscle OS=Homo sapiens OX=9606 GN=ACTG2 PE=1 SV=1	ACTG2	27	1.241	0.0009152
Q13620	Cullin-4B OS=Homo sapiens OX=9606 GN=CUL4B PE=1 SV=4	CUL4B	17	0.51	0.00198	Cullin-4B	CUL4B		0.6339	0.0029
Q9C0C9	(E3-independent) E2 ubiquitin-conjugating enzyme OS=Homo sapiens OX=9606 GN=UBE2O PE=1 SV=3	UBE2O	5	2.991	0.07593	(E3-independent) E2 ubiquitin-conjugating enzyme	UBE2O		0.9928	0.9149
Q15751	Probable E3 ubiquitin-protein ligase HERC1 OS=Homo sapiens OX=9606 GN=HERC1 PE=1 SV=2	HERC1	1	500	1e+20			6;1			Probable E3 ubiquitin-protein ligase HERC1	HERC1	6	1.85234	0.0744003
Q96LR5	Ubiquitin-conjugating enzyme E2 E2 OS=Homo sapiens OX=9606 GN=UBE2E2 PE=1 SV=1	UBE2E2	2	2.217	0.004362
Q9Y2Z9	Ubiquinone biosynthesis monooxygenase COQ6, mitochondrial OS=Homo sapiens OX=9606 GN=COQ6 PE=1 SV=2	COQ6	1	1.911	0.02391	Ubiquinone biosynthesis monooxygenase COQ6, mitochondrial	COQ6		0.8305	0.7617
Q9UBG0	C-type mannose receptor 2 OS=Homo sapiens OX=9606 GN=MRC2 PE=1 SV=2	MRC2	23	1.297	0.02471	C-type mannose receptor 2	MRC2	17;4;1	1.2556	0.0327	C-type mannose receptor 2	MRC2	19	1.35929	0.0599249
Q71DI3	Histone H3.2 OS=Homo sapiens OX=9606 GN=H3C15 PE=1 SV=3	HIST2H3A; HIST2H3C; HIST2H3D	6	1.163	0.8176	Histone H3.2	H3C15		1.872	0.2374
P68431	Histone H3.1 OS=Homo sapiens OX=9606 GN=H3C1 PE=1 SV=2	HIST1H3F; HIST1H3C; HIST1H3D; HIST1H3G; HIST1H3H; HIST1H3B; HIST1H3A; HIST1H3E; HIST1H3I; HIST1H3J	6	1.138	0.7999	Histone H3.1	H3C1		1.1394	0.7992
Q16695	Histone H3.1t OS=Homo sapiens OX=9606 GN=H3-4 PE=1 SV=3	HIST3H3	5	1.397	0.6682
Q7Z406	Myosin-14 OS=Homo sapiens OX=9606 GN=MYH14 PE=1 SV=2	MYH14	15	1.169	0.3791	Myosin-14	MYH14	10;10;10;9;9;5;5	1.1531	0.2611	Myosin-14	MYH14	11	1.11934	0.728435
Q9Y2J2	Band 4.1-like protein 3 OS=Homo sapiens OX=9606 GN=EPB41L3 PE=1 SV=2	EPB41L3	24	1.463	0.001443	Band 4.1-like protein 3	EPB41L3	18;16;16;16;16;15;14;7;5;4;4;4;4;2;2;2;2;2;1;1;1	1.6426	0	Band 4.1-like protein 3;Band 4.1-like protein 3, N-terminally processed	EPB41L3	19	1.7864	0.00613917
Q96QZ7	Membrane-associated guanylate kinase, WW and PDZ domain-containing protein 1 OS=Homo sapiens OX=9606 GN=MAGI1 PE=1 SV=3	MAGI1	12	0.489	0.00819	Membrane-associated guanylate kinase, WW and PDZ domain-containing protein 1	MAGI1		0.9043	0.7546
Q13813	Spectrin alpha chain, non-erythrocytic 1 OS=Homo sapiens OX=9606 GN=SPTAN1 PE=1 SV=3	SPTAN1	118	0.679	0.0005299	Spectrin alpha chain, non-erythrocytic 1	SPTAN1	76;75;75;74;74;5;1;1;1	0.7103	0.0158	Spectrin alpha chain, non-erythrocytic 1	SPTAN1	76	0.694663	0.0349055
P62070	Ras-related protein R-Ras2 OS=Homo sapiens OX=9606 GN=RRAS2 PE=1 SV=1	RRAS2	9	0.516	0.000246	Ras-related protein R-Ras2	RRAS2	5;5;4;3;3;1	0.5472	0.0079	Ras-related protein R-Ras2	RRAS2	5
Q8N3E9	1-phosphatidylinositol 4,5-bisphosphate phosphodiesterase delta-3 OS=Homo sapiens OX=9606 GN=PLCD3 PE=1 SV=3	PLCD3	3	500	1e+20	1-phosphatidylinositol 4,5-bisphosphate phosphodiesterase delta-3	PLCD3		1.4802	0.0488
P36021	Monocarboxylate transporter 8 OS=Homo sapiens OX=9606 GN=SLC16A2 PE=1 SV=2	SLC16A2	2	0.358	0.02548
Q9UM47	Neurogenic locus notch homolog protein 3 OS=Homo sapiens OX=9606 GN=NOTCH3 PE=1 SV=2	NOTCH3	5	0.002	1e+20	Neurogenic locus notch homolog protein 3	NOTCH3	5	0.4284	0.0003	Neurogenic locus notch homolog protein 3;Notch 3 extracellular truncation;Notch 3 intracellular domain	NOTCH3	6	0.469174	0.0146539
P07996	Thrombospondin-1 OS=Homo sapiens OX=9606 GN=THBS1 PE=1 SV=2	THBS1	51	1.456	7.424e-05	Thrombospondin-1	THBS1	28;21;5	1.6721	0.0065	Thrombospondin-1	THBS1	28	1.57125	0.00424798
Q9NYW5	Taste receptor type 2 member 4 OS=Homo sapiens OX=9606 GN=TAS2R4 PE=1 SV=1	TAS2R4	1	0.782	0.6119
Q07889	Son of sevenless homolog 1 OS=Homo sapiens OX=9606 GN=SOS1 PE=1 SV=1	SOS1	2	0.493	0.1548	Son of sevenless homolog 1	SOS1		1.6423	0.0647
P05455	Lupus La protein OS=Homo sapiens OX=9606 GN=SSB PE=1 SV=2	SSB	18	1.81	0.001006	Lupus La protein	SSB	9;6;4;4	1.8244	0.0012	Lupus La protein	SSB	9	1.98382	0.0103429
P04908	Histone H2A type 1-B/E OS=Homo sapiens OX=9606 GN=H2AC4 PE=1 SV=2	HIST1H2AB; HIST1H2AE	5	1.251	0.007168	Histone H2A type 1-B/E;Histone H2A type 1;Histone H2A type 1-D;Histone H2A type 2-C;Histone H2A type 2-A;Histone H2A type 3;Histone H2A type 1-C;Histone H2A type 1-H;Histone H2A type 1-J;Histone H2A.J	H2AC4;H2AC11;H2AC7;H2AC20;H2AC18;H2AW;H2AC6;H2AC12;H2AC14;H2AJ		1.7468	0.012
P16104	Histone H2AX OS=Homo sapiens OX=9606 GN=H2AX PE=1 SV=2	H2AFX	4	1.513	0.08983	Histone H2AX;Histone H2A type 1-A	H2AX;H2AC1		1.5185	0.0467
P0C0S5	Histone H2A.Z OS=Homo sapiens OX=9606 GN=H2AZ1 PE=1 SV=2	H2AFZ	4	1.473	0.0532	Histone H2A.Z;Histone H2A.V	H2AZ1;H2AZ2		0.8597	0.6461
Q8IUE6	Histone H2A type 2-B OS=Homo sapiens OX=9606 GN=H2AC21 PE=1 SV=3	HIST2H2AB	2	1.513	0.08983
Q96QV6	Histone H2A type 1-A OS=Homo sapiens OX=9606 GN=H2AC1 PE=1 SV=3	HIST1H2AA	4	1.513	0.08983
Q71UI9	Histone H2A.V OS=Homo sapiens OX=9606 GN=H2AZ2 PE=1 SV=3	H2AFV	4	1.473	0.0532
P0C0S8	Histone H2A type 1 OS=Homo sapiens OX=9606 GN=H2AC11 PE=1 SV=2	HIST1H2AG; HIST1H2AM; HIST1H2AI; HIST1H2AK; HIST1H2AL	5	1.251	0.007168
P20671	Histone H2A type 1-D OS=Homo sapiens OX=9606 GN=H2AC7 PE=1 SV=2	HIST1H2AD	5	1.251	0.007168
Q16777	Histone H2A type 2-C OS=Homo sapiens OX=9606 GN=H2AC20 PE=1 SV=4	HIST2H2AC	5	1.251	0.007168
Q6FI13	Histone H2A type 2-A OS=Homo sapiens OX=9606 GN=H2AC18 PE=1 SV=3	HIST2H2AA4; HIST2H2AA3	5	1.251	0.007168
Q7L7L0	Histone H2A type 3 OS=Homo sapiens OX=9606 GN=H2AW PE=1 SV=3	HIST3H2A	5	1.251	0.007168
Q93077	Histone H2A type 1-C OS=Homo sapiens OX=9606 GN=H2AC6 PE=1 SV=3	HIST1H2AC	5	1.251	0.007168
Q96KK5	Histone H2A type 1-H OS=Homo sapiens OX=9606 GN=H2AC12 PE=1 SV=3	HIST1H2AH	5	1.251	0.007168
Q99878	Histone H2A type 1-J OS=Homo sapiens OX=9606 GN=H2AC14 PE=1 SV=3	HIST1H2AJ; HIST1H2AK	5	1.251	0.007168
Q9BTM1	Histone H2A.J OS=Homo sapiens OX=9606 GN=H2AJ PE=1 SV=1	H2AFJ	5	1.251	0.007168
Q9Y6N5	Sulfide:quinone oxidoreductase, mitochondrial OS=Homo sapiens OX=9606 GN=SQOR PE=1 SV=1	SQRDL; SQOR	4	1.885	0.001345	Sulfide:quinone oxidoreductase, mitochondrial	SQOR	8;4;3;2;1;1	1.4602	0.016	Sulfide:quinone oxidoreductase, mitochondrial	SQRDL	8	1.38234	0.04096
O95571	Persulfide dioxygenase ETHE1, mitochondrial OS=Homo sapiens OX=9606 GN=ETHE1 PE=1 SV=2	ETHE1	3	0.334	0.001195	Persulfide dioxygenase ETHE1, mitochondrial	ETHE1		0.597	0.0205
P51991	Heterogeneous nuclear ribonucleoprotein A3 OS=Homo sapiens OX=9606 GN=HNRNPA3 PE=1 SV=2	HNRNPA3	8	1.889	0.0003098	Heterogeneous nuclear ribonucleoprotein A3	HNRNPA3	6;6;2	2.0074	0.0011	Heterogeneous nuclear ribonucleoprotein A3	HNRNPA3	6	2.38357	0.00309259
O75940	Survival of motor neuron-related-splicing factor 30 OS=Homo sapiens OX=9606 GN=SMNDC1 PE=1 SV=1	SMNDC1	2	500	1e+20	Survival of motor neuron-related-splicing factor 30	SMNDC1		1.7848	0.0336
O75400	Pre-mRNA-processing factor 40 homolog A OS=Homo sapiens OX=9606 GN=PRPF40A PE=1 SV=2	PRPF40A	8	1.68	0.01822	Pre-mRNA-processing factor 40 homolog A	PRPF40A		1.5957	0.0053
Q86V81	THO complex subunit 4 OS=Homo sapiens OX=9606 GN=ALYREF PE=1 SV=3	ALYREF	3	1.439	0.00349	THO complex subunit 4	ALYREF		1.3414	0.0674
P62314	Small nuclear ribonucleoprotein Sm D1 OS=Homo sapiens OX=9606 GN=SNRPD1 PE=1 SV=1	SNRPD1	5	1.457	0.05068	Small nuclear ribonucleoprotein Sm D1	SNRPD1	4;3;1	1.329	0.0771	Small nuclear ribonucleoprotein Sm D1	SNRPD1	4	1.55124	0.106836
P49756	RNA-binding protein 25 OS=Homo sapiens OX=9606 GN=RBM25 PE=1 SV=3	RBM25	13	1.953	0.0005884	RNA-binding protein 25	RBM25	10;5;5;3;2	1.2508	0.0011	RNA-binding protein 25	RBM25	10	1.34146	0.042851
O60231	Pre-mRNA-splicing factor ATP-dependent RNA helicase DHX16 OS=Homo sapiens OX=9606 GN=DHX16 PE=1 SV=2	DHX16	4	0.675	0.1547	Pre-mRNA-splicing factor ATP-dependent RNA helicase DHX16	DHX16	7;5;4;3;2;1	1.1492	0.2419	Putative pre-mRNA-splicing factor ATP-dependent RNA helicase DHX16	DHX16	7	1.23025	0.0851727
Q16629	Serine/arginine-rich splicing factor 7 OS=Homo sapiens OX=9606 GN=SRSF7 PE=1 SV=1	SRSF7	4	1.261	0.0159	Serine/arginine-rich splicing factor 7	SRSF7		1.0221	0.9319
Q96E39	RNA binding motif protein, X-linked-like-1 OS=Homo sapiens OX=9606 GN=RBMXL1 PE=1 SV=1	RBMXL1	5	1.263	0.04578
P23219	Prostaglandin G/H synthase 1 OS=Homo sapiens OX=9606 GN=PTGS1 PE=1 SV=2	PTGS1	8	6.395	0.001192	Prostaglandin G/H synthase 1	PTGS1		3.8321	0.0012
Q6YP21	Kynurenine--oxoglutarate transaminase 3 OS=Homo sapiens OX=9606 GN=KYAT3 PE=1 SV=1	CCBL2; KYAT3	8	0.789	0.02423	Kynurenine--oxoglutarate transaminase 3	KYAT3	5;5;4;2	0.7656	0.0526	Kynurenine--oxoglutarate transaminase 3	CCBL2	5	0.687273	0.0630766
Q16881	Thioredoxin reductase 1, cytoplasmic OS=Homo sapiens OX=9606 GN=TXNRD1 PE=1 SV=3	TXNRD1	19	1.603	0.0002338	Thioredoxin reductase 1, cytoplasmic	TXNRD1	11;11;11;11;11;11;11;11;11;11;10;9;9;5;4;4;3;3;2;1	1.6613	0.0002	Thioredoxin reductase 1, cytoplasmic	TXNRD1	11	1.96834	0.00011544
Q9NNW7	Thioredoxin reductase 2, mitochondrial OS=Homo sapiens OX=9606 GN=TXNRD2 PE=1 SV=3	TXNRD2	4	0.293	0.04467	Thioredoxin reductase 2, mitochondrial	TXNRD2		0.662	0.0061
Q9NSK0	Kinesin light chain 4 OS=Homo sapiens OX=9606 GN=KLC4 PE=1 SV=3	KLC4	8	0.995	0.9922	Kinesin light chain 4	KLC4		0.9298	0.476
Q6P597	Kinesin light chain 3 OS=Homo sapiens OX=9606 GN=KLC3 PE=1 SV=2	KLC3	1	0.687	0.03364
Q9H9A5	CCR4-NOT transcription complex subunit 10 OS=Homo sapiens OX=9606 GN=CNOT10 PE=1 SV=1	CNOT10	4	0.819	0.6636	CCR4-NOT transcription complex subunit 10	CNOT10	4;4;3;3;3;2;2;2;2	0.7679	0.1346	CCR4-NOT transcription complex subunit 10	CNOT10	4	0.809762	0.22214
P05161	Ubiquitin-like protein ISG15 OS=Homo sapiens OX=9606 GN=ISG15 PE=1 SV=5	ISG15	3	1.353	0.01522	Ubiquitin-like protein ISG15	ISG15		1.9335	0.0002
P78346	Ribonuclease P protein subunit p30 OS=Homo sapiens OX=9606 GN=RPP30 PE=1 SV=1	RPP30	7	1.694	0.3457	Ribonuclease P protein subunit p30	RPP30		1.3932	0.0434
Q96G21	U3 small nucleolar ribonucleoprotein protein IMP4 OS=Homo sapiens OX=9606 GN=IMP4 PE=1 SV=1	IMP4	2	1.58	0.03771	U3 small nucleolar ribonucleoprotein protein IMP4	IMP4		1.0249	0.8957
P40429	60S ribosomal protein L13a OS=Homo sapiens OX=9606 GN=RPL13A PE=1 SV=2	RPL13A	5	1.217	0.2596	60S ribosomal protein L13a	RPL13A	4;3;2;2;1;1	1.2016	0.2063	60S ribosomal protein L13a;Putative 60S ribosomal protein L13a protein RPL13AP3	RPL13A;RPL13a;RPL13AP3	4	1.20851	0.306636
P62899	60S ribosomal protein L31 OS=Homo sapiens OX=9606 GN=RPL31 PE=1 SV=1	RPL31	3	0.824	0.816	60S ribosomal protein L31	RPL31		1.1285	0.1517
P50914	60S ribosomal protein L14 OS=Homo sapiens OX=9606 GN=RPL14 PE=1 SV=4	RPL14	5	1.311	0.1403	60S ribosomal protein L14	RPL14		1.0008	0.9967
P30043	Flavin reductase (NADPH) OS=Homo sapiens OX=9606 GN=BLVRB PE=1 SV=3	BLVRB	5	1.57	0.0007107	Flavin reductase (NADPH)	BLVRB		1.5446	0.0021
Q86UR5	Regulating synaptic membrane exocytosis protein 1 OS=Homo sapiens OX=9606 GN=RIMS1 PE=1 SV=1	RIMS1	3	500	1e+20
P54750	Calcium/calmodulin-dependent 3',5'-cyclic nucleotide phosphodiesterase 1A OS=Homo sapiens OX=9606 GN=PDE1A PE=1 SV=2	PDE1A	1	0.69	0.1304
Q01064	Calcium/calmodulin-dependent 3',5'-cyclic nucleotide phosphodiesterase 1B OS=Homo sapiens OX=9606 GN=PDE1B PE=1 SV=2	PDE1B	1	0.69	0.1304
Q9Y2A7	Nck-associated protein 1 OS=Homo sapiens OX=9606 GN=NCKAP1 PE=1 SV=1	NCKAP1	14	1.835	0.1144	Nck-associated protein 1	NCKAP1	7;7	1.2363	0.0023	Nck-associated protein 1	NCKAP1	7	1.3421	0.0865757
P29317	Ephrin type-A receptor 2 OS=Homo sapiens OX=9606 GN=EPHA2 PE=1 SV=2	EPHA2	17	0.631	0.01814	Ephrin type-A receptor 2	EPHA2	10;1;1;1	0.588	0.0069	Ephrin type-A receptor 2	EPHA2	10	0.644011	0.021743
Q15139	Serine/threonine-protein kinase D1 OS=Homo sapiens OX=9606 GN=PRKD1 PE=1 SV=2	PRKD1	6	1.93	0.1053	Serine/threonine-protein kinase D1	PRKD1	5;5;2;2;2;1;1;1;1;1;1;1;1;1;1;1;1;1;1;1	1.5729	0.0001	Serine/threonine-protein kinase D1;Serine/threonine-protein kinase	PRKD1	5	2.10063	0.00191299
P14621	Acylphosphatase-2 OS=Homo sapiens OX=9606 GN=ACYP2 PE=1 SV=2	ACYP2	1	0.002	1e+20
O95340	Bifunctional 3'-phosphoadenosine 5'-phosphosulfate synthase 2 OS=Homo sapiens OX=9606 GN=PAPSS2 PE=1 SV=2	PAPSS2	19	1.185	0.07849	Bifunctional 3'-phosphoadenosine 5'-phosphosulfate synthase 2	PAPSS2	12;12	1.8141	0	Bifunctional 3-phosphoadenosine 5-phosphosulfate synthase 2;Sulfate adenylyltransferase;Adenylyl-sulfate kinase	PAPSS2	12	1.58084	0.000550635
P00568	Adenylate kinase isoenzyme 1 OS=Homo sapiens OX=9606 GN=AK1 PE=1 SV=3	AK1	8	0.507	0.0006601	Adenylate kinase isoenzyme 1	AK1	6;6;2	0.7282	0.0171	Adenylate kinase isoenzyme 1	AK1	6	0.688741	0.0136682
P55263	Adenosine kinase OS=Homo sapiens OX=9606 GN=ADK PE=1 SV=2	ADK	8	0.625	0.001807	Adenosine kinase	ADK	6;6;5;4	0.724	0.0043	Adenosine kinase	ADK	6	0.770624	0.0510265
P00491	Purine nucleoside phosphorylase OS=Homo sapiens OX=9606 GN=PNP PE=1 SV=2	PNP	12	0.473	1.984e-05	Purine nucleoside phosphorylase	PNP	9;7;4;2	0.4984	0.0002	Purine nucleoside phosphorylase	PNP	10	0.489552	0.0112872
P51884	Lumican OS=Homo sapiens OX=9606 GN=LUM PE=1 SV=2	LUM	7	0.57	0.00986	Lumican	LUM	4	0.6816	0.0305	Lumican	LUM	4	0.726626	0.00349079
Q12955	Ankyrin-3 OS=Homo sapiens OX=9606 GN=ANK3 PE=1 SV=3	ANK3	1	500	1e+20
Q96HE7	ERO1-like protein alpha OS=Homo sapiens OX=9606 GN=ERO1A PE=1 SV=2	ERO1L; ERO1A	17	1.317	0.002679	ERO1-like protein alpha	ERO1A	11;5;3;3;1	1.4603	0.026	ERO1-like protein alpha	ERO1L	11	1.54773	0.0808628
Q99933	BAG family molecular chaperone regulator 1 OS=Homo sapiens OX=9606 GN=BAG1 PE=1 SV=4	BAG1	1	0.21	0.2512	BAG family molecular chaperone regulator 1	BAG1		1.2217	0.0774
Q9H3Z4	DnaJ homolog subfamily C member 5 OS=Homo sapiens OX=9606 GN=DNAJC5 PE=1 SV=1	DNAJC5	3	0.599	0.04776	DnaJ homolog subfamily C member 5	DNAJC5		1.1988	0.4049
P51572	B-cell receptor-associated protein 31 OS=Homo sapiens OX=9606 GN=BCAP31 PE=1 SV=3	BCAP31	4	0.553	0.4604
P37108	Signal recognition particle 14 kDa protein OS=Homo sapiens OX=9606 GN=SRP14 PE=1 SV=2	SRP14	3	1.349	0.5484	Signal recognition particle 14 kDa protein	SRP14		2.2113	0.0029
P12109	Collagen alpha-1(VI) chain OS=Homo sapiens OX=9606 GN=COL6A1 PE=1 SV=3	COL6A1	30	1.439	5.401e-05	Collagen alpha-1(VI) chain	COL6A1		1.3377	0.0002
P39059	Collagen alpha-1(XV) chain OS=Homo sapiens OX=9606 GN=COL15A1 PE=1 SV=2	COL15A1	2	2.342	0.0001571	Collagen alpha-1(XV) chain	COL15A1		7.9984	0
Q99715	Collagen alpha-1(XII) chain OS=Homo sapiens OX=9606 GN=COL12A1 PE=1 SV=2	COL12A1	113	3.041	0.0001716	Collagen alpha-1(XII) chain	COL12A1		3.2824	0.0002
P12107	Collagen alpha-1(XI) chain OS=Homo sapiens OX=9606 GN=COL11A1 PE=1 SV=4	COL11A1	20	1.932	0.001922	Collagen alpha-1(XI) chain	COL11A1	14;14;14;14;10;10;10;10;8;6;5	1.9051	0.0023	Collagen alpha-1(XI) chain	COL11A1	18	1.85223	0.0411075
P12110	Collagen alpha-2(VI) chain OS=Homo sapiens OX=9606 GN=COL6A2 PE=1 SV=4	COL6A2	24	1.269	0.00113	Collagen alpha-2(VI) chain	COL6A2	14;13;13;3;2	1.2964	0.004	Collagen alpha-2(VI) chain	COL6A2	15	1.2325	0.0243469
Q05707	Collagen alpha-1(XIV) chain OS=Homo sapiens OX=9606 GN=COL14A1 PE=1 SV=3	COL14A1	3	3.032	7.2e-06
P27487	Dipeptidyl peptidase 4 OS=Homo sapiens OX=9606 GN=DPP4 PE=1 SV=2	DPP4	1	1.59				3			Dipeptidyl peptidase 4;Dipeptidyl peptidase 4 membrane form;Dipeptidyl peptidase 4 soluble form	DPP4	3	0.939807	0.736532
P13591	Neural cell adhesion molecule 1 OS=Homo sapiens OX=9606 GN=NCAM1 PE=1 SV=3	NCAM1	3	0.454	0.03728	Neural cell adhesion molecule 1	NCAM1		0.5371	0.0685
O15394	Neural cell adhesion molecule 2 OS=Homo sapiens OX=9606 GN=NCAM2 PE=1 SV=2	NCAM2	2	1.736	0.006858
P00813	Adenosine deaminase OS=Homo sapiens OX=9606 GN=ADA PE=1 SV=3	ADA	5	1.568	0.1795	Adenosine deaminase	ADA		3.231	0.1036
Q99541	Perilipin-2 OS=Homo sapiens OX=9606 GN=PLIN2 PE=1 SV=2	PLIN2	5	3.47	8.35e-05	Perilipin-2	PLIN2	4;2;1;1	2.264	0.0003	Perilipin-2	PLIN2	4	2.11624	0.006288
Q6PCB7	Long-chain fatty acid transport protein 1 OS=Homo sapiens OX=9606 GN=SLC27A1 PE=1 SV=1	SLC27A1	12	3.075	0.004261	Long-chain fatty acid transport protein 1	SLC27A1	6;5;1;1	2.2061	0.0002	Long-chain fatty acid transport protein 1	SLC27A1	6	2.83178	0.00487785
Q01469	Fatty acid-binding protein 5 OS=Homo sapiens OX=9606 GN=FABP5 PE=1 SV=3	FABP5	3	2.644	0.002256	Fatty acid-binding protein 5	FABP5		1.3299	0.0007
P49747	Cartilage oligomeric matrix protein OS=Homo sapiens OX=9606 GN=COMP PE=1 SV=2	COMP	13	0.477	0.00282	Cartilage oligomeric matrix protein	COMP		0.5142	0.0037
P0C0L4	Complement C4-A OS=Homo sapiens OX=9606 GN=C4A PE=1 SV=2	C4A; C4B	4	0.123		Complement C4-A;Complement C4-B	C4A;C4B		1.3465	0.0038
P0C0L5	Complement C4-B OS=Homo sapiens OX=9606 GN=C4B PE=1 SV=2	C4B; C4B_2; LOC100293534	4	0.123
O00116	Alkyldihydroxyacetonephosphate synthase, peroxisomal OS=Homo sapiens OX=9606 GN=AGPS PE=1 SV=1	AGPS	12	1.536	0.006187	Alkyldihydroxyacetonephosphate synthase, peroxisomal	AGPS	9;8;8;2	1.6529	0.0004	Alkyldihydroxyacetonephosphate synthase, peroxisomal	AGPS	9	1.73174	0.00560809
Q8WVX9	Fatty acyl-CoA reductase 1 OS=Homo sapiens OX=9606 GN=FAR1 PE=1 SV=1	FAR1	4	1.91	0.04024	Fatty acyl-CoA reductase 1	FAR1		1.3858	0.1089
P51659	Peroxisomal multifunctional enzyme type 2 OS=Homo sapiens OX=9606 GN=HSD17B4 PE=1 SV=3	HSD17B4	21	0.993	0.6083	Peroxisomal multifunctional enzyme type 2	HSD17B4		0.6869	0.0017
P22307	Sterol carrier protein 2 OS=Homo sapiens OX=9606 GN=SCP2 PE=1 SV=2	SCP2	13	1.159	0.214	Sterol carrier protein 2	SCP2	11;10;10;10;7;7;5;4;3;3;1;1	0.6701	0.0127	Non-specific lipid-transfer protein	SCP2	11	0.678353	0.00196574
Q9UKU0	Long-chain-fatty-acid--CoA ligase 6 OS=Homo sapiens OX=9606 GN=ACSL6 PE=1 SV=4	ACSL6	1	0.692	0.3864
Q96QV1	Hedgehog-interacting protein OS=Homo sapiens OX=9606 GN=HHIP PE=1 SV=3	HHIP	1	0.002	1e+20
P15311	Ezrin OS=Homo sapiens OX=9606 GN=EZR PE=1 SV=4	EZR	21	0.669	5.532e-06	Ezrin	EZR		0.4581	0.0003
P54687	Branched-chain-amino-acid aminotransferase, cytosolic OS=Homo sapiens OX=9606 GN=BCAT1 PE=1 SV=3	BCAT1	6	0.571	0.01027	Branched-chain-amino-acid aminotransferase, cytosolic	BCAT1		0.9059	0.631
Q15181	Inorganic pyrophosphatase OS=Homo sapiens OX=9606 GN=PPA1 PE=1 SV=2	PPA1	16	0.692	0.000428	Inorganic pyrophosphatase	PPA1	11;6	0.7178	0.0003	Inorganic pyrophosphatase	PPA1	11	0.774696	0.140277
Q9H2U2	Inorganic pyrophosphatase 2, mitochondrial OS=Homo sapiens OX=9606 GN=PPA2 PE=1 SV=2	PPA2	10	0.607	0.04035	Inorganic pyrophosphatase 2, mitochondrial	PPA2	4;4;4;3;3;3;1;1;1;1	0.7054	0.0755	Inorganic pyrophosphatase 2, mitochondrial	PPA2	4	0.811245	0.0775713
P42330	Aldo-keto reductase family 1 member C3 OS=Homo sapiens OX=9606 GN=AKR1C3 PE=1 SV=4	AKR1C3	5	0.002	1e+20	Aldo-keto reductase family 1 member C3	AKR1C3		0.3037	0.012
Q9NTJ4	Alpha-mannosidase 2C1 OS=Homo sapiens OX=9606 GN=MAN2C1 PE=1 SV=1	MAN2C1	1	0.591	0.4716
P78324	Tyrosine-protein phosphatase non-receptor type substrate 1 OS=Homo sapiens OX=9606 GN=SIRPA PE=1 SV=2	SIRPA	9	1.784	0.001804	Tyrosine-protein phosphatase non-receptor type substrate 1	SIRPA	6;6;6;3;2	1.5003	0.0574	Tyrosine-protein phosphatase non-receptor type substrate 1;Signal-regulatory protein beta-1 isoform 3	SIRPA;SIRPB1	6	1.70874	0.0819961
Q14192	Four and a half LIM domains protein 2 OS=Homo sapiens OX=9606 GN=FHL2 PE=1 SV=3	FHL2	16	0.636	0.002333	Four and a half LIM domains protein 2	FHL2		0.6206	0.5024
Q5TFQ8	Signal-regulatory protein beta-1 isoform 3 OS=Homo sapiens OX=9606 GN=SIRPB1 PE=1 SV=1	SIRPB1	5	1.807	0.03075
Q9UQE7	Structural maintenance of chromosomes protein 3 OS=Homo sapiens OX=9606 GN=SMC3 PE=1 SV=2	SMC3	18	1.368	0.003456	Structural maintenance of chromosomes protein 3	SMC3	10	1.4405	0.0021	Structural maintenance of chromosomes protein 3	SMC3	11	1.58183	0.0290458
Q8NGM9	Olfactory receptor 8D4 OS=Homo sapiens OX=9606 GN=OR8D4 PE=2 SV=1	OR8D4	1	2.099	0.04776
Q9UGF5	Olfactory receptor 14J1 OS=Homo sapiens OX=9606 GN=OR14J1 PE=2 SV=1	OR14J1	1	1.572	0.1779
Q9H341	Olfactory receptor 51M1 OS=Homo sapiens OX=9606 GN=OR51M1 PE=3 SV=4	OR51M1	1	0.489	0.1238
Q03468	DNA excision repair protein ERCC-6 OS=Homo sapiens OX=9606 GN=ERCC6 PE=1 SV=1	ERCC6	3	1.61	0.00304	DNA excision repair protein ERCC-6	ERCC6		0.7704	0.0803
P49757	Protein numb homolog OS=Homo sapiens OX=9606 GN=NUMB PE=1 SV=2	NUMB	9	0.574	0.004904	Protein numb homolog	NUMB	6;6;6;6;6;6;6;6;4;4;3;2;1;1	1.1981	0.1125	Protein numb homolog	NUMB	6	0.722761	0.0150068
Q16666	Gamma-interferon-inducible protein 16 OS=Homo sapiens OX=9606 GN=IFI16 PE=1 SV=3	IFI16	15	1.432	0.003701	Gamma-interferon-inducible protein 16	IFI16	8;8;8;8;3;2;2;2;2;1;1;1;1;1;1;1	1.5192	0.0006	Gamma-interferon-inducible protein 16	IFI16	8	1.69479	0.00187052
P58335	Anthrax toxin receptor 2 OS=Homo sapiens OX=9606 GN=ANTXR2 PE=1 SV=5	ANTXR2	3	2.627	0.1091	Anthrax toxin receptor 2	ANTXR2	5;5;5;5	1.1228	0.4928	Anthrax toxin receptor 2	ANTXR2	5	1.81342	0.103351
Q8TDX7	Serine/threonine-protein kinase Nek7 OS=Homo sapiens OX=9606 GN=NEK7 PE=1 SV=1	NEK7	10	0.626	4.287e-05	Serine/threonine-protein kinase Nek7	NEK7	8;3;2;1;1;1;1;1;1;1;1;1;1	0.6671	0.0003	Serine/threonine-protein kinase Nek7	NEK7	9	0.594323	0.00134333
P48167	Glycine receptor subunit beta OS=Homo sapiens OX=9606 GN=GLRB PE=1 SV=1	GLRB	1	0.549	0.09031
Q15118	[Pyruvate dehydrogenase (acetyl-transferring)] kinase isozyme 1, mitochondrial OS=Homo sapiens OX=9606 GN=PDK1 PE=1 SV=1	PDK1	4	1.983	0.1682	[Pyruvate dehydrogenase (acetyl-transferring)] kinase isozyme 1, mitochondrial	PDK1		2.7794	0.0162
Q9H6U8	Alpha-1,2-mannosyltransferase ALG9 OS=Homo sapiens OX=9606 GN=ALG9 PE=1 SV=2	ALG9	4	2.001	0.003259	Alpha-1,2-mannosyltransferase ALG9	ALG9		0.96	0.661
Q10472	Polypeptide N-acetylgalactosaminyltransferase 1 OS=Homo sapiens OX=9606 GN=GALNT1 PE=1 SV=1	GALNT1	12	2.396	0.009737	Polypeptide N-acetylgalactosaminyltransferase 1	GALNT1	6;2	2.59	0.0062	Polypeptide N-acetylgalactosaminyltransferase 1;Polypeptide N-acetylgalactosaminyltransferase 1 soluble form	GALNT1	6	2.8366	0.00390248
Q7Z7M9	Polypeptide N-acetylgalactosaminyltransferase 5 OS=Homo sapiens OX=9606 GN=GALNT5 PE=1 SV=1	GALNT5	11	3.047	0.01147	Polypeptide N-acetylgalactosaminyltransferase 5	GALNT5	8	2.405	0.0024	Polypeptide N-acetylgalactosaminyltransferase 5	GALNT5	9	2.28204	0.0223967
Q8NCL4	Polypeptide N-acetylgalactosaminyltransferase 6 OS=Homo sapiens OX=9606 GN=GALNT6 PE=1 SV=2	GALNT6	1	0.002	1e+20	Polypeptide N-acetylgalactosaminyltransferase 6	GALNT6		1.0271	0.9328
Q15287	RNA-binding protein with serine-rich domain 1 OS=Homo sapiens OX=9606 GN=RNPS1 PE=1 SV=1	RNPS1	2	1.514	0.05898	RNA-binding protein with serine-rich domain 1	RNPS1		1.216	0.186
Q9HAU5	Regulator of nonsense transcripts 2 OS=Homo sapiens OX=9606 GN=UPF2 PE=1 SV=1	UPF2	3	1.611	0.01072	Regulator of nonsense transcripts 2	UPF2	6;4	0.5057	0.0217	Regulator of nonsense transcripts 2	UPF2	6	0.942299	0.674713
Q53TN4	Plasma membrane ascorbate-dependent reductase CYBRD1 OS=Homo sapiens OX=9606 GN=CYBRD1 PE=1 SV=1	CYBRD1	3	2.049	0.2618
Q9NZI8	Insulin-like growth factor 2 mRNA-binding protein 1 OS=Homo sapiens OX=9606 GN=IGF2BP1 PE=1 SV=2	IGF2BP1	8	4.913	0.001859	Insulin-like growth factor 2 mRNA-binding protein 1	IGF2BP1	8;5	7.3712	0	Insulin-like growth factor 2 mRNA-binding protein 1	IGF2BP1	8	500	1e-20
P52926	High mobility group protein HMGI-C OS=Homo sapiens OX=9606 GN=HMGA2 PE=1 SV=1	HMGA2	1	1.495	0.04109
Q9H2F3	3 beta-hydroxysteroid dehydrogenase type 7 OS=Homo sapiens OX=9606 GN=HSD3B7 PE=1 SV=2	HSD3B7	1	0.625	0.09426	3 beta-hydroxysteroid dehydrogenase type 7	HSD3B7		0.372	0.2905
P33316	Deoxyuridine 5'-triphosphate nucleotidohydrolase, mitochondrial OS=Homo sapiens OX=9606 GN=DUT PE=1 SV=4	DUT	5	1.515	0.01425	Deoxyuridine 5'-triphosphate nucleotidohydrolase, mitochondrial	DUT	5;4;4;4;4;4;3;3;3	1.5414	0.0352	Deoxyuridine 5-triphosphate nucleotidohydrolase, mitochondrial	DUT	5	1.48897	0.0212481
P30041	Peroxiredoxin-6 OS=Homo sapiens OX=9606 GN=PRDX6 PE=1 SV=3	PRDX6	15	0.769	0.004155	Peroxiredoxin-6	PRDX6	15	0.7065	0.0054	Peroxiredoxin-6	PRDX6	15	0.768855	0.0867511
P36776	Lon protease homolog, mitochondrial OS=Homo sapiens OX=9606 GN=LONP1 PE=1 SV=2	LONP1	22	1.39	0.03377	Lon protease homolog, mitochondrial	LONP1		1.4447	0.0014
P26367	Paired box protein Pax-6 OS=Homo sapiens OX=9606 GN=PAX6 PE=1 SV=2	PAX6	1	1.881	0.02278
Q13972	Ras-specific guanine nucleotide-releasing factor 1 OS=Homo sapiens OX=9606 GN=RASGRF1 PE=1 SV=2	RASGRF1	1	500	1e+20
P06865	Beta-hexosaminidase subunit alpha OS=Homo sapiens OX=9606 GN=HEXA PE=1 SV=2	HEXA	13	0.516	0.0003357	Beta-hexosaminidase subunit alpha	HEXA		0.5101	0.0003
P56202	Cathepsin W OS=Homo sapiens OX=9606 GN=CTSW PE=1 SV=2	CTSW	1	4.41	1.908e-05
P34059	N-acetylgalactosamine-6-sulfatase OS=Homo sapiens OX=9606 GN=GALNS PE=1 SV=1	GALNS	5	1.594	0.01485	N-acetylgalactosamine-6-sulfatase	GALNS	5;2	1.4741	0.0057	N-acetylgalactosamine-6-sulfatase	GALNS	5	1.35976	0.184299
Q99538	Legumain OS=Homo sapiens OX=9606 GN=LGMN PE=1 SV=1	LGMN	4	1.287	0.0538	Legumain	LGMN		1.3401	0.2516
O15118	NPC intracellular cholesterol transporter 1 OS=Homo sapiens OX=9606 GN=NPC1 PE=1 SV=2	NPC1	9	0.6	0.003361	NPC intracellular cholesterol transporter 1	NPC1	7;5;5	0.8928	0.201	Niemann-Pick C1 protein	NPC1	7	0.767129	0.0933995
P08962	CD63 antigen OS=Homo sapiens OX=9606 GN=CD63 PE=1 SV=2	CD63	1	0.614	0.01553	CD63 antigen	CD63		0.358	0.0364
P53675	Clathrin heavy chain 2 OS=Homo sapiens OX=9606 GN=CLTCL1 PE=1 SV=2	CLTCL1	18	1.526	0.3025
P04216	Thy-1 membrane glycoprotein OS=Homo sapiens OX=9606 GN=THY1 PE=1 SV=2	THY1	3	0.708	0.01349	Thy-1 membrane glycoprotein	THY1		0.7134	0.0234
P62820	Ras-related protein Rab-1A OS=Homo sapiens OX=9606 GN=RAB1A PE=1 SV=3	RAB1A	10	0.588	0.03515	Ras-related protein Rab-1A	RAB1A	9;6;5;3	0.7079	0.0134	Ras-related protein Rab-1A	RAB1A	9	1.01931	0.942408
Q13642	Four and a half LIM domains protein 1 OS=Homo sapiens OX=9606 GN=FHL1 PE=1 SV=4	FHL1	8	1.32	0.02873	Four and a half LIM domains protein 1	FHL1	8;8;8;7	1.1244	0.4122	Four and a half LIM domains protein 1	FHL1	8	1.27973	0.0289557
Q9BX66	Sorbin and SH3 domain-containing protein 1 OS=Homo sapiens OX=9606 GN=SORBS1 PE=1 SV=3	SORBS1	5	6.28	0.0001784	Sorbin and SH3 domain-containing protein 1	SORBS1	7;6;6;6;6;6;6;6;6;6;5;5;3;1;1	4.2863	0.0001	Sorbin and SH3 domain-containing protein 1	SORBS1	8	1.08971	0.433429
P10644	cAMP-dependent protein kinase type I-alpha regulatory subunit OS=Homo sapiens OX=9606 GN=PRKAR1A PE=1 SV=1	PRKAR1A	16	0.702	0.0001691	cAMP-dependent protein kinase type I-alpha regulatory subunit	PRKAR1A	10;8;6;4;4;4;4;4;3;2	0.7502	0.029	cAMP-dependent protein kinase type I-alpha regulatory subunit;cAMP-dependent protein kinase type I-alpha regulatory subunit, N-terminally processed	PRKAR1A	10	0.680052	0.0380249
O60573	Eukaryotic translation initiation factor 4E type 2 OS=Homo sapiens OX=9606 GN=EIF4E2 PE=1 SV=1	EIF4E2	3	0.395	0.0522
Q9Y6Y0	Influenza virus NS1A-binding protein OS=Homo sapiens OX=9606 GN=IVNS1ABP PE=1 SV=3	IVNS1ABP	4	0.552	0.003904	Influenza virus NS1A-binding protein	IVNS1ABP		0.8604	0.2795
O00291	Huntingtin-interacting protein 1 OS=Homo sapiens OX=9606 GN=HIP1 PE=1 SV=5	HIP1	13	1.218	0.01774	Huntingtin-interacting protein 1	HIP1	10;10;10	1.4915	0.0046	Huntingtin-interacting protein 1	HIP1	10	1.64348	0.00562602
O14561	Acyl carrier protein, mitochondrial OS=Homo sapiens OX=9606 GN=NDUFAB1 PE=1 SV=3	NDUFAB1	1	0.757	0.3097	Acyl carrier protein, mitochondrial	NDUFAB1		1.0821	0.8586
P21980	Protein-glutamine gamma-glutamyltransferase 2 OS=Homo sapiens OX=9606 GN=TGM2 PE=1 SV=2	TGM2	28	0.457	1.885e-07	Protein-glutamine gamma-glutamyltransferase 2	TGM2	19;11;7;7;4	0.4798	0.0001	Protein-glutamine gamma-glutamyltransferase 2	TGM2	19	0.476999	0.00148202
Q92997	Segment polarity protein dishevelled homolog DVL-3 OS=Homo sapiens OX=9606 GN=DVL3 PE=1 SV=2	DVL3	3	0.299		Segment polarity protein dishevelled homolog DVL-3	DVL3		2.3408	0.0235
Q92796	Disks large homolog 3 OS=Homo sapiens OX=9606 GN=DLG3 PE=1 SV=2	DLG3	1	0.655	0.08042
P41221	Protein Wnt-5a OS=Homo sapiens OX=9606 GN=WNT5A PE=1 SV=2	WNT5A	2	0.466	0.2349
P09601	Heme oxygenase 1 OS=Homo sapiens OX=9606 GN=HMOX1 PE=1 SV=1	HMOX1	9	1.575	0.0001439	Heme oxygenase 1	HMOX1	7;6	1.4171	0	Heme oxygenase 1	HMOX1	7	1.56232	0.0110859
P11166	Solute carrier family 2, facilitated glucose transporter member 1 OS=Homo sapiens OX=9606 GN=SLC2A1 PE=1 SV=2	SLC2A1	4	1.401	0.08273	Solute carrier family 2, facilitated glucose transporter member 1	SLC2A1	3;1;1;1	1.0982	0.3439	Solute carrier family 2, facilitated glucose transporter member 1	SLC2A1	3	1.24597	0.0803946
P12004	Proliferating cell nuclear antigen OS=Homo sapiens OX=9606 GN=PCNA PE=1 SV=1	PCNA	8	1.287	0.03213	Proliferating cell nuclear antigen	PCNA	4	1.3665	0.0062	Proliferating cell nuclear antigen	PCNA	4	1.39199	0.154427
Q92466	DNA damage-binding protein 2 OS=Homo sapiens OX=9606 GN=DDB2 PE=1 SV=1	DDB2	1	1.937
P08473	Neprilysin OS=Homo sapiens OX=9606 GN=MME PE=1 SV=2	MME	19	24.063	0.0001072	Neprilysin	MME	10;3;2;2	9.2895	0.0001	Neprilysin	MME	10	500	1e-20
P08174	Complement decay-accelerating factor OS=Homo sapiens OX=9606 GN=CD55 PE=1 SV=4	CD55	4	0.442	0.001995	Complement decay-accelerating factor	CD55		0.5866	0.0311
P32929	Cystathionine gamma-lyase OS=Homo sapiens OX=9606 GN=CTH PE=1 SV=3	CTH	4	0.294	0.000457	Cystathionine gamma-lyase	CTH		0.3381	0
Q16478	Glutamate receptor ionotropic, kainate 5 OS=Homo sapiens OX=9606 GN=GRIK5 PE=2 SV=2	GRIK5	1	1.362	0.2793
Q9H2X9	Solute carrier family 12 member 5 OS=Homo sapiens OX=9606 GN=SLC12A5 PE=1 SV=3	SLC12A5	1	0.606	0.05629
Q9UBE8	Serine/threonine-protein kinase NLK OS=Homo sapiens OX=9606 GN=NLK PE=1 SV=2	NLK	1	0.634	0.001784
P00374	Dihydrofolate reductase OS=Homo sapiens OX=9606 GN=DHFR PE=1 SV=2	DHFR	1	1.584	0.02214
Q7L5N7	Lysophosphatidylcholine acyltransferase 2 OS=Homo sapiens OX=9606 GN=LPCAT2 PE=1 SV=1	LPCAT2	10	2.019	5.815e-05	Lysophosphatidylcholine acyltransferase 2	LPCAT2	4;2;2	1.6978	0.0043	Lysophosphatidylcholine acyltransferase 2	LPCAT2	5	2.02845	0.0011391
Q13451	Peptidyl-prolyl cis-trans isomerase FKBP5 OS=Homo sapiens OX=9606 GN=FKBP5 PE=1 SV=2	FKBP5	1	500	1e+20
Q8NF37	Lysophosphatidylcholine acyltransferase 1 OS=Homo sapiens OX=9606 GN=LPCAT1 PE=1 SV=2	LPCAT1	6	1.181	0.1875	Lysophosphatidylcholine acyltransferase 1	LPCAT1	4;4;3	1.5949	0.0113	Lysophosphatidylcholine acyltransferase 1	LPCAT1	6	1.64287	0.0160355
P19256	Lymphocyte function-associated antigen 3 OS=Homo sapiens OX=9606 GN=CD58 PE=1 SV=1	CD58	1	0.002	1e+20
P56539	Caveolin-3 OS=Homo sapiens OX=9606 GN=CAV3 PE=1 SV=1	CAV3	1	0.755	0.5937
P54652	Heat shock-related 70 kDa protein 2 OS=Homo sapiens OX=9606 GN=HSPA2 PE=1 SV=1	HSPA2	20	2.135	0.0002128	Heat shock-related 70 kDa protein 2	HSPA2	19	1.2519	0.0162	Heat shock-related 70 kDa protein 2	HSPA2	19	1.70249	0.0255976
A5D8V6	Vacuolar protein sorting-associated protein 37C OS=Homo sapiens OX=9606 GN=VPS37C PE=1 SV=2	VPS37C	1	0.002	1e+20	Vacuolar protein sorting-associated protein 37C	VPS37C		0.8844	0.3996
O43150	Arf-GAP with SH3 domain, ANK repeat and PH domain-containing protein 2 OS=Homo sapiens OX=9606 GN=ASAP2 PE=1 SV=3	ASAP2	6	0.477	0.009483	Arf-GAP with SH3 domain, ANK repeat and PH domain-containing protein 2	ASAP2	8;3	0.7093	0.2224	Arf-GAP with SH3 domain, ANK repeat and PH domain-containing protein 2	ASAP2	8	0.513125	0.0131086
P17948	Vascular endothelial growth factor receptor 1 OS=Homo sapiens OX=9606 GN=FLT1 PE=1 SV=2	FLT1	1	0.634	0.001784
P35968	Vascular endothelial growth factor receptor 2 OS=Homo sapiens OX=9606 GN=KDR PE=1 SV=2	KDR	1	0.634	0.001784
P51580	Thiopurine S-methyltransferase OS=Homo sapiens OX=9606 GN=TPMT PE=1 SV=1	TPMT	5	1.712	0.1055	Thiopurine S-methyltransferase	TPMT		2.0166	0.1399
P59768	Guanine nucleotide-binding protein G(I)/G(S)/G(O) subunit gamma-2 OS=Homo sapiens OX=9606 GN=GNG2 PE=1 SV=2	GNG2	1	1.654	0.003657	Guanine nucleotide-binding protein G(I)/G(S)/G(O) subunit gamma-2	GNG2		1.711	0.0106
Q9HAV0	Guanine nucleotide-binding protein subunit beta-4 OS=Homo sapiens OX=9606 GN=GNB4 PE=1 SV=3	GNB4	8	1.812	0.03355	Guanine nucleotide-binding protein subunit beta-4	GNB4	5;2	1.5776	0.0048	Guanine nucleotide-binding protein subunit beta-4	GNB4	5	1.82485	0.014461
P18858	DNA ligase 1 OS=Homo sapiens OX=9606 GN=LIG1 PE=1 SV=1	LIG1	1	1.946	0.02939	DNA ligase 1	LIG1		1.2911	0.3654
P40938	Replication factor C subunit 3 OS=Homo sapiens OX=9606 GN=RFC3 PE=1 SV=2	RFC3	2	2.527		Replication factor C subunit 3	RFC3		2.4659	0.0038
P33993	DNA replication licensing factor MCM7 OS=Homo sapiens OX=9606 GN=MCM7 PE=1 SV=4	MCM7	9	2.053	0.01131	DNA replication licensing factor MCM7	MCM7	9;7;5;2	2.1686	0.0001	DNA replication licensing factor MCM7	MCM7	11	2.07657	0.00123482
P49736	DNA replication licensing factor MCM2 OS=Homo sapiens OX=9606 GN=MCM2 PE=1 SV=4	MCM2	15	1.03	0.7381	DNA replication licensing factor MCM2	MCM2	9;8	2.1245	0.0023	DNA replication licensing factor MCM2	MCM2	9	2.07771	0.00464835
P33992	DNA replication licensing factor MCM5 OS=Homo sapiens OX=9606 GN=MCM5 PE=1 SV=5	MCM5	8	1.344	0.003627	DNA replication licensing factor MCM5	MCM5		1.9937	0
P33991	DNA replication licensing factor MCM4 OS=Homo sapiens OX=9606 GN=MCM4 PE=1 SV=5	MCM4	6	3.652	0.001073	DNA replication licensing factor MCM4	MCM4		1.9257	0.0004
P25205	DNA replication licensing factor MCM3 OS=Homo sapiens OX=9606 GN=MCM3 PE=1 SV=3	MCM3	19	1.618	0.007431	DNA replication licensing factor MCM3	MCM3	11;11;10;1	1.7269	0	DNA replication licensing factor MCM3	MCM3	11	2.16853	0.0067817
P39748	Flap endonuclease 1 OS=Homo sapiens OX=9606 GN=FEN1 PE=1 SV=1	FEN1	6	2.147	0.0005028	Flap endonuclease 1	FEN1	2;1;1;1	1.4854	0.0048	Flap endonuclease 1	FEN1	2	2.06848	0.0124644
P08590	Myosin light chain 3 OS=Homo sapiens OX=9606 GN=MYL3 PE=1 SV=3	MYL3	1	1.028	0.9318
O94760	N(G),N(G)-dimethylarginine dimethylaminohydrolase 1 OS=Homo sapiens OX=9606 GN=DDAH1 PE=1 SV=3	DDAH1	7	0.879	0.2568	N(G),N(G)-dimethylarginine dimethylaminohydrolase 1	DDAH1	6;5;5	0.8558	0.4049	N(G),N(G)-dimethylarginine dimethylaminohydrolase 1	DDAH1	6	0.972866	0.772752
O95865	N(G),N(G)-dimethylarginine dimethylaminohydrolase 2 OS=Homo sapiens OX=9606 GN=DDAH2 PE=1 SV=1	DDAH2	7	0.832	0.007405	N(G),N(G)-dimethylarginine dimethylaminohydrolase 2	DDAH2	5;4;4;4;4	0.8099	0.0461	N(G),N(G)-dimethylarginine dimethylaminohydrolase 2	DDAH2	5	0.998918	0.991382
P35916	Vascular endothelial growth factor receptor 3 OS=Homo sapiens OX=9606 GN=FLT4 PE=1 SV=3	FLT4	1	0.634	0.001784
P05120	Plasminogen activator inhibitor 2 OS=Homo sapiens OX=9606 GN=SERPINB2 PE=1 SV=2	SERPINB2	5	13.866	0.01795	Plasminogen activator inhibitor 2	SERPINB2	4;3;3;1;1;1	9.0382	0.0018	Plasminogen activator inhibitor 2	SERPINB2;SERPINB10	4	500	1e-20
P01023	Alpha-2-macroglobulin OS=Homo sapiens OX=9606 GN=A2M PE=1 SV=3	A2M	12	0.271	0.0006798	Alpha-2-macroglobulin	A2M	6	0.6342	0.0284	Alpha-2-macroglobulin	A2M	7	1.29138	0.0573129
Q9Y6W5	Wiskott-Aldrich syndrome protein family member 2 OS=Homo sapiens OX=9606 GN=WASF2 PE=1 SV=3	WASF2	4	1.685	0.05273	Wiskott-Aldrich syndrome protein family member 2	WASF2	3;1;1;1	1.2394	0.1204	Wiskott-Aldrich syndrome protein family member 2	WASF2	4	1.39849	0.0212974
Q15758	Neutral amino acid transporter B(0) OS=Homo sapiens OX=9606 GN=SLC1A5 PE=1 SV=2	SLC1A5	8	1.253	0.03308	Neutral amino acid transporter B(0)	SLC1A5	6;5;4;4;2;1	1.1245	0.269	Neutral amino acid transporter B(0);Amino acid transporter	SLC1A5	6	1.30717	0.0869515
P09619	Platelet-derived growth factor receptor beta OS=Homo sapiens OX=9606 GN=PDGFRB PE=1 SV=1	PDGFRB	15	0.616	0.006235	Platelet-derived growth factor receptor beta	PDGFRB	12;5;4;4;1	0.6206	0.0016	Platelet-derived growth factor receptor beta	PDGFRB	12	0.722356	0.00825652
P36888	Receptor-type tyrosine-protein kinase FLT3 OS=Homo sapiens OX=9606 GN=FLT3 PE=1 SV=2	FLT3	1	0.634	0.001784
O60216	Double-strand-break repair protein rad21 homolog OS=Homo sapiens OX=9606 GN=RAD21 PE=1 SV=2	RAD21	11	1.596	0.02349	Double-strand-break repair protein rad21 homolog	RAD21	7;2;2;2;2;1;1;1;1;1;1	1.4664	0.012	Double-strand-break repair protein rad21 homolog	RAD21	7	1.5065	0.0743586
O43772	Mitochondrial carnitine/acylcarnitine carrier protein OS=Homo sapiens OX=9606 GN=SLC25A20 PE=1 SV=1	SLC25A20	2	0.641	0.2315	Mitochondrial carnitine/acylcarnitine carrier protein	SLC25A20		0.5268	0.0963
P48163	NADP-dependent malic enzyme OS=Homo sapiens OX=9606 GN=ME1 PE=1 SV=1	ME1	3	500	1e+20	NADP-dependent malic enzyme	ME1		2.6846	0.0078
P11413	Glucose-6-phosphate 1-dehydrogenase OS=Homo sapiens OX=9606 GN=G6PD PE=1 SV=4	G6PD	18	1.263	0.0004031	Glucose-6-phosphate 1-dehydrogenase	G6PD	13;13;13;10;9;8	1.188	0.0092	Glucose-6-phosphate 1-dehydrogenase	G6PD	13	1.28923	0.0705192
P07099	Epoxide hydrolase 1 OS=Homo sapiens OX=9606 GN=EPHX1 PE=1 SV=1	EPHX1	12	2.155	0.002744	Epoxide hydrolase 1	EPHX1	6;1;1	2.4321	0.0021	Epoxide hydrolase 1	EPHX1	6	3.1126	0.00335609
Q9Y6R1	Electrogenic sodium bicarbonate cotransporter 1 OS=Homo sapiens OX=9606 GN=SLC4A4 PE=1 SV=1	SLC4A4	5	0.231	0.001977	Electrogenic sodium bicarbonate cotransporter 1	SLC4A4		1.3493	0.5045
P05026	Sodium/potassium-transporting ATPase subunit beta-1 OS=Homo sapiens OX=9606 GN=ATP1B1 PE=1 SV=1	ATP1B1	5	0.63	0.00107	Sodium/potassium-transporting ATPase subunit beta-1	ATP1B1	4;4;2	0.7087	0.0144	Sodium/potassium-transporting ATPase subunit beta-1	ATP1B1	4	0.557513	0.0203784
Q6PIU2	Neutral cholesterol ester hydrolase 1 OS=Homo sapiens OX=9606 GN=NCEH1 PE=1 SV=3	NCEH1	12	0.508	0.0007833	Neutral cholesterol ester hydrolase 1	NCEH1		0.5441	0.0001
P29972	Aquaporin-1 OS=Homo sapiens OX=9606 GN=AQP1 PE=1 SV=3	AQP1	1	5.645	0.02485
O15438	ATP-binding cassette sub-family C member 3 OS=Homo sapiens OX=9606 GN=ABCC3 PE=1 SV=3	ABCC3	3	1.793	0.001971
P13569	Cystic fibrosis transmembrane conductance regulator OS=Homo sapiens OX=9606 GN=CFTR PE=1 SV=3	CFTR	1	0.002	1e+20
Q14117	Dihydropyrimidinase OS=Homo sapiens OX=9606 GN=DPYS PE=1 SV=1	DPYS	1	0.618	0.005471
P21953	2-oxoisovalerate dehydrogenase subunit beta, mitochondrial OS=Homo sapiens OX=9606 GN=BCKDHB PE=1 SV=2	BCKDHB	3	1.02	0.781	2-oxoisovalerate dehydrogenase subunit beta, mitochondrial	BCKDHB	3;1	1.2119	0.2439	2-oxoisovalerate dehydrogenase subunit beta, mitochondrial	BCKDHB	3	0.917999	0.421968
P12694	2-oxoisovalerate dehydrogenase subunit alpha, mitochondrial OS=Homo sapiens OX=9606 GN=BCKDHA PE=1 SV=2	BCKDHA	2	0.952	0.3209
P27695	DNA-(apurinic or apyrimidinic site) endonuclease OS=Homo sapiens OX=9606 GN=APEX1 PE=1 SV=2	APEX1	15	1.26	0.02876	DNA-(apurinic or apyrimidinic site) endonuclease	APEX1	10;9;9;6;6;5;5;5;4;1	1.531	0.0177	DNA-(apurinic or apyrimidinic site) lyase;DNA-(apurinic or apyrimidinic site) lyase, mitochondrial	APEX1	10	1.56107	0.0608085
P09874	Poly [ADP-ribose] polymerase 1 OS=Homo sapiens OX=9606 GN=PARP1 PE=1 SV=4	PARP1	22	1.527	0.001621	Poly [ADP-ribose] polymerase 1	PARP1	11;1;1	1.4497	0.0014	Poly [ADP-ribose] polymerase 1	PARP1	11	1.53315	0.00145838
P09429	High mobility group protein B1 OS=Homo sapiens OX=9606 GN=HMGB1 PE=1 SV=3	HMGB1	8	1.43	0.0006416	High mobility group protein B1	HMGB1		0.5023	0.5224
P13164	Interferon-induced transmembrane protein 1 OS=Homo sapiens OX=9606 GN=IFITM1 PE=1 SV=3	IFITM1	1	0.704	0.2616
O75094	Slit homolog 3 protein OS=Homo sapiens OX=9606 GN=SLIT3 PE=2 SV=3	SLIT3	16	2.439	6.773e-05	Slit homolog 3 protein	SLIT3	8;8;8;8;5	2.1861	0.0001	Slit homolog 3 protein	SLIT3	8	2.13688	0.0324759
P54760	Ephrin type-B receptor 4 OS=Homo sapiens OX=9606 GN=EPHB4 PE=1 SV=2	EPHB4	4	1.789	0.1605	Ephrin type-B receptor 4	EPHB4		1.9673	0.0068
O75326	Semaphorin-7A OS=Homo sapiens OX=9606 GN=SEMA7A PE=1 SV=1	SEMA7A	20	1.732	0.005638	Semaphorin-7A	SEMA7A	5;4;3	1.4094	0.0004	Semaphorin-7A	SEMA7A	5	1.57704	0.0313401
Q8IZJ1	Netrin receptor UNC5B OS=Homo sapiens OX=9606 GN=UNC5B PE=1 SV=2	UNC5B	3	0.002	1e+20	Netrin receptor UNC5B	UNC5B		0.8482	0.5191
P98172	Ephrin-B1 OS=Homo sapiens OX=9606 GN=EFNB1 PE=1 SV=1	EFNB1	1	0.002	1e+20	Ephrin-B1	EFNB1		0.7282	0.3402
O75051	Plexin-A2 OS=Homo sapiens OX=9606 GN=PLXNA2 PE=1 SV=4	PLXNA2	2	0.524	0.1196	Plexin-A2	PLXNA2		0.4513	0.0086
Q99985	Semaphorin-3C OS=Homo sapiens OX=9606 GN=SEMA3C PE=2 SV=2	SEMA3C	3	0.002	1e+20	Semaphorin-3C	SEMA3C	3	0.3099	0.0049	Semaphorin-3C	SEMA3C	3	0.884489	0.424563
O14639	Actin-binding LIM protein 1 OS=Homo sapiens OX=9606 GN=ABLIM1 PE=1 SV=3	ABLIM1	3	0.339		Actin-binding LIM protein 1	ABLIM1		0.2752	0.0003
O94929	Actin-binding LIM protein 3 OS=Homo sapiens OX=9606 GN=ABLIM3 PE=1 SV=3	ABLIM3	1	500	1e+20
P54753	Ephrin type-B receptor 3 OS=Homo sapiens OX=9606 GN=EPHB3 PE=1 SV=2	EPHB3	3	3.074	0.009982			5;2;2;2;2;2;2			Ephrin type-B receptor 3	EPHB3	5	1.073	0.675466
P05106	Integrin beta-3 OS=Homo sapiens OX=9606 GN=ITGB3 PE=1 SV=2	ITGB3	6	5.733	0.000682	Integrin beta-3	ITGB3		3.9388	0.1197
P17302	Gap junction alpha-1 protein OS=Homo sapiens OX=9606 GN=GJA1 PE=1 SV=2	GJA1	4	0.497	0.0389	Gap junction alpha-1 protein	GJA1		1.011	0.9673
Q13326	Gamma-sarcoglycan OS=Homo sapiens OX=9606 GN=SGCG PE=1 SV=4	SGCG	4	2.103	0.006805	Gamma-sarcoglycan	SGCG		2.4031	0.0006
P18084	Integrin beta-5 OS=Homo sapiens OX=9606 GN=ITGB5 PE=1 SV=1	ITGB5	20	0.749	0.003653	Integrin beta-5	ITGB5	12;5;5;5;4;2;1	0.6045	0.0001	Integrin beta-5	ITGB5	12	0.662375	0.0097035
P17661	Desmin OS=Homo sapiens OX=9606 GN=DES PE=1 SV=3	DES	20	1.082	0.3757	Desmin	DES	14	17.1414	0.0003	Desmin	DES	15	2.23078	0.0115484
P13612	Integrin alpha-4 OS=Homo sapiens OX=9606 GN=ITGA4 PE=1 SV=3	ITGA4	15	2.055	0.048	Integrin alpha-4	ITGA4		2.1743	0
P56199	Integrin alpha-1 OS=Homo sapiens OX=9606 GN=ITGA1 PE=1 SV=2	ITGA1	6	2.035	0.019	Integrin alpha-1	ITGA1	4;1	1.5104	0.0469	Integrin alpha-1	ITGA1	4	1.40785	0.0397642
P23229	Integrin alpha-6 OS=Homo sapiens OX=9606 GN=ITGA6 PE=1 SV=5	ITGA6	6	500	1e+20	Integrin alpha-6	ITGA6	5;5;5;5;5;5;5;3;2	3.8421	0.0039	Integrin alpha-6;Integrin alpha-6 heavy chain;Integrin alpha-6 light chain;Processed integrin alpha-6	ITGA6	5	500	1e-20
P26010	Integrin beta-7 OS=Homo sapiens OX=9606 GN=ITGB7 PE=1 SV=1	ITGB7	1	0.626	0.0685
P15924	Desmoplakin OS=Homo sapiens OX=9606 GN=DSP PE=1 SV=3	DSP	89	0.546	1.179e-05	Desmoplakin	DSP	46;40;39	0.5232	0.0005	Desmoplakin	DSP	47	0.537782	0.000521336
P20700	Lamin-B1 OS=Homo sapiens OX=9606 GN=LMNB1 PE=1 SV=2	LMNB1	23	1.245	0.004636	Lamin-B1	LMNB1		1.486	0.0026
P41219	Peripherin OS=Homo sapiens OX=9606 GN=PRPH PE=1 SV=2	PRPH	7	1.454	0.0324			8;8;6;4			Peripherin	PRPH	8	1.99702	0.0906721
P12036	Neurofilament heavy polypeptide OS=Homo sapiens OX=9606 GN=NEFH PE=1 SV=4	NEFH	1	1.35	0.1317
P02461	Collagen alpha-1(III) chain OS=Homo sapiens OX=9606 GN=COL3A1 PE=1 SV=4	COL3A1	28	1.26	0.002431	Collagen alpha-1(III) chain	COL3A1	21;15	1.4806	0.0011	Collagen alpha-1(III) chain	COL3A1	21	1.52811	0.0127978
P08572	Collagen alpha-2(IV) chain OS=Homo sapiens OX=9606 GN=COL4A2 PE=1 SV=4	COL4A2	3	2.655	0.01867
P05107	Integrin beta-2 OS=Homo sapiens OX=9606 GN=ITGB2 PE=1 SV=2	ITGB2	1	0.626	0.0685
Q6PI48	Aspartate--tRNA ligase, mitochondrial OS=Homo sapiens OX=9606 GN=DARS2 PE=1 SV=1	DARS2	3	1.495	0.05916	Aspartate--tRNA ligase, mitochondrial	DARS2		1.0921	0.2979
Q5T160	Probable arginine--tRNA ligase, mitochondrial OS=Homo sapiens OX=9606 GN=RARS2 PE=1 SV=1	RARS2	1	1.581	0.1393	Probable arginine--tRNA ligase, mitochondrial	RARS2	4	0.8428	0.3151	Probable arginine--tRNA ligase, mitochondrial	RARS2	4	1.05455	0.873874
Q5JTZ9	Alanine--tRNA ligase, mitochondrial OS=Homo sapiens OX=9606 GN=AARS2 PE=1 SV=1	AARS2	1	0.659	0.2574
Q7L3T8	Probable proline--tRNA ligase, mitochondrial OS=Homo sapiens OX=9606 GN=PARS2 PE=1 SV=1	PARS2	1	0.002	1e+20
Q16222	UDP-N-acetylhexosamine pyrophosphorylase OS=Homo sapiens OX=9606 GN=UAP1 PE=1 SV=3	UAP1	21	0.512	0.0001681	UDP-N-acetylhexosamine pyrophosphorylase	UAP1	14;14;14	0.5807	0	UDP-N-acetylhexosamine pyrophosphorylase;UDP-N-acetylgalactosamine pyrophosphorylase;UDP-N-acetylglucosamine pyrophosphorylase	UAP1	14	0.611013	0.0258659
O95197	Reticulon-3 OS=Homo sapiens OX=9606 GN=RTN3 PE=1 SV=2	RTN3	1	0.406	0.001429	Reticulon-3	RTN3		0.435	0.0504
Q99714	3-hydroxyacyl-CoA dehydrogenase type-2 OS=Homo sapiens OX=9606 GN=HSD17B10 PE=1 SV=3	HSD17B10	12	1.348	0.006711	3-hydroxyacyl-CoA dehydrogenase type-2	HSD17B10	9;8;5	1.4271	0.0057	3-hydroxyacyl-CoA dehydrogenase type-2	HSD17B10	9	1.52676	0.039035
O14929	Histone acetyltransferase type B catalytic subunit OS=Homo sapiens OX=9606 GN=HAT1 PE=1 SV=1	HAT1	2	4.515	0.05048	Histone acetyltransferase type B catalytic subunit	HAT1		3.3559	0.026
O94808	Glutamine--fructose-6-phosphate aminotransferase [isomerizing] 2 OS=Homo sapiens OX=9606 GN=GFPT2 PE=1 SV=3	GFPT2	21	0.502	0.0002645	Glutamine--fructose-6-phosphate aminotransferase [isomerizing] 2	GFPT2	14;6	0.6344	0	Glutamine--fructose-6-phosphate aminotransferase [isomerizing] 2	GFPT2	14	0.633608	0.00972715
P13726	Tissue factor OS=Homo sapiens OX=9606 GN=F3 PE=1 SV=1	F3	4	1.94	0.0003557	Tissue factor	F3	4;2	1.7995	0.0147	Tissue factor	F3	6	1.74851	0.000638271
Q8WWI1	LIM domain only protein 7 OS=Homo sapiens OX=9606 GN=LMO7 PE=1 SV=3	LMO7	48	0.722	0.005194	LIM domain only protein 7	LMO7	29;28;28;28;26;26;26	0.7638	0.0305	LIM domain only protein 7	LMO7	29	0.695135	0.011915
Q9Y2D8	Afadin- and alpha-actinin-binding protein OS=Homo sapiens OX=9606 GN=SSX2IP PE=1 SV=3	SSX2IP	1	0.461	0.359
O00425	Insulin-like growth factor 2 mRNA-binding protein 3 OS=Homo sapiens OX=9606 GN=IGF2BP3 PE=1 SV=2	IGF2BP3	10	500	1e+20	Insulin-like growth factor 2 mRNA-binding protein 3	IGF2BP3	5;2;1	16.2909	0.0002	Insulin-like growth factor 2 mRNA-binding protein 3	IGF2BP3	5	500	1e-20
P00352	Retinal dehydrogenase 1 OS=Homo sapiens OX=9606 GN=ALDH1A1 PE=1 SV=2	ALDH1A1	10	4.299	0.0004118	Retinal dehydrogenase 1	ALDH1A1	5;2;2;2	9.3054	0.0008	Retinal dehydrogenase 1	ALDH1A1	5	500	1e-20
P43121	Cell surface glycoprotein MUC18 OS=Homo sapiens OX=9606 GN=MCAM PE=1 SV=2	MCAM	11	24.841	3.706e-07	Cell surface glycoprotein MUC18	MCAM	8;5	9.1699	0	Cell surface glycoprotein MUC18	MCAM	8	1.01595	0.955767
O95864						Acyl-CoA 6-desaturase	FADS2		8.2789	0.0065
Q13884	Beta-1-syntrophin OS=Homo sapiens OX=9606 GN=SNTB1 PE=1 SV=3	SNTB1	4	1.45	0.1374	Beta-1-syntrophin	SNTB1	5;4;3	7.9208	0.0026	Beta-1-syntrophin	SNTB1	5	500	1e-20
Q9Y5S1	Transient receptor potential cation channel subfamily V member 2 OS=Homo sapiens OX=9606 GN=TRPV2 PE=1 SV=1	TRPV2	3	1.646	0.214	Transient receptor potential cation channel subfamily V member 2	TRPV2	5;3;1;1	6.7112	0.0048	Transient receptor potential cation channel subfamily V member 2	TRPV2	5	0.696262	0.105654
Q9BUP0	EF-hand domain-containing protein D1 OS=Homo sapiens OX=9606 GN=EFHD1 PE=1 SV=1	EFHD1	3	500	1e+20	EF-hand domain-containing protein D1	EFHD1		5.448	0.0308
P54821	Paired mesoderm homeobox protein 1 OS=Homo sapiens OX=9606 GN=PRRX1 PE=1 SV=2	PRRX1	4	1.762	0.0002965	Paired mesoderm homeobox protein 1	PRRX1		5.0558	0.0009
P52756	RNA-binding protein 5 OS=Homo sapiens OX=9606 GN=RBM5 PE=1 SV=2	RBM5	4	2.075	0.01927	RNA-binding protein 5	RBM5		4.8757	0.0007
P45973	Chromobox protein homolog 5 OS=Homo sapiens OX=9606 GN=CBX5 PE=1 SV=1	CBX5	4	1.252	0.4418	Chromobox protein homolog 5	CBX5		4.7238	0.1659
Q02539	Histone H1.1 OS=Homo sapiens OX=9606 GN=H1-1 PE=1 SV=3	HIST1H1A	2	1.818	0.1134	Histone H1.1	H1-1		4.2434	0.0073
Q9BZQ8	Protein Niban 1 OS=Homo sapiens OX=9606 GN=NIBAN1 PE=1 SV=1	FAM129A	11	6.222	0.002931	Protein Niban 1	NIBAN1	5;1	3.9553	0.0003	Protein Niban	FAM129A	5	3.15101	0.00300742
P27658	Collagen alpha-1(VIII) chain OS=Homo sapiens OX=9606 GN=COL8A1 PE=1 SV=2	COL8A1	5	4.615	2.681e-05	Collagen alpha-1(VIII) chain	COL8A1	2	3.8588	0.0029	Collagen alpha-1(VIII) chain;Vastatin	COL8A1	4	2.83903	0.00139217
Q4V9L6	Transmembrane protein 119 OS=Homo sapiens OX=9606 GN=TMEM119 PE=1 SV=1	TMEM119	3	2.648	0.06258	Transmembrane protein 119	TMEM119		3.7776	0.0037
Q4V339	COBW domain-containing protein 6 OS=Homo sapiens OX=9606 GN=CBWD6 PE=3 SV=1	CBWD6	3	0.88	0.6524	COBW domain-containing protein 6;COBW domain-containing protein 3;COBW domain-containing protein 5;COBW domain-containing protein 1	CBWD6;CBWD3;CBWD5;CBWD1		3.6777	0.0062
ENSEMBL:ENSBTAP00000025008						taurus) hypothetical protein;Tubulin beta-1 chain	(Bos;TUBB1		3.6154	0.1108
P15502	Elastin OS=Homo sapiens OX=9606 GN=ELN PE=1 SV=4		3	2.138		Elastin	ELN	2;2;2;2;2;2;2;2;2;2;2;2;2;2;2;2;1;1;1;0;0	3.5605	0.0008	Elastin	ELN	3
Q16678						Cytochrome P450 1B1	CYP1B1		3.5393	0.0466
Q53SF7	Cordon-bleu protein-like 1 OS=Homo sapiens OX=9606 GN=COBLL1 PE=1 SV=3		2	500	1e+20	Cordon-bleu protein-like 1	COBLL1		3.5198	0.0002
O15344						E3 ubiquitin-protein ligase Midline-1	MID1		3.4991	0.0597
Q9HCD5	Nuclear receptor coactivator 5 OS=Homo sapiens OX=9606 GN=NCOA5 PE=1 SV=2	NCOA5	3	2.715	0.02065	Nuclear receptor coactivator 5	NCOA5		3.4608	0.0354
A5PLL7	Plasmanylethanolamine desaturase OS=Homo sapiens OX=9606 GN=PEDS1 PE=1 SV=3	TMEM189; TMEM189-UBE2V1	3	0.987	0.958	Plasmanylethanolamine desaturase	PEDS1		3.4177	0.1984
P24821	Tenascin OS=Homo sapiens OX=9606 GN=TNC PE=1 SV=3	TNC	45	3.301	1.017e-06	Tenascin	TNC	29;25	3.3776	0	Tenascin	TNC	32	3.38397	0.00293348
P02462						Collagen alpha-1(IV) chain	COL4A1	4;1;1	3.37	0.0002	Collagen alpha-1(IV) chain;Arresten	COL4A1	4	1.38152	0.0105536
P15559	NAD(P)H dehydrogenase [quinone] 1 OS=Homo sapiens OX=9606 GN=NQO1 PE=1 SV=1	NQO1	7	3.861	6.305e-08	NAD(P)H dehydrogenase [quinone] 1	NQO1		3.3468	0.0048
P62328						Thymosin beta-4	TMSB4X		3.3412	0.1033
Q8WZ42	Titin OS=Homo sapiens OX=9606 GN=TTN PE=1 SV=4	TTN	8	1.029	0.7391	Titin	TTN		3.3009	0.245
Q5UIP0						Telomere-associated protein RIF1	RIF1		3.2817	0.0058
Q13683						Integrin alpha-7	ITGA7		3.2736	0.0063
Q92522	Histone H1.10 OS=Homo sapiens OX=9606 GN=H1-10 PE=1 SV=1	H1FX	3	2.352	0.003491	Histone H1.10	H1-10		3.1885	0.0038
P35442	Thrombospondin-2 OS=Homo sapiens OX=9606 GN=THBS2 PE=1 SV=2	THBS2	9	2.104	0.05431	Thrombospondin-2	THBS2	9;9;2	3.1805	0	Thrombospondin-2	THBS2	9	2.80417	0.00173961
Q14934	Nuclear factor of activated T-cells, cytoplasmic 4 OS=Homo sapiens OX=9606 GN=NFATC4 PE=1 SV=2	NFATC4	4	1.617	0.3594	Nuclear factor of activated T-cells, cytoplasmic 4	NFATC4		3.1443	0.0039
P16402	Histone H1.3 OS=Homo sapiens OX=9606 GN=H1-3 PE=1 SV=2	HIST1H1D	4	1.587	0.003016	Histone H1.3	H1-3		3.1309	0.0014
O75953						DnaJ homolog subfamily B member 5	DNAJB5		3.1209	0.0022
P17677	Neuromodulin OS=Homo sapiens OX=9606 GN=GAP43 PE=1 SV=1	GAP43	2	2.38	0.3798	Neuromodulin	GAP43		3.0784	0.0003
Q15238	Pregnancy-specific beta-1-glycoprotein 5 OS=Homo sapiens OX=9606 GN=PSG5 PE=1 SV=3	PSG5	3	1.038	0.841	Pregnancy-specific beta-1-glycoprotein 5	PSG5		2.9975	0.0032
Q8N6M0	Deubiquitinase OTUD6B OS=Homo sapiens OX=9606 GN=OTUD6B PE=1 SV=1	OTUD6B	2	0.696	0.2885	Deubiquitinase OTUD6B	OTUD6B		2.902	0.0199
P10412	Histone H1.4 OS=Homo sapiens OX=9606 GN=H1-4 PE=1 SV=2	HIST1H1E	4	1.587	0.003016	Histone H1.4	H1-4		2.8776	0.1005
P51911	Calponin-1 OS=Homo sapiens OX=9606 GN=CNN1 PE=1 SV=2	CNN1	7	2.694	2.235e-05	Calponin-1	CNN1	4;4;2;2;1;1;1;1	2.8478	0	Calponin-1;Calponin	CNN1	4	2.9153	0.00363132
P61601						Neurocalcin-delta	NCALD		2.8219	0.0013
Q96CG8	Collagen triple helix repeat-containing protein 1 OS=Homo sapiens OX=9606 GN=CTHRC1 PE=1 SV=1	CTHRC1	7	2.764	0.0005298	Collagen triple helix repeat-containing protein 1	CTHRC1	5;5;4;3;2	2.7945	0.0127	Collagen triple helix repeat-containing protein 1	CTHRC1	5	3.14996	0.00544491
Q96FV9	THO complex subunit 1 OS=Homo sapiens OX=9606 GN=THOC1 PE=1 SV=1	THOC1	2	1.72	0.1865	THO complex subunit 1	THOC1		2.785	0.0028
Q00534	Cyclin-dependent kinase 6 OS=Homo sapiens OX=9606 GN=CDK6 PE=1 SV=1	CDK6	3	0.955	0.8947	Cyclin-dependent kinase 6	CDK6		2.6876	0.0229
Q5K4L6	Solute carrier family 27 member 3 OS=Homo sapiens OX=9606 GN=SLC27A3 PE=1 SV=4		2	1.717	0.2158	Solute carrier family 27 member 3	SLC27A3		2.6457	0.0567
A7E2V4						Zinc finger SWIM domain-containing protein 8	ZSWIM8		2.6447	0.0485
P26012						Integrin beta-8	ITGB8		2.6348	0.0026
Q96PZ0	Pseudouridylate synthase 7 homolog OS=Homo sapiens OX=9606 GN=PUS7 PE=1 SV=2	PUS7	6	1.423	0.06337	Pseudouridylate synthase 7 homolog	PUS7		2.628	0.006
Q6ZMZ3						Nesprin-3	SYNE3		2.4582	0.0419
Q04724	Transducin-like enhancer protein 1 OS=Homo sapiens OX=9606 GN=TLE1 PE=1 SV=2	TLE1	2	1.257	0.4504	Transducin-like enhancer protein 1;Transducin-like enhancer protein 2;Transducin-like enhancer protein 3;Transducin-like enhancer protein 4	TLE1;TLE2;TLE3;TLE4		2.4107	0.0037
Q9HD67	Unconventional myosin-X OS=Homo sapiens OX=9606 GN=MYO10 PE=1 SV=3	MYO10	4	3.386	0.1111	Unconventional myosin-X	MYO10		2.4053	0.0459
Q8NB90	ATPase family protein 2 homolog OS=Homo sapiens OX=9606 GN=SPATA5 PE=1 SV=3	SPATA5	5	1.333	0.2271	ATPase family protein 2 homolog	SPATA5		2.3965	0.0127
Q15102	Platelet-activating factor acetylhydrolase IB subunit alpha1 OS=Homo sapiens OX=9606 GN=PAFAH1B3 PE=1 SV=1	PAFAH1B3	3	1.02	0.9256	Platelet-activating factor acetylhydrolase IB subunit alpha1	PAFAH1B3		2.3898	0.0366
Q68CQ4	U3 small nucleolar RNA-associated protein 25 homolog OS=Homo sapiens OX=9606 GN=UTP25 PE=1 SV=2	DIEXF	2	1.061	0.6257	Digestive organ expansion factor homolog	DIEXF		2.3881	0.0156
Q9Y315	Deoxyribose-phosphate aldolase OS=Homo sapiens OX=9606 GN=DERA PE=1 SV=2	DERA	9	1.101	0.3665	Deoxyribose-phosphate aldolase	DERA		2.379	0.0002
Q8NEM2	SHC SH2 domain-binding protein 1 OS=Homo sapiens OX=9606 GN=SHCBP1 PE=1 SV=3	SHCBP1	1	1.112	0.6908	SHC SH2 domain-binding protein 1	SHCBP1		2.3678	0.0025
Q07092	Collagen alpha-1(XVI) chain OS=Homo sapiens OX=9606 GN=COL16A1 PE=1 SV=2	COL16A1	3	2.324	0.06935	Collagen alpha-1(XVI) chain	COL16A1	3;3;2	2.3616	0.0008	Collagen alpha-1(XVI) chain	COL16A1	4	1.13693	0.440889
Q9H2G4						Testis-specific Y-encoded-like protein 2	TSPYL2		2.3612	0.387
Q9UHR5						SAP30-binding protein	SAP30BP		2.3566	0.2111
O95707						Ribonuclease P protein subunit p29	POP4		2.3548	0.0221
O00767						Stearoyl-CoA desaturase	SCD		2.3523	0.0228
Q9UEW8	STE20/SPS1-related proline-alanine-rich protein kinase OS=Homo sapiens OX=9606 GN=STK39 PE=1 SV=3	STK39	5	0.933	0.7484	STE20/SPS1-related proline-alanine-rich protein kinase	STK39	3;3	2.3349	0.0024	STE20/SPS1-related proline-alanine-rich protein kinase	STK39	3	1.51997	0.015846
P11169	Solute carrier family 2, facilitated glucose transporter member 3 OS=Homo sapiens OX=9606 GN=SLC2A3 PE=1 SV=1	SLC2A3	2	1.332	0.5235	Solute carrier family 2, facilitated glucose transporter member 3;Solute carrier family 2, facilitated glucose transporter member 14	SLC2A3;SLC2A14		2.3116	0.0217
O95528	Solute carrier family 2, facilitated glucose transporter member 10 OS=Homo sapiens OX=9606 GN=SLC2A10 PE=1 SV=2	SLC2A10	2	0.83	0.4406	Solute carrier family 2, facilitated glucose transporter member 10	SLC2A10		2.3106	0.0529
Q15370	Elongin-B OS=Homo sapiens OX=9606 GN=ELOB PE=1 SV=1	TCEB2; ELOB	5	1.049	0.5896	Elongin-B	ELOB		2.2963	0.0453
P0DI83						Ras-related protein Rab-34, isoform NARR	RAB34		2.2962	0.0988
Q6F5E8	Capping protein, Arp2/3 and myosin-I linker protein 2 OS=Homo sapiens OX=9606 GN=CARMIL2 PE=1 SV=2	RLTPR; CARMIL2	1	1.038	0.682	Capping protein, Arp2/3 and myosin-I linker protein 2	CARMIL2		2.2863	0.245
Q02952	A-kinase anchor protein 12 OS=Homo sapiens OX=9606 GN=AKAP12 PE=1 SV=4	AKAP12	13	2.811	0.08333	A-kinase anchor protein 12	AKAP12		2.2749	0.0367
Q08357	Sodium-dependent phosphate transporter 2 OS=Homo sapiens OX=9606 GN=SLC20A2 PE=1 SV=1	SLC20A2	2	1.099	0.6883	Sodium-dependent phosphate transporter 2	SLC20A2		2.2723	0.0477
Q9BRB3						Phosphatidylinositol N-acetylglucosaminyltransferase subunit Q	PIGQ		2.2608	0.0012
P12882	Myosin-1 OS=Homo sapiens OX=9606 GN=MYH1 PE=1 SV=3	MYH1	2	1.436		Myosin-1;Myosin-7;Myosin-6;Myosin-8;Myosin-2;Myosin-4	MYH1;MYH7;MYH6;MYH8;MYH2;MYH4		2.2587	0.5089
Q96CX2	BTB/POZ domain-containing protein KCTD12 OS=Homo sapiens OX=9606 GN=KCTD12 PE=1 SV=1	KCTD12	10	2.472	0.000145	BTB/POZ domain-containing protein KCTD12	KCTD12	8	2.2574	0.0001	BTB/POZ domain-containing protein KCTD12	KCTD12	8	2.44962	4.14e-06
Q4G0J3	La-related protein 7 OS=Homo sapiens OX=9606 GN=LARP7 PE=1 SV=1	LARP7	8	1.222	0.07858	La-related protein 7	LARP7		2.2561	0.0076
Q969E4	Transcription elongation factor A protein-like 3 OS=Homo sapiens OX=9606 GN=TCEAL3 PE=1 SV=1	TCEAL3	1	1.413	0.07652	Transcription elongation factor A protein-like 3	TCEAL3	2;1;1	2.253	0.0493	Transcription elongation factor A protein-like 3;Transcription elongation factor A protein-like 6	TCEAL3;TCEAL6	2	0.349027	0.506394
P35612	Beta-adducin OS=Homo sapiens OX=9606 GN=ADD2 PE=1 SV=3	ADD2	3	1.131		Beta-adducin	ADD2		2.2469	0.0191
Q9C0E8	Endoplasmic reticulum junction formation protein lunapark OS=Homo sapiens OX=9606 GN=LNPK PE=1 SV=2	KIAA1715; LNPK	8	1.877	0.0001542	Endoplasmic reticulum junction formation protein lunapark	LNPK	8;8;8;5;3;2	2.2345	0	Protein lunapark	LNP	8	2.06559	0.0116419
O60565						Gremlin-1	GREM1		2.233	0.0136
P41226						Ubiquitin-like modifier-activating enzyme 7	UBA7		2.2325	0.0268
P78563	Double-stranded RNA-specific editase 1 OS=Homo sapiens OX=9606 GN=ADARB1 PE=1 SV=1	ADARB1	4	3.741	0.001767	Double-stranded RNA-specific editase 1	ADARB1		2.2314	0.0052
O43184						Disintegrin and metalloproteinase domain-containing protein 12	ADAM12		2.229	0.0039
Q96T88	E3 ubiquitin-protein ligase UHRF1 OS=Homo sapiens OX=9606 GN=UHRF1 PE=1 SV=1	UHRF1	2	0.936	0.7079	E3 ubiquitin-protein ligase UHRF1	UHRF1		2.2223	0.0103
Q96IP4	Terminal nucleotidyltransferase 5A OS=Homo sapiens OX=9606 GN=TENT5A PE=1 SV=2	FAM46A	3	0.934	0.5673	Terminal nucleotidyltransferase 5A	TENT5A		2.2128	0.1149
O14558	Heat shock protein beta-6 OS=Homo sapiens OX=9606 GN=HSPB6 PE=1 SV=2	HSPB6	7	2.413	1.486e-07	Heat shock protein beta-6	HSPB6		2.2127	0.0001
Q8IZ83	Aldehyde dehydrogenase family 16 member A1 OS=Homo sapiens OX=9606 GN=ALDH16A1 PE=1 SV=2	ALDH16A1	7	1.828	0.01914	Aldehyde dehydrogenase family 16 member A1	ALDH16A1		2.1983	0
Q14566	DNA replication licensing factor MCM6 OS=Homo sapiens OX=9606 GN=MCM6 PE=1 SV=1	MCM6	10	1.258	0.09984	DNA replication licensing factor MCM6	MCM6	7	2.1919	0.0002	DNA replication licensing factor MCM6	MCM6	7	1.73046	0.0061897
Q96EK7	Constitutive coactivator of peroxisome proliferator-activated receptor gamma OS=Homo sapiens OX=9606 GN=FAM120B PE=1 SV=1	FAM120B	6	0.852	0.3752	Constitutive coactivator of peroxisome proliferator-activated receptor gamma	FAM120B		2.1862	0.0149
P61587	Rho-related GTP-binding protein RhoE OS=Homo sapiens OX=9606 GN=RND3 PE=1 SV=1	RND3	3	1.839	0.01872	Rho-related GTP-binding protein RhoE	RND3		2.1823	0.0016
Q8WXX5	DnaJ homolog subfamily C member 9 OS=Homo sapiens OX=9606 GN=DNAJC9 PE=1 SV=1	DNAJC9	4	2.017	0.04092	DnaJ homolog subfamily C member 9	DNAJC9	3	2.1766	0.001	DnaJ homolog subfamily C member 9	DNAJC9	3	1.60204	0.0261522
Q96JP5						E3 ubiquitin-protein ligase ZFP91	ZFP91		2.1737	0.3049
O75818						Ribonuclease P protein subunit p40	RPP40		2.1641	0.0254
Q92759	General transcription factor IIH subunit 4 OS=Homo sapiens OX=9606 GN=GTF2H4 PE=1 SV=1	GTF2H4	1	1.2	0.1922	General transcription factor IIH subunit 4	GTF2H4		2.1578	0.0433
Q5T9L3						Protein wntless homolog	WLS		2.151	0.004
Q96EF6						F-box only protein 17	FBXO17		2.1508	0.0554
Q13243	Serine/arginine-rich splicing factor 5 OS=Homo sapiens OX=9606 GN=SRSF5 PE=1 SV=1	SRSF5	3	1.163	0.673	Serine/arginine-rich splicing factor 5	SRSF5		2.1506	0.0765
P54803						Galactocerebrosidase	GALC		2.1482	0.0085
O43823						A-kinase anchor protein 8	AKAP8		2.1475	0.0006
Q9HCN4						GPN-loop GTPase 1	GPN1		2.1446	0.2238
Q9NVV4						Poly(A) RNA polymerase, mitochondrial	MTPAP		2.1404	0.0255
P29536	Leiomodin-1 OS=Homo sapiens OX=9606 GN=LMOD1 PE=1 SV=3	LMOD1	5	2.298	0.01402	Leiomodin-1	LMOD1		2.1383	0.0944
Q7L273	BTB/POZ domain-containing protein KCTD9 OS=Homo sapiens OX=9606 GN=KCTD9 PE=1 SV=1	KCTD9	3	0.715	0.05035	BTB/POZ domain-containing protein KCTD9	KCTD9	4;2;2	2.1333	0.2184	BTB/POZ domain-containing protein KCTD9	KCTD9	4	1.04063	0.797897
Q14435						Polypeptide N-acetylgalactosaminyltransferase 3	GALNT3		2.1308	0.0092
Q96CP6						Protein Aster-A	GRAMD1A		2.1248	0.0038
Q92845	Kinesin-associated protein 3 OS=Homo sapiens OX=9606 GN=KIFAP3 PE=1 SV=2	KIFAP3	3	0.572	0.08583	Kinesin-associated protein 3	KIFAP3		2.1155	0.0494
Q9Y680	Peptidyl-prolyl cis-trans isomerase FKBP7 OS=Homo sapiens OX=9606 GN=FKBP7 PE=1 SV=2		2	0.861	0.145	Peptidyl-prolyl cis-trans isomerase FKBP7	FKBP7	3;3;1;1;1	2.1117	0.0425	Peptidyl-prolyl cis-trans isomerase FKBP7	FKBP7	3	1.1174	0.316181
Q00613						Heat shock factor protein 1	HSF1		2.1117	0.0777
Q01628	Interferon-induced transmembrane protein 3 OS=Homo sapiens OX=9606 GN=IFITM3 PE=1 SV=2	IFITM3	2	1.439	0.0038	Interferon-induced transmembrane protein 3	IFITM3		2.1065	0
A0A024RBG1	Diphosphoinositol polyphosphate phosphohydrolase NUDT4B OS=Homo sapiens OX=9606 GN=NUDT4B PE=3 SV=1	NUDT4; NUDT4P1; NUDT4B	1	1.659	0.02631	Diphosphoinositol polyphosphate phosphohydrolase NUDT4B;Diphosphoinositol polyphosphate phosphohydrolase 2	NUDT4B;NUDT4		2.1064	0.0028
Q8TCF1						AN1-type zinc finger protein 1	ZFAND1		2.0988	0.0429
P04114	Apolipoprotein B-100 OS=Homo sapiens OX=9606 GN=APOB PE=1 SV=2	APOB	5	1.032	0.7799	Apolipoprotein B-100	APOB	5;2	2.0934	0.0158	Apolipoprotein B-100;Apolipoprotein B-48	APOB	5	1.41275	0.0690254
P62854	40S ribosomal protein S26 OS=Homo sapiens OX=9606 GN=RPS26 PE=1 SV=3	RPS26; LOC101929876; RPS26P25	3	0.914	0.4842	40S ribosomal protein S26	RPS26	2	2.0923	0.0108	40S ribosomal protein S26	RPS26	2	1.15315	0.488387
Q08431	Lactadherin OS=Homo sapiens OX=9606 GN=MFGE8 PE=1 SV=3		8	3.018	0.00287	Lactadherin	MFGE8		2.0907	0.0001
P98179	RNA-binding protein 3 OS=Homo sapiens OX=9606 GN=RBM3 PE=1 SV=1	RBM3	2	1.025	0.9348	RNA-binding protein 3	RBM3		2.0875	0.131
Q8IUR5						Protein O-mannosyl-transferase TMTC1	TMTC1		2.085	0.1406
Q9UK59	Lariat debranching enzyme OS=Homo sapiens OX=9606 GN=DBR1 PE=1 SV=2	DBR1	3	1.649	0.008872	Lariat debranching enzyme	DBR1		2.0819	0.0261
Q8IZ69	tRNA (uracil-5-)-methyltransferase homolog A OS=Homo sapiens OX=9606 GN=TRMT2A PE=1 SV=2	TRMT2A	3	1.753	0.08467	tRNA (uracil-5-)-methyltransferase homolog A	TRMT2A		2.0804	0.0634
P02511	Alpha-crystallin B chain OS=Homo sapiens OX=9606 GN=CRYAB PE=1 SV=2	CRYAB	11	1.986	0.0003137	Alpha-crystallin B chain	CRYAB		2.0798	0.007
Q9NW64	Pre-mRNA-splicing factor RBM22 OS=Homo sapiens OX=9606 GN=RBM22 PE=1 SV=1	RBM22	4	1.319	0.3346	Pre-mRNA-splicing factor RBM22	RBM22		2.0767	0.002
Q12824	SWI/SNF-related matrix-associated actin-dependent regulator of chromatin subfamily B member 1 OS=Homo sapiens OX=9606 GN=SMARCB1 PE=1 SV=2	SMARCB1	2	2.206	0.005454	SWI/SNF-related matrix-associated actin-dependent regulator of chromatin subfamily B member 1	SMARCB1		2.0748	0.0045
Q9BQ52	Zinc phosphodiesterase ELAC protein 2 OS=Homo sapiens OX=9606 GN=ELAC2 PE=1 SV=2	ELAC2	3	1.507	0.08277	Zinc phosphodiesterase ELAC protein 2	ELAC2		2.0713	0.0123
O75586						Mediator of RNA polymerase II transcription subunit 6	MED6		2.0696	0.1358
P0DN76						Splicing factor U2AF 35 kDa subunit-like protein;Splicing factor U2AF 35 kDa subunit	U2AF1L5;U2AF1		2.0614	0.2027
Q13868	Exosome complex component RRP4 OS=Homo sapiens OX=9606 GN=EXOSC2 PE=1 SV=2	EXOSC2	7	1.561	0.04427	Exosome complex component RRP4	EXOSC2	3;3;2;2;2;1	2.055	0.0213	Exosome complex component RRP4	EXOSC2	3	1.88624	0.0457343
Q8TCZ2	CD99 antigen-like protein 2 OS=Homo sapiens OX=9606 GN=CD99L2 PE=1 SV=1	CD99L2	2	0.677	0.06988	CD99 antigen-like protein 2	CD99L2		2.0426	0.0837
P27448	MAP/microtubule affinity-regulating kinase 3 OS=Homo sapiens OX=9606 GN=MARK3 PE=1 SV=5		5	0.899	0.7665	MAP/microtubule affinity-regulating kinase 3	MARK3		2.0308	0.1272
Q8IVB5						LIX1-like protein	LIX1L		2.0256	0.0325
P62861	40S ribosomal protein S30 OS=Homo sapiens OX=9606 GN=FAU PE=1 SV=1	FAU	1	0.975	0.7202	40S ribosomal protein S30	FAU		2.0225	0.0323
Q5JPI3						Uncharacterized protein C3orf38	C3orf38		2.0224	0.0235
Q9Y6F6						Inositol 1,4,5-triphosphate receptor associated 1	IRAG1		2.0138	0.0777
Q9BXY0	Protein MAK16 homolog OS=Homo sapiens OX=9606 GN=MAK16 PE=1 SV=2	MAK16	2	1.203	0.3188	Protein MAK16 homolog	MAK16		2.0115	0.0669
O95361						Tripartite motif-containing protein 16	TRIM16		2.0076	0.0168
Q9Y5J1	U3 small nucleolar RNA-associated protein 18 homolog OS=Homo sapiens OX=9606 GN=UTP18 PE=1 SV=3	UTP18	3	1.2	0.1801	U3 small nucleolar RNA-associated protein 18 homolog	UTP18		2.0033	0.3402
O75911	Short-chain dehydrogenase/reductase 3 OS=Homo sapiens OX=9606 GN=DHRS3 PE=1 SV=2	DHRS3	4	2.488	0.01319	Short-chain dehydrogenase/reductase 3	DHRS3	3;1;1	2.0032	0.1108	Short-chain dehydrogenase/reductase 3	DHRS3	3	1.6018	0.0109571
Q5JSL3						Dedicator of cytokinesis protein 11	DOCK11		2.0024	0.0977
Q6GYQ0	Ral GTPase-activating protein subunit alpha-1 OS=Homo sapiens OX=9606 GN=RALGAPA1 PE=1 SV=1	RALGAPA1	1	0.737	0.1699	Ral GTPase-activating protein subunit alpha-1	RALGAPA1		2.0006	0.1119
Q3KR37						Protein Aster-B	GRAMD1B		1.9998	0.0099
Q13308	Inactive tyrosine-protein kinase 7 OS=Homo sapiens OX=9606 GN=PTK7 PE=1 SV=2	PTK7	22	1.99	1.274e-05	Inactive tyrosine-protein kinase 7	PTK7	16;16;15;14;13;11;7;5;4;3;2	1.9966	0.0003	Inactive tyrosine-protein kinase 7	PTK7	16	2.35849	0.000733847
Q9Y4F1	FERM, ARHGEF and pleckstrin domain-containing protein 1 OS=Homo sapiens OX=9606 GN=FARP1 PE=1 SV=1	FARP1	16	2.262	0.001131	FERM, ARHGEF and pleckstrin domain-containing protein 1	FARP1	11;9;9;5;4;3;3;1;1	1.9937	0.0004	FERM, RhoGEF and pleckstrin domain-containing protein 1	FARP1	11	2.02387	0.00162726
O15355	Protein phosphatase 1G OS=Homo sapiens OX=9606 GN=PPM1G PE=1 SV=1	PPM1G	6	0.938	0.7578	Protein phosphatase 1G	PPM1G	3	1.9917	0.2115	Protein phosphatase 1G	PPM1G	3	1.69246	0.118004
Q9Y2C2	Uronyl 2-sulfotransferase OS=Homo sapiens OX=9606 GN=UST PE=2 SV=1	UST	1	1.234	0.5786	Uronyl 2-sulfotransferase	UST		1.9904	0.0317
P29558	RNA-binding motif, single-stranded-interacting protein 1 OS=Homo sapiens OX=9606 GN=RBMS1 PE=1 SV=3	RBMS1	2	1.726	0.001901	RNA-binding motif, single-stranded-interacting protein 1	RBMS1		1.9864	0.0001
Q99755	Phosphatidylinositol 4-phosphate 5-kinase type-1 alpha OS=Homo sapiens OX=9606 GN=PIP5K1A PE=1 SV=1	PIP5K1A	6	1.15	0.3309	Phosphatidylinositol 4-phosphate 5-kinase type-1 alpha	PIP5K1A		1.9863	0.0106
Q8IUR0	Trafficking protein particle complex subunit 5 OS=Homo sapiens OX=9606 GN=TRAPPC5 PE=1 SV=1	TRAPPC5	5	2.164	0.08423	Trafficking protein particle complex subunit 5	TRAPPC5		1.9698	0.0462
Q9Y5Q8	General transcription factor 3C polypeptide 5 OS=Homo sapiens OX=9606 GN=GTF3C5 PE=1 SV=2	GTF3C5	3	1.635	0.0007026	General transcription factor 3C polypeptide 5	GTF3C5		1.9626	0.0007
Q9HAT2	Sialate O-acetylesterase OS=Homo sapiens OX=9606 GN=SIAE PE=1 SV=1	SIAE	2	1.165	0.3298	Sialate O-acetylesterase	SIAE		1.9624	0.0134
Q6UVY6	DBH-like monooxygenase protein 1 OS=Homo sapiens OX=9606 GN=MOXD1 PE=1 SV=1	MOXD1	6	1.297	0.01063	DBH-like monooxygenase protein 1	MOXD1	5;5	1.9554	0.0001	DBH-like monooxygenase protein 1	MOXD1	6	1.71514	0.00647089
Q00978						Interferon regulatory factor 9	IRF9		1.949	0.0213
Q13427	Peptidyl-prolyl cis-trans isomerase G OS=Homo sapiens OX=9606 GN=PPIG PE=1 SV=2	PPIG	1	0.858	0.8447	Peptidyl-prolyl cis-trans isomerase G	PPIG		1.944	0
P84243	Histone H3.3 OS=Homo sapiens OX=9606 GN=H3-3A PE=1 SV=2	H3F3A; H3F3AP4; H3F3B	6	0.962	0.9239	Histone H3.3	H3-3A		1.9388	0.0551
Q9UJY5	ADP-ribosylation factor-binding protein GGA1 OS=Homo sapiens OX=9606 GN=GGA1 PE=1 SV=1	GGA1	3	0.687	0.3986	ADP-ribosylation factor-binding protein GGA1	GGA1		1.923	0.2753
Q8TDZ2	[F-actin]-monooxygenase MICAL1 OS=Homo sapiens OX=9606 GN=MICAL1 PE=1 SV=2	MICAL1	15	1.203	0.3962	[F-actin]-monooxygenase MICAL1	MICAL1	11;11;10;3;2;2	1.9205	0.0023	Protein-methionine sulfoxide oxidase MICAL1	MICAL1	11	1.83709	0.00343914
Q8WUH1	Protein Churchill OS=Homo sapiens OX=9606 GN=CHURC1 PE=1 SV=2	CHURC1	1	1.011	0.9325	Protein Churchill	CHURC1		1.9155	0.0046
P53634	Dipeptidyl peptidase 1 OS=Homo sapiens OX=9606 GN=CTSC PE=1 SV=2	CTSC	2	1.927	0.3814	Dipeptidyl peptidase 1	CTSC		1.9135	0.0447
O00255						Menin	MEN1		1.911	0.0099
Q9NVA4	Transmembrane protein 184C OS=Homo sapiens OX=9606 GN=TMEM184C PE=1 SV=2	TMEM184C	1	0.91	0.6421	Transmembrane protein 184C	TMEM184C		1.9108	0.4312
P18074	General transcription and DNA repair factor IIH helicase subunit XPD OS=Homo sapiens OX=9606 GN=ERCC2 PE=1 SV=1	ERCC2	3	1.218	0.6933	General transcription and DNA repair factor IIH helicase subunit XPD	ERCC2		1.906	0.0065
P51531	Probable global transcription activator SNF2L2 OS=Homo sapiens OX=9606 GN=SMARCA2 PE=1 SV=2	SMARCA2	7	1.533	0.3843	Probable global transcription activator SNF2L2	SMARCA2		1.9014	0.0004
Q6PCE3	Glucose 1,6-bisphosphate synthase OS=Homo sapiens OX=9606 GN=PGM2L1 PE=1 SV=3	PGM2L1	6	1.293	0.033	Glucose 1,6-bisphosphate synthase	PGM2L1	7	1.8944	0	Glucose 1,6-bisphosphate synthase	PGM2L1	7	1.41845	0.00141033
A8MWD9	Putative small nuclear ribonucleoprotein G-like protein 15 OS=Homo sapiens OX=9606 GN=SNRPGP15 PE=5 SV=2	LOC100130932; SNRPGP15	1	1.256	0.007711	Putative small nuclear ribonucleoprotein G-like protein 15;Small nuclear ribonucleoprotein G	SNRPGP15;SNRPG		1.8909	0.1403
Q765P7	Protein MTSS 2 OS=Homo sapiens OX=9606 GN=MTSS2 PE=1 SV=1	MTSS1L	1	0.943	0.603	Protein MTSS 2	MTSS2		1.8848	0.0328
Q92769	Histone deacetylase 2 OS=Homo sapiens OX=9606 GN=HDAC2 PE=1 SV=2	HDAC2	4	1.294	0.03309	Histone deacetylase 2	HDAC2		1.8836	0.1919
P08579	U2 small nuclear ribonucleoprotein B'' OS=Homo sapiens OX=9606 GN=SNRPB2 PE=1 SV=1	SNRPB2	2	1.18	0.1107	U2 small nuclear ribonucleoprotein B''	SNRPB2	2	1.8823	0.0679	U2 small nuclear ribonucleoprotein B	SNRPB2	3	1.1635	0.192417
Q00765	Receptor expression-enhancing protein 5 OS=Homo sapiens OX=9606 GN=REEP5 PE=1 SV=3	REEP5	3	0.943	0.6743	Receptor expression-enhancing protein 5	REEP5	2;1;1;1;1;1	1.8797	0.0048	Receptor expression-enhancing protein 5;Receptor expression-enhancing protein	REEP5	2	1.57033	0.0633222
Q8IXH7	Negative elongation factor C/D OS=Homo sapiens OX=9606 GN=NELFCD PE=1 SV=2	NELFCD; TH1L	1	0.825	0.3001	Negative elongation factor C/D	NELFCD		1.8782	0.034
O43447	Peptidyl-prolyl cis-trans isomerase H OS=Homo sapiens OX=9606 GN=PPIH PE=1 SV=1	PPIH	4	0.821	0.3181	Peptidyl-prolyl cis-trans isomerase H	PPIH		1.8775	0.2433
Q15392	Delta(24)-sterol reductase OS=Homo sapiens OX=9606 GN=DHCR24 PE=1 SV=2	DHCR24	2	1.649	0.01414	Delta(24)-sterol reductase	DHCR24		1.8738	0.0075
P08651	Nuclear factor 1 C-type OS=Homo sapiens OX=9606 GN=NFIC PE=1 SV=2	NFIC	5	1.297	0.06252	Nuclear factor 1 C-type	NFIC		1.8726	0.0719
Q9HCG8	Pre-mRNA-splicing factor CWC22 homolog OS=Homo sapiens OX=9606 GN=CWC22 PE=1 SV=3	CWC22	3	2.202	0.04626	Pre-mRNA-splicing factor CWC22 homolog	CWC22		1.8696	0.0001
Q9NY61	Protein AATF OS=Homo sapiens OX=9606 GN=AATF PE=1 SV=1	AATF	4	500	1e+20	Protein AATF	AATF	1;0	1.8652	0.0973	Protein AATF	AATF	2
Q9UKM9	RNA-binding protein Raly OS=Homo sapiens OX=9606 GN=RALY PE=1 SV=1	RALY	9	1.413	0.001351	RNA-binding protein Raly	RALY		1.8652	0.0014
Q13595	Transformer-2 protein homolog alpha OS=Homo sapiens OX=9606 GN=TRA2A PE=1 SV=1	TRA2A	3	1.294	0.1843	Transformer-2 protein homolog alpha	TRA2A	2;2;2;2	1.8619	0.0717	Transformer-2 protein homolog alpha	TRA2A	3	1.44429	0.12588
Q6SZW1	NAD(+) hydrolase SARM1 OS=Homo sapiens OX=9606 GN=SARM1 PE=1 SV=1	SARM1	4	1.247	0.212	NAD(+) hydrolase SARM1	SARM1	6;4;1;1;1	1.8573	0.0026	Sterile alpha and TIR motif-containing protein 1	SARM1	7	1.11014	0.391308
Q53H82	Endoribonuclease LACTB2 OS=Homo sapiens OX=9606 GN=LACTB2 PE=1 SV=2	LACTB2	4	0.785	0.5995	Endoribonuclease LACTB2	LACTB2		1.8551	0.2016
Q15742	NGFI-A-binding protein 2 OS=Homo sapiens OX=9606 GN=NAB2 PE=1 SV=1	NAB2	5	1.488	0.1779	NGFI-A-binding protein 2	NAB2	4;4;3;1;1;1;1;1;1;1	1.8549	0.0021	NGFI-A-binding protein 2	NAB2	4	1.6775	0.0118675
Q96DN6						Methyl-CpG-binding domain protein 6	MBD6		1.8549	0.0019
Q86X02	Cerebellar degeneration-related protein 2-like OS=Homo sapiens OX=9606 GN=CDR2L PE=1 SV=2	CDR2L	3	1.78	0.2304	Cerebellar degeneration-related protein 2-like	CDR2L		1.848	0.0189
P25490						Transcriptional repressor protein YY1	YY1		1.8465	0.1788
Q96FS4	Signal-induced proliferation-associated protein 1 OS=Homo sapiens OX=9606 GN=SIPA1 PE=1 SV=1	SIPA1	2	0.691	0.5898	Signal-induced proliferation-associated protein 1	SIPA1		1.8453	0.4171
O75487						Glypican-4	GPC4		1.8448	0.0411
Q8N954						G patch domain-containing protein 11	GPATCH11		1.8439	0.1877
O75151						Lysine-specific demethylase PHF2	PHF2		1.8437	0.0128
Q9UMX1	Suppressor of fused homolog OS=Homo sapiens OX=9606 GN=SUFU PE=1 SV=2	SUFU	2	0.88	0.3793	Suppressor of fused homolog	SUFU		1.842	0.0549
O75569	Interferon-inducible double-stranded RNA-dependent protein kinase activator A OS=Homo sapiens OX=9606 GN=PRKRA PE=1 SV=1	PRKRA	7	2.093	0.006462	Interferon-inducible double-stranded RNA-dependent protein kinase activator A	PRKRA		1.8355	0.0036
Q9UIS9	Methyl-CpG-binding domain protein 1 OS=Homo sapiens OX=9606 GN=MBD1 PE=1 SV=2	MBD1	2	1.234	0.062	Methyl-CpG-binding domain protein 1	MBD1		1.8301	0.0618
Q4L180	Filamin A-interacting protein 1-like OS=Homo sapiens OX=9606 GN=FILIP1L PE=1 SV=2	FILIP1L	7	2.081	0.0005551	Filamin A-interacting protein 1-like	FILIP1L		1.8284	0
Q9BTE3	Mini-chromosome maintenance complex-binding protein OS=Homo sapiens OX=9606 GN=MCMBP PE=1 SV=2	MCMBP	4	0.694	0.2	Mini-chromosome maintenance complex-binding protein	MCMBP		1.823	0.3664
O14925	Mitochondrial import inner membrane translocase subunit Tim23 OS=Homo sapiens OX=9606 GN=TIMM23 PE=1 SV=1	TIMM23	1	1.215	0.5984	Mitochondrial import inner membrane translocase subunit Tim23;Mitochondrial import inner membrane translocase subunit Tim23B	TIMM23;TIMM23B		1.8201	0.067
Q3B726						DNA-directed RNA polymerase I subunit RPA43	POLR1F		1.8183	0.1703
O14497	AT-rich interactive domain-containing protein 1A OS=Homo sapiens OX=9606 GN=ARID1A PE=1 SV=3	ARID1A	4	1.02	0.9511	AT-rich interactive domain-containing protein 1A	ARID1A		1.8142	0.1369
Q8N5C6						S1 RNA-binding domain-containing protein 1	SRBD1	4;2	1.8121	0.0449	S1 RNA-binding domain-containing protein 1	SRBD1	4	0.928733	0.737082
Q9Y576						Ankyrin repeat and SOCS box protein 1	ASB1		1.812	0.0104
Q9BQ61	Telomerase RNA component interacting RNase OS=Homo sapiens OX=9606 GN=TRIR PE=1 SV=1	C19orf43; TRIR	2	1.099	0.5173	Telomerase RNA component interacting RNase	TRIR		1.8107	0.0827
Q7Z422	SUZ domain-containing protein 1 OS=Homo sapiens OX=9606 GN=SZRD1 PE=1 SV=1	SZRD1	1	0.788		SUZ domain-containing protein 1	SZRD1		1.8099	0.0119
Q9HCP0	Casein kinase I isoform gamma-1 OS=Homo sapiens OX=9606 GN=CSNK1G1 PE=1 SV=1	CSNK1G1	3	0.993	0.9435	Casein kinase I isoform gamma-1	CSNK1G1		1.8017	0.2098
Q9NPD3						Exosome complex component RRP41	EXOSC4		1.799	0.0016
Q8NG11						Tetraspanin-14	TSPAN14		1.798	0.0081
Q06203	Amidophosphoribosyltransferase OS=Homo sapiens OX=9606 GN=PPAT PE=1 SV=1	PPAT	2	1.716		Amidophosphoribosyltransferase	PPAT	5;2;2	1.7973	0.0254	Amidophosphoribosyltransferase	PPAT	5	1.18841	0.63881
Q8N684	Cleavage and polyadenylation specificity factor subunit 7 OS=Homo sapiens OX=9606 GN=CPSF7 PE=1 SV=1	CPSF7	5	1.029	0.7997	Cleavage and polyadenylation specificity factor subunit 7	CPSF7		1.7971	0.0638
Q96KQ7						Histone-lysine N-methyltransferase EHMT2	EHMT2		1.797	0.1173
Q86US8						Telomerase-binding protein EST1A	SMG6		1.7969	0.0358
Q9BQ95	Evolutionarily conserved signaling intermediate in Toll pathway, mitochondrial OS=Homo sapiens OX=9606 GN=ECSIT PE=1 SV=1	ECSIT	2	0.831	0.5171	Evolutionarily conserved signaling intermediate in Toll pathway, mitochondrial	ECSIT		1.7936	0.0075
Q9NX24	H/ACA ribonucleoprotein complex subunit 2 OS=Homo sapiens OX=9606 GN=NHP2 PE=1 SV=1	NHP2	3	1.049	0.6757	H/ACA ribonucleoprotein complex subunit 2	NHP2		1.7935	0.0908
Q12789						General transcription factor 3C polypeptide 1	GTF3C1	2;2;1	1.7927	0.0479	General transcription factor 3C polypeptide 1	GTF3C1	3	1.16737	0.151593
O94832	Unconventional myosin-Id OS=Homo sapiens OX=9606 GN=MYO1D PE=1 SV=2	MYO1D	37	1.84	5.148e-05	Unconventional myosin-Id	MYO1D		1.7923	0.0008
Q11201						CMP-N-acetylneuraminate-beta-galactosamide-alpha-2,3-sialyltransferase 1	ST3GAL1		1.7908	0.0987
Q9BX46						RNA-binding protein 24;RNA-binding protein 38	RBM24;RBM38		1.7904	0.1015
P35659	Protein DEK OS=Homo sapiens OX=9606 GN=DEK PE=1 SV=1	DEK	6	1.53	0.02412	Protein DEK	DEK		1.7868	0.0001
P28340						DNA polymerase delta catalytic subunit	POLD1		1.785	0.0009
O60507	Protein-tyrosine sulfotransferase 1 OS=Homo sapiens OX=9606 GN=TPST1 PE=1 SV=1	TPST1	2	0.907	0.4774	Protein-tyrosine sulfotransferase 1	TPST1		1.7836	0.0984
O43395	U4/U6 small nuclear ribonucleoprotein Prp3 OS=Homo sapiens OX=9606 GN=PRPF3 PE=1 SV=2	PRPF3	7	1.254	0.3222	U4/U6 small nuclear ribonucleoprotein Prp3	PRPF3		1.7819	0.0047
Q8IWR1						Tripartite motif-containing protein 59	TRIM59		1.7818	0.2732
P17275						Transcription factor jun-B	JUNB		1.7798	0.2053
Q9NZT2						Opioid growth factor receptor	OGFR		1.7784	0.0483
O94854	Uncharacterized protein KIAA0754 OS=Homo sapiens OX=9606 GN=KIAA0754 PE=2 SV=4	KIAA0754	3	0.709		Uncharacterized protein KIAA0754	KIAA0754		1.7773	0.2514
P08754	Guanine nucleotide-binding protein G(i) subunit alpha-3 OS=Homo sapiens OX=9606 GN=GNAI3 PE=1 SV=3	GNAI3	13	1.277	0.1571	Guanine nucleotide-binding protein G(i) subunit alpha-3	GNAI3		1.7771	0.0113
Q9Y508	E3 ubiquitin-protein ligase RNF114 OS=Homo sapiens OX=9606 GN=RNF114 PE=1 SV=1	RNF114	3	1.659	0.145	E3 ubiquitin-protein ligase RNF114	RNF114		1.7759	0.0245
Q9NRX1	RNA-binding protein PNO1 OS=Homo sapiens OX=9606 GN=PNO1 PE=1 SV=1	PNO1	3	1.355	0.2407	RNA-binding protein PNO1	PNO1	3;1	1.769	0.213	RNA-binding protein PNO1	PNO1	3	1.16606	0.228816
Q9BVL2	Nucleoporin p58/p45 OS=Homo sapiens OX=9606 GN=NUP58 PE=1 SV=1	NUPL1; NUP58	3	0.932	0.8331	Nucleoporin p58/p45	NUP58		1.7688	0.0538
Q96JG8						Melanoma-associated antigen D4	MAGED4		1.7672	0.2535
P17535						Transcription factor jun-D	JUND		1.7642	0.0046
Q9BRQ8	Ferroptosis suppressor protein 1 OS=Homo sapiens OX=9606 GN=AIFM2 PE=1 SV=1	AIFM2	2	1.104	0.6394	Ferroptosis suppressor protein 1	AIFM2		1.7629	0.1037
Q5TEC6	Histone HIST2H3PS2 OS=Homo sapiens OX=9606 GN=H3-2 PE=1 SV=1	HIST2H3PS2	6	1.374	0.4813	Histone HIST2H3PS2	H3-2	1	1.7616	0.0003	Histone H3	HIST2H3PS2	1	1.83245	0.0494287
Q6IC98	GRAM domain-containing protein 4 OS=Homo sapiens OX=9606 GN=GRAMD4 PE=1 SV=1	GRAMD4	2	0.721	0.1632	GRAM domain-containing protein 4	GRAMD4		1.759	0.3248
Q0IIM8						TBC1 domain family member 8B	TBC1D8B		1.759	0.0646
P15151	Poliovirus receptor OS=Homo sapiens OX=9606 GN=PVR PE=1 SV=2	PVR	4	0.657	0.4621	Poliovirus receptor	PVR		1.7588	0.0862
O60333	Kinesin-like protein KIF1B OS=Homo sapiens OX=9606 GN=KIF1B PE=1 SV=5	KIF1B	4	0.83	0.3008	Kinesin-like protein KIF1B;Kinesin-like protein KIF1A	KIF1B;KIF1A		1.7582	0.0656
Q96GA3	Protein LTV1 homolog OS=Homo sapiens OX=9606 GN=LTV1 PE=1 SV=1	LTV1	1	500	1e+20	Protein LTV1 homolog	LTV1		1.7564	0.0251
Q86U86	Protein polybromo-1 OS=Homo sapiens OX=9606 GN=PBRM1 PE=1 SV=1	PBRM1	2	0.931	0.595	Protein polybromo-1	PBRM1		1.7536	0.1751
Q8N3U4	Cohesin subunit SA-2 OS=Homo sapiens OX=9606 GN=STAG2 PE=1 SV=3	STAG2	4	1.776	0.07053	Cohesin subunit SA-2	STAG2	8;8	1.7524	0.0182	Cohesin subunit SA-2	STAG2	8	1.10068	0.57678
P51608	Methyl-CpG-binding protein 2 OS=Homo sapiens OX=9606 GN=MECP2 PE=1 SV=1	MECP2	2	0.866	0.8188	Methyl-CpG-binding protein 2	MECP2		1.7524	0.111
Q9NTK5	Obg-like ATPase 1 OS=Homo sapiens OX=9606 GN=OLA1 PE=1 SV=2	OLA1	13	1.808	4.662e-05	Obg-like ATPase 1	OLA1		1.7494	0.0005
Q712K3	Ubiquitin-conjugating enzyme E2 R2 OS=Homo sapiens OX=9606 GN=UBE2R2 PE=1 SV=1	UBE2R2	3	0.88	0.5976	Ubiquitin-conjugating enzyme E2 R2	UBE2R2	2	1.7474	0.0152	Ubiquitin-conjugating enzyme E2 R2	UBE2R2	2	0.696322	0.1172
Q96EM0	Trans-3-hydroxy-L-proline dehydratase OS=Homo sapiens OX=9606 GN=L3HYPDH PE=1 SV=2	L3HYPDH	5	1.343	0.09063	Trans-3-hydroxy-L-proline dehydratase	L3HYPDH	6;3;3	1.7473	0.0058	Trans-3-hydroxy-L-proline dehydratase	L3HYPDH	6	1.44635	0.0233059
Q14562	ATP-dependent RNA helicase DHX8 OS=Homo sapiens OX=9606 GN=DHX8 PE=1 SV=1	DHX8	2	1.612	0.1714	ATP-dependent RNA helicase DHX8	DHX8		1.7435	0.0192
Q12929	Epidermal growth factor receptor kinase substrate 8 OS=Homo sapiens OX=9606 GN=EPS8 PE=1 SV=1	EPS8	15	1.838	0.000144	Epidermal growth factor receptor kinase substrate 8	EPS8		1.743	0
Q9H8Y5	Ankyrin repeat and zinc finger domain-containing protein 1 OS=Homo sapiens OX=9606 GN=ANKZF1 PE=1 SV=1	ANKZF1	3	1.804		Ankyrin repeat and zinc finger domain-containing protein 1	ANKZF1		1.7424	0.0247
Q9UIG0	Tyrosine-protein kinase BAZ1B OS=Homo sapiens OX=9606 GN=BAZ1B PE=1 SV=2	BAZ1B	10	0.951	0.5073	Tyrosine-protein kinase BAZ1B	BAZ1B	7;7	1.739	0.0014	Tyrosine-protein kinase BAZ1B	BAZ1B	7	1.55269	0.0310425
Q9UN37	Vacuolar protein sorting-associated protein 4A OS=Homo sapiens OX=9606 GN=VPS4A PE=1 SV=1	VPS4A	5	1.082	0.7199	Vacuolar protein sorting-associated protein 4A	VPS4A		1.7384	0.1582
Q9BZ67	FERM domain-containing protein 8 OS=Homo sapiens OX=9606 GN=FRMD8 PE=1 SV=1	FRMD8	2	0.861	0.3918	FERM domain-containing protein 8	FRMD8		1.7377	0.1529
P83881	60S ribosomal protein L36a OS=Homo sapiens OX=9606 GN=RPL36A PE=1 SV=2	RPL36A	3	0.737	0.7078	60S ribosomal protein L36a;60S ribosomal protein L36a-like	RPL36A;RPL36AL		1.7362	0.2256
Q92743						Serine protease HTRA1	HTRA1		1.7358	0.2895
Q06481						Amyloid-like protein 2	APLP2		1.7346	0.2749
Q8WUF5	RelA-associated inhibitor OS=Homo sapiens OX=9606 GN=PPP1R13L PE=1 SV=4	PPP1R13L	12	1.988	0.001859	RelA-associated inhibitor	PPP1R13L	8;2	1.7323	0.0004	RelA-associated inhibitor	PPP1R13L	9	1.65148	0.0121516
Q05193	Dynamin-1 OS=Homo sapiens OX=9606 GN=DNM1 PE=1 SV=2	DNM1	11	0.988	0.8458	Dynamin-1	DNM1		1.73	0.0009
O94885	SAM and SH3 domain-containing protein 1 OS=Homo sapiens OX=9606 GN=SASH1 PE=1 SV=3	SASH1	4	2.047	0.1746	SAM and SH3 domain-containing protein 1	SASH1		1.7293	0.0278
Q7Z4H8	Protein O-glucosyltransferase 3 OS=Homo sapiens OX=9606 GN=POGLUT3 PE=1 SV=2	KDELC2	7	2.024	0.1005	Protein O-glucosyltransferase 3	POGLUT3		1.7274	0.0043
Q8NAV1	Pre-mRNA-splicing factor 38A OS=Homo sapiens OX=9606 GN=PRPF38A PE=1 SV=1	PRPF38A	4	1.091	0.5321	Pre-mRNA-splicing factor 38A	PRPF38A	4	1.7224	0.0506	Pre-mRNA-splicing factor 38A	PRPF38A	4	0.998685	0.986689
O00560	Syntenin-1 OS=Homo sapiens OX=9606 GN=SDCBP PE=1 SV=1	SDCBP	4	1.293	0.2416	Syntenin-1	SDCBP	2;2	1.7218	0.0035	Syntenin-1	SDCBP	3	1.11308	0.693534
Q96IG2	F-box/LRR-repeat protein 20 OS=Homo sapiens OX=9606 GN=FBXL20 PE=1 SV=2	FBXL20	5	0.934	0.59	F-box/LRR-repeat protein 20	FBXL20		1.7196	0.0736
O95478	Ribosome biogenesis protein NSA2 homolog OS=Homo sapiens OX=9606 GN=NSA2 PE=1 SV=1	NSA2	4	1.233	0.0156	Ribosome biogenesis protein NSA2 homolog	NSA2		1.717	0.122
P35754	Glutaredoxin-1 OS=Homo sapiens OX=9606 GN=GLRX PE=1 SV=2	GLRX	2	1.268	0.1371	Glutaredoxin-1	GLRX		1.7167	0.0408
P17096	High mobility group protein HMG-I/HMG-Y OS=Homo sapiens OX=9606 GN=HMGA1 PE=1 SV=3	HMGA1	4	1.636	0.00714	High mobility group protein HMG-I/HMG-Y	HMGA1		1.7153	0.2581
Q7Z4V5	Hepatoma-derived growth factor-related protein 2 OS=Homo sapiens OX=9606 GN=HDGFL2 PE=1 SV=1	HDGFRP2; HDGFL2	5	1.28	0.1348	Hepatoma-derived growth factor-related protein 2	HDGFL2	2;2;1;1;1;1;1;0;0	1.7141	0.0016	Hepatoma-derived growth factor-related protein 2	HDGFRP2	3	1.078	0.433479
Q9Y383	Putative RNA-binding protein Luc7-like 2 OS=Homo sapiens OX=9606 GN=LUC7L2 PE=1 SV=2	LUC7L2	4	1.225	0.1748	Putative RNA-binding protein Luc7-like 2	LUC7L2		1.7138	0.0568
P49643						DNA primase large subunit	PRIM2		1.7131	0.0002
P62487	DNA-directed RNA polymerase II subunit RPB7 OS=Homo sapiens OX=9606 GN=POLR2G PE=1 SV=1	POLR2G	4	1.276	0.6119	DNA-directed RNA polymerase II subunit RPB7	POLR2G		1.7068	0.029
O75886	Signal transducing adapter molecule 2 OS=Homo sapiens OX=9606 GN=STAM2 PE=1 SV=1	STAM2	9	1.165	0.2976	Signal transducing adapter molecule 2	STAM2	7;7	1.704	0.011	Signal transducing adapter molecule 2	STAM2	7	1.24973	0.327806
P52758	2-iminobutanoate/2-iminopropanoate deaminase OS=Homo sapiens OX=9606 GN=RIDA PE=1 SV=1	HRSP12; RIDA	3	1.239	0.05309	2-iminobutanoate/2-iminopropanoate deaminase	RIDA		1.7027	0.0057
Q9UMY4	Sorting nexin-12 OS=Homo sapiens OX=9606 GN=SNX12 PE=1 SV=4	SNX12	5	0.807	0.2756	Sorting nexin-12	SNX12		1.7012	0.0933
P62306	Small nuclear ribonucleoprotein F OS=Homo sapiens OX=9606 GN=SNRPF PE=1 SV=1	SNRPF	2	1.054	0.7181	Small nuclear ribonucleoprotein F	SNRPF		1.701	0.0797
Q9BX68	Histidine triad nucleotide-binding protein 2, mitochondrial OS=Homo sapiens OX=9606 GN=HINT2 PE=1 SV=1	HINT2	3	0.612	0.1612	Histidine triad nucleotide-binding protein 2, mitochondrial	HINT2		1.6989	0.0606
P51805						Plexin-A3	PLXNA3		1.6972	0.0437
P35251						Replication factor C subunit 1	RFC1	3;3;1;1	1.6968	0.0053	Replication factor C subunit 1	RFC1	3	1.26445	0.51117
Q5VV42						Threonylcarbamoyladenosine tRNA methylthiotransferase	CDKAL1		1.6967	0.075
Q9H3K6	BolA-like protein 2 OS=Homo sapiens OX=9606 GN=BOLA2 PE=1 SV=1	BOLA2B; BOLA2; LOC107984053	3	0.999	0.9883	BolA-like protein 2	BOLA2	3;2;2;2;1;1;1;1	1.6966	0.0303	BolA-like protein 2	BOLA2;BOLA2B	3	1.08289	0.743622
Q02790	Peptidyl-prolyl cis-trans isomerase FKBP4 OS=Homo sapiens OX=9606 GN=FKBP4 PE=1 SV=3	FKBP4	11	1.309	0.008623	Peptidyl-prolyl cis-trans isomerase FKBP4	FKBP4	7;1;1	1.6955	0.0218	Peptidyl-prolyl cis-trans isomerase FKBP4;Peptidyl-prolyl cis-trans isomerase FKBP4, N-terminally processed	FKBP4	7	1.49285	0.0672207
Q7Z3K3	Pogo transposable element with ZNF domain OS=Homo sapiens OX=9606 GN=POGZ PE=1 SV=2	POGZ	2	1.102	0.4159	Pogo transposable element with ZNF domain	POGZ		1.6925	0.1326
Q9NP81						Serine--tRNA ligase, mitochondrial	SARS2		1.6909	0.3985
O15347	High mobility group protein B3 OS=Homo sapiens OX=9606 GN=HMGB3 PE=1 SV=4	HMGB3	3	1.524	0.01661	High mobility group protein B3	HMGB3		1.69	0.0123
P16455						Methylated-DNA--protein-cysteine methyltransferase	MGMT		1.69	0.0926
Q13153	Serine/threonine-protein kinase PAK 1 OS=Homo sapiens OX=9606 GN=PAK1 PE=1 SV=2	PAK1	4	1.334		Serine/threonine-protein kinase PAK 1	PAK1		1.6893	0.1176
Q9BW83	Intraflagellar transport protein 27 homolog OS=Homo sapiens OX=9606 GN=IFT27 PE=1 SV=1	IFT27	3	0.748	0.0234	Intraflagellar transport protein 27 homolog	IFT27	3;3;2;1;1	1.6892	0.0635	Intraflagellar transport protein 27 homolog	IFT27	3	1.00936	0.928588
P24941	Cyclin-dependent kinase 2 OS=Homo sapiens OX=9606 GN=CDK2 PE=1 SV=2	CDK2	3	1.293	0.03425	Cyclin-dependent kinase 2	CDK2		1.6888	0.0072
Q8IXB1	DnaJ homolog subfamily C member 10 OS=Homo sapiens OX=9606 GN=DNAJC10 PE=1 SV=2	DNAJC10	10	1.315	0.009841	DnaJ homolog subfamily C member 10	DNAJC10	4;3	1.6872	0.0184	DnaJ homolog subfamily C member 10	DNAJC10	4	1.48744	0.0251607
Q08426	Peroxisomal bifunctional enzyme OS=Homo sapiens OX=9606 GN=EHHADH PE=1 SV=3	EHHADH	4	1.122	0.2438	Peroxisomal bifunctional enzyme	EHHADH		1.6862	0.0004
Q17RY0	Cytoplasmic polyadenylation element-binding protein 4 OS=Homo sapiens OX=9606 GN=CPEB4 PE=1 SV=1	CPEB4	1	0.737	0.2402	Cytoplasmic polyadenylation element-binding protein 4;Cytoplasmic polyadenylation element-binding protein 2;Cytoplasmic polyadenylation element-binding protein 3	CPEB4;CPEB2;CPEB3		1.686	0.2661
Q9HD15	Steroid receptor RNA activator 1 OS=Homo sapiens OX=9606 GN=SRA1 PE=1 SV=1	SRA1	1	1.146	0.5578	Steroid receptor RNA activator 1	SRA1		1.6844	0.1966
Q9P2E5	Chondroitin sulfate glucuronyltransferase OS=Homo sapiens OX=9606 GN=CHPF2 PE=2 SV=2	CHPF2	4	0.638	0.1663	Chondroitin sulfate glucuronyltransferase	CHPF2		1.6836	0.049
Q53LP3						Ankyrin repeat domain-containing protein SOWAHC	SOWAHC	3	1.6811	0.0338	Ankyrin repeat domain-containing protein SOWAHC	SOWAHC	3
Q9NZU5	LIM and cysteine-rich domains protein 1 OS=Homo sapiens OX=9606 GN=LMCD1 PE=1 SV=1	LMCD1	11	1.907	5.752e-06	LIM and cysteine-rich domains protein 1	LMCD1	9;9;8;5;4	1.6796	0.0007	LIM and cysteine-rich domains protein 1	LMCD1	9	1.99043	0.000304718
Q10588	ADP-ribosyl cyclase/cyclic ADP-ribose hydrolase 2 OS=Homo sapiens OX=9606 GN=BST1 PE=1 SV=2	BST1	2	0.833	0.1898	ADP-ribosyl cyclase/cyclic ADP-ribose hydrolase 2	BST1	4;3;3;2;1;1	1.6786	0.0025	ADP-ribosyl cyclase/cyclic ADP-ribose hydrolase 2	BST1	4	0.713506	0.590666
Q9NZ56	Formin-2 OS=Homo sapiens OX=9606 GN=FMN2 PE=1 SV=4	FMN2	4	0.688	0.259	Formin-2	FMN2		1.6784	0.017
O75223	Gamma-glutamylcyclotransferase OS=Homo sapiens OX=9606 GN=GGCT PE=1 SV=1	GGCT	4	0.781	0.2777	Gamma-glutamylcyclotransferase	GGCT		1.6776	0.1853
Q16527	Cysteine and glycine-rich protein 2 OS=Homo sapiens OX=9606 GN=CSRP2 PE=1 SV=3	CSRP2	5	2.701	5.245e-05	Cysteine and glycine-rich protein 2	CSRP2		1.6775	0.0244
P55287	Cadherin-11 OS=Homo sapiens OX=9606 GN=CDH11 PE=2 SV=2	CDH11	5	1.433	0.1219	Cadherin-11	CDH11		1.6765	0.0909
Q9P273						Teneurin-3	TENM3	4	1.6738	0.0001	Teneurin-3	TENM3	5	1.35527	0.0402515
P56182	Ribosomal RNA processing protein 1 homolog A OS=Homo sapiens OX=9606 GN=RRP1 PE=1 SV=1	RRP1	3	0.857	0.5223	Ribosomal RNA processing protein 1 homolog A	RRP1	3	1.6692	0.021	Ribosomal RNA processing protein 1 homolog A	RRP1	3	1.29823	0.114666
Q8N264						Rho GTPase-activating protein 24	ARHGAP24		1.6692	0.1111
Q9Y4K4	Mitogen-activated protein kinase kinase kinase kinase 5 OS=Homo sapiens OX=9606 GN=MAP4K5 PE=1 SV=2		7	1.828	0.02409	Mitogen-activated protein kinase kinase kinase kinase 5	MAP4K5	5	1.6688	0.0047	Mitogen-activated protein kinase kinase kinase kinase 5	MAP4K5	5	1.22139	0.0465976
Q7Z3V4						Ubiquitin-protein ligase E3B	UBE3B		1.6655	0.3188
O60704	Protein-tyrosine sulfotransferase 2 OS=Homo sapiens OX=9606 GN=TPST2 PE=1 SV=1	TPST2	1	0.849	0.3096	Protein-tyrosine sulfotransferase 2	TPST2		1.665	0.1723
Q9BRK5	45 kDa calcium-binding protein OS=Homo sapiens OX=9606 GN=SDF4 PE=1 SV=1	SDF4	6	1.049	0.7227	45 kDa calcium-binding protein	SDF4	5;5;4;4;2;2	1.6644	0.0002	45 kDa calcium-binding protein	SDF4	5	1.313	0.232141
P52294	Importin subunit alpha-5 OS=Homo sapiens OX=9606 GN=KPNA1 PE=1 SV=3	KPNA1	9	1.042	0.5461	Importin subunit alpha-5	KPNA1	8;4;1;1;1;1	1.6641	0.0456	Importin subunit alpha-5;Importin subunit alpha-5, N-terminally processed	KPNA1	8	0.91143	0.382362
Q9BZL4						Protein phosphatase 1 regulatory subunit 12C	PPP1R12C		1.664	0.059
O95671	Probable bifunctional dTTP/UTP pyrophosphatase/methyltransferase protein OS=Homo sapiens OX=9606 GN=ASMTL PE=1 SV=3	ASMTL	5	1.486	0.4137	Probable bifunctional dTTP/UTP pyrophosphatase/methyltransferase protein	ASMTL	5;5;5	1.6632	0.0006	N-acetylserotonin O-methyltransferase-like protein	ASMTL	6	1.51194	0.0679509
P11274	Breakpoint cluster region protein OS=Homo sapiens OX=9606 GN=BCR PE=1 SV=2	BCR	2	0.915	0.4619	Breakpoint cluster region protein	BCR		1.6614	0.0859
P35268	60S ribosomal protein L22 OS=Homo sapiens OX=9606 GN=RPL22 PE=1 SV=2	RPL22	5	1.008	0.8534	60S ribosomal protein L22	RPL22		1.6532	0.0266
Q9ULX6	A-kinase anchor protein 8-like OS=Homo sapiens OX=9606 GN=AKAP8L PE=1 SV=4	AKAP8L	2	0.711	0.2938	A-kinase anchor protein 8-like	AKAP8L		1.6522	0.0707
P11117	Lysosomal acid phosphatase OS=Homo sapiens OX=9606 GN=ACP2 PE=1 SV=3	ACP2	6	0.793	0.184	Lysosomal acid phosphatase	ACP2		1.6516	0.0669
Q05397	Focal adhesion kinase 1 OS=Homo sapiens OX=9606 GN=PTK2 PE=1 SV=2	PTK2	4	0.927	0.8686	Focal adhesion kinase 1	PTK2		1.6512	0.0014
O75934	Pre-mRNA-splicing factor SPF27 OS=Homo sapiens OX=9606 GN=BCAS2 PE=1 SV=1	BCAS2	5	1.394	0.2307	Pre-mRNA-splicing factor SPF27	BCAS2		1.6496	0.479
Q7Z7A4	PX domain-containing protein kinase-like protein OS=Homo sapiens OX=9606 GN=PXK PE=1 SV=1	PXK	3	0.904	0.3331	PX domain-containing protein kinase-like protein	PXK		1.6477	0.1192
P23786	Carnitine O-palmitoyltransferase 2, mitochondrial OS=Homo sapiens OX=9606 GN=CPT2 PE=1 SV=2	CPT2	3	1.379	0.507	Carnitine O-palmitoyltransferase 2, mitochondrial	CPT2		1.6443	0.0526
Q8N8J7						Uncharacterized protein FAM241A	FAM241A		1.6438	0.1729
P49790	Nuclear pore complex protein Nup153 OS=Homo sapiens OX=9606 GN=NUP153 PE=1 SV=2	NUP153	6	1.403	0.4722	Nuclear pore complex protein Nup153	NUP153	6;6;6	1.6428	0.0438	Nuclear pore complex protein Nup153	NUP153	6	1.23638	0.498283
Q9NTI5	Sister chromatid cohesion protein PDS5 homolog B OS=Homo sapiens OX=9606 GN=PDS5B PE=1 SV=1	PDS5B	8	1.463	0.2014	Sister chromatid cohesion protein PDS5 homolog B	PDS5B	8;8;3;2;1	1.6424	0.0459	Sister chromatid cohesion protein PDS5 homolog B	PDS5B	8	1.61546	0.0311712
Q3KQV9	UDP-N-acetylhexosamine pyrophosphorylase-like protein 1 OS=Homo sapiens OX=9606 GN=UAP1L1 PE=1 SV=2	UAP1L1	7	1.609	0.02962	UDP-N-acetylhexosamine pyrophosphorylase-like protein 1	UAP1L1	4;2;1	1.6421	0.006	UDP-N-acetylhexosamine pyrophosphorylase-like protein 1	UAP1L1	4	1.47035	0.0665134
Q9UBR2	Cathepsin Z OS=Homo sapiens OX=9606 GN=CTSZ PE=1 SV=1	CTSZ	4	1.552	0.0004837	Cathepsin Z	CTSZ		1.6408	0.0026
Q96EQ0	Small glutamine-rich tetratricopeptide repeat-containing protein beta OS=Homo sapiens OX=9606 GN=SGTB PE=1 SV=1	SGTB	3	1.146	0.6667	Small glutamine-rich tetratricopeptide repeat-containing protein beta	SGTB		1.6406	0.0636
P62699						Protein yippee-like 5	YPEL5		1.637	0.0302
Q96BY7						Autophagy-related protein 2 homolog B	ATG2B		1.6356	0.0439
Q9NQT5	Exosome complex component RRP40 OS=Homo sapiens OX=9606 GN=EXOSC3 PE=1 SV=3	EXOSC3	3	1.057	0.7815	Exosome complex component RRP40	EXOSC3		1.6318	0.0182
O60427						Acyl-CoA (8-3)-desaturase	FADS1		1.6316	0.0125
Q9BZM5	UL16-binding protein 2 OS=Homo sapiens OX=9606 GN=ULBP2 PE=1 SV=1	ULBP2	3	0.895	0.5928	UL16-binding protein 2	ULBP2		1.6315	0.1538
O14681	Etoposide-induced protein 2.4 homolog OS=Homo sapiens OX=9606 GN=EI24 PE=1 SV=4	EI24	2	1.19	0.4886	Etoposide-induced protein 2.4 homolog	EI24		1.6232	0.219
Q86XI2						Condensin-2 complex subunit G2	NCAPG2		1.6223	0.2625
Q86YS6	Ras-related protein Rab-43 OS=Homo sapiens OX=9606 GN=RAB43 PE=1 SV=1	RAB43	4	1.05	0.674	Ras-related protein Rab-43	RAB43		1.6218	0.0187
Q99685	Monoglyceride lipase OS=Homo sapiens OX=9606 GN=MGLL PE=1 SV=2	MGLL	6	1.15	0.2803	Monoglyceride lipase	MGLL		1.619	0.004
Q9NUT2						Mitochondrial potassium channel ATP-binding subunit	ABCB8		1.619	0.1388
Q8IX18						Probable ATP-dependent RNA helicase DHX40	DHX40	3;3;3;3;2;1	1.6157	0.0591	Probable ATP-dependent RNA helicase DHX40	DHX40	3	1.33684	0.0891023
O15085						Rho guanine nucleotide exchange factor 11	ARHGEF11		1.6142	0.0036
Q9UBU9	Nuclear RNA export factor 1 OS=Homo sapiens OX=9606 GN=NXF1 PE=1 SV=1	NXF1	10	1.238	0.2128	Nuclear RNA export factor 1	NXF1		1.6132	0.0186
O00423	Echinoderm microtubule-associated protein-like 1 OS=Homo sapiens OX=9606 GN=EML1 PE=1 SV=3	EML1	5	1.883	0.02986	Echinoderm microtubule-associated protein-like 1	EML1		1.6103	0.0261
Q9NRF8						CTP synthase 2	CTPS2	5	1.6085	0.1561	CTP synthase 2	CTPS2	5	0.971644	0.716185
Q5T1J5	Putative coiled-coil-helix-coiled-coil-helix domain-containing protein CHCHD2P9, mitochondrial OS=Homo sapiens OX=9606 GN=CHCHD2P9 PE=5 SV=1	CHCHD2P9	2	1.574	0.1074	Putative coiled-coil-helix-coiled-coil-helix domain-containing protein CHCHD2P9, mitochondrial;Coiled-coil-helix-coiled-coil-helix domain-containing protein 2	CHCHD2P9;CHCHD2		1.6076	0.1661
Q8N2G6						Zinc finger CCHC domain-containing protein 24	ZCCHC24		1.6064	0.4283
Q8NI36	WD repeat-containing protein 36 OS=Homo sapiens OX=9606 GN=WDR36 PE=1 SV=1	WDR36	5	1.321	0.1083	WD repeat-containing protein 36	WDR36		1.6063	0.001
P05413						Fatty acid-binding protein, heart	FABP3		1.6052	0.0215
Q8N129	Protein canopy homolog 4 OS=Homo sapiens OX=9606 GN=CNPY4 PE=1 SV=1	CNPY4	6	1.301	0.366	Protein canopy homolog 4	CNPY4	4;3	1.602	0.1853	Protein canopy homolog 4	CNPY4	4	1.0201	0.943449
Q8NFC6						Biorientation of chromosomes in cell division protein 1-like 1	BOD1L1		1.602	0.3122
Q14683	Structural maintenance of chromosomes protein 1A OS=Homo sapiens OX=9606 GN=SMC1A PE=1 SV=2	SMC1A	19	1.248	0.03048	Structural maintenance of chromosomes protein 1A	SMC1A	13;12;3;2;1	1.6007	0.0011	Structural maintenance of chromosomes protein 1A;Structural maintenance of chromosomes protein	SMC1A	13	1.37303	0.0143212
Q9BRZ2	E3 ubiquitin-protein ligase TRIM56 OS=Homo sapiens OX=9606 GN=TRIM56 PE=1 SV=3	TRIM56	5	0.672	0.2354	E3 ubiquitin-protein ligase TRIM56	TRIM56	6;3;3;2	1.5997	0.0066	E3 ubiquitin-protein ligase TRIM56	TRIM56	6	1.0263	0.663814
Q8TF72						Protein Shroom3	SHROOM3		1.5989	0.1154
Q9NZC9						SWI/SNF-related matrix-associated actin-dependent regulator of chromatin subfamily A-like protein 1	SMARCAL1		1.5979	0.2874
O43520						Phospholipid-transporting ATPase IC	ATP8B1	2;1	1.5977	0.0004	Phospholipid-transporting ATPase IC	ATP8B1	2	1.10238	0.43119
Q6DKI1	60S ribosomal protein L7-like 1 OS=Homo sapiens OX=9606 GN=RPL7L1 PE=1 SV=2		3	1.278	0.147	60S ribosomal protein L7-like 1	RPL7L1		1.5974	0.0152
O75381	Peroxisomal membrane protein PEX14 OS=Homo sapiens OX=9606 GN=PEX14 PE=1 SV=1	PEX14	1	1.04	0.8421	Peroxisomal membrane protein PEX14	PEX14		1.5974	0.1109
Q8NE01	Metal transporter CNNM3 OS=Homo sapiens OX=9606 GN=CNNM3 PE=1 SV=1	CNNM3	1	0.977	0.9333	Metal transporter CNNM3	CNNM3		1.5952	0.1419
P85037	Forkhead box protein K1 OS=Homo sapiens OX=9606 GN=FOXK1 PE=1 SV=1	FOXK1	3	1.052	0.381	Forkhead box protein K1	FOXK1		1.5927	0.2555
O95602	DNA-directed RNA polymerase I subunit RPA1 OS=Homo sapiens OX=9606 GN=POLR1A PE=1 SV=2	POLR1A	6	0.981	0.8907	DNA-directed RNA polymerase I subunit RPA1	POLR1A		1.5906	0.0304
O00625						Pirin	PIR		1.5905	0.1079
Q9Y3D8	Adenylate kinase isoenzyme 6 OS=Homo sapiens OX=9606 GN=AK6 PE=1 SV=1	AK6; TAF9	2	1.189	0.3819	Adenylate kinase isoenzyme 6	AK6		1.5899	0.1407
P35226						Polycomb complex protein BMI-1	BMI1		1.5893	0.1192
Q8WYL5	Protein phosphatase Slingshot homolog 1 OS=Homo sapiens OX=9606 GN=SSH1 PE=1 SV=2	SSH1	3	0.645	0.167	Protein phosphatase Slingshot homolog 1	SSH1		1.5884	0.0996
Q15003	Condensin complex subunit 2 OS=Homo sapiens OX=9606 GN=NCAPH PE=1 SV=3	NCAPH	2	1.271		Condensin complex subunit 2	NCAPH		1.5878	0.0002
Q86SQ0	Pleckstrin homology-like domain family B member 2 OS=Homo sapiens OX=9606 GN=PHLDB2 PE=1 SV=2	PHLDB2	4	1.112	0.6728	Pleckstrin homology-like domain family B member 2	PHLDB2		1.5855	0.0768
Q13123	Protein Red OS=Homo sapiens OX=9606 GN=IK PE=1 SV=3	IK	4	1.473	0.02313	Protein Red	IK	3;2;1;1	1.5832	0.0588	Protein Red	IK	3	1.26348	0.0531703
Q6AI08						HEAT repeat-containing protein 6	HEATR6		1.5826	0.0371
Q96BP3	Peptidylprolyl isomerase domain and WD repeat-containing protein 1 OS=Homo sapiens OX=9606 GN=PPWD1 PE=1 SV=1	PPWD1	3	0.809	0.09117	Peptidylprolyl isomerase domain and WD repeat-containing protein 1	PPWD1		1.5819	0.0538
Q96ST3						Paired amphipathic helix protein Sin3a	SIN3A	3	1.5805	0.106	Paired amphipathic helix protein Sin3a	SIN3A	3	0.491079	0.113528
Q96GP6						Scavenger receptor class F member 2	SCARF2		1.5796	0.0001
Q96J01	THO complex subunit 3 OS=Homo sapiens OX=9606 GN=THOC3 PE=1 SV=1	THOC3	3	1.2	0.5884	THO complex subunit 3	THOC3		1.5781	0.0156
Q5VWJ9	Sorting nexin-30 OS=Homo sapiens OX=9606 GN=SNX30 PE=1 SV=1	SNX30	3	0.949	0.8339	Sorting nexin-30	SNX30	4	1.5781	0.3949	Sorting nexin-30	SNX30	4	1.43061	0.159272
O75391						Sperm-associated antigen 7	SPAG7		1.5777	0.3278
P78536	Disintegrin and metalloproteinase domain-containing protein 17 OS=Homo sapiens OX=9606 GN=ADAM17 PE=1 SV=1	ADAM17	4	2.447	0.06118	Disintegrin and metalloproteinase domain-containing protein 17	ADAM17		1.5773	0.1159
P21127	Cyclin-dependent kinase 11B OS=Homo sapiens OX=9606 GN=CDK11B PE=1 SV=4		4	0.963	0.8679	Cyclin-dependent kinase 11B;Cyclin-dependent kinase 11A	CDK11B;CDK11A		1.5773	0.0166
P17480	Nucleolar transcription factor 1 OS=Homo sapiens OX=9606 GN=UBTF PE=1 SV=1	UBTF	9	1.679	0.01244	Nucleolar transcription factor 1	UBTF		1.5761	0.0002
O75937	DnaJ homolog subfamily C member 8 OS=Homo sapiens OX=9606 GN=DNAJC8 PE=1 SV=2	DNAJC8	5	1.028	0.7798	DnaJ homolog subfamily C member 8	DNAJC8		1.5752	0.0043
P26583	High mobility group protein B2 OS=Homo sapiens OX=9606 GN=HMGB2 PE=1 SV=2	HMGB2	5	1.806	0.05323	High mobility group protein B2	HMGB2		1.5749	0.4101
P78345						Ribonuclease P protein subunit p38	RPP38		1.5742	0.0372
P43378						Tyrosine-protein phosphatase non-receptor type 9	PTPN9		1.5741	0.0026
Q13601	KRR1 small subunit processome component homolog OS=Homo sapiens OX=9606 GN=KRR1 PE=1 SV=4	KRR1	5	1.264	0.5613	KRR1 small subunit processome component homolog	KRR1	4;3	1.5734	0.1475	KRR1 small subunit processome component homolog	KRR1	4	1.18041	0.234891
B0YJ81						Very-long-chain (3R)-3-hydroxyacyl-CoA dehydratase 1	HACD1		1.5725	0.1552
Q9NSI2						Protein FAM207A	FAM207A		1.5718	0.0181
Q14573						Inositol 1,4,5-trisphosphate receptor type 3	ITPR3		1.571	0.2508
Q9NVU7	Protein SDA1 homolog OS=Homo sapiens OX=9606 GN=SDAD1 PE=1 SV=3	SDAD1	2	1.318	0.7043	Protein SDA1 homolog	SDAD1		1.5702	0.1407
P61313	60S ribosomal protein L15 OS=Homo sapiens OX=9606 GN=RPL15 PE=1 SV=2	RPL15	8	1.191	0.224	60S ribosomal protein L15	RPL15		1.5692	0.3311
P39687	Acidic leucine-rich nuclear phosphoprotein 32 family member A OS=Homo sapiens OX=9606 GN=ANP32A PE=1 SV=1	ANP32A	8	1.273	0.02849	Acidic leucine-rich nuclear phosphoprotein 32 family member A	ANP32A		1.5677	0.0236
Q15050	Ribosome biogenesis regulatory protein homolog OS=Homo sapiens OX=9606 GN=RRS1 PE=1 SV=2	RRS1	7	1.081	0.7647	Ribosome biogenesis regulatory protein homolog	RRS1	4	1.5667	0.1077	Ribosome biogenesis regulatory protein homolog	RRS1	4	1.14039	0.530264
P50452						Serpin B8	SERPINB8		1.5659	0.0744
P62917	60S ribosomal protein L8 OS=Homo sapiens OX=9606 GN=RPL8 PE=1 SV=2	RPL8	8	1.047	0.6295	60S ribosomal protein L8	RPL8		1.5649	0.139
Q8TDJ6						DmX-like protein 2	DMXL2		1.5639	0.1898
P04150	Glucocorticoid receptor OS=Homo sapiens OX=9606 GN=NR3C1 PE=1 SV=1	NR3C1	8	1.188	0.09532	Glucocorticoid receptor	NR3C1	6;6;6;6;6;6;6;6;6;6;6;5;5;2;2;2;1;1	1.5625	0.0746	Glucocorticoid receptor	NR3C1	6	1.08388	0.764613
P51828						Adenylate cyclase type 7	ADCY7		1.5617	0.2008
Q5H8A4	GPI ethanolamine phosphate transferase 2 OS=Homo sapiens OX=9606 GN=PIGG PE=1 SV=1	PIGG	2	1.863	0.5837	GPI ethanolamine phosphate transferase 2	PIGG		1.5615	0.0709
Q69YN4	Protein virilizer homolog OS=Homo sapiens OX=9606 GN=VIRMA PE=1 SV=2	KIAA1429; VIRMA	3	1.029	0.7524	Protein virilizer homolog	VIRMA	2;2;1;1;1;1	1.5615	0.1316	Protein virilizer homolog	KIAA1429	2
Q96HS1	Serine/threonine-protein phosphatase PGAM5, mitochondrial OS=Homo sapiens OX=9606 GN=PGAM5 PE=1 SV=2	PGAM5	6	0.827	0.06397	Serine/threonine-protein phosphatase PGAM5, mitochondrial	PGAM5	3;2;2	1.5594	0.1403	Serine/threonine-protein phosphatase PGAM5, mitochondrial	PGAM5	4	0.973402	0.612727
O95210	Starch-binding domain-containing protein 1 OS=Homo sapiens OX=9606 GN=STBD1 PE=1 SV=1	STBD1	4	1.327	0.03873	Starch-binding domain-containing protein 1	STBD1		1.5589	0.2044
Q9H4G4	Golgi-associated plant pathogenesis-related protein 1 OS=Homo sapiens OX=9606 GN=GLIPR2 PE=1 SV=3	GLIPR2	4	1.617	0.0003716	Golgi-associated plant pathogenesis-related protein 1	GLIPR2	2;1;1	1.5574	0.0323	Golgi-associated plant pathogenesis-related protein 1	GLIPR2	2	500	1e-20
Q6ZUX7						LHFPL tetraspan subfamily member 2 protein	LHFPL2		1.5572	0.0694
P51153	Ras-related protein Rab-13 OS=Homo sapiens OX=9606 GN=RAB13 PE=1 SV=1	RAB13	4	1.573	0.006958	Ras-related protein Rab-13	RAB13		1.5569	0.0068
O94888	UBX domain-containing protein 7 OS=Homo sapiens OX=9606 GN=UBXN7 PE=1 SV=2	UBXN7	3	1.125	0.7643	UBX domain-containing protein 7	UBXN7	3;2;1	1.5557	0.033	UBX domain-containing protein 7	UBXN7	3	1.319	0.00521102
A6NFQ2	TRPM8 channel-associated factor 2 OS=Homo sapiens OX=9606 GN=TCAF2 PE=1 SV=2	FAM115C; TCAF2	1	1.213	0.5238	TRPM8 channel-associated factor 2	TCAF2		1.5555	0.0425
P06400	Retinoblastoma-associated protein OS=Homo sapiens OX=9606 GN=RB1 PE=1 SV=2	RB1	6	1.137	0.3209	Retinoblastoma-associated protein	RB1		1.5548	0.054
Q9H0T7	Ras-related protein Rab-17 OS=Homo sapiens OX=9606 GN=RAB17 PE=1 SV=2	RAB17	1	1.178	0.427	Ras-related protein Rab-17	RAB17		1.5522	0.2639
Q9H1Z4	WD repeat-containing protein 13 OS=Homo sapiens OX=9606 GN=WDR13 PE=1 SV=2	WDR13	3	0.771	0.6028	WD repeat-containing protein 13	WDR13	3;2;1;1	1.5521	0.0733	WD repeat-containing protein 13	WDR13	3	1.08239	0.483679
O15047						Histone-lysine N-methyltransferase SETD1A	SETD1A		1.5514	0.3237
O43913						Origin recognition complex subunit 5	ORC5		1.5512	0.0102
Q9Y2K2	Serine/threonine-protein kinase SIK3 OS=Homo sapiens OX=9606 GN=SIK3 PE=1 SV=4		1	500	1e+20	Serine/threonine-protein kinase SIK3	SIK3		1.5493	0.085
O75150	E3 ubiquitin-protein ligase BRE1B OS=Homo sapiens OX=9606 GN=RNF40 PE=1 SV=5	RNF40	5	1.162	0.4727	E3 ubiquitin-protein ligase BRE1B	RNF40		1.5477	0.3758
Q8IYB5	Stromal membrane-associated protein 1 OS=Homo sapiens OX=9606 GN=SMAP1 PE=1 SV=2	SMAP1	2	1.135	0.1026	Stromal membrane-associated protein 1	SMAP1		1.5474	0.0594
Q9BPY3						Protein FAM118B	FAM118B		1.5454	0.3335
Q6P587	Acylpyruvase FAHD1, mitochondrial OS=Homo sapiens OX=9606 GN=FAHD1 PE=1 SV=2	FAHD1	2	1.388	0.115	Acylpyruvase FAHD1, mitochondrial	FAHD1	3;3;3	1.5445	0.0436	Acylpyruvase FAHD1, mitochondrial	FAHD1	3	1.37686	0.240599
Q9UKD2	mRNA turnover protein 4 homolog OS=Homo sapiens OX=9606 GN=MRTO4 PE=1 SV=2	MRTO4	4	1.444	0.08193	mRNA turnover protein 4 homolog	MRTO4	4	1.5419	0.0091	mRNA turnover protein 4 homolog	MRTO4	4	1.33879	0.0237892
O75695	Protein XRP2 OS=Homo sapiens OX=9606 GN=RP2 PE=1 SV=4	RP2	7	1.582	0.03409	Protein XRP2	RP2	2	1.5406	0	Protein XRP2	RP2	2	1.3164	0.144168
Q9BY77	Polymerase delta-interacting protein 3 OS=Homo sapiens OX=9606 GN=POLDIP3 PE=1 SV=2	POLDIP3	8	1.185	0.2535	Polymerase delta-interacting protein 3	POLDIP3		1.5406	0.0027
Q96F24						Nuclear receptor-binding factor 2	NRBF2		1.5403	0.198
P51532	Transcription activator BRG1 OS=Homo sapiens OX=9606 GN=SMARCA4 PE=1 SV=2	SMARCA4	6	0.989	0.9817	Transcription activator BRG1	SMARCA4	6;6;6;6;6;6;6;6;6;6;4;4;4;3;3;3;3;3;3;3;3;2;2;2;2;2;2;2;2;2;1;1;1;1;1;1;1;1;1;1;1;1;1;1;1;1;1;1;1;1;1;1;1	1.5392	0.0379	Transcription activator BRG1	SMARCA4	6	1.45487	0.0341295
O95453	Poly(A)-specific ribonuclease PARN OS=Homo sapiens OX=9606 GN=PARN PE=1 SV=1	PARN	4	1.034	0.9043	Poly(A)-specific ribonuclease PARN	PARN		1.5378	0.0416
Q9HCS7	Pre-mRNA-splicing factor SYF1 OS=Homo sapiens OX=9606 GN=XAB2 PE=1 SV=2	XAB2	5	1.038	0.8412	Pre-mRNA-splicing factor SYF1	XAB2		1.5376	0.0529
Q14980	Nuclear mitotic apparatus protein 1 OS=Homo sapiens OX=9606 GN=NUMA1 PE=1 SV=2	NUMA1	44	1.275	0.1064	Nuclear mitotic apparatus protein 1	NUMA1	24;23;23;22;22;10;9;9;8;5;2;2;2;2;1;1;1;1;1;1	1.5347	0.0002	Nuclear mitotic apparatus protein 1	NUMA1	24	1.62084	0.00186249
A6NHX0						Cytosolic arginine sensor for mTORC1 subunit 2	CASTOR2		1.5347	0.1703
O43818	U3 small nucleolar RNA-interacting protein 2 OS=Homo sapiens OX=9606 GN=RRP9 PE=1 SV=1	RRP9	7	1.948	0.08653	U3 small nucleolar RNA-interacting protein 2	RRP9		1.5339	0.1733
A1X283	SH3 and PX domain-containing protein 2B OS=Homo sapiens OX=9606 GN=SH3PXD2B PE=1 SV=3	SH3PXD2B	10	1.135	0.409	SH3 and PX domain-containing protein 2B	SH3PXD2B	7;4;4	1.5339	0.122	SH3 and PX domain-containing protein 2B	SH3PXD2B	9	1.11329	0.346182
Q9NRL3	Striatin-4 OS=Homo sapiens OX=9606 GN=STRN4 PE=1 SV=2	STRN4	5	1.052	0.7495	Striatin-4	STRN4		1.5335	0.0465
Q9NUL5	Shiftless antiviral inhibitor of ribosomal frameshifting protein OS=Homo sapiens OX=9606 GN=SHFL PE=1 SV=2	C19orf66	1	0.946	0.6446	Shiftless antiviral inhibitor of ribosomal frameshifting protein	SHFL		1.5332	0.0158
Q9NXE4	Sphingomyelin phosphodiesterase 4 OS=Homo sapiens OX=9606 GN=SMPD4 PE=1 SV=3		5	0.978	0.8896	Sphingomyelin phosphodiesterase 4	SMPD4	6;6;6;6;6;5;5;5;5;5;5;4;3;3;3;1;1	1.5307	0.0004	Sphingomyelin phosphodiesterase 4	SMPD4	6	1.33125	0.104934
Q8IVL5	Prolyl 3-hydroxylase 2 OS=Homo sapiens OX=9606 GN=P3H2 PE=1 SV=1	LEPREL1; P3H2	11	1.47	0.0004161	Prolyl 3-hydroxylase 2	P3H2	4;4;1;1	1.5287	0.0005	Prolyl 3-hydroxylase 2	LEPREL1	4	1.58788	0.0131707
O60331						Phosphatidylinositol 4-phosphate 5-kinase type-1 gamma	PIP5K1C		1.5283	0.1882
Q9P2E3	NFX1-type zinc finger-containing protein 1 OS=Homo sapiens OX=9606 GN=ZNFX1 PE=2 SV=2	ZNFX1	4	0.926	0.8435	NFX1-type zinc finger-containing protein 1	ZNFX1	4;3;2;2;2	1.5279	0.2811	NFX1-type zinc finger-containing protein 1	ZNFX1	4	1.15929	0.145646
Q9Y3B7	39S ribosomal protein L11, mitochondrial OS=Homo sapiens OX=9606 GN=MRPL11 PE=1 SV=1	MRPL11	3	0.809		39S ribosomal protein L11, mitochondrial	MRPL11		1.5276	0.061
A6NHR9	Structural maintenance of chromosomes flexible hinge domain-containing protein 1 OS=Homo sapiens OX=9606 GN=SMCHD1 PE=1 SV=2	SMCHD1	12	1.847	0.0855	Structural maintenance of chromosomes flexible hinge domain-containing protein 1	SMCHD1	7;7;6;4	1.5275	0.0061	Structural maintenance of chromosomes flexible hinge domain-containing protein 1	SMCHD1	7	1.21676	0.132674
P62633	Cellular nucleic acid-binding protein OS=Homo sapiens OX=9606 GN=CNBP PE=1 SV=1	CNBP	3	1.223	0.3614	Cellular nucleic acid-binding protein	CNBP		1.5272	0.0196
Q9P015	39S ribosomal protein L15, mitochondrial OS=Homo sapiens OX=9606 GN=MRPL15 PE=1 SV=1	MRPL15	5	1.148	0.5446	39S ribosomal protein L15, mitochondrial	MRPL15	4;4;3	1.5241	0.3487	39S ribosomal protein L15, mitochondrial	MRPL15	4	1.00585	0.975127
Q14966	Zinc finger protein 638 OS=Homo sapiens OX=9606 GN=ZNF638 PE=1 SV=2	ZNF638	7	2.064	0.05708	Zinc finger protein 638	ZNF638	5;5;4;3;3;2;1	1.5238	0.0096	Zinc finger protein 638	ZNF638	5	1.17945	0.0684278
O95834	Echinoderm microtubule-associated protein-like 2 OS=Homo sapiens OX=9606 GN=EML2 PE=1 SV=1	EML2	3	0.905	0.4001	Echinoderm microtubule-associated protein-like 2	EML2	4;3;3;3;3;3;1;1	1.5232	0.0306	Echinoderm microtubule-associated protein-like 2	EML2	4	1.10672	0.70979
Q13425	Beta-2-syntrophin OS=Homo sapiens OX=9606 GN=SNTB2 PE=1 SV=1	SNTB2	12	1.222	0.04254	Beta-2-syntrophin	SNTB2	8;5;5;2;2;2	1.523	0.0031	Beta-2-syntrophin	SNTB2	8	1.49065	0.00863496
O14841						5-oxoprolinase	OPLAH		1.5205	0.0507
Q08AE8	Protein spire homolog 1 OS=Homo sapiens OX=9606 GN=SPIRE1 PE=1 SV=3	SPIRE1	1	0.785	0.01094	Protein spire homolog 1	SPIRE1		1.5204	0.0366
Q12923						Tyrosine-protein phosphatase non-receptor type 13	PTPN13		1.5187	0.1692
P49321	Nuclear autoantigenic sperm protein OS=Homo sapiens OX=9606 GN=NASP PE=1 SV=2	NASP	3	2.423	0.005469	Nuclear autoantigenic sperm protein	NASP		1.5182	0.052
Q92692	Nectin-2 OS=Homo sapiens OX=9606 GN=NECTIN2 PE=1 SV=1	PVRL2; NECTIN2	6	0.949	0.09484	Nectin-2	NECTIN2	5;5;4	1.5172	0.0066	Nectin-2	PVRL2	5	1.37645	0.0153506
P48730	Casein kinase I isoform delta OS=Homo sapiens OX=9606 GN=CSNK1D PE=1 SV=2	CSNK1D	2	1.254	0.4763	Casein kinase I isoform delta;Casein kinase I isoform epsilon	CSNK1D;CSNK1E		1.5167	0.0737
Q16762	Thiosulfate sulfurtransferase OS=Homo sapiens OX=9606 GN=TST PE=1 SV=4	TST	4	0.418	0.1102	Thiosulfate sulfurtransferase	TST	5;2	1.516	0.2194	Thiosulfate sulfurtransferase	TST	5	1.02791	0.90469
P84090	Enhancer of rudimentary homolog OS=Homo sapiens OX=9606 GN=ERH PE=1 SV=1	ERH	3	1.061	0.6828	Enhancer of rudimentary homolog	ERH		1.5147	0.0544
O75746	Calcium-binding mitochondrial carrier protein Aralar1 OS=Homo sapiens OX=9606 GN=SLC25A12 PE=1 SV=2	SLC25A12	10	1.183	0.4361	Calcium-binding mitochondrial carrier protein Aralar1	SLC25A12	7;5;2;2	1.5131	0.0905	Calcium-binding mitochondrial carrier protein Aralar1	SLC25A12	7	1.14372	0.53496
Q9Y3A4	Ribosomal RNA-processing protein 7 homolog A OS=Homo sapiens OX=9606 GN=RRP7A PE=1 SV=2	RRP7A	3	2.785	0.4165	Ribosomal RNA-processing protein 7 homolog A	RRP7A		1.513	0.0007
O15382	Branched-chain-amino-acid aminotransferase, mitochondrial OS=Homo sapiens OX=9606 GN=BCAT2 PE=1 SV=2	BCAT2	5	0.967	0.663	Branched-chain-amino-acid aminotransferase, mitochondrial	BCAT2		1.5124	0.3473
Q9NRX5	Serine incorporator 1 OS=Homo sapiens OX=9606 GN=SERINC1 PE=1 SV=1	SERINC1	2	1.031	0.6239	Serine incorporator 1	SERINC1		1.512	0.0313
O15381	Nuclear valosin-containing protein-like OS=Homo sapiens OX=9606 GN=NVL PE=1 SV=1	NVL	2	0.918	0.6332	Nuclear valosin-containing protein-like	NVL		1.5119	0.3289
Q5VZE5						N-alpha-acetyltransferase 35, NatC auxiliary subunit	NAA35	2	1.5118	0.4761	N-alpha-acetyltransferase 35, NatC auxiliary subunit	NAA35	2	0.930271	0.565347
P84098	60S ribosomal protein L19 OS=Homo sapiens OX=9606 GN=RPL19 PE=1 SV=1	RPL19	3	1.212	0.02657	60S ribosomal protein L19	RPL19		1.5113	0.0901
Q9H0U9						Testis-specific Y-encoded-like protein 1	TSPYL1		1.5102	0.3692
Q8NI27	THO complex subunit 2 OS=Homo sapiens OX=9606 GN=THOC2 PE=1 SV=2	THOC2	4	1.244	0.03165	THO complex subunit 2	THOC2	7;6;3;1	1.5099	0.0035	THO complex subunit 2	THOC2	7	1.29548	0.0438189
Q9Y5X1	Sorting nexin-9 OS=Homo sapiens OX=9606 GN=SNX9 PE=1 SV=1	SNX9	12	1.567	2.46e-05	Sorting nexin-9	SNX9	10;1;1	1.5065	0.0003	Sorting nexin-9	SNX9	10	1.64483	0.00487799
Q8WVT3	Trafficking protein particle complex subunit 12 OS=Homo sapiens OX=9606 GN=TRAPPC12 PE=1 SV=3	TRAPPC12	4	0.666	0.007072	Trafficking protein particle complex subunit 12	TRAPPC12		1.5054	0.2538
Q9BYD3	39S ribosomal protein L4, mitochondrial OS=Homo sapiens OX=9606 GN=MRPL4 PE=1 SV=1	MRPL4	4	0.884	0.6945	39S ribosomal protein L4, mitochondrial	MRPL4		1.5036	0.3302
Q8WUA2	Peptidyl-prolyl cis-trans isomerase-like 4 OS=Homo sapiens OX=9606 GN=PPIL4 PE=1 SV=1	PPIL4	5	1.014	0.9132	Peptidyl-prolyl cis-trans isomerase-like 4	PPIL4	5	1.5034	0.01	Peptidyl-prolyl cis-trans isomerase-like 4	PPIL4	5	1.36202	0.0106944
Q96N66	Lysophospholipid acyltransferase 7 OS=Homo sapiens OX=9606 GN=MBOAT7 PE=1 SV=2	MBOAT7	6	1.108	0.426	Lysophospholipid acyltransferase 7	MBOAT7	5;5;5;2;2	1.5031	0.0534	Lysophospholipid acyltransferase 7	MBOAT7	5	1.21935	0.354516
Q9BU89	Deoxyhypusine hydroxylase OS=Homo sapiens OX=9606 GN=DOHH PE=1 SV=1	DOHH	2	0.948	0.5956	Deoxyhypusine hydroxylase	DOHH		1.5016	0.1287
Q96S99						Pleckstrin homology domain-containing family F member 1	PLEKHF1		1.5015	0.0147
Q9NV06	DDB1- and CUL4-associated factor 13 OS=Homo sapiens OX=9606 GN=DCAF13 PE=1 SV=2	DCAF13	3	1.171	0.457	DDB1- and CUL4-associated factor 13	DCAF13		1.5005	0.0129
Q9GZT8	NIF3-like protein 1 OS=Homo sapiens OX=9606 GN=NIF3L1 PE=1 SV=2	NIF3L1	2	1.104	0.8456	NIF3-like protein 1	NIF3L1	2;1;1;1;1	1.4995	0.2607	NIF3-like protein 1	NIF3L1	2	0.964623	0.927261
O43665	Regulator of G-protein signaling 10 OS=Homo sapiens OX=9606 GN=RGS10 PE=1 SV=3		1	0.876	0.6024	Regulator of G-protein signaling 10	RGS10		1.4985	0.0693
P80723	Brain acid soluble protein 1 OS=Homo sapiens OX=9606 GN=BASP1 PE=1 SV=2	BASP1	9	1.344	0.1904	Brain acid soluble protein 1	BASP1	5;2;1	1.4973	0.0473	Brain acid soluble protein 1	BASP1	5	1.12425	0.725263
P81605						Dermcidin	DCD		1.4966	0.2914
O00148	ATP-dependent RNA helicase DDX39A OS=Homo sapiens OX=9606 GN=DDX39A PE=1 SV=2	DDX39A	14	1.101	0.8596	ATP-dependent RNA helicase DDX39A	DDX39A	10;4	1.4959	0.0859	ATP-dependent RNA helicase DDX39A	DDX39A	10	0.983762	0.955167
Q9UL03						Integrator complex subunit 6	INTS6		1.4937	0.0907
P10586	Receptor-type tyrosine-protein phosphatase F OS=Homo sapiens OX=9606 GN=PTPRF PE=1 SV=2	PTPRF	6	1.198	0.5839	Receptor-type tyrosine-protein phosphatase F	PTPRF		1.4935	0.0371
Q5TDP6						Lengsin	LGSN		1.4925	0.116
Q8WWI5	Choline transporter-like protein 1 OS=Homo sapiens OX=9606 GN=SLC44A1 PE=1 SV=1	SLC44A1	4	2.198	0.03115	Choline transporter-like protein 1	SLC44A1	3;3;3	1.4921	0.0748	Choline transporter-like protein 1	SLC44A1	3	1.19548	0.244913
P56377	AP-1 complex subunit sigma-2 OS=Homo sapiens OX=9606 GN=AP1S2 PE=1 SV=1	AP1S2	3	1.516	0.01382	AP-1 complex subunit sigma-2	AP1S2		1.4917	0.0455
Q13438	Protein OS-9 OS=Homo sapiens OX=9606 GN=OS9 PE=1 SV=1	OS9	8	1.211	0.07232	Protein OS-9	OS9	6;6;6;6;5;5;5;4;1;1	1.4916	0.209	Protein OS-9	OS9	6	1.25746	0.156155
Q8IUH3						RNA-binding protein 45	RBM45		1.4912	0.0762
Q13151	Heterogeneous nuclear ribonucleoprotein A0 OS=Homo sapiens OX=9606 GN=HNRNPA0 PE=1 SV=1	HNRNPA0	5	1.623	0.007942	Heterogeneous nuclear ribonucleoprotein A0	HNRNPA0	6	1.491	0.0065	Heterogeneous nuclear ribonucleoprotein A0	HNRNPA0	6	1.44726	0.0895879
Q7Z5L9	Interferon regulatory factor 2-binding protein 2 OS=Homo sapiens OX=9606 GN=IRF2BP2 PE=1 SV=2	IRF2BP2	2	0.764	0.1576	Interferon regulatory factor 2-binding protein 2	IRF2BP2	2;2	1.491	0.0002	Interferon regulatory factor 2-binding protein 2	IRF2BP2	2	1.24859	0.00298548
P49356						Protein farnesyltransferase subunit beta	FNTB		1.491	0.1382
O95639						Cleavage and polyadenylation specificity factor subunit 4	CPSF4		1.4906	0.2879
O43281						Embryonal Fyn-associated substrate	EFS		1.4902	0.0265
P09543	2',3'-cyclic-nucleotide 3'-phosphodiesterase OS=Homo sapiens OX=9606 GN=CNP PE=1 SV=2	CNP	11	1.252	0.04242	2',3'-cyclic-nucleotide 3'-phosphodiesterase	CNP	10;10;4;3;3;3	1.4895	0.0055	2,3-cyclic-nucleotide 3-phosphodiesterase	CNP	10	1.69216	0.00823185
Q15054						DNA polymerase delta subunit 3	POLD3		1.4892	0.2531
Q9UBP6	tRNA (guanine-N(7)-)-methyltransferase OS=Homo sapiens OX=9606 GN=METTL1 PE=1 SV=1	METTL1	2	1.632	0.3311	tRNA (guanine-N(7)-)-methyltransferase	METTL1		1.4888	0.2203
Q8N584						Tetratricopeptide repeat protein 39C	TTC39C		1.4882	0.19
P02794	Ferritin heavy chain OS=Homo sapiens OX=9606 GN=FTH1 PE=1 SV=2	FTH1	4	1.054	0.3982	Ferritin heavy chain	FTH1		1.4877	0.0253
Q9BW85						Splicing factor YJU2	YJU2		1.4864	0.0131
Q12802						A-kinase anchor protein 13	AKAP13		1.4855	0.0152
O95980	Reversion-inducing cysteine-rich protein with Kazal motifs OS=Homo sapiens OX=9606 GN=RECK PE=1 SV=1	RECK	16	1.314	0.05929	Reversion-inducing cysteine-rich protein with Kazal motifs	RECK	6	1.4852	0.0232	Reversion-inducing cysteine-rich protein with Kazal motifs	RECK	7	1.33512	0.124668
Q9NW13	RNA-binding protein 28 OS=Homo sapiens OX=9606 GN=RBM28 PE=1 SV=3	RBM28	5	1.308	0.1433	RNA-binding protein 28	RBM28	4;4;1;1	1.4826	0.0024	RNA-binding protein 28	RBM28	4	1.21754	0.168294
Q15269	Periodic tryptophan protein 2 homolog OS=Homo sapiens OX=9606 GN=PWP2 PE=2 SV=2	PWP2; LOC102724159	4	1.22	0.03515	Periodic tryptophan protein 2 homolog	PWP2	4;4;1	1.4818	0.003	Periodic tryptophan protein 2 homolog	PWP2	4	1.3605	0.0483069
P0DJ93	Small integral membrane protein 13 OS=Homo sapiens OX=9606 GN=SMIM13 PE=3 SV=1	C6orf228; SMIM13	1	0.787	0.3148	Small integral membrane protein 13	SMIM13		1.4815	0.1453
P10915	Hyaluronan and proteoglycan link protein 1 OS=Homo sapiens OX=9606 GN=HAPLN1 PE=2 SV=2	HAPLN1	3	1.847	0.3212	Hyaluronan and proteoglycan link protein 1	HAPLN1		1.4789	0.1055
Q9H8Y8	Golgi reassembly-stacking protein 2 OS=Homo sapiens OX=9606 GN=GORASP2 PE=1 SV=3	GORASP2	7	1.377	0.003142	Golgi reassembly-stacking protein 2	GORASP2	3;3;2	1.4787	0.0685	Golgi reassembly-stacking protein 2	GORASP2	3	1.11881	0.6008
Q8IYB3	Serine/arginine repetitive matrix protein 1 OS=Homo sapiens OX=9606 GN=SRRM1 PE=1 SV=2	SRRM1	4	1.135	0.6692	Serine/arginine repetitive matrix protein 1	SRRM1		1.4784	0.0196
Q03113						Guanine nucleotide-binding protein subunit alpha-12	GNA12		1.4779	0.1904
Q99808						Equilibrative nucleoside transporter 1	SLC29A1		1.4778	0.2772
Q15024	Exosome complex component RRP42 OS=Homo sapiens OX=9606 GN=EXOSC7 PE=1 SV=3	EXOSC7	5	1.738	0.2125	Exosome complex component RRP42	EXOSC7	4	1.4768	0.0738	Exosome complex component RRP42	EXOSC7	4	1.18083	0.0632913
Q9C005	Protein dpy-30 homolog OS=Homo sapiens OX=9606 GN=DPY30 PE=1 SV=1	DPY30	1	0.981	0.8791	Protein dpy-30 homolog	DPY30		1.4754	0.1107
Q14166	Tubulin--tyrosine ligase-like protein 12 OS=Homo sapiens OX=9606 GN=TTLL12 PE=1 SV=2	TTLL12	16	1.619	0.004078	Tubulin--tyrosine ligase-like protein 12	TTLL12	9	1.4748	0.0072	Tubulin--tyrosine ligase-like protein 12	TTLL12	9	1.48169	0.0252226
Q9BQ51	Programmed cell death 1 ligand 2 OS=Homo sapiens OX=9606 GN=PDCD1LG2 PE=1 SV=2	PDCD1LG2	2	0.94	0.8347	Programmed cell death 1 ligand 2	PDCD1LG2		1.474	0.0847
Q92917	G-patch domain and KOW motifs-containing protein OS=Homo sapiens OX=9606 GN=GPKOW PE=1 SV=2	GPKOW	2	1.146	0.04586	G-patch domain and KOW motifs-containing protein	GPKOW		1.4739	0.1095
Q9UKV3	Apoptotic chromatin condensation inducer in the nucleus OS=Homo sapiens OX=9606 GN=ACIN1 PE=1 SV=2	ACIN1	8	1.055	0.8088	Apoptotic chromatin condensation inducer in the nucleus	ACIN1		1.4725	0.0006
Q9H3F6	BTB/POZ domain-containing adapter for CUL3-mediated RhoA degradation protein 3 OS=Homo sapiens OX=9606 GN=KCTD10 PE=1 SV=1	KCTD10	3	1.158	0.06405	BTB/POZ domain-containing adapter for CUL3-mediated RhoA degradation protein 3	KCTD10		1.4718	0.1079
Q6STE5						SWI/SNF-related matrix-associated actin-dependent regulator of chromatin subfamily D member 3	SMARCD3		1.4697	0.0565
O14530	Thioredoxin domain-containing protein 9 OS=Homo sapiens OX=9606 GN=TXNDC9 PE=1 SV=2	TXNDC9	5	1.227	0.2507	Thioredoxin domain-containing protein 9	TXNDC9		1.4686	0.201
P08670	Vimentin OS=Homo sapiens OX=9606 GN=VIM PE=1 SV=4	VIM	70	1.177	0.0249	Vimentin	VIM	40;37;23;10;5	1.4674	0.0636	Vimentin	VIM	43	1.2464	0.00481726
O95365						Zinc finger and BTB domain-containing protein 7A	ZBTB7A		1.4664	0.1963
Q5MNZ6	WD repeat domain phosphoinositide-interacting protein 3 OS=Homo sapiens OX=9606 GN=WDR45B PE=1 SV=2	WDR45B; WDR45L	1	0.901	0.7346	WD repeat domain phosphoinositide-interacting protein 3	WDR45B		1.4658	0.0534
Q6PL24						Protein TMED8	TMED8		1.4658	0.0583
Q9UKL0	REST corepressor 1 OS=Homo sapiens OX=9606 GN=RCOR1 PE=1 SV=2	RCOR1	3	0.772	0.6091	REST corepressor 1	RCOR1	4	1.4649	0.0832	REST corepressor 1	RCOR1	4	1.28786	0.183569
Q8WU10	Pyridine nucleotide-disulfide oxidoreductase domain-containing protein 1 OS=Homo sapiens OX=9606 GN=PYROXD1 PE=1 SV=1	PYROXD1	2	0.585	0.02457	Pyridine nucleotide-disulfide oxidoreductase domain-containing protein 1	PYROXD1		1.4641	0.0801
Q9BPX3	Condensin complex subunit 3 OS=Homo sapiens OX=9606 GN=NCAPG PE=1 SV=1	NCAPG	3	1.385	0.02898	Condensin complex subunit 3	NCAPG	6;3	1.4635	0.0024	Condensin complex subunit 3	NCAPG	6	1.37159	0.0489545
Q8IWT6	Volume-regulated anion channel subunit LRRC8A OS=Homo sapiens OX=9606 GN=LRRC8A PE=1 SV=1	LRRC8A	7	0.774	0.3719	Volume-regulated anion channel subunit LRRC8A	LRRC8A	8	1.4632	0.3346	Volume-regulated anion channel subunit LRRC8A	LRRC8A	8	1.40866	0.0594418
O15056	Synaptojanin-2 OS=Homo sapiens OX=9606 GN=SYNJ2 PE=1 SV=3	SYNJ2	14	1.485	0.02259	Synaptojanin-2	SYNJ2	8;7;7;7;5;1;1	1.4623	0.0128	Synaptojanin-2	SYNJ2	8	1.44943	0.302381
Q01105	Protein SET OS=Homo sapiens OX=9606 GN=SET PE=1 SV=3	SET	8	1.254	0.0528	Protein SET	SET		1.4622	0.0141
Q9NRF9						DNA polymerase epsilon subunit 3	POLE3		1.4614	0.0268
Q9NXZ2	Probable ATP-dependent RNA helicase DDX43 OS=Homo sapiens OX=9606 GN=DDX43 PE=1 SV=2	DDX43	2	0.887	0.4107	Probable ATP-dependent RNA helicase DDX43	DDX43		1.4612	0.2188
Q01658	Protein Dr1 OS=Homo sapiens OX=9606 GN=DR1 PE=1 SV=1	DR1	2	1.445	0.1555	Protein Dr1	DR1		1.4607	0.0006
Q08170	Serine/arginine-rich splicing factor 4 OS=Homo sapiens OX=9606 GN=SRSF4 PE=1 SV=2	SRSF4	5	1.723	0.01071	Serine/arginine-rich splicing factor 4	SRSF4		1.4605	0.0421
P38432	Coilin OS=Homo sapiens OX=9606 GN=COIL PE=1 SV=1	COIL	2	1.058	0.7697	Coilin	COIL		1.4583	0.0022
Q08257	Quinone oxidoreductase OS=Homo sapiens OX=9606 GN=CRYZ PE=1 SV=1	CRYZ	8	1.273	0.05696	Quinone oxidoreductase	CRYZ	7;7;6;6;2	1.4579	0.0084	Quinone oxidoreductase	CRYZ	7	1.3429	0.00383482
P78356	Phosphatidylinositol 5-phosphate 4-kinase type-2 beta OS=Homo sapiens OX=9606 GN=PIP4K2B PE=1 SV=1	PIP4K2B	5	1.039	0.733	Phosphatidylinositol 5-phosphate 4-kinase type-2 beta	PIP4K2B		1.4572	0.1234
P16930	Fumarylacetoacetase OS=Homo sapiens OX=9606 GN=FAH PE=1 SV=2	FAH	5	1.397	0.1499	Fumarylacetoacetase	FAH	3;2;2	1.4569	0.2422	Fumarylacetoacetase	FAH	3	1.02663	0.827729
Q92688	Acidic leucine-rich nuclear phosphoprotein 32 family member B OS=Homo sapiens OX=9606 GN=ANP32B PE=1 SV=1	ANP32B	8	0.929	0.5355	Acidic leucine-rich nuclear phosphoprotein 32 family member B	ANP32B	5;5	1.4559	0.0136	Acidic leucine-rich nuclear phosphoprotein 32 family member B	ANP32B	5	1.37577	0.0837209
P25686	DnaJ homolog subfamily B member 2 OS=Homo sapiens OX=9606 GN=DNAJB2 PE=1 SV=3	DNAJB2	4	1.294	0.2735	DnaJ homolog subfamily B member 2	DNAJB2		1.4558	0.034
P43897	Elongation factor Ts, mitochondrial OS=Homo sapiens OX=9606 GN=TSFM PE=1 SV=2	TSFM	4	0.743	0.4566	Elongation factor Ts, mitochondrial	TSFM	3;2;2;1;1;1;1	1.4556	0.0043	Elongation factor Ts, mitochondrial;Elongation factor Ts	TSFM	3	1.31435	0.0128123
P10114	Ras-related protein Rap-2a OS=Homo sapiens OX=9606 GN=RAP2A PE=1 SV=1	RAP2A	2	0.946	0.6931	Ras-related protein Rap-2a	RAP2A		1.4554	0.2875
O60885	Bromodomain-containing protein 4 OS=Homo sapiens OX=9606 GN=BRD4 PE=1 SV=2	BRD4	2	0.878	0.4951	Bromodomain-containing protein 4	BRD4		1.4548	0.1328
Q6N069	N-alpha-acetyltransferase 16, NatA auxiliary subunit OS=Homo sapiens OX=9606 GN=NAA16 PE=1 SV=2	NAA16	3	1.039	0.8676	N-alpha-acetyltransferase 16, NatA auxiliary subunit	NAA16		1.4539	0.1553
Q0ZGT2	Nexilin OS=Homo sapiens OX=9606 GN=NEXN PE=1 SV=1	NEXN	8	1.92	0.002623	Nexilin	NEXN	5;4;4;4;4;3;3	1.4538	0.0689	Nexilin	NEXN	5	1.57783	0.0419204
Q6XE24	RNA-binding motif, single-stranded-interacting protein 3 OS=Homo sapiens OX=9606 GN=RBMS3 PE=1 SV=1	RBMS3	4	1.198	0.319	RNA-binding motif, single-stranded-interacting protein 3	RBMS3		1.4534	0.0063
Q8IXM6	Nurim OS=Homo sapiens OX=9606 GN=NRM PE=1 SV=1	NRM	4	1.444	0.5158	Nurim	NRM		1.4529	0.0083
P61964	WD repeat-containing protein 5 OS=Homo sapiens OX=9606 GN=WDR5 PE=1 SV=1	WDR5	4	1.676	0.1204	WD repeat-containing protein 5	WDR5	4;1	1.4518	0.0324	WD repeat-containing protein 5	WDR5	4	1.22304	0.235862
P35250	Replication factor C subunit 2 OS=Homo sapiens OX=9606 GN=RFC2 PE=1 SV=3	RFC2	4	1.293	0.03234	Replication factor C subunit 2	RFC2		1.4501	0.1177
Q14141	Septin-6 OS=Homo sapiens OX=9606 GN=SEPTIN6 PE=1 SV=4	2021-09-06	12	0.725	0.3875	Septin-6	SEPTIN6		1.4498	0.0433
P61254	60S ribosomal protein L26 OS=Homo sapiens OX=9606 GN=RPL26 PE=1 SV=1	RPL26	5	1.159	0.329	60S ribosomal protein L26;60S ribosomal protein L26-like 1	RPL26;RPL26L1		1.4483	0.1032
Q9NSV4						Protein diaphanous homolog 3	DIAPH3		1.4478	0.0644
Q6P3X3	Tetratricopeptide repeat protein 27 OS=Homo sapiens OX=9606 GN=TTC27 PE=1 SV=1	TTC27	1	500	1e+20	Tetratricopeptide repeat protein 27	TTC27		1.4456	0.1417
Q92620	Pre-mRNA-splicing factor ATP-dependent RNA helicase PRP16 OS=Homo sapiens OX=9606 GN=DHX38 PE=1 SV=2	DHX38	3	1.134	0.4269	Pre-mRNA-splicing factor ATP-dependent RNA helicase PRP16	DHX38	4;2;0;0;0;0	1.4448	0.155	Pre-mRNA-splicing factor ATP-dependent RNA helicase PRP16	DHX38	5	0.829427	0.700798
Q92785	Zinc finger protein ubi-d4 OS=Homo sapiens OX=9606 GN=DPF2 PE=1 SV=2	DPF2	3	1.663	0.08975	Zinc finger protein ubi-d4	DPF2		1.4447	0.0082
P36639	7,8-dihydro-8-oxoguanine triphosphatase OS=Homo sapiens OX=9606 GN=NUDT1 PE=1 SV=3	NUDT1	2	0.871	0.5169	7,8-dihydro-8-oxoguanine triphosphatase	NUDT1	2;2;2;2;1	1.4432	0.0012	7,8-dihydro-8-oxoguanine triphosphatase	NUDT1	2	1.59052	0.038593
Q9NRV9	Heme-binding protein 1 OS=Homo sapiens OX=9606 GN=HEBP1 PE=1 SV=1	HEBP1	4	1.187	0.2001	Heme-binding protein 1	HEBP1	4;3;3;1	1.4431	0.0384	Heme-binding protein 1	HEBP1	4	1.36064	0.204571
Q8NFP9	Neurobeachin OS=Homo sapiens OX=9606 GN=NBEA PE=1 SV=3	NBEA	2	0.949	0.743	Neurobeachin	NBEA		1.4427	0.001
Q6NXT6	Transmembrane anterior posterior transformation protein 1 homolog OS=Homo sapiens OX=9606 GN=TAPT1 PE=1 SV=1	TAPT1	4	0.002	1e+20	Transmembrane anterior posterior transformation protein 1 homolog	TAPT1	7;7;2;2	1.4426	0.162	Transmembrane anterior posterior transformation protein 1 homolog	TAPT1	7	1.53279	0.200123
Q9P0V9	Septin-10 OS=Homo sapiens OX=9606 GN=SEPTIN10 PE=1 SV=2	2021-09-10	8	3.308	0.0007517	Septin-10	SEPTIN10		1.4414	0.0725
Q9BVC6	Transmembrane protein 109 OS=Homo sapiens OX=9606 GN=TMEM109 PE=1 SV=1	TMEM109	2	0.975	0.7517	Transmembrane protein 109	TMEM109	2	1.4412	0.0989	Transmembrane protein 109	TMEM109	2	0.981621	0.906073
Q5TKA1						Protein lin-9 homolog	LIN9		1.4412	0.005
Q587I9	Vesicle transport protein SFT2C OS=Homo sapiens OX=9606 GN=SFT2D3 PE=2 SV=1	SFT2D3	2	0.952	0.6737	Vesicle transport protein SFT2C	SFT2D3		1.4411	0.0215
Q08AF3	Schlafen family member 5 OS=Homo sapiens OX=9606 GN=SLFN5 PE=1 SV=1	SLFN5	11	1.085	0.348	Schlafen family member 5	SLFN5	10;4;3	1.441	0.0052	Schlafen family member 5	SLFN5	10	1.41327	0.0425886
Q8N163	Cell cycle and apoptosis regulator protein 2 OS=Homo sapiens OX=9606 GN=CCAR2 PE=1 SV=2	CCAR2; KIAA1967	17	1.036	0.8481	Cell cycle and apoptosis regulator protein 2	CCAR2	12;12;8;8;3;3;3;3;2;2	1.4406	0.0014	Cell cycle and apoptosis regulator protein 2	CCAR2	12	1.48456	0.00852309
Q6P1J9	Parafibromin OS=Homo sapiens OX=9606 GN=CDC73 PE=1 SV=1	CDC73	7	1.26	0.4057	Parafibromin	CDC73		1.4402	0.0558
Q9BYD1	39S ribosomal protein L13, mitochondrial OS=Homo sapiens OX=9606 GN=MRPL13 PE=1 SV=1	MRPL13	2	0.941	0.8726	39S ribosomal protein L13, mitochondrial	MRPL13	3;3;2	1.438	0.1834	39S ribosomal protein L13, mitochondrial	MRPL13	3	0.997049	0.981164
O14786	Neuropilin-1 OS=Homo sapiens OX=9606 GN=NRP1 PE=1 SV=3	NRP1	5	1.36	0.2924	Neuropilin-1	NRP1		1.4378	0.0184
Q92979	Ribosomal RNA small subunit methyltransferase NEP1 OS=Homo sapiens OX=9606 GN=EMG1 PE=1 SV=4	EMG1	1	1.352	0.01734	Ribosomal RNA small subunit methyltransferase NEP1	EMG1		1.4378	0.0071
Q96A72	Protein mago nashi homolog 2 OS=Homo sapiens OX=9606 GN=MAGOHB PE=1 SV=1	MAGOHB	4	1.298	0.0789	Protein mago nashi homolog 2	MAGOHB		1.4375	0.0305
Q01780	Exosome component 10 OS=Homo sapiens OX=9606 GN=EXOSC10 PE=1 SV=2	EXOSC10	7	1.209	0.01489	Exosome component 10	EXOSC10	10;10;3	1.4371	0.0008	Exosome component 10	EXOSC10	10	1.40637	0.0309356
Q99675						Cell growth regulator with RING finger domain protein 1	CGRRF1		1.4355	0.2054
Q14331	Protein FRG1 OS=Homo sapiens OX=9606 GN=FRG1 PE=1 SV=1	FRG1	1	1.518	0.06323	Protein FRG1	FRG1		1.4347	0.0054
Q8N392	Rho GTPase-activating protein 18 OS=Homo sapiens OX=9606 GN=ARHGAP18 PE=1 SV=3	ARHGAP18	8	1.248	0.3385	Rho GTPase-activating protein 18	ARHGAP18		1.4346	0.0051
Q96GY0						Zinc finger C2HC domain-containing protein 1A	ZC2HC1A		1.4342	0.1971
Q9BWJ5	Splicing factor 3B subunit 5 OS=Homo sapiens OX=9606 GN=SF3B5 PE=1 SV=1	SF3B5	3	0.963	0.8812	Splicing factor 3B subunit 5	SF3B5		1.4334	0.3113
Q02878	60S ribosomal protein L6 OS=Homo sapiens OX=9606 GN=RPL6 PE=1 SV=3	RPL6	13	1.172	0.3435	60S ribosomal protein L6	RPL6	5;2;2;2	1.4331	0.0668	60S ribosomal protein L6	RPL6	5	1.52029	0.16382
P26358	DNA (cytosine-5)-methyltransferase 1 OS=Homo sapiens OX=9606 GN=DNMT1 PE=1 SV=2	DNMT1	5	1.041	0.4344	DNA (cytosine-5)-methyltransferase 1	DNMT1	5;5;4;2;1;1;1	1.4331	0.0409	DNA (cytosine-5)-methyltransferase 1	DNMT1	5	1.17233	0.659618
Q9NYB9						Abl interactor 2	ABI2		1.4313	0.0203
Q9Y2X9	Zinc finger protein 281 OS=Homo sapiens OX=9606 GN=ZNF281 PE=1 SV=1	ZNF281	3	1.606	0.507	Zinc finger protein 281	ZNF281		1.4308	0.096
P29372	DNA-3-methyladenine glycosylase OS=Homo sapiens OX=9606 GN=MPG PE=1 SV=3	MPG	4	1.232	0.06552	DNA-3-methyladenine glycosylase	MPG		1.4305	0.0463
O75153	Clustered mitochondria protein homolog OS=Homo sapiens OX=9606 GN=CLUH PE=1 SV=2	CLUH; KIAA0664	6	1.499	0.03768	Clustered mitochondria protein homolog	CLUH		1.4298	0.0126
Q8ND04						Protein SMG8	SMG8		1.4298	0.118
P46776	60S ribosomal protein L27a OS=Homo sapiens OX=9606 GN=RPL27A PE=1 SV=2	RPL27A	3	1.154	0.3005	60S ribosomal protein L27a	RPL27A		1.4296	0.0446
Q6RFH5	WD repeat-containing protein 74 OS=Homo sapiens OX=9606 GN=WDR74 PE=1 SV=1	WDR74	2	1.036	0.8862	WD repeat-containing protein 74	WDR74		1.4292	0.0142
Q7KZ85	Transcription elongation factor SPT6 OS=Homo sapiens OX=9606 GN=SUPT6H PE=1 SV=2	SUPT6H	9	1.259	0.1337	Transcription elongation factor SPT6	SUPT6H	8;4;1	1.4278	0.0251	Transcription elongation factor SPT6	SUPT6H	8	1.2962	0.0252266
Q14919						Dr1-associated corepressor	DRAP1		1.4278	0.3282
Q9ULA0	Aspartyl aminopeptidase OS=Homo sapiens OX=9606 GN=DNPEP PE=1 SV=2		5	1.422	0.01125	Aspartyl aminopeptidase	DNPEP		1.4277	0.0091
Q8NFZ0	F-box DNA helicase 1 OS=Homo sapiens OX=9606 GN=FBH1 PE=1 SV=2	FBXO18	2	1.007	0.9786	F-box DNA helicase 1	FBH1		1.4274	0.0125
O00139	Kinesin-like protein KIF2A OS=Homo sapiens OX=9606 GN=KIF2A PE=1 SV=3	KIF2A	6	0.887	0.7342	Kinesin-like protein KIF2A	KIF2A	3;3;3;3;3;1	1.4272	0.288	Kinesin-like protein KIF2A	KIF2A	4	0.922183	0.548814
O43294	Transforming growth factor beta-1-induced transcript 1 protein OS=Homo sapiens OX=9606 GN=TGFB1I1 PE=1 SV=2	TGFB1I1	10	1.222	0.04828	Transforming growth factor beta-1-induced transcript 1 protein	TGFB1I1	10;10;4;3;0	1.4267	0.0172	Transforming growth factor beta-1-induced transcript 1 protein	TGFB1I1	12	1.37258	0.0307247
Q9Y3X0	Coiled-coil domain-containing protein 9 OS=Homo sapiens OX=9606 GN=CCDC9 PE=1 SV=1	CCDC9	3	1.148	0.6955	Coiled-coil domain-containing protein 9	CCDC9		1.4266	0.1719
Q92636						Protein FAN	NSMAF		1.4262	0.3926
O43172	U4/U6 small nuclear ribonucleoprotein Prp4 OS=Homo sapiens OX=9606 GN=PRPF4 PE=1 SV=2	PRPF4	8	1.399	0.1165	U4/U6 small nuclear ribonucleoprotein Prp4	PRPF4	7;7	1.4259	0.1208	U4/U6 small nuclear ribonucleoprotein Prp4	PRPF4	7	1.35121	0.0255172
Q9NXW2	DnaJ homolog subfamily B member 12 OS=Homo sapiens OX=9606 GN=DNAJB12 PE=1 SV=5	DNAJB12	3	0.993	0.9564	DnaJ homolog subfamily B member 12	DNAJB12		1.4255	0.2275
P11310	Medium-chain specific acyl-CoA dehydrogenase, mitochondrial OS=Homo sapiens OX=9606 GN=ACADM PE=1 SV=1	ACADM	7	1.165	0.1399	Medium-chain specific acyl-CoA dehydrogenase, mitochondrial	ACADM		1.4248	0.0348
Q13541						Eukaryotic translation initiation factor 4E-binding protein 1	EIF4EBP1		1.4245	0.0541
P07992						DNA excision repair protein ERCC-1	ERCC1		1.4244	0.1117
O43290	U4/U6.U5 tri-snRNP-associated protein 1 OS=Homo sapiens OX=9606 GN=SART1 PE=1 SV=1	SART1	9	0.933	0.7941	U4/U6.U5 tri-snRNP-associated protein 1	SART1	4;1	1.4238	0.0279	U4/U6.U5 tri-snRNP-associated protein 1	SART1	4	1.49141	0.0910308
P55209	Nucleosome assembly protein 1-like 1 OS=Homo sapiens OX=9606 GN=NAP1L1 PE=1 SV=1	NAP1L1	11	1.27	0.0395	Nucleosome assembly protein 1-like 1	NAP1L1		1.4227	0.0181
Q8WWB7						Glycosylated lysosomal membrane protein	GLMP		1.422	0.0676
Q8TF68						Zinc finger protein 384	ZNF384		1.4213	0.0517
Q9Y6G9	Cytoplasmic dynein 1 light intermediate chain 1 OS=Homo sapiens OX=9606 GN=DYNC1LI1 PE=1 SV=3	DYNC1LI1	15	1.299	0.0008879	Cytoplasmic dynein 1 light intermediate chain 1	DYNC1LI1	12;10;1;1	1.4211	0.0001	Cytoplasmic dynein 1 light intermediate chain 1	DYNC1LI1	12	1.30064	0.00632684
Q9BQK8						Phosphatidate phosphatase LPIN3	LPIN3		1.4208	0.0154
Q9H3M7	Thioredoxin-interacting protein OS=Homo sapiens OX=9606 GN=TXNIP PE=1 SV=1	TXNIP; LOC101060503	5	1.323	0.05964	Thioredoxin-interacting protein	TXNIP	3;2	1.4207	0.006	Thioredoxin-interacting protein	TXNIP	3	1.34498	0.0708573
Q9H2K8						Serine/threonine-protein kinase TAO3	TAOK3		1.4204	0.0404
Q9BRF8	Serine/threonine-protein phosphatase CPPED1 OS=Homo sapiens OX=9606 GN=CPPED1 PE=1 SV=3	CPPED1	4	1.231	0.2877	Serine/threonine-protein phosphatase CPPED1	CPPED1		1.4203	0.2315
Q96LZ7						Regulator of microtubule dynamics protein 2	RMDN2		1.4201	0.0949
Q9H7B2	Ribosome production factor 2 homolog OS=Homo sapiens OX=9606 GN=RPF2 PE=1 SV=2	RPF2	4	1.414	0.0751	Ribosome production factor 2 homolog	RPF2		1.42	0.0274
Q08AD1	Calmodulin-regulated spectrin-associated protein 2 OS=Homo sapiens OX=9606 GN=CAMSAP2 PE=1 SV=3	CAMSAP2	3	0.859	0.0712	Calmodulin-regulated spectrin-associated protein 2	CAMSAP2		1.4193	0.2059
P52630	Signal transducer and activator of transcription 2 OS=Homo sapiens OX=9606 GN=STAT2 PE=1 SV=1	STAT2	4	1.064	0.6901	Signal transducer and activator of transcription 2	STAT2		1.4189	0.0018
Q8NI35	InaD-like protein OS=Homo sapiens OX=9606 GN=PATJ PE=1 SV=3	INADL; PATJ	1	0.995	0.9779	InaD-like protein	PATJ		1.4166	0.325
P01111	GTPase NRas OS=Homo sapiens OX=9606 GN=NRAS PE=1 SV=1	NRAS	6	1.128	0.2176	GTPase NRas	NRAS	6;1;1	1.4161	0.0507	GTPase NRas	NRAS	6	1.07763	0.544343
P27635	60S ribosomal protein L10 OS=Homo sapiens OX=9606 GN=RPL10 PE=1 SV=4	RPL10	7	1	0.994	60S ribosomal protein L10	RPL10		1.416	0.1687
Q7L775	EPM2A-interacting protein 1 OS=Homo sapiens OX=9606 GN=EPM2AIP1 PE=1 SV=1	EPM2AIP1	5	0.88	0.7423	EPM2A-interacting protein 1	EPM2AIP1	3	1.416	0.0672	EPM2A-interacting protein 1	EPM2AIP1	3	1.73749	0.0234812
P17812	CTP synthase 1 OS=Homo sapiens OX=9606 GN=CTPS1 PE=1 SV=2	CTPS1	13	1.354	0.0001089	CTP synthase 1	CTPS1		1.4156	0.002
Q9UJY4						ADP-ribosylation factor-binding protein GGA2	GGA2		1.4149	0.0449
P14174	Macrophage migration inhibitory factor OS=Homo sapiens OX=9606 GN=MIF PE=1 SV=4	MIF	3	0.908	0.6265	Macrophage migration inhibitory factor	MIF	3	1.4141	0.0189	Macrophage migration inhibitory factor	MIF	3	1.29793	0.189882
Q9NQZ2	Something about silencing protein 10 OS=Homo sapiens OX=9606 GN=UTP3 PE=1 SV=1	UTP3	2	1.275	0.01452	Something about silencing protein 10	UTP3	3	1.414	0.4597	Something about silencing protein 10	UTP3	3	1.41837	0.162408
P06493	Cyclin-dependent kinase 1 OS=Homo sapiens OX=9606 GN=CDK1 PE=1 SV=3	CDK1	3	1.092	0.523	Cyclin-dependent kinase 1	CDK1		1.414	0.2199
Q13107	Ubiquitin carboxyl-terminal hydrolase 4 OS=Homo sapiens OX=9606 GN=USP4 PE=1 SV=3	USP4	7	1.226	0.7974	Ubiquitin carboxyl-terminal hydrolase 4	USP4	8;8;5;2;2	1.4136	0.035	Ubiquitin carboxyl-terminal hydrolase 4;Ubiquitin carboxyl-terminal hydrolase	USP4	8	1.05431	0.561961
Q9Y6D5	Brefeldin A-inhibited guanine nucleotide-exchange protein 2 OS=Homo sapiens OX=9606 GN=ARFGEF2 PE=1 SV=3	ARFGEF2	9	0.995	0.9662	Brefeldin A-inhibited guanine nucleotide-exchange protein 2	ARFGEF2	5;1	1.4134	0.0404	Brefeldin A-inhibited guanine nucleotide-exchange protein 2	ARFGEF2	5	1.0236	0.912787
Q9BZJ0	Crooked neck-like protein 1 OS=Homo sapiens OX=9606 GN=CRNKL1 PE=1 SV=4	CRNKL1	7	1.012	0.8471	Crooked neck-like protein 1	CRNKL1		1.4132	0.0683
Q495W5	Alpha-(1,3)-fucosyltransferase 11 OS=Homo sapiens OX=9606 GN=FUT11 PE=1 SV=1	FUT11	3	1.213		Alpha-(1,3)-fucosyltransferase 11	FUT11	2;2	1.4118	0.0608	Alpha-(1,3)-fucosyltransferase 11	FUT11	2
Q9H900						Protein zwilch homolog	ZWILCH		1.4118	0.001
P14373						Zinc finger protein RFP	TRIM27		1.4104	0.0462
Q9UKF6	Cleavage and polyadenylation specificity factor subunit 3 OS=Homo sapiens OX=9606 GN=CPSF3 PE=1 SV=1	CPSF3	7	0.869	0.677	Cleavage and polyadenylation specificity factor subunit 3	CPSF3		1.41	0.2774
Q12788	Transducin beta-like protein 3 OS=Homo sapiens OX=9606 GN=TBL3 PE=1 SV=2	TBL3	9	1.266	0.2573	Transducin beta-like protein 3	TBL3	7;6;4	1.4099	0.0604	Transducin beta-like protein 3	TBL3	7	1.24666	0.122925
Q08752	Peptidyl-prolyl cis-trans isomerase D OS=Homo sapiens OX=9606 GN=PPID PE=1 SV=3	PPID	9	0.977	0.8707	Peptidyl-prolyl cis-trans isomerase D	PPID	6;1	1.4095	0.0252	Peptidyl-prolyl cis-trans isomerase D	PPID	6	1.05357	0.565519
P62995	Transformer-2 protein homolog beta OS=Homo sapiens OX=9606 GN=TRA2B PE=1 SV=1	TRA2B	4	1.314	0.01148	Transformer-2 protein homolog beta	TRA2B	2;2;1	1.409	0.0137	Transformer-2 protein homolog beta	TRA2B	2	1.23025	0.0667977
P14678	Small nuclear ribonucleoprotein-associated proteins B and B' OS=Homo sapiens OX=9606 GN=SNRPB PE=1 SV=2	SNRPB	6	1.001	0.9958	Small nuclear ribonucleoprotein-associated proteins B and B';Small nuclear ribonucleoprotein-associated protein N	SNRPB;SNRPN		1.409	0.0724
P04792	Heat shock protein beta-1 OS=Homo sapiens OX=9606 GN=HSPB1 PE=1 SV=2	HSPB1	10	1.198	0.05982	Heat shock protein beta-1	HSPB1	5;1	1.4088	0.0019	Heat shock protein beta-1	HSPB1	7	1.20223	0.0847371
Q9NQT4	Exosome complex component RRP46 OS=Homo sapiens OX=9606 GN=EXOSC5 PE=1 SV=1	EXOSC5	1	1.087	0.498	Exosome complex component RRP46	EXOSC5		1.4087	0.0262
O75113						NEDD4-binding protein 1	N4BP1		1.4079	0.0517
Q86VI3						Ras GTPase-activating-like protein IQGAP3	IQGAP3		1.4076	0.1295
Q9UPQ0	LIM and calponin homology domains-containing protein 1 OS=Homo sapiens OX=9606 GN=LIMCH1 PE=1 SV=4	LIMCH1	13	1.74	0.005344	LIM and calponin homology domains-containing protein 1	LIMCH1	13;13;13;13;12	1.4051	0.0052	LIM and calponin homology domains-containing protein 1	LIMCH1	13	1.35087	0.0150734
Q08117						TLE family member 5	TLE5		1.4047	0.3635
Q9H1Y0						Autophagy protein 5	ATG5		1.4037	0.2728
Q13148	TAR DNA-binding protein 43 OS=Homo sapiens OX=9606 GN=TARDBP PE=1 SV=1	TARDBP	7	0.98	0.8724	TAR DNA-binding protein 43	TARDBP		1.4036	0.0121
Q8TF66	Leucine-rich repeat-containing protein 15 OS=Homo sapiens OX=9606 GN=LRRC15 PE=2 SV=2	LRRC15	13	1.194	0.02138	Leucine-rich repeat-containing protein 15	LRRC15	10;10	1.4034	0.0004	Leucine-rich repeat-containing protein 15	LRRC15	10	1.40202	0.0284312
Q9NRG1						Phosphoribosyltransferase domain-containing protein 1	PRTFDC1		1.402	0.1466
P26373	60S ribosomal protein L13 OS=Homo sapiens OX=9606 GN=RPL13 PE=1 SV=4	RPL13	5	1.139	0.1331	60S ribosomal protein L13	RPL13	4;3;3;1	1.4014	0.0033	60S ribosomal protein L13	RPL13	4	1.32869	0.0267326
O95218	Zinc finger Ran-binding domain-containing protein 2 OS=Homo sapiens OX=9606 GN=ZRANB2 PE=1 SV=2	ZRANB2	3	0.77	0.1076	Zinc finger Ran-binding domain-containing protein 2	ZRANB2		1.4012	0.244
Q9NVN8						Guanine nucleotide-binding protein-like 3-like protein	GNL3L		1.4008	0.0245
Q6NW34						Nucleolus and neural progenitor protein	NEPRO		1.4004	0.2543
O00193						Small acidic protein	SMAP		1.399	0.0447
Q9NUW8						Tyrosyl-DNA phosphodiesterase 1	TDP1		1.3988	0.4858
Q9NX58	Cell growth-regulating nucleolar protein OS=Homo sapiens OX=9606 GN=LYAR PE=1 SV=2	LYAR	3	1.396	0.1197	Cell growth-regulating nucleolar protein	LYAR		1.3975	0.072
P63172	Dynein light chain Tctex-type 1 OS=Homo sapiens OX=9606 GN=DYNLT1 PE=1 SV=1	DYNLT1	3	0.693	0.3861	Dynein light chain Tctex-type 1	DYNLT1		1.3975	0.2423
Q9H0S4	Probable ATP-dependent RNA helicase DDX47 OS=Homo sapiens OX=9606 GN=DDX47 PE=1 SV=1	DDX47	4	1.648	0.208	Probable ATP-dependent RNA helicase DDX47	DDX47	5;5	1.3974	0.0383	Probable ATP-dependent RNA helicase DDX47	DDX47	5	1.3364	0.0195312
Q96RQ3						Methylcrotonoyl-CoA carboxylase subunit alpha, mitochondrial	MCCC1		1.3968	0.2378
Q96C86	m7GpppX diphosphatase OS=Homo sapiens OX=9606 GN=DCPS PE=1 SV=2	DCPS	7	1.236	0.08527	m7GpppX diphosphatase	DCPS		1.3964	0.0163
Q9P287	BRCA2 and CDKN1A-interacting protein OS=Homo sapiens OX=9606 GN=BCCIP PE=1 SV=1	BCCIP	2	1.092	0.5202	BRCA2 and CDKN1A-interacting protein	BCCIP		1.3962	0.0362
Q6ZT12						E3 ubiquitin-protein ligase UBR3	UBR3	6;6;2;2;2;2	1.396	0.4532	E3 ubiquitin-protein ligase UBR3	UBR3	6	1.45279	0.25148
Q9NZN5	Rho guanine nucleotide exchange factor 12 OS=Homo sapiens OX=9606 GN=ARHGEF12 PE=1 SV=1	ARHGEF12	5	0.226	0.09984	Rho guanine nucleotide exchange factor 12	ARHGEF12		1.3954	0.1201
Q9BVS4						Serine/threonine-protein kinase RIO2	RIOK2	3;3;1	1.3953	0.0737	Serine/threonine-protein kinase RIO2	RIOK2	3	0.840396	0.367732
Q8TCT7						Signal peptide peptidase-like 2B	SPPL2B		1.3953	0.1799
P35269						General transcription factor IIF subunit 1	GTF2F1		1.3944	0.077
Q15113	Procollagen C-endopeptidase enhancer 1 OS=Homo sapiens OX=9606 GN=PCOLCE PE=1 SV=2	PCOLCE	10	1.546	0.002299	Procollagen C-endopeptidase enhancer 1	PCOLCE	8	1.394	0.0007	Procollagen C-endopeptidase enhancer 1	PCOLCE	9	1.66385	0.00115621
Q8IUH5	Palmitoyltransferase ZDHHC17 OS=Homo sapiens OX=9606 GN=ZDHHC17 PE=1 SV=2	ZDHHC17	2	0.533		Palmitoyltransferase ZDHHC17	ZDHHC17	3;2;2;2;1;1;1;1	1.394	0.2643	Palmitoyltransferase ZDHHC17	ZDHHC17	3	0.813667	0.0416228
P16083	Ribosyldihydronicotinamide dehydrogenase [quinone] OS=Homo sapiens OX=9606 GN=NQO2 PE=1 SV=5	NQO2	2	1.08	0.5553	Ribosyldihydronicotinamide dehydrogenase [quinone]	NQO2		1.3937	0.2012
Q9Y5B9	FACT complex subunit SPT16 OS=Homo sapiens OX=9606 GN=SUPT16H PE=1 SV=1	SUPT16H	16	1.361	0.01892	FACT complex subunit SPT16	SUPT16H	11	1.3936	0.007	FACT complex subunit SPT16	SUPT16H	11	1.56517	0.00744246
Q8N1G2	Cap-specific mRNA (nucleoside-2'-O-)-methyltransferase 1 OS=Homo sapiens OX=9606 GN=CMTR1 PE=1 SV=1	CMTR1; FTSJD2	2	0.957	0.8776	Cap-specific mRNA (nucleoside-2'-O-)-methyltransferase 1	CMTR1	4	1.3934	0.1813	Cap-specific mRNA (nucleoside-2-O-)-methyltransferase 1	CMTR1	4	0.88254	0.506333
P29083	General transcription factor IIE subunit 1 OS=Homo sapiens OX=9606 GN=GTF2E1 PE=1 SV=2	GTF2E1	2	0.912		General transcription factor IIE subunit 1	GTF2E1		1.3925	0.0527
Q8NBJ4						Golgi membrane protein 1	GOLM1		1.392	0.2055
Q13144	Translation initiation factor eIF-2B subunit epsilon OS=Homo sapiens OX=9606 GN=EIF2B5 PE=1 SV=3	EIF2B5	7	1	0.9983	Translation initiation factor eIF-2B subunit epsilon	EIF2B5		1.3918	0.0184
Q8WWY3	U4/U6 small nuclear ribonucleoprotein Prp31 OS=Homo sapiens OX=9606 GN=PRPF31 PE=1 SV=2	PRPF31	7	1.358	0.02154	U4/U6 small nuclear ribonucleoprotein Prp31	PRPF31		1.3917	0.0083
P21926	CD9 antigen OS=Homo sapiens OX=9606 GN=CD9 PE=1 SV=4	CD9	2	0.811	0.003596	CD9 antigen	CD9		1.3917	0.1302
Q9UIV1	CCR4-NOT transcription complex subunit 7 OS=Homo sapiens OX=9606 GN=CNOT7 PE=1 SV=3	CNOT7	2	1.218	0.3069	CCR4-NOT transcription complex subunit 7	CNOT7		1.39	0.2319
Q9H2V7	Protein spinster homolog 1 OS=Homo sapiens OX=9606 GN=SPNS1 PE=1 SV=1	SPNS1	2	1.118	0.688	Protein spinster homolog 1	SPNS1		1.39	0.0188
Q6PD62	RNA polymerase-associated protein CTR9 homolog OS=Homo sapiens OX=9606 GN=CTR9 PE=1 SV=1	CTR9	4	1.364	0.01606	RNA polymerase-associated protein CTR9 homolog	CTR9	5	1.3896	0.0034	RNA polymerase-associated protein CTR9 homolog	CTR9	5	1.43539	0.0395136
P11388	DNA topoisomerase 2-alpha OS=Homo sapiens OX=9606 GN=TOP2A PE=1 SV=3	TOP2A	11	1.349	0.5309	DNA topoisomerase 2-alpha	TOP2A	10;9;9;9;2	1.3895	0.0315	DNA topoisomerase 2-alpha	TOP2A	10	1.36229	0.0848914
Q92541	RNA polymerase-associated protein RTF1 homolog OS=Homo sapiens OX=9606 GN=RTF1 PE=1 SV=4	RTF1	2	1.692	0.07004	RNA polymerase-associated protein RTF1 homolog	RTF1		1.389	0.1051
O14981	TATA-binding protein-associated factor 172 OS=Homo sapiens OX=9606 GN=BTAF1 PE=1 SV=2	BTAF1	5	1.383	0.08023	TATA-binding protein-associated factor 172	BTAF1		1.3887	0.0242
P05997	Collagen alpha-2(V) chain OS=Homo sapiens OX=9606 GN=COL5A2 PE=1 SV=3	COL5A2	17	1.361	0.02037	Collagen alpha-2(V) chain	COL5A2	11;9;1	1.3885	0.0032	Collagen alpha-2(V) chain	COL5A2	11	1.52641	0.00448823
Q15814	Tubulin-specific chaperone C OS=Homo sapiens OX=9606 GN=TBCC PE=1 SV=2	TBCC	5	1.127	0.5815	Tubulin-specific chaperone C	TBCC	4	1.3876	0.2128	Tubulin-specific chaperone C	TBCC	4	1.53219	0.187067
Q6XQN6	Nicotinate phosphoribosyltransferase OS=Homo sapiens OX=9606 GN=NAPRT PE=1 SV=2	NAPRT1; NAPRT	3	1.146	0.6781	Nicotinate phosphoribosyltransferase	NAPRT		1.3873	0.0051
Q8IWB7	WD repeat and FYVE domain-containing protein 1 OS=Homo sapiens OX=9606 GN=WDFY1 PE=1 SV=1	WDFY1	8	1.049	0.6659	WD repeat and FYVE domain-containing protein 1	WDFY1	6;3;1	1.3871	0.0037	WD repeat and FYVE domain-containing protein 1	WDFY1	6	1.45708	0.00433504
Q7LBC6						Lysine-specific demethylase 3B	KDM3B		1.3866	0.0802
Q9Y5A9	YTH domain-containing family protein 2 OS=Homo sapiens OX=9606 GN=YTHDF2 PE=1 SV=2	YTHDF2	5	0.934	0.802	YTH domain-containing family protein 2	YTHDF2		1.3857	0.2236
P19387	DNA-directed RNA polymerase II subunit RPB3 OS=Homo sapiens OX=9606 GN=POLR2C PE=1 SV=2	POLR2C	6	1.347	0.01776	DNA-directed RNA polymerase II subunit RPB3	POLR2C	2;1	1.3848	0.0201	DNA-directed RNA polymerase II subunit RPB3	POLR2C	2	1.23185	0.0652601
Q9BV23						Monoacylglycerol lipase ABHD6	ABHD6		1.3844	0.09
Q9HC84	Mucin-5B OS=Homo sapiens OX=9606 GN=MUC5B PE=1 SV=3	MUC5B	1	1.051	0.6877	Mucin-5B	MUC5B		1.3835	0.3843
Q9UBL3	Set1/Ash2 histone methyltransferase complex subunit ASH2 OS=Homo sapiens OX=9606 GN=ASH2L PE=1 SV=1	ASH2L	4	1.619	0.2317	Set1/Ash2 histone methyltransferase complex subunit ASH2	ASH2L		1.3823	0.0376
P51159	Ras-related protein Rab-27A OS=Homo sapiens OX=9606 GN=RAB27A PE=1 SV=3	RAB27A	5	1.034	0.8595	Ras-related protein Rab-27A	RAB27A		1.3811	0.0811
Q9UJX6						Anaphase-promoting complex subunit 2	ANAPC2		1.3807	0.5351
Q8NBT2	Kinetochore protein Spc24 OS=Homo sapiens OX=9606 GN=SPC24 PE=1 SV=2	SPC24	1	2.352	0.001492	Kinetochore protein Spc24	SPC24		1.3803	0.2757
O15042	U2 snRNP-associated SURP motif-containing protein OS=Homo sapiens OX=9606 GN=U2SURP PE=1 SV=2	U2SURP	7	0.891	0.559	U2 snRNP-associated SURP motif-containing protein	U2SURP	5;5;5;4;1	1.3793	0.0189	U2 snRNP-associated SURP motif-containing protein	U2SURP	5	1.14009	0.490757
Q8WYA6	Beta-catenin-like protein 1 OS=Homo sapiens OX=9606 GN=CTNNBL1 PE=1 SV=1	CTNNBL1	4	1.32	0.5366	Beta-catenin-like protein 1	CTNNBL1		1.3791	0.0172
Q63ZY3	KN motif and ankyrin repeat domain-containing protein 2 OS=Homo sapiens OX=9606 GN=KANK2 PE=1 SV=1	KANK2	18	1.412	0.002849	KN motif and ankyrin repeat domain-containing protein 2	KANK2	12;12;12;4;4;2;1	1.3787	0.0002	KN motif and ankyrin repeat domain-containing protein 2	KANK2	12	1.47831	0.0125504
Q9BSQ5	Cerebral cavernous malformations 2 protein OS=Homo sapiens OX=9606 GN=CCM2 PE=1 SV=1	CCM2	1	1.445	0.2288	Cerebral cavernous malformations 2 protein	CCM2		1.3785	0.1631
P15927	Replication protein A 32 kDa subunit OS=Homo sapiens OX=9606 GN=RPA2 PE=1 SV=1	RPA2	3	1.022	0.8499	Replication protein A 32 kDa subunit	RPA2		1.378	0.3279
P52701	DNA mismatch repair protein Msh6 OS=Homo sapiens OX=9606 GN=MSH6 PE=1 SV=2	MSH6	8	1.549	0.001866	DNA mismatch repair protein Msh6	MSH6		1.3769	0.0086
Q96C90	Protein phosphatase 1 regulatory subunit 14B OS=Homo sapiens OX=9606 GN=PPP1R14B PE=1 SV=3	PPP1R14B	4	1.095	0.7445	Protein phosphatase 1 regulatory subunit 14B	PPP1R14B	3;1;1;1;1	1.3769	0.0115	Protein phosphatase 1 regulatory subunit 14B	PPP1R14B	3	1.05357	0.75301
Q9BRJ6	Uncharacterized protein C7orf50 OS=Homo sapiens OX=9606 GN=C7orf50 PE=1 SV=1	C7orf50	4	1.372	0.00567	Uncharacterized protein C7orf50	C7orf50		1.3768	0.0043
P29353	SHC-transforming protein 1 OS=Homo sapiens OX=9606 GN=SHC1 PE=1 SV=4	SHC1	6	1.077	0.778	SHC-transforming protein 1	SHC1	4;4;4;4;3;2;2;2;2;1;1	1.3763	0.0396	SHC-transforming protein 1	SHC1	4	1.14471	0.304142
P01130	Low-density lipoprotein receptor OS=Homo sapiens OX=9606 GN=LDLR PE=1 SV=1	LDLR	2	0.865	0.5479	Low-density lipoprotein receptor	LDLR		1.3757	0.0298
Q13011	Delta(3,5)-Delta(2,4)-dienoyl-CoA isomerase, mitochondrial OS=Homo sapiens OX=9606 GN=ECH1 PE=1 SV=2	ECH1	6	1.166	0.1523	Delta(3,5)-Delta(2,4)-dienoyl-CoA isomerase, mitochondrial	ECH1	4;3;1	1.3724	0.0574	Delta(3,5)-Delta(2,4)-dienoyl-CoA isomerase, mitochondrial	ECH1	4	1.50633	0.04084
Q13873						Bone morphogenetic protein receptor type-2	BMPR2		1.3718	0.0867
Q6DN03	Putative histone H2B type 2-C OS=Homo sapiens OX=9606 GN=H2BC20P PE=5 SV=3	HIST2H2BC	3	1.343	0.004817	Putative histone H2B type 2-C;Putative histone H2B type 2-D	H2BC20P;H2BC19P		1.3715	0.0623
Q8WUP2	Filamin-binding LIM protein 1 OS=Homo sapiens OX=9606 GN=FBLIM1 PE=1 SV=2	FBLIM1	6	1.478	0.1037	Filamin-binding LIM protein 1	FBLIM1	2;2;1;1;1;1;1;1;1;1	1.3709	0.0258	Filamin-binding LIM protein 1	FBLIM1	3	1.59047	0.0607366
Q09161	Nuclear cap-binding protein subunit 1 OS=Homo sapiens OX=9606 GN=NCBP1 PE=1 SV=1	NCBP1	7	1.302	0.06954	Nuclear cap-binding protein subunit 1	NCBP1	3;1	1.3708	0.1036	Nuclear cap-binding protein subunit 1	NCBP1	3	1.75098	0.0144278
Q9UPY3	Endoribonuclease Dicer OS=Homo sapiens OX=9606 GN=DICER1 PE=1 SV=3	DICER1	5	1.561	0.1024	Endoribonuclease Dicer	DICER1	5;5;1	1.3699	0.211	Endoribonuclease Dicer	DICER1	5	0.723961	0.087616
P61020	Ras-related protein Rab-5B OS=Homo sapiens OX=9606 GN=RAB5B PE=1 SV=1	RAB5B	6	0.999	0.9951	Ras-related protein Rab-5B	RAB5B		1.3696	0.0885
Q71SY5						Mediator of RNA polymerase II transcription subunit 25	MED25		1.3696	0.3921
Q9BY43	Charged multivesicular body protein 4a OS=Homo sapiens OX=9606 GN=CHMP4A PE=1 SV=3	CHMP4A	3	0.749	0.4363	Charged multivesicular body protein 4a	CHMP4A		1.3692	0.2875
Q9BVJ6						U3 small nucleolar RNA-associated protein 14 homolog A	UTP14A	3;3;2;1;1	1.3691	0.0248	U3 small nucleolar RNA-associated protein 14 homolog A	UTP14A	3	1.07578	0.756965
Q9H2P0						Activity-dependent neuroprotector homeobox protein	ADNP		1.3691	0.2599
Q8IWB1	Inositol 1,4,5-trisphosphate receptor-interacting protein OS=Homo sapiens OX=9606 GN=ITPRIP PE=1 SV=1	ITPRIP	5	1.153	0.4258	Inositol 1,4,5-trisphosphate receptor-interacting protein	ITPRIP		1.3689	0.1201
Q9GZM8						Nuclear distribution protein nudE-like 1	NDEL1		1.3673	0.3229
O15357	Phosphatidylinositol 3,4,5-trisphosphate 5-phosphatase 2 OS=Homo sapiens OX=9606 GN=INPPL1 PE=1 SV=2	INPPL1	11	0.891	0.5593	Phosphatidylinositol 3,4,5-trisphosphate 5-phosphatase 2	INPPL1	7;6;6;2;2;1	1.3667	0.2161	Phosphatidylinositol 3,4,5-trisphosphate 5-phosphatase 2	INPPL1	7	1.0807	0.456303
Q7L211						Protein ABHD13	ABHD13		1.3663	0.2684
Q9NZJ7	Mitochondrial carrier homolog 1 OS=Homo sapiens OX=9606 GN=MTCH1 PE=1 SV=1	MTCH1	7	1.099	0.4138	Mitochondrial carrier homolog 1	MTCH1	6;6;4;1;1	1.366	0.0089	Mitochondrial carrier homolog 1	MTCH1	6	1.1442	0.360214
Q07955	Serine/arginine-rich splicing factor 1 OS=Homo sapiens OX=9606 GN=SRSF1 PE=1 SV=2	SRSF1	8	1.046	0.5926	Serine/arginine-rich splicing factor 1	SRSF1		1.3653	0.0342
Q9Y2H1	Serine/threonine-protein kinase 38-like OS=Homo sapiens OX=9606 GN=STK38L PE=1 SV=3	STK38L	4	1.143	0.6203	Serine/threonine-protein kinase 38-like	STK38L	3;2;1;1;1	1.365	0.078	Serine/threonine-protein kinase 38-like	STK38L	3	1.16042	0.545828
Q9NZZ3	Charged multivesicular body protein 5 OS=Homo sapiens OX=9606 GN=CHMP5 PE=1 SV=1	CHMP5	3	0.57	0.1121	Charged multivesicular body protein 5	CHMP5		1.3642	0.5253
P23193	Transcription elongation factor A protein 1 OS=Homo sapiens OX=9606 GN=TCEA1 PE=1 SV=2	TCEA1	6	1.176	0.4654	Transcription elongation factor A protein 1	TCEA1		1.3631	0.0926
Q9NRY6	Phospholipid scramblase 3 OS=Homo sapiens OX=9606 GN=PLSCR3 PE=1 SV=2	PLSCR3	3	0.881	0.3694	Phospholipid scramblase 3	PLSCR3	2;2;1	1.3626	0.0477	Phospholipid scramblase 3	PLSCR3;TMEM256-PLSCR3	2	1.20745	0.346163
P11233	Ras-related protein Ral-A OS=Homo sapiens OX=9606 GN=RALA PE=1 SV=1	RALA	6	0.761	0.03434	Ras-related protein Ral-A	RALA		1.3624	0.2979
Q9Y5S9	RNA-binding protein 8A OS=Homo sapiens OX=9606 GN=RBM8A PE=1 SV=1	RBM8A; LOC101060541	5	1.243	0.1967	RNA-binding protein 8A	RBM8A	3;3;1	1.3615	0.0014	RNA-binding protein 8A	RBM8A	3	1.36822	0.0106082
P49795						Regulator of G-protein signaling 19	RGS19		1.3614	0.3182
O75143						Autophagy-related protein 13	ATG13		1.3608	0.2444
Q9BQ39	ATP-dependent RNA helicase DDX50 OS=Homo sapiens OX=9606 GN=DDX50 PE=1 SV=1	DDX50	14	0.998	0.9924	ATP-dependent RNA helicase DDX50	DDX50		1.3605	0.0235
P62318	Small nuclear ribonucleoprotein Sm D3 OS=Homo sapiens OX=9606 GN=SNRPD3 PE=1 SV=1	SNRPD3	3	1.195	0.09679	Small nuclear ribonucleoprotein Sm D3	SNRPD3	3;3;1	1.3604	0.1441	Small nuclear ribonucleoprotein Sm D3	SNRPD3	3	1.356	0.0862543
Q06787	Synaptic functional regulator FMR1 OS=Homo sapiens OX=9606 GN=FMR1 PE=1 SV=1	FMR1	5	0.537	0.2466	Synaptic functional regulator FMR1	FMR1	4;4;4;4;4;4;4;4;4;4;4;4;4;4;4;3;2;2	1.3604	0.1	Fragile X mental retardation protein 1	FMR1	4	1.05348	0.720378
Q9BQB6	Vitamin K epoxide reductase complex subunit 1 OS=Homo sapiens OX=9606 GN=VKORC1 PE=1 SV=1	VKORC1	1	0.876	0.3011	Vitamin K epoxide reductase complex subunit 1	VKORC1		1.3598	0.2657
Q9NW82						WD repeat-containing protein 70	WDR70		1.3596	0.1871
P84095	Rho-related GTP-binding protein RhoG OS=Homo sapiens OX=9606 GN=RHOG PE=1 SV=1	RHOG	9	0.918	0.4337	Rho-related GTP-binding protein RhoG	RHOG	4	1.3595	0.0121	Rho-related GTP-binding protein RhoG	RHOG	4	1.21146	0.213139
P27707	Deoxycytidine kinase OS=Homo sapiens OX=9606 GN=DCK PE=1 SV=1	DCK	5	1	0.9992	Deoxycytidine kinase	DCK	6;6;3	1.3587	0.0027	Deoxycytidine kinase	DCK	6	1.34588	0.0483293
P61769	Beta-2-microglobulin OS=Homo sapiens OX=9606 GN=B2M PE=1 SV=1	B2M	1	1.035	0.8286	Beta-2-microglobulin	B2M		1.3584	0.2087
Q6UN15	Pre-mRNA 3'-end-processing factor FIP1 OS=Homo sapiens OX=9606 GN=FIP1L1 PE=1 SV=1	FIP1L1	4	1.168	0.4848	Pre-mRNA 3'-end-processing factor FIP1	FIP1L1		1.3577	0.0944
P67936	Tropomyosin alpha-4 chain OS=Homo sapiens OX=9606 GN=TPM4 PE=1 SV=3	TPM4	17	1.173	0.03899	Tropomyosin alpha-4 chain	TPM4		1.356	0.1931
P46934	E3 ubiquitin-protein ligase NEDD4 OS=Homo sapiens OX=9606 GN=NEDD4 PE=1 SV=4	NEDD4	4	1.46	0.04369	E3 ubiquitin-protein ligase NEDD4	NEDD4	7;4;4;3;3;2;2;2;2;2;2;1;1;1	1.3552	0.0063	E3 ubiquitin-protein ligase NEDD4	NEDD4	7	1.36808	0.0588286
P31942	Heterogeneous nuclear ribonucleoprotein H3 OS=Homo sapiens OX=9606 GN=HNRNPH3 PE=1 SV=2	HNRNPH3	9	1.138	0.04487	Heterogeneous nuclear ribonucleoprotein H3	HNRNPH3	4;4;4;3;3;3	1.3552	0.0094	Heterogeneous nuclear ribonucleoprotein H3	HNRNPH3	4	1.56769	0.00195552
P42336						Phosphatidylinositol 4,5-bisphosphate 3-kinase catalytic subunit alpha isoform	PIK3CA		1.3551	0.297
Q6P6C2	RNA demethylase ALKBH5 OS=Homo sapiens OX=9606 GN=ALKBH5 PE=1 SV=2	ALKBH5	1	1.082	0.454	RNA demethylase ALKBH5	ALKBH5	3;3;3	1.3541	0.1707	RNA demethylase ALKBH5	ALKBH5	3	0.977221	0.847285
O95057	GTP-binding protein Di-Ras1 OS=Homo sapiens OX=9606 GN=DIRAS1 PE=1 SV=1	DIRAS1	1	1.31	0.09068	GTP-binding protein Di-Ras1	DIRAS1		1.3535	0.0113
O60551						Glycylpeptide N-tetradecanoyltransferase 2	NMT2		1.3533	0.1255
Q8TEY7						Ubiquitin carboxyl-terminal hydrolase 33	USP33		1.3533	0.1984
O94992						Protein HEXIM1	HEXIM1		1.3528	0.4066
Q9NQ48	Leucine zipper transcription factor-like protein 1 OS=Homo sapiens OX=9606 GN=LZTFL1 PE=1 SV=1	LZTFL1	4	0.953	0.6429	Leucine zipper transcription factor-like protein 1	LZTFL1		1.3527	0.0532
Q9BYG3	MKI67 FHA domain-interacting nucleolar phosphoprotein OS=Homo sapiens OX=9606 GN=NIFK PE=1 SV=1	MKI67IP; NIFK	6	0.979	0.7848	MKI67 FHA domain-interacting nucleolar phosphoprotein	NIFK	4;1	1.3521	0.042	MKI67 FHA domain-interacting nucleolar phosphoprotein	NIFK	4	1.27457	0.294105
Q99811	Paired mesoderm homeobox protein 2 OS=Homo sapiens OX=9606 GN=PRRX2 PE=2 SV=2	PRRX2	3	1.354	0.003217	Paired mesoderm homeobox protein 2	PRRX2		1.3517	0.0106
P16591						Tyrosine-protein kinase Fer	FER		1.3512	0.234
Q2TAY7	WD40 repeat-containing protein SMU1 OS=Homo sapiens OX=9606 GN=SMU1 PE=1 SV=2	SMU1	5	1.279	0.03965	WD40 repeat-containing protein SMU1	SMU1	6;4	1.351	0.0189	WD40 repeat-containing protein SMU1;WD40 repeat-containing protein SMU1, N-terminally processed	SMU1	6	1.05233	0.362286
P36578	60S ribosomal protein L4 OS=Homo sapiens OX=9606 GN=RPL4 PE=1 SV=5	RPL4	12	1.205	0.2935	60S ribosomal protein L4	RPL4	10;7;4;3	1.351	0.1603	60S ribosomal protein L4	RPL4	11	1.36638	0.292655
Q15397	Pumilio homolog 3 OS=Homo sapiens OX=9606 GN=PUM3 PE=1 SV=3	KIAA0020; PUM3	8	1.587	0.2254	Pumilio homolog 3	PUM3	5;1	1.3498	0.0773	Pumilio domain-containing protein KIAA0020	KIAA0020	5	1.11689	0.345888
Q9Y4G8	Rap guanine nucleotide exchange factor 2 OS=Homo sapiens OX=9606 GN=RAPGEF2 PE=1 SV=1	RAPGEF2	3	1.179	0.3539	Rap guanine nucleotide exchange factor 2	RAPGEF2		1.3494	0.0375
O75352	Mannose-P-dolichol utilization defect 1 protein OS=Homo sapiens OX=9606 GN=MPDU1 PE=1 SV=2	MPDU1	2	1.04	0.8051	Mannose-P-dolichol utilization defect 1 protein	MPDU1		1.3488	0.1817
Q9BTY7						Protein HGH1 homolog	HGH1		1.3484	0.1725
Q07352	mRNA decay activator protein ZFP36L1 OS=Homo sapiens OX=9606 GN=ZFP36L1 PE=1 SV=1	ZFP36L1	1	1.113	0.6764	mRNA decay activator protein ZFP36L1	ZFP36L1		1.3479	0.0867
Q9NY12	H/ACA ribonucleoprotein complex subunit 1 OS=Homo sapiens OX=9606 GN=GAR1 PE=1 SV=1	GAR1	4	1.115	0.3819	H/ACA ribonucleoprotein complex subunit 1	GAR1	4;3	1.3475	0.0045	H/ACA ribonucleoprotein complex subunit 1	GAR1	4	1.05749	0.639825
Q9BSC4	Nucleolar protein 10 OS=Homo sapiens OX=9606 GN=NOL10 PE=1 SV=1	NOL10	4	1.065	0.7013	Nucleolar protein 10	NOL10		1.3474	0.1887
P62304	Small nuclear ribonucleoprotein E OS=Homo sapiens OX=9606 GN=SNRPE PE=1 SV=1	SNRPE	3	1.203	0.1769	Small nuclear ribonucleoprotein E	SNRPE		1.3472	0.0557
Q9NR96						Toll-like receptor 9	TLR9		1.3467	0.1738
Q49A26	Putative oxidoreductase GLYR1 OS=Homo sapiens OX=9606 GN=GLYR1 PE=1 SV=4	GLYR1	4	1.81	0.005824	Putative oxidoreductase GLYR1	GLYR1		1.3466	0.1763
Q0JRZ9	F-BAR domain only protein 2 OS=Homo sapiens OX=9606 GN=FCHO2 PE=1 SV=2	FCHO2	4	1.047	0.8953	F-BAR domain only protein 2	FCHO2	4;4;2;2;1	1.3451	0.0001	F-BAR domain only protein 2	FCHO2	4	1.28157	0.0735679
Q9NYL4	Peptidyl-prolyl cis-trans isomerase FKBP11 OS=Homo sapiens OX=9606 GN=FKBP11 PE=1 SV=1	FKBP11	5	1.047	0.5464	Peptidyl-prolyl cis-trans isomerase FKBP11	FKBP11		1.3436	0.0719
P53814	Smoothelin OS=Homo sapiens OX=9606 GN=SMTN PE=1 SV=7	SMTN	10	1.135	0.1881	Smoothelin	SMTN		1.3431	0.0192
P62875	DNA-directed RNA polymerases I, II, and III subunit RPABC5 OS=Homo sapiens OX=9606 GN=POLR2L PE=1 SV=1	POLR2L	1	1.042	0.8307	DNA-directed RNA polymerases I, II, and III subunit RPABC5	POLR2L		1.3425	0.097
Q92609	TBC1 domain family member 5 OS=Homo sapiens OX=9606 GN=TBC1D5 PE=1 SV=1	TBC1D5	4	0.371	0.0001897	TBC1 domain family member 5	TBC1D5	5;5;3	1.3419	0.1064	TBC1 domain family member 5	TBC1D5	5	0.861122	0.151319
O14618	Copper chaperone for superoxide dismutase OS=Homo sapiens OX=9606 GN=CCS PE=1 SV=1	CCS	3	1.072	0.9275	Copper chaperone for superoxide dismutase	CCS		1.3418	0.2966
Q96RF0	Sorting nexin-18 OS=Homo sapiens OX=9606 GN=SNX18 PE=1 SV=2	SNX18	9	0.982	0.9171	Sorting nexin-18	SNX18	4;4;4	1.3417	0.0111	Sorting nexin-18	SNX18	4	1.33613	0.137019
Q9BSR8	Protein YIPF4 OS=Homo sapiens OX=9606 GN=YIPF4 PE=1 SV=1	YIPF4	2	0.811	0.2552	Protein YIPF4	YIPF4		1.341	0.0228
Q7L576	Cytoplasmic FMR1-interacting protein 1 OS=Homo sapiens OX=9606 GN=CYFIP1 PE=1 SV=1	CYFIP1	23	1.19	0.01841	Cytoplasmic FMR1-interacting protein 1	CYFIP1	15;10;8;8;7;3;1;1	1.3401	0.0025	Cytoplasmic FMR1-interacting protein 1	CYFIP1	15	1.3484	0.00806023
O95685						Protein phosphatase 1 regulatory subunit 3D	PPP1R3D		1.3398	0.352
P13798	Acylamino-acid-releasing enzyme OS=Homo sapiens OX=9606 GN=APEH PE=1 SV=4	APEH	9	1.041	0.5246	Acylamino-acid-releasing enzyme	APEH		1.3396	0.0408
Q9UMS0	NFU1 iron-sulfur cluster scaffold homolog, mitochondrial OS=Homo sapiens OX=9606 GN=NFU1 PE=1 SV=2	NFU1	1	1.245	0.2574	NFU1 iron-sulfur cluster scaffold homolog, mitochondrial	NFU1		1.3395	0.274
Q13636	Ras-related protein Rab-31 OS=Homo sapiens OX=9606 GN=RAB31 PE=1 SV=1	RAB31	8	1.109	0.6607	Ras-related protein Rab-31	RAB31	4;2	1.3379	0.0491	Ras-related protein Rab-31	RAB31	4	1.37938	0.0241061
A4D1P6						WD repeat-containing protein 91	WDR91		1.3376	0.3002
Q99836	Myeloid differentiation primary response protein MyD88 OS=Homo sapiens OX=9606 GN=MYD88 PE=1 SV=1	MYD88	5	1.31	0.1423	Myeloid differentiation primary response protein MyD88	MYD88		1.3375	0.1081
P48454	Serine/threonine-protein phosphatase 2B catalytic subunit gamma isoform OS=Homo sapiens OX=9606 GN=PPP3CC PE=1 SV=3	PPP3CC	3	1.174	0.3587	Serine/threonine-protein phosphatase 2B catalytic subunit gamma isoform	PPP3CC		1.3375	0.2277
Q9UNQ2	Probable dimethyladenosine transferase OS=Homo sapiens OX=9606 GN=DIMT1 PE=1 SV=1	DIMT1	4	0.841	0.5698	Probable dimethyladenosine transferase	DIMT1		1.3366	0.1172
Q9Y2U5						Mitogen-activated protein kinase kinase kinase 2	MAP3K2		1.336	0.0888
P54289	Voltage-dependent calcium channel subunit alpha-2/delta-1 OS=Homo sapiens OX=9606 GN=CACNA2D1 PE=1 SV=3	CACNA2D1	18	0.985	0.9258	Voltage-dependent calcium channel subunit alpha-2/delta-1	CACNA2D1	8;8;7;7;7;3;2;0;0;0;0;0;0;0	1.3359	0.0887	Voltage-dependent calcium channel subunit alpha-2/delta-1;Voltage-dependent calcium channel subunit alpha-2-1;Voltage-dependent calcium channel subunit delta-1	CACNA2D1	9	1.15368	0.206787
Q14498	RNA-binding protein 39 OS=Homo sapiens OX=9606 GN=RBM39 PE=1 SV=2	RBM39	8	1.065	0.3219	RNA-binding protein 39	RBM39	7;7;7;6;6;6;3;3;1;0;0;0;0;0;0	1.335	0.0019	RNA-binding protein 39	RBM39	8	1.32204	0.0209997
Q9H814						Phosphorylated adapter RNA export protein	PHAX		1.3348	0.0309
P62910	60S ribosomal protein L32 OS=Homo sapiens OX=9606 GN=RPL32 PE=1 SV=2	RPL32	4	0.964	0.8961	60S ribosomal protein L32	RPL32		1.3343	0.1094
Q9BXR0						Queuine tRNA-ribosyltransferase catalytic subunit 1	QTRT1		1.3337	0.1577
Q14011	Cold-inducible RNA-binding protein OS=Homo sapiens OX=9606 GN=CIRBP PE=1 SV=1	CIRBP	4	1.112	0.0886	Cold-inducible RNA-binding protein	CIRBP		1.333	0.0185
P86790	Vacuolar fusion protein CCZ1 homolog B OS=Homo sapiens OX=9606 GN=CCZ1B PE=1 SV=1	CCZ1; CCZ1B	3	0.581		Vacuolar fusion protein CCZ1 homolog B;Vacuolar fusion protein CCZ1 homolog	CCZ1B;CCZ1	5;5;1	1.333	0.0536	Vacuolar fusion protein CCZ1 homolog B;Vacuolar fusion protein CCZ1 homolog	CCZ1B;CCZ1	5	0.931829	0.761564
P35637	RNA-binding protein FUS OS=Homo sapiens OX=9606 GN=FUS PE=1 SV=1	FUS	5	1.285	0.09251	RNA-binding protein FUS	FUS		1.3327	0.005
Q9GZL7	Ribosome biogenesis protein WDR12 OS=Homo sapiens OX=9606 GN=WDR12 PE=1 SV=2	WDR12	8	1.183	0.3618	Ribosome biogenesis protein WDR12	WDR12	3	1.3326	0.0211	Ribosome biogenesis protein WDR12	WDR12	3	1.06773	0.382432
P61962	DDB1- and CUL4-associated factor 7 OS=Homo sapiens OX=9606 GN=DCAF7 PE=1 SV=1	DCAF7	4	1.294	0.04346	DDB1- and CUL4-associated factor 7	DCAF7	2;1;1	1.3322	0.1489	DDB1- and CUL4-associated factor 7	DCAF7	2
P46777	60S ribosomal protein L5 OS=Homo sapiens OX=9606 GN=RPL5 PE=1 SV=3	RPL5	11	1.155	0.2898	60S ribosomal protein L5	RPL5		1.3319	0.3318
P22676	Calretinin OS=Homo sapiens OX=9606 GN=CALB2 PE=2 SV=2	CALB2	2	0.738	0.0692	Calretinin	CALB2		1.3317	0.1087
Q14BN4						Sarcolemmal membrane-associated protein	SLMAP		1.3316	0.2219
O75600	2-amino-3-ketobutyrate coenzyme A ligase, mitochondrial OS=Homo sapiens OX=9606 GN=GCAT PE=1 SV=1	GCAT	3	1.372	0.2449	2-amino-3-ketobutyrate coenzyme A ligase, mitochondrial	GCAT		1.3313	0.1738
Q9NU22						Midasin	MDN1	3;1	1.3311	0.3053	Midasin	MDN1	3	1.2725	0.208688
Q13247	Serine/arginine-rich splicing factor 6 OS=Homo sapiens OX=9606 GN=SRSF6 PE=1 SV=2	SRSF6	6	1.291	0.03572	Serine/arginine-rich splicing factor 6	SRSF6		1.3307	0.0073
Q96DX4	RING finger and SPRY domain-containing protein 1 OS=Homo sapiens OX=9606 GN=RSPRY1 PE=1 SV=1	RSPRY1	2	1.022	0.9519	RING finger and SPRY domain-containing protein 1	RSPRY1	3;1;1;1;1	1.3304	0.2617	RING finger and SPRY domain-containing protein 1	RSPRY1	3	0.779388	0.612176
P0CG39	POTE ankyrin domain family member J OS=Homo sapiens OX=9606 GN=POTEJ PE=3 SV=1	POTEJ	8	0.949	0.7695	POTE ankyrin domain family member J	POTEJ		1.3304	0.3694
P28370	Probable global transcription activator SNF2L1 OS=Homo sapiens OX=9606 GN=SMARCA1 PE=1 SV=2	SMARCA1	11	1.488	0.15	Probable global transcription activator SNF2L1	SMARCA1		1.3301	0.0103
Q13409	Cytoplasmic dynein 1 intermediate chain 2 OS=Homo sapiens OX=9606 GN=DYNC1I2 PE=1 SV=3	DYNC1I2	11	1.215	0.01865	Cytoplasmic dynein 1 intermediate chain 2	DYNC1I2	5;5;5;5;4;4;4;4;3;3;3;2;2;1;1;1;1;1	1.3301	0.0045	Cytoplasmic dynein 1 intermediate chain 2	DYNC1I2	5	1.32411	0.0741733
Q9UJX4	Anaphase-promoting complex subunit 5 OS=Homo sapiens OX=9606 GN=ANAPC5 PE=1 SV=2	ANAPC5	1	1.159	0.4229	Anaphase-promoting complex subunit 5	ANAPC5		1.3294	0.3368
Q13547						Histone deacetylase 1	HDAC1	4;2	1.3289	0.0408	Histone deacetylase 1	HDAC1	4	1.29088	0.213551
O00462	Beta-mannosidase OS=Homo sapiens OX=9606 GN=MANBA PE=1 SV=3	MANBA	6	1.624	0.1286	Beta-mannosidase	MANBA		1.3282	0.1778
P06132	Uroporphyrinogen decarboxylase OS=Homo sapiens OX=9606 GN=UROD PE=1 SV=2	UROD	6	1.149	0.06484	Uroporphyrinogen decarboxylase	UROD		1.3277	0.0498
Q9NP97	Dynein light chain roadblock-type 1 OS=Homo sapiens OX=9606 GN=DYNLRB1 PE=1 SV=3	DYNLRB1	3	1.126	0.271	Dynein light chain roadblock-type 1	DYNLRB1		1.3277	0.0465
P18754	Regulator of chromosome condensation OS=Homo sapiens OX=9606 GN=RCC1 PE=1 SV=1	RCC1	11	1.347	0.001285	Regulator of chromosome condensation	RCC1		1.3276	0.0259
Q5VTR2	E3 ubiquitin-protein ligase BRE1A OS=Homo sapiens OX=9606 GN=RNF20 PE=1 SV=2	RNF20	4	1.615	0.11	E3 ubiquitin-protein ligase BRE1A	RNF20	4;1;1	1.3275	0.0129	E3 ubiquitin-protein ligase BRE1A	RNF20	4	1.12613	0.421952
Q99575	Ribonucleases P/MRP protein subunit POP1 OS=Homo sapiens OX=9606 GN=POP1 PE=1 SV=2	POP1	5	0.909	0.3126	Ribonucleases P/MRP protein subunit POP1	POP1	2	1.3274	0.4269	Ribonucleases P/MRP protein subunit POP1	POP1	2	0.899594	0.66094
Q9P0K7	Ankycorbin OS=Homo sapiens OX=9606 GN=RAI14 PE=1 SV=2	RAI14	22	1.109	0.2763	Ankycorbin	RAI14	11;11;11;11	1.3272	0	Ankycorbin	RAI14	11	1.46108	0.00349532
Q9H9Q2	COP9 signalosome complex subunit 7b OS=Homo sapiens OX=9606 GN=COPS7B PE=1 SV=1	COPS7B	3	0.809	0.1544	COP9 signalosome complex subunit 7b	COPS7B		1.3272	0.5287
Q9UDY8	Mucosa-associated lymphoid tissue lymphoma translocation protein 1 OS=Homo sapiens OX=9606 GN=MALT1 PE=1 SV=1	MALT1	8	1.544	0.01688	Mucosa-associated lymphoid tissue lymphoma translocation protein 1	MALT1	5;5;3;2;1	1.327	0.0029	Mucosa-associated lymphoid tissue lymphoma translocation protein 1	MALT1	5	1.22507	0.154742
O60266						Adenylate cyclase type 3	ADCY3		1.3265	0.2906
O14498	Immunoglobulin superfamily containing leucine-rich repeat protein OS=Homo sapiens OX=9606 GN=ISLR PE=2 SV=1	ISLR	6	0.916	0.3076	Immunoglobulin superfamily containing leucine-rich repeat protein	ISLR	2;1;1	1.3255	0.0418	Immunoglobulin superfamily containing leucine-rich repeat protein	ISLR	2	1.37534	0.0628698
Q9P121	Neurotrimin OS=Homo sapiens OX=9606 GN=NTM PE=1 SV=1	NTM	1	0.852	0.2188	Neurotrimin	NTM		1.3252	0.3944
Q14320	Protein FAM50A OS=Homo sapiens OX=9606 GN=FAM50A PE=1 SV=2	FAM50A	5	2.01	0.0007345	Protein FAM50A	FAM50A		1.3249	0.0117
Q8ND76	Cyclin-Y OS=Homo sapiens OX=9606 GN=CCNY PE=1 SV=2	CCNY	4	0.933	0.2457	Cyclin-Y	CCNY		1.3248	0.5422
P61916	NPC intracellular cholesterol transporter 2 OS=Homo sapiens OX=9606 GN=NPC2 PE=1 SV=1	NPC2	4	0.604	0.1801	NPC intracellular cholesterol transporter 2	NPC2		1.3248	0.3427
Q99986	Serine/threonine-protein kinase VRK1 OS=Homo sapiens OX=9606 GN=VRK1 PE=1 SV=1	VRK1	3	1.553	0.0839	Serine/threonine-protein kinase VRK1	VRK1		1.3235	0.3181
P35610	Sterol O-acyltransferase 1 OS=Homo sapiens OX=9606 GN=SOAT1 PE=1 SV=3	SOAT1	3	0.705	0.5067	Sterol O-acyltransferase 1	SOAT1		1.3231	0.4266
Q9BZZ5	Apoptosis inhibitor 5 OS=Homo sapiens OX=9606 GN=API5 PE=1 SV=3	API5	11	1.116	0.1562	Apoptosis inhibitor 5	API5	8;7;7;7;6;6;5;3;2	1.323	0.0276	Apoptosis inhibitor 5	API5	8	1.3134	0.0589583
Q8IWX8	Calcium homeostasis endoplasmic reticulum protein OS=Homo sapiens OX=9606 GN=CHERP PE=1 SV=3	CHERP	5	0.966	0.7371	Calcium homeostasis endoplasmic reticulum protein	CHERP		1.3222	0.212
Q86WA8	Lon protease homolog 2, peroxisomal OS=Homo sapiens OX=9606 GN=LONP2 PE=1 SV=1	LONP2	2	0.549	0.3523	Lon protease homolog 2, peroxisomal	LONP2	4;3;3;2;2	1.3216	0.0319	Lon protease homolog 2, peroxisomal	LONP2	4	1.25383	0.0541262
Q9P0J7	E3 ubiquitin-protein ligase KCMF1 OS=Homo sapiens OX=9606 GN=KCMF1 PE=1 SV=2	KCMF1	2	0.851	0.2664	E3 ubiquitin-protein ligase KCMF1	KCMF1		1.3207	0.1482
O60264	SWI/SNF-related matrix-associated actin-dependent regulator of chromatin subfamily A member 5 OS=Homo sapiens OX=9606 GN=SMARCA5 PE=1 SV=1	SMARCA5	18	1.482	0.01543	SWI/SNF-related matrix-associated actin-dependent regulator of chromatin subfamily A member 5	SMARCA5	9	1.3205	0.0249	SWI/SNF-related matrix-associated actin-dependent regulator of chromatin subfamily A member 5	SMARCA5	9	1.50395	0.00109041
P48059	LIM and senescent cell antigen-like-containing domain protein 1 OS=Homo sapiens OX=9606 GN=LIMS1 PE=1 SV=4	LIMS1	9	1.25	0.1084	LIM and senescent cell antigen-like-containing domain protein 1	LIMS1		1.32	0.0339
Q96T60	Bifunctional polynucleotide phosphatase/kinase OS=Homo sapiens OX=9606 GN=PNKP PE=1 SV=1	PNKP	6	2.26	0.0201	Bifunctional polynucleotide phosphatase/kinase	PNKP		1.3195	0.0573
Q9BSV6						tRNA-splicing endonuclease subunit Sen34	TSEN34		1.3195	0.2117
Q86W42	THO complex subunit 6 homolog OS=Homo sapiens OX=9606 GN=THOC6 PE=1 SV=1	THOC6	5	1.547	0.1052	THO complex subunit 6 homolog	THOC6	4;4;4	1.319	0.028	THO complex subunit 6 homolog	THOC6	4	1.66957	0.0403431
Q9BRJ7	Tudor-interacting repair regulator protein OS=Homo sapiens OX=9606 GN=NUDT16L1 PE=1 SV=1	NUDT16L1	4	1.025	0.9389	Tudor-interacting repair regulator protein	NUDT16L1		1.3189	0.1495
Q15428	Splicing factor 3A subunit 2 OS=Homo sapiens OX=9606 GN=SF3A2 PE=1 SV=2	SF3A2	2	1.153	0.121	Splicing factor 3A subunit 2	SF3A2		1.3188	0.0064
P50579	Methionine aminopeptidase 2 OS=Homo sapiens OX=9606 GN=METAP2 PE=1 SV=1	METAP2	10	1.095	0.5378	Methionine aminopeptidase 2	METAP2	4;4;3;3;3;1;1;1	1.3184	0.0851	Methionine aminopeptidase 2	METAP2	4	0.999525	0.997742
Q96B26	Exosome complex component RRP43 OS=Homo sapiens OX=9606 GN=EXOSC8 PE=1 SV=1	EXOSC8	4	2.391	0.000338	Exosome complex component RRP43	EXOSC8	3	1.318	0.0048	Exosome complex component RRP43	EXOSC8	3	1.31835	0.0079977
P30260	Cell division cycle protein 27 homolog OS=Homo sapiens OX=9606 GN=CDC27 PE=1 SV=2	CDC27	4	0.98	0.9873	Cell division cycle protein 27 homolog	CDC27		1.3169	0.3079
P78330	Phosphoserine phosphatase OS=Homo sapiens OX=9606 GN=PSPH PE=1 SV=2	PSPH	4	0.993	0.954	Phosphoserine phosphatase	PSPH		1.3166	0.1624
Q96ME7	Zinc finger protein 512 OS=Homo sapiens OX=9606 GN=ZNF512 PE=1 SV=2	ZNF512	2	1.012	0.9707	Zinc finger protein 512	ZNF512		1.3163	0.0238
Q99729	Heterogeneous nuclear ribonucleoprotein A/B OS=Homo sapiens OX=9606 GN=HNRNPAB PE=1 SV=2	HNRNPAB	6	1.238	0.0884	Heterogeneous nuclear ribonucleoprotein A/B	HNRNPAB	8;7	1.3161	0.0396	Heterogeneous nuclear ribonucleoprotein A/B	HNRNPAB	8	1.18343	0.297417
Q9BZF1	Oxysterol-binding protein-related protein 8 OS=Homo sapiens OX=9606 GN=OSBPL8 PE=1 SV=3	OSBPL8	19	1.296	0.004584	Oxysterol-binding protein-related protein 8	OSBPL8	13;13;13;11;10;1;1;1	1.3157	0.0074	Oxysterol-binding protein-related protein 8;Oxysterol-binding protein	OSBPL8	14	1.34529	0.0643232
O00562						Membrane-associated phosphatidylinositol transfer protein 1	PITPNM1		1.3156	0.2903
Q8IZP0	Abl interactor 1 OS=Homo sapiens OX=9606 GN=ABI1 PE=1 SV=4	ABI1	8	1.007	0.9404	Abl interactor 1	ABI1	5;5;5;5;5;5;5;5;5;5;5;5;4;4;1;1;1	1.3155	0.0166	Abl interactor 1	ABI1	6	1.30237	0.0457117
Q8IUF8	Ribosomal oxygenase 2 OS=Homo sapiens OX=9606 GN=RIOX2 PE=1 SV=1	MINA; RIOX2	1	1.592	0.3572	Ribosomal oxygenase 2	RIOX2	3;2;2;1;1	1.3153	0.2936	Bifunctional lysine-specific demethylase and histidyl-hydroxylase MINA	MINA	3	1.14856	0.534821
Q14692	Ribosome biogenesis protein BMS1 homolog OS=Homo sapiens OX=9606 GN=BMS1 PE=1 SV=1	BMS1	7	0.948	0.5766	Ribosome biogenesis protein BMS1 homolog	BMS1	7	1.315	0.0484	Ribosome biogenesis protein BMS1 homolog	BMS1	7	1.211	0.186023
Q99543	DnaJ homolog subfamily C member 2 OS=Homo sapiens OX=9606 GN=DNAJC2 PE=1 SV=4	DNAJC2	5	1.941	0.4485	DnaJ homolog subfamily C member 2	DNAJC2	3;3;2;2	1.3144	0.2103	DnaJ homolog subfamily C member 2;DnaJ homolog subfamily C member 2, N-terminally processed	DNAJC2	3	1.39691	0.309977
Q9NX61	Transmembrane protein 161A OS=Homo sapiens OX=9606 GN=TMEM161A PE=1 SV=1	TMEM161A	1	1.172	0.5566	Transmembrane protein 161A	TMEM161A		1.3144	0.2906
Q06265	Exosome complex component RRP45 OS=Homo sapiens OX=9606 GN=EXOSC9 PE=1 SV=3	EXOSC9	5	1.091	0.4407	Exosome complex component RRP45	EXOSC9		1.3142	0.2472
Q9GZT4	Serine racemase OS=Homo sapiens OX=9606 GN=SRR PE=1 SV=1	SRR	4	1.176	0.2347	Serine racemase	SRR	3;2;1;1;1;1	1.3135	0.0541	Serine racemase	SRR	3	1.08022	0.5617
Q13523	Serine/threonine-protein kinase PRP4 homolog OS=Homo sapiens OX=9606 GN=PRPF4B PE=1 SV=3	PRPF4B	9	1.229	0.28	Serine/threonine-protein kinase PRP4 homolog	PRPF4B	4;3	1.3132	0.0123	Serine/threonine-protein kinase PRP4 homolog	PRPF4B	4	1.13468	0.318006
P27694	Replication protein A 70 kDa DNA-binding subunit OS=Homo sapiens OX=9606 GN=RPA1 PE=1 SV=2	RPA1	14	1.108	0.364	Replication protein A 70 kDa DNA-binding subunit	RPA1	6;4	1.3132	0.0082	Replication protein A 70 kDa DNA-binding subunit;Replication protein A 70 kDa DNA-binding subunit, N-terminally processed	RPA1	6	1.27452	0.0983974
Q15276						Rab GTPase-binding effector protein 1	RABEP1		1.3132	0.6112
Q5QJE6						Deoxynucleotidyltransferase terminal-interacting protein 2	DNTTIP2		1.3126	0.0555
P55061	Bax inhibitor 1 OS=Homo sapiens OX=9606 GN=TMBIM6 PE=1 SV=2	TMBIM6	1	1.334	0.014	Bax inhibitor 1	TMBIM6		1.3125	0.021
Q9H1C4	Protein unc-93 homolog B1 OS=Homo sapiens OX=9606 GN=UNC93B1 PE=1 SV=2	UNC93B1	2	1.141	0.4052	Protein unc-93 homolog B1	UNC93B1		1.3124	0.1303
Q08945	FACT complex subunit SSRP1 OS=Homo sapiens OX=9606 GN=SSRP1 PE=1 SV=1	SSRP1	16	1.545	0.01008	FACT complex subunit SSRP1	SSRP1	11;4;2	1.3118	0.0015	FACT complex subunit SSRP1	SSRP1	11	1.45742	0.00730645
O95777	U6 snRNA-associated Sm-like protein LSm8 OS=Homo sapiens OX=9606 GN=LSM8 PE=1 SV=3	NAA38; LSM8	2	0.853	0.4968	U6 snRNA-associated Sm-like protein LSm8	LSM8		1.3109	0.0587
P42167	Lamina-associated polypeptide 2, isoforms beta/gamma OS=Homo sapiens OX=9606 GN=TMPO PE=1 SV=2	TMPO	10	1.211	0.2751	Lamina-associated polypeptide 2, isoforms beta/gamma	TMPO	11;9;8;7;5	1.3108	0.0449	Lamina-associated polypeptide 2, isoforms beta/gamma;Thymopoietin;Thymopentin	TMPO	12	1.24361	0.0821985
Q9NZI7	Upstream-binding protein 1 OS=Homo sapiens OX=9606 GN=UBP1 PE=1 SV=1	UBP1	3	3.241	0.5054	Upstream-binding protein 1	UBP1		1.3105	0.4234
O15031	Plexin-B2 OS=Homo sapiens OX=9606 GN=PLXNB2 PE=1 SV=3	PLXNB2	30	1.195	0.01462	Plexin-B2	PLXNB2	15;3;3;1;1;1	1.3101	0.004	Plexin-B2	PLXNB2	16	1.31162	0.0751815
Q14684	Ribosomal RNA processing protein 1 homolog B OS=Homo sapiens OX=9606 GN=RRP1B PE=1 SV=3	RRP1B	1	1.116	0.5234	Ribosomal RNA processing protein 1 homolog B	RRP1B		1.3092	0.4376
O15067	Phosphoribosylformylglycinamidine synthase OS=Homo sapiens OX=9606 GN=PFAS PE=1 SV=4	PFAS	14	1.315	0.04991	Phosphoribosylformylglycinamidine synthase	PFAS	7;2;1;1;1;1	1.309	0.0687	Phosphoribosylformylglycinamidine synthase	PFAS	8	1.21961	0.0680444
Q9UKV5						E3 ubiquitin-protein ligase AMFR	AMFR		1.3087	0.6232
O14787	Transportin-2 OS=Homo sapiens OX=9606 GN=TNPO2 PE=1 SV=3	TNPO2	6	0.996	0.9944	Transportin-2	TNPO2	6;5;5;2	1.3085	0.1624	Transportin-2	TNPO2	7	1.25833	0.136214
Q8NCG7	Diacylglycerol lipase-beta OS=Homo sapiens OX=9606 GN=DAGLB PE=1 SV=2	DAGLB	4	1.21	0.2456	Diacylglycerol lipase-beta	DAGLB		1.3081	0.1316
P62249	40S ribosomal protein S16 OS=Homo sapiens OX=9606 GN=RPS16 PE=1 SV=2	RPS16	9	1.147	0.2801	40S ribosomal protein S16	RPS16	6;3;3;2	1.308	0.2175	40S ribosomal protein S16	RPS16	7	1.12975	0.572259
Q9GZT9	Egl nine homolog 1 OS=Homo sapiens OX=9606 GN=EGLN1 PE=1 SV=1	EGLN1	5	1.067	0.6419	Egl nine homolog 1	EGLN1		1.3076	0.6489
Q2NL82	Pre-rRNA-processing protein TSR1 homolog OS=Homo sapiens OX=9606 GN=TSR1 PE=1 SV=1	TSR1	5	1.614	0.159	Pre-rRNA-processing protein TSR1 homolog	TSR1	3;1	1.3074	0.0317	Pre-rRNA-processing protein TSR1 homolog	TSR1	3	1.34841	0.0756711
Q15035	Translocating chain-associated membrane protein 2 OS=Homo sapiens OX=9606 GN=TRAM2 PE=1 SV=1	TRAM2	1	0.95	0.6928	Translocating chain-associated membrane protein 2	TRAM2		1.3074	0.5477
Q9HC38	Glyoxalase domain-containing protein 4 OS=Homo sapiens OX=9606 GN=GLOD4 PE=1 SV=1	GLOD4	6	1.118	0.2757	Glyoxalase domain-containing protein 4	GLOD4		1.307	0.0849
P60520						Gamma-aminobutyric acid receptor-associated protein-like 2	GABARAPL2		1.307	0.1305
O60341	Lysine-specific histone demethylase 1A OS=Homo sapiens OX=9606 GN=KDM1A PE=1 SV=2	KDM1A	8	1.539	0.0898	Lysine-specific histone demethylase 1A	KDM1A	6;5;5;2	1.3063	0.1131	Lysine-specific histone demethylase 1A	KDM1A	6	1.37344	0.00571631
Q9Y3L5	Ras-related protein Rap-2c OS=Homo sapiens OX=9606 GN=RAP2C PE=1 SV=1	RAP2C	4	0.946	0.6931	Ras-related protein Rap-2c	RAP2C		1.3063	0.375
P32969	60S ribosomal protein L9 OS=Homo sapiens OX=9606 GN=RPL9 PE=1 SV=1	RPL9	7	1.168	0.2463	60S ribosomal protein L9	RPL9		1.3061	0.0621
P16989	Y-box-binding protein 3 OS=Homo sapiens OX=9606 GN=YBX3 PE=1 SV=4	CSDA; YBX3	6	0.801	0.04455	Y-box-binding protein 3	YBX3	5;5;5;3;3	1.3061	0.0573	Y-box-binding protein 3;Y-box-binding protein 2	YBX3;YBX2	6	0.928539	0.569497
Q8NBJ5	Procollagen galactosyltransferase 1 OS=Homo sapiens OX=9606 GN=COLGALT1 PE=1 SV=1	COLGALT1; GLT25D1	20	1.18	0.01107	Procollagen galactosyltransferase 1	COLGALT1	12;3;2	1.3059	0.005	Procollagen galactosyltransferase 1	COLGALT1	12	1.3565	0.0645214
Q15021						Condensin complex subunit 1	NCAPD2		1.3054	0.1784
Q9Y4E6						WD repeat-containing protein 7	WDR7	3;3;2	1.3053	0.3133	WD repeat-containing protein 7	WDR7	4	1.17579	0.477221
Q8N7H5	RNA polymerase II-associated factor 1 homolog OS=Homo sapiens OX=9606 GN=PAF1 PE=1 SV=2	PAF1	4	1.123	0.6482	RNA polymerase II-associated factor 1 homolog	PAF1	6;5;5;1	1.305	0.0097	RNA polymerase II-associated factor 1 homolog	PAF1	6	1.27181	0.113652
P28347	Transcriptional enhancer factor TEF-1 OS=Homo sapiens OX=9606 GN=TEAD1 PE=1 SV=2	TEAD1	2	0.961	0.6011	Transcriptional enhancer factor TEF-1	TEAD1		1.3047	0.2018
Q96MU7						YTH domain-containing protein 1	YTHDC1		1.3042	0.1331
Q14534	Squalene monooxygenase OS=Homo sapiens OX=9606 GN=SQLE PE=1 SV=3	SQLE	2	0.483	0.2048	Squalene monooxygenase	SQLE		1.304	0.0274
Q9UBK9	Protein UXT OS=Homo sapiens OX=9606 GN=UXT PE=1 SV=1	UXT	1	0.919	0.6622	Protein UXT	UXT		1.3038	0.5012
Q5J8M3	ER membrane protein complex subunit 4 OS=Homo sapiens OX=9606 GN=EMC4 PE=1 SV=2	EMC4	3	1.087	0.1636	ER membrane protein complex subunit 4	EMC4	3;2;2;2;2;2;2;1;1	1.3037	0.2172	ER membrane protein complex subunit 4	EMC4	3	1.26379	0.184573
Q9BXB4	Oxysterol-binding protein-related protein 11 OS=Homo sapiens OX=9606 GN=OSBPL11 PE=1 SV=2	OSBPL11	3	0.954	0.6599	Oxysterol-binding protein-related protein 11	OSBPL11	5;1;1;1	1.3037	0.1204	Oxysterol-binding protein-related protein 11	OSBPL11	5	1.22545	0.435665
Q9GZZ9	Ubiquitin-like modifier-activating enzyme 5 OS=Homo sapiens OX=9606 GN=UBA5 PE=1 SV=1	UBA5	4	0.889	0.3352	Ubiquitin-like modifier-activating enzyme 5	UBA5		1.3035	0.3419
Q9UM22	Mammalian ependymin-related protein 1 OS=Homo sapiens OX=9606 GN=EPDR1 PE=1 SV=2	EPDR1	3	0.805	0.2687	Mammalian ependymin-related protein 1	EPDR1	4;3;2;1	1.3029	0.2827	Mammalian ependymin-related protein 1	EPDR1	4	1.28362	0.143477
P22087	rRNA 2'-O-methyltransferase fibrillarin OS=Homo sapiens OX=9606 GN=FBL PE=1 SV=2	FBL	9	1.128	0.06357	rRNA 2'-O-methyltransferase fibrillarin	FBL	7;4	1.3025	0.0482	rRNA 2-O-methyltransferase fibrillarin	FBL	8	1.20169	0.303205
O95140						Mitofusin-2	MFN2		1.3024	0.5067
P18124	60S ribosomal protein L7 OS=Homo sapiens OX=9606 GN=RPL7 PE=1 SV=1	RPL7	13	1.19	0.2431	60S ribosomal protein L7	RPL7	7;6;2;2	1.3022	0.0983	60S ribosomal protein L7	RPL7	7	1.27208	0.293716
Q8IWW6						Rho GTPase-activating protein 12	ARHGAP12		1.3022	0.3386
O43709	Probable 18S rRNA (guanine-N(7))-methyltransferase OS=Homo sapiens OX=9606 GN=BUD23 PE=1 SV=2	WBSCR22; BUD23	2	1.124	0.4151	Probable 18S rRNA (guanine-N(7))-methyltransferase	BUD23	2;2;2;1;1;1;1;1;0;0	1.3015	0.333	Probable 18S rRNA (guanine-N(7))-methyltransferase	WBSCR22	3	1.32464	0.183086
Q5JVF3						PCI domain-containing protein 2	PCID2		1.3012	0.061
Q9H7D7	WD repeat-containing protein 26 OS=Homo sapiens OX=9606 GN=WDR26 PE=1 SV=3	WDR26	7	0.722	0.342	WD repeat-containing protein 26	WDR26	2;2;1	1.301	0.3606	WD repeat-containing protein 26	WDR26	2	1.05547	0.774962
P05423						DNA-directed RNA polymerase III subunit RPC4	POLR3D		1.3005	0.292
P33897	ATP-binding cassette sub-family D member 1 OS=Homo sapiens OX=9606 GN=ABCD1 PE=1 SV=2	ABCD1	3	0.883	0.5397	ATP-binding cassette sub-family D member 1	ABCD1	2	1.3004	0.1077	ATP-binding cassette sub-family D member 1	ABCD1	2	1.31723	0.337507
Q14156	Protein EFR3 homolog A OS=Homo sapiens OX=9606 GN=EFR3A PE=1 SV=2	EFR3A	9	1.679	0.02505	Protein EFR3 homolog A	EFR3A		1.3001	0.0951
Q92797	Symplekin OS=Homo sapiens OX=9606 GN=SYMPK PE=1 SV=2	SYMPK	5	1.537	0.02416	Symplekin	SYMPK		1.2997	0.0031
Q05519	Serine/arginine-rich splicing factor 11 OS=Homo sapiens OX=9606 GN=SRSF11 PE=1 SV=1	SRSF11	6	1.413	0.2189	Serine/arginine-rich splicing factor 11	SRSF11		1.2995	0.0059
Q53GS9	U4/U6.U5 tri-snRNP-associated protein 2 OS=Homo sapiens OX=9606 GN=USP39 PE=1 SV=2	USP39	11	1.32	0.09066	U4/U6.U5 tri-snRNP-associated protein 2	USP39		1.2993	0.0173
Q15018	BRISC complex subunit Abraxas 2 OS=Homo sapiens OX=9606 GN=ABRAXAS2 PE=1 SV=2	FAM175B; ABRAXAS2	3	1.399	0.0361	BRISC complex subunit Abraxas 2	ABRAXAS2		1.2987	0.2045
Q07020	60S ribosomal protein L18 OS=Homo sapiens OX=9606 GN=RPL18 PE=1 SV=2	RPL18	5	1.153	0.1896	60S ribosomal protein L18	RPL18		1.2987	0.0162
O95297	Myelin protein zero-like protein 1 OS=Homo sapiens OX=9606 GN=MPZL1 PE=1 SV=1	MPZL1	4	1.033	0.5536	Myelin protein zero-like protein 1	MPZL1	2;2;2;1;1	1.2987	0.0309	Myelin protein zero-like protein 1	MPZL1	2	1.12617	0.352744
Q14839	Chromodomain-helicase-DNA-binding protein 4 OS=Homo sapiens OX=9606 GN=CHD4 PE=1 SV=2	CHD4	18	1.101	0.2153	Chromodomain-helicase-DNA-binding protein 4	CHD4		1.2984	0.0001
P51808	Dynein light chain Tctex-type 3 OS=Homo sapiens OX=9606 GN=DYNLT3 PE=1 SV=1	DYNLT3	3	1.12	0.6262	Dynein light chain Tctex-type 3	DYNLT3		1.2981	0.4262
P09234	U1 small nuclear ribonucleoprotein C OS=Homo sapiens OX=9606 GN=SNRPC PE=1 SV=1	SNRPC	2	1.152	0.2376	U1 small nuclear ribonucleoprotein C	SNRPC		1.2976	0.1323
Q8N2F6	Armadillo repeat-containing protein 10 OS=Homo sapiens OX=9606 GN=ARMC10 PE=1 SV=1	ARMC10	4	0.817	0.1481	Armadillo repeat-containing protein 10	ARMC10		1.2973	0.1236
Q00535	Cyclin-dependent-like kinase 5 OS=Homo sapiens OX=9606 GN=CDK5 PE=1 SV=3	CDK5	5	0.995	0.9668	Cyclin-dependent-like kinase 5	CDK5		1.297	0.0873
Q9GZY8	Mitochondrial fission factor OS=Homo sapiens OX=9606 GN=MFF PE=1 SV=1	MFF	5	0.829	0.3343	Mitochondrial fission factor	MFF		1.2964	0.1008
Q2PZI1	Probable C-mannosyltransferase DPY19L1 OS=Homo sapiens OX=9606 GN=DPY19L1 PE=2 SV=1	DPY19L1	2	1.072	0.6038	Probable C-mannosyltransferase DPY19L1	DPY19L1		1.2961	0.2948
P09012	U1 small nuclear ribonucleoprotein A OS=Homo sapiens OX=9606 GN=SNRPA PE=1 SV=3	SNRPA	3	1.076	0.5093	U1 small nuclear ribonucleoprotein A	SNRPA		1.2958	0.0034
O75190	DnaJ homolog subfamily B member 6 OS=Homo sapiens OX=9606 GN=DNAJB6 PE=1 SV=2	DNAJB6	5	0.983	0.9064	DnaJ homolog subfamily B member 6	DNAJB6		1.2956	0.1108
Q02127						Dihydroorotate dehydrogenase (quinone), mitochondrial	DHODH		1.2956	0.2342
O14682						Ectoderm-neural cortex protein 1	ENC1		1.2955	0.3501
P35249	Replication factor C subunit 4 OS=Homo sapiens OX=9606 GN=RFC4 PE=1 SV=2	RFC4	5	1.244	0.05125	Replication factor C subunit 4	RFC4	3;2;2;2;1;1;1	1.2945	0.0482	Replication factor C subunit 4	RFC4	3	1.44182	0.024167
Q8WVV9	Heterogeneous nuclear ribonucleoprotein L-like OS=Homo sapiens OX=9606 GN=HNRNPLL PE=1 SV=1	HNRNPLL; HNRPLL	13	1.063	0.6749	Heterogeneous nuclear ribonucleoprotein L-like	HNRNPLL		1.2945	0.0025
Q63HN8	E3 ubiquitin-protein ligase RNF213 OS=Homo sapiens OX=9606 GN=RNF213 PE=1 SV=3	RNF213	11	1.997	0.08981	E3 ubiquitin-protein ligase RNF213	RNF213		1.2944	0.1225
Q9UL33	Trafficking protein particle complex subunit 2-like protein OS=Homo sapiens OX=9606 GN=TRAPPC2L PE=1 SV=1	TRAPPC2L	2	0.929	0.4577	Trafficking protein particle complex subunit 2-like protein	TRAPPC2L		1.2933	0.3165
Q9HCN8	Stromal cell-derived factor 2-like protein 1 OS=Homo sapiens OX=9606 GN=SDF2L1 PE=1 SV=2	SDF2L1	3	0.783	0.3412	Stromal cell-derived factor 2-like protein 1	SDF2L1		1.2929	0.1389
O14979	Heterogeneous nuclear ribonucleoprotein D-like OS=Homo sapiens OX=9606 GN=HNRNPDL PE=1 SV=3	HNRNPDL; HNRPDL	10	1.216	0.003039	Heterogeneous nuclear ribonucleoprotein D-like	HNRNPDL		1.2927	0.0231
P55081	Microfibrillar-associated protein 1 OS=Homo sapiens OX=9606 GN=MFAP1 PE=1 SV=2	MFAP1	2	1.729	0.1179	Microfibrillar-associated protein 1	MFAP1		1.2925	0.2399
O95071						E3 ubiquitin-protein ligase UBR5	UBR5		1.2924	0.0105
Q8N4V1	ER membrane protein complex subunit 5 OS=Homo sapiens OX=9606 GN=MMGT1 PE=1 SV=1	MMGT1	1	1.148	0.3648	ER membrane protein complex subunit 5	MMGT1		1.2916	0.1603
Q9NUI1	Peroxisomal 2,4-dienoyl-CoA reductase [(3E)-enoyl-CoA-producing] OS=Homo sapiens OX=9606 GN=DECR2 PE=1 SV=1	DECR2	4	1.031	0.8232	Peroxisomal 2,4-dienoyl-CoA reductase [(3E)-enoyl-CoA-producing]	DECR2		1.2908	0.0813
Q07021	Complement component 1 Q subcomponent-binding protein, mitochondrial OS=Homo sapiens OX=9606 GN=C1QBP PE=1 SV=1	C1QBP	5	1.064	0.763	Complement component 1 Q subcomponent-binding protein, mitochondrial	C1QBP	3;1;1	1.2906	0.2202	Complement component 1 Q subcomponent-binding protein, mitochondrial	C1QBP	3	1.28079	0.4089
Q9UH99	SUN domain-containing protein 2 OS=Homo sapiens OX=9606 GN=SUN2 PE=1 SV=3	SUN2	17	1.537	0.01192	SUN domain-containing protein 2	SUN2	12;12;11;4	1.2905	0.0028	SUN domain-containing protein 2	SUN2	12	1.32644	0.00608203
Q9ULH1	Arf-GAP with SH3 domain, ANK repeat and PH domain-containing protein 1 OS=Homo sapiens OX=9606 GN=ASAP1 PE=1 SV=4	ASAP1	5	0.616	0.253	Arf-GAP with SH3 domain, ANK repeat and PH domain-containing protein 1	ASAP1		1.2904	0.0964
Q969G5	Caveolae-associated protein 3 OS=Homo sapiens OX=9606 GN=CAVIN3 PE=1 SV=3	PRKCDBP; CAVIN3	8	0.958	0.5795	Caveolae-associated protein 3	CAVIN3		1.2898	0.2783
Q12769	Nuclear pore complex protein Nup160 OS=Homo sapiens OX=9606 GN=NUP160 PE=1 SV=3	NUP160	7	0.867	0.7362	Nuclear pore complex protein Nup160	NUP160		1.2898	0.0568
Q9Y5P4	Ceramide transfer protein OS=Homo sapiens OX=9606 GN=CERT1 PE=1 SV=1	COL4A3BP	5	1.22	0.6229	Ceramide transfer protein	CERT1		1.2893	0.0176
Q15061	WD repeat-containing protein 43 OS=Homo sapiens OX=9606 GN=WDR43 PE=1 SV=3	WDR43	4	1.184	0.3359	WD repeat-containing protein 43	WDR43		1.2892	0.6418
Q9NZQ7						Programmed cell death 1 ligand 1	CD274		1.288	0.5048
P23368	NAD-dependent malic enzyme, mitochondrial OS=Homo sapiens OX=9606 GN=ME2 PE=1 SV=1	ME2	6	0.804	0.3342	NAD-dependent malic enzyme, mitochondrial	ME2		1.2871	0.2249
Q8TCD5	5'(3')-deoxyribonucleotidase, cytosolic type OS=Homo sapiens OX=9606 GN=NT5C PE=1 SV=2	NT5C	4	1.052	0.7807	5'(3')-deoxyribonucleotidase, cytosolic type	NT5C	6;5;4;3	1.2864	0.0154	5(3)-deoxyribonucleotidase, cytosolic type	NT5C	6	1.11504	0.462526
Q8WW59						SPRY domain-containing protein 4	SPRYD4		1.2863	0.1683
Q92783	Signal transducing adapter molecule 1 OS=Homo sapiens OX=9606 GN=STAM PE=1 SV=3	STAM	6	0.871	0.3605	Signal transducing adapter molecule 1	STAM	4;4;1;1	1.286	0.3724	Signal transducing adapter molecule 1	STAM	4	0.922232	0.820152
Q13951	Core-binding factor subunit beta OS=Homo sapiens OX=9606 GN=CBFB PE=1 SV=2	CBFB	4	1.296	0.2414	Core-binding factor subunit beta	CBFB	3;2;2;1;1;1;1	1.2858	0.0412	Core-binding factor subunit beta	CBFB	3	1.2971	0.0846576
Q8IX12	Cell division cycle and apoptosis regulator protein 1 OS=Homo sapiens OX=9606 GN=CCAR1 PE=1 SV=2	CCAR1	9	1.096	0.6515	Cell division cycle and apoptosis regulator protein 1	CCAR1		1.2857	0.0393
P49458	Signal recognition particle 9 kDa protein OS=Homo sapiens OX=9606 GN=SRP9 PE=1 SV=2	SRP9; SRP9P1	2	0.977	0.844	Signal recognition particle 9 kDa protein	SRP9	2;1;1;1;1	1.2857	0.0095	Signal recognition particle 9 kDa protein	SRP9;DKFZp564M2223	2	1.18863	0.231832
P02458	Collagen alpha-1(II) chain OS=Homo sapiens OX=9606 GN=COL2A1 PE=1 SV=3	COL2A1	6	1.001	0.9946	Collagen alpha-1(II) chain	COL2A1	8;8;3	1.2852	0.3336	Collagen alpha-1(II) chain;Collagen alpha-1(II) chain;Chondrocalcin	COL2A1	8	0.850257	0.492458
Q6GQQ9	OTU domain-containing protein 7B OS=Homo sapiens OX=9606 GN=OTUD7B PE=1 SV=1	OTUD7B	3	1.012	0.9741	OTU domain-containing protein 7B	OTUD7B		1.2847	0.4685
P08621	U1 small nuclear ribonucleoprotein 70 kDa OS=Homo sapiens OX=9606 GN=SNRNP70 PE=1 SV=2	SNRNP70	6	1.245	0.1871	U1 small nuclear ribonucleoprotein 70 kDa	SNRNP70	3;3;3;2	1.2845	0.0113	U1 small nuclear ribonucleoprotein 70 kDa	SNRNP70	3	1.36315	0.104917
Q8WVC0	RNA polymerase-associated protein LEO1 OS=Homo sapiens OX=9606 GN=LEO1 PE=1 SV=1	LEO1	1	1.12	0.4566	RNA polymerase-associated protein LEO1	LEO1		1.2845	0.4885
Q9BQ70	Transcription factor 25 OS=Homo sapiens OX=9606 GN=TCF25 PE=1 SV=1	TCF25	3	0.875	0.7401	Transcription factor 25	TCF25		1.2838	0.2302
Q7Z6B7						SLIT-ROBO Rho GTPase-activating protein 1	SRGAP1	3;3;2	1.2838	0.1765	SLIT-ROBO Rho GTPase-activating protein 1	SRGAP1	3	1.22821	0.037525
Q8IXI1	Mitochondrial Rho GTPase 2 OS=Homo sapiens OX=9606 GN=RHOT2 PE=1 SV=2	RHOT2	11	1.605	0.06388	Mitochondrial Rho GTPase 2	RHOT2	10;7;6;3;2;1;1;1	1.2834	0.0034	Mitochondrial Rho GTPase 2	RHOT2	10	1.20628	0.0852458
Q9UKA4						A-kinase anchor protein 11	AKAP11		1.2834	0.312
Q15582	Transforming growth factor-beta-induced protein ig-h3 OS=Homo sapiens OX=9606 GN=TGFBI PE=1 SV=1	TGFBI	20	1.195	0.01829	Transforming growth factor-beta-induced protein ig-h3	TGFBI	12;9;5;4;1;1;1;1	1.2832	0.0011	Transforming growth factor-beta-induced protein ig-h3	TGFBI	12	1.32774	0.0509894
Q99622	Protein C10 OS=Homo sapiens OX=9606 GN=C12orf57 PE=1 SV=1	C12orf57	3	1.214	0.6172	Protein C10	C12orf57	3;2;2;1	1.283	0.0581	Protein C10	C12orf57	3	0.924523	0.683888
P46926	Glucosamine-6-phosphate isomerase 1 OS=Homo sapiens OX=9606 GN=GNPDA1 PE=1 SV=1	GNPDA1	5	1.019	0.8686	Glucosamine-6-phosphate isomerase 1	GNPDA1		1.2828	0.0881
Q99707	Methionine synthase OS=Homo sapiens OX=9606 GN=MTR PE=1 SV=2	MTR	7	2.128	0.1861	Methionine synthase	MTR	3;3;2;1;1	1.2823	0.0068	Methionine synthase	MTR	4	1.17321	0.225759
P16949	Stathmin OS=Homo sapiens OX=9606 GN=STMN1 PE=1 SV=3	STMN1	4	1.235	0.007604	Stathmin	STMN1		1.282	0.0663
Q96BM9	ADP-ribosylation factor-like protein 8A OS=Homo sapiens OX=9606 GN=ARL8A PE=1 SV=1	ARL8A	8	1.019	0.7434	ADP-ribosylation factor-like protein 8A	ARL8A		1.2817	0.1551
Q96EK6	Glucosamine 6-phosphate N-acetyltransferase OS=Homo sapiens OX=9606 GN=GNPNAT1 PE=1 SV=1	GNPNAT1	4	0.674	0.01187	Glucosamine 6-phosphate N-acetyltransferase	GNPNAT1		1.2813	0.2002
P09661	U2 small nuclear ribonucleoprotein A' OS=Homo sapiens OX=9606 GN=SNRPA1 PE=1 SV=2	SNRPA1	9	1.205	0.06011	U2 small nuclear ribonucleoprotein A'	SNRPA1	7;4;4;3	1.2805	0.0044	U2 small nuclear ribonucleoprotein A	SNRPA1	7	1.12844	0.0935881
Q8WV41	Sorting nexin-33 OS=Homo sapiens OX=9606 GN=SNX33 PE=1 SV=1	SNX33	2	1.201	0.009785	Sorting nexin-33	SNX33		1.2803	0.4753
Q9H8T0	AKT-interacting protein OS=Homo sapiens OX=9606 GN=AKTIP PE=1 SV=1	AKTIP	3	0.823	0.2879	AKT-interacting protein	AKTIP		1.28	0.1695
Q9NYS7						WD repeat and SOCS box-containing protein 2	WSB2		1.2796	0.4201
Q15173	Serine/threonine-protein phosphatase 2A 56 kDa regulatory subunit beta isoform OS=Homo sapiens OX=9606 GN=PPP2R5B PE=1 SV=1	PPP2R5B	4	1.086	0.06927	Serine/threonine-protein phosphatase 2A 56 kDa regulatory subunit beta isoform	PPP2R5B	3;3;2;1	1.2773	0.1472	Serine/threonine-protein phosphatase 2A 56 kDa regulatory subunit beta isoform	PPP2R5B	3	1.81073	0.0331339
Q6ZW31	Rho GTPase-activating protein SYDE1 OS=Homo sapiens OX=9606 GN=SYDE1 PE=1 SV=1	SYDE1	2	1.198	0.3107	Rho GTPase-activating protein SYDE1	SYDE1	7;6;5;1;1	1.277	0.3823	Rho GTPase-activating protein SYDE1	SYDE1	7	1.27167	0.113387
Q8WUD1	Ras-related protein Rab-2B OS=Homo sapiens OX=9606 GN=RAB2B PE=1 SV=1	RAB2B	10	1.045	0.6025	Ras-related protein Rab-2B	RAB2B	9;8;5	1.277	0.0373	Ras-related protein Rab-2B	RAB2B	9	0.911886	0.559779
Q12849	G-rich sequence factor 1 OS=Homo sapiens OX=9606 GN=GRSF1 PE=1 SV=3	GRSF1	9	0.993	0.941	G-rich sequence factor 1	GRSF1		1.2768	0.0153
Q9H078	Caseinolytic peptidase B protein homolog OS=Homo sapiens OX=9606 GN=CLPB PE=1 SV=1	CLPB	4	0.681	0.09218	Caseinolytic peptidase B protein homolog	CLPB		1.2767	0.0857
Q6YHK3	CD109 antigen OS=Homo sapiens OX=9606 GN=CD109 PE=1 SV=2	CD109	5	0.982	0.9215	CD109 antigen	CD109	5;5;5;3	1.2766	0.0253	CD109 antigen	CD109	5	1.19363	0.201575
Q9UBY9	Heat shock protein beta-7 OS=Homo sapiens OX=9606 GN=HSPB7 PE=1 SV=1	HSPB7	4	1.282	0.01101	Heat shock protein beta-7	HSPB7		1.2765	0.0382
Q9P0L0	Vesicle-associated membrane protein-associated protein A OS=Homo sapiens OX=9606 GN=VAPA PE=1 SV=3	VAPA	5	1.008	0.8955	Vesicle-associated membrane protein-associated protein A	VAPA	3;3;1	1.2762	0.0719	Vesicle-associated membrane protein-associated protein A	VAPA	3	1.08812	0.465714
Q9BTE7						DCN1-like protein 5	DCUN1D5		1.2761	0.0638
P28062						Proteasome subunit beta type-8	PSMB8		1.2758	0.4046
Q9Y570	Protein phosphatase methylesterase 1 OS=Homo sapiens OX=9606 GN=PPME1 PE=1 SV=3	PPME1	7	1.138	0.09743	Protein phosphatase methylesterase 1	PPME1	5	1.2757	0.0734	Protein phosphatase methylesterase 1	PPME1	6	1.16878	0.319277
Q9BWF3	RNA-binding protein 4 OS=Homo sapiens OX=9606 GN=RBM4 PE=1 SV=1	RBM4	9	1.377	0.00374	RNA-binding protein 4	RBM4	6;5;4;4;4;4;4;4;4;4	1.2752	0.0947	RNA-binding protein 4	RBM4;RBM4B	6	1.2148	0.393262
O15063						Granule associated Rac and RHOG effector protein 1	GARRE1		1.2751	0.1516
Q9Y4W2	Ribosomal biogenesis protein LAS1L OS=Homo sapiens OX=9606 GN=LAS1L PE=1 SV=2	LAS1L	8	1.218	0.189	Ribosomal biogenesis protein LAS1L	LAS1L	7;7;5;5	1.2746	0.22	Ribosomal biogenesis protein LAS1L	LAS1L	8	1.01142	0.912742
Q9Y256	CAAX prenyl protease 2 OS=Homo sapiens OX=9606 GN=RCE1 PE=1 SV=1	RCE1; C11orf80	2	0.908	0.6559	CAAX prenyl protease 2	RCE1		1.2735	0.3132
P80217						Interferon-induced 35 kDa protein	IFI35		1.2734	0.039
O15484	Calpain-5 OS=Homo sapiens OX=9606 GN=CAPN5 PE=1 SV=2	CAPN5	5	2.103	0.2507	Calpain-5	CAPN5		1.2731	0.0943
O14880	Microsomal glutathione S-transferase 3 OS=Homo sapiens OX=9606 GN=MGST3 PE=1 SV=1	MGST3	3	1.133	0.08137	Microsomal glutathione S-transferase 3	MGST3	3;3;2	1.2727	0.1017	Microsomal glutathione S-transferase 3	MGST3	3	1.23599	0.198024
Q9NRY4	Rho GTPase-activating protein 35 OS=Homo sapiens OX=9606 GN=ARHGAP35 PE=1 SV=3	ARHGAP35	16	1.41	0.3015	Rho GTPase-activating protein 35	ARHGAP35	5	1.2724	0.0326	Rho GTPase-activating protein 35	ARHGAP35	7	0.907964	0.504739
Q99973	Telomerase protein component 1 OS=Homo sapiens OX=9606 GN=TEP1 PE=1 SV=2	TEP1	4	0.81	0.5027	Telomerase protein component 1	TEP1	5;5;4;4;2;1;1;1	1.2722	0.0085	Telomerase protein component 1	TEP1	5	1.36069	0.16524
P62834	Ras-related protein Rap-1A OS=Homo sapiens OX=9606 GN=RAP1A PE=1 SV=1	RAP1A	7	1.474	0.1786	Ras-related protein Rap-1A	RAP1A		1.2717	0.2468
P23921	Ribonucleoside-diphosphate reductase large subunit OS=Homo sapiens OX=9606 GN=RRM1 PE=1 SV=1	RRM1	12	1.192	0.2467	Ribonucleoside-diphosphate reductase large subunit	RRM1	10;6;2;2	1.2717	0.0005	Ribonucleoside-diphosphate reductase large subunit	RRM1	10	1.20049	0.174168
Q13895	Bystin OS=Homo sapiens OX=9606 GN=BYSL PE=1 SV=3	BYSL	7	1.008	0.8907	Bystin	BYSL	3;1;1	1.2714	0.2815	Bystin	BYSL	3	1.29435	0.270097
P84103	Serine/arginine-rich splicing factor 3 OS=Homo sapiens OX=9606 GN=SRSF3 PE=1 SV=1	SRSF3	3	1.31	0.03272	Serine/arginine-rich splicing factor 3	SRSF3		1.2713	0.0626
O43155	Leucine-rich repeat transmembrane protein FLRT2 OS=Homo sapiens OX=9606 GN=FLRT2 PE=1 SV=1	FLRT2	10	1.308	0.3672	Leucine-rich repeat transmembrane protein FLRT2	FLRT2	6	1.271	0.0625	Leucine-rich repeat transmembrane protein FLRT2	FLRT2	6	1.00695	0.940596
P29279	CCN family member 2 OS=Homo sapiens OX=9606 GN=CCN2 PE=1 SV=2	CTGF	12	1.103	0.1498	CCN family member 2	CCN2	9;6	1.2707	0.0243	Connective tissue growth factor	CTGF	9	1.364	0.0713089
P40855	Peroxisomal biogenesis factor 19 OS=Homo sapiens OX=9606 GN=PEX19 PE=1 SV=1	PEX19	2	0.915	0.4269	Peroxisomal biogenesis factor 19	PEX19		1.2707	0.2758
Q9H6B4	CXADR-like membrane protein OS=Homo sapiens OX=9606 GN=CLMP PE=1 SV=1	CLMP	7	1.168	0.2194	CXADR-like membrane protein	CLMP	3	1.2704	0.0252	CXADR-like membrane protein	CLMP	4	1.5488	0.102238
Q9H270	Vacuolar protein sorting-associated protein 11 homolog OS=Homo sapiens OX=9606 GN=VPS11 PE=1 SV=1	VPS11	7	0.895	0.4974	Vacuolar protein sorting-associated protein 11 homolog	VPS11		1.2704	0.0994
Q86UY6	N-alpha-acetyltransferase 40 OS=Homo sapiens OX=9606 GN=NAA40 PE=1 SV=1	NAA40	2	0.789	0.3671	N-alpha-acetyltransferase 40	NAA40		1.2703	0.0791
P35125						Ubiquitin carboxyl-terminal hydrolase 6;Ubiquitin carboxyl-terminal hydrolase 32	USP6;USP32		1.2702	0.5758
Q9Y5U2						Protein TSSC4	TSSC4		1.2699	0.2134
Q9NTJ3	Structural maintenance of chromosomes protein 4 OS=Homo sapiens OX=9606 GN=SMC4 PE=1 SV=2	SMC4	10	1.527	0.06669	Structural maintenance of chromosomes protein 4	SMC4		1.2696	0.1179
P78406	mRNA export factor OS=Homo sapiens OX=9606 GN=RAE1 PE=1 SV=1	RAE1	5	1.478	0.2376	mRNA export factor	RAE1		1.2695	0.1387
Q96DB5	Regulator of microtubule dynamics protein 1 OS=Homo sapiens OX=9606 GN=RMDN1 PE=1 SV=1	FAM82B; RMDN1	8	0.878	0.3035	Regulator of microtubule dynamics protein 1	RMDN1	7;5;4;4;4;4;3;1;1;1;1	1.2691	0.1799	Regulator of microtubule dynamics protein 1	RMDN1	7	1.11488	0.452589
Q8IY67	Ribonucleoprotein PTB-binding 1 OS=Homo sapiens OX=9606 GN=RAVER1 PE=1 SV=1	RAVER1	9	1.479	0.02221	Ribonucleoprotein PTB-binding 1	RAVER1		1.2687	0.0236
Q96FX7						tRNA (adenine(58)-N(1))-methyltransferase catalytic subunit TRMT61A	TRMT61A		1.2686	0.3218
Q8N8S7	Protein enabled homolog OS=Homo sapiens OX=9606 GN=ENAH PE=1 SV=2	ENAH	13	1.22	0.002919	Protein enabled homolog	ENAH		1.2685	0.2922
Q8IWA0	WD repeat-containing protein 75 OS=Homo sapiens OX=9606 GN=WDR75 PE=1 SV=1	WDR75	6	1.011	0.9454	WD repeat-containing protein 75	WDR75	3	1.2685	0.0263	WD repeat-containing protein 75	WDR75	3	1.08806	0.570796
Q9NUQ9	CYFIP-related Rac1 interactor B OS=Homo sapiens OX=9606 GN=CYRIB PE=1 SV=1	FAM49B	5	1.07	0.4004	CYFIP-related Rac1 interactor B	CYRIB	2;1;1;1;1;1;1;1;1;1	1.2682	0.0741	Protein FAM49B	FAM49B	2	1.00928	0.918882
Q8N201						Integrator complex subunit 1	INTS1	4;1	1.2681	0.0042	Integrator complex subunit 1	INTS1	5	1.11118	0.697819
O94776	Metastasis-associated protein MTA2 OS=Homo sapiens OX=9606 GN=MTA2 PE=1 SV=1	MTA2	16	1.155	0.1147	Metastasis-associated protein MTA2	MTA2	8;5	1.2676	0.0005	Metastasis-associated protein MTA2	MTA2	8	1.51144	0.00968873
Q06587						E3 ubiquitin-protein ligase RING1	RING1		1.2675	0.1327
Q9HAV4	Exportin-5 OS=Homo sapiens OX=9606 GN=XPO5 PE=1 SV=1	XPO5	3	1.232	0.3175	Exportin-5	XPO5	6;1;1	1.2671	0.0537	Exportin-5	XPO5	6	1.25669	0.0759604
P31946	14-3-3 protein beta/alpha OS=Homo sapiens OX=9606 GN=YWHAB PE=1 SV=3	YWHAB	11	0.94	0.2402	14-3-3 protein beta/alpha	YWHAB	7;7	1.267	0.0061	14-3-3 protein beta/alpha;14-3-3 protein beta/alpha, N-terminally processed	YWHAB	7	1.06456	0.55003
O43402	ER membrane protein complex subunit 8 OS=Homo sapiens OX=9606 GN=EMC8 PE=1 SV=1	EMC8	4	1.031	0.7424	ER membrane protein complex subunit 8	EMC8		1.2668	0.186
Q9BQ69	ADP-ribose glycohydrolase MACROD1 OS=Homo sapiens OX=9606 GN=MACROD1 PE=1 SV=2	MACROD1	4	1.378	0.2167	ADP-ribose glycohydrolase MACROD1	MACROD1		1.2667	0.0973
P16403	Histone H1.2 OS=Homo sapiens OX=9606 GN=H1-2 PE=1 SV=2	HIST1H1C	3	1.585	0.00321	Histone H1.2	H1-2		1.2664	0.1516
P42696	RNA-binding protein 34 OS=Homo sapiens OX=9606 GN=RBM34 PE=1 SV=2	RBM34	3	1.476	0.1565	RNA-binding protein 34	RBM34		1.266	0.1684
O00264	Membrane-associated progesterone receptor component 1 OS=Homo sapiens OX=9606 GN=PGRMC1 PE=1 SV=3	PGRMC1	10	1.222	0.01539	Membrane-associated progesterone receptor component 1	PGRMC1	6;4	1.266	0.048	Membrane-associated progesterone receptor component 1	PGRMC1	6	1.16477	0.103832
Q15056	Eukaryotic translation initiation factor 4H OS=Homo sapiens OX=9606 GN=EIF4H PE=1 SV=5	EIF4H	4	1.12	0.1877	Eukaryotic translation initiation factor 4H	EIF4H	2;2	1.2657	0.0168	Eukaryotic translation initiation factor 4H	EIF4H	2	0.95196	0.583094
Q96MW5						Conserved oligomeric Golgi complex subunit 8	COG8		1.2657	0.4763
P62888	60S ribosomal protein L30 OS=Homo sapiens OX=9606 GN=RPL30 PE=1 SV=2	RPL30	5	0.948	0.7054	60S ribosomal protein L30	RPL30		1.2656	0.2954
Q7L2E3	ATP-dependent RNA helicase DHX30 OS=Homo sapiens OX=9606 GN=DHX30 PE=1 SV=1	DHX30	13	1.012	0.8183	ATP-dependent RNA helicase DHX30	DHX30		1.2655	0.0079
Q8IVD9	NudC domain-containing protein 3 OS=Homo sapiens OX=9606 GN=NUDCD3 PE=1 SV=3	NUDCD3	3	1.185		NudC domain-containing protein 3	NUDCD3		1.2653	0.2293
P55957	BH3-interacting domain death agonist OS=Homo sapiens OX=9606 GN=BID PE=1 SV=1	BID	2	0.849	0.4973	BH3-interacting domain death agonist	BID	2;2;2	1.2652	0.1497	BH3-interacting domain death agonist;BH3-interacting domain death agonist p15;BH3-interacting domain death agonist p13;BH3-interacting domain death agonist p11	BID	2	1.16814	0.259624
Q9UBH6	Xenotropic and polytropic retrovirus receptor 1 OS=Homo sapiens OX=9606 GN=XPR1 PE=1 SV=1	XPR1	2	1.176	0.1936	Xenotropic and polytropic retrovirus receptor 1	XPR1		1.265	0.2708
Q96AE7						Tetratricopeptide repeat protein 17	TTC17		1.2647	0.3624
Q9H490	Phosphatidylinositol glycan anchor biosynthesis class U protein OS=Homo sapiens OX=9606 GN=PIGU PE=1 SV=3	PIGU	2	1.061	0.8617	Phosphatidylinositol glycan anchor biosynthesis class U protein	PIGU	2;2	1.2641	0.2959	Phosphatidylinositol glycan anchor biosynthesis class U protein	PIGU	2	1.04572	0.874104
P22234	Multifunctional protein ADE2 OS=Homo sapiens OX=9606 GN=PAICS PE=1 SV=3	PAICS	13	0.97	0.8272	Multifunctional protein ADE2	PAICS	10;9;9;8	1.264	0.028	Multifunctional protein ADE2;Phosphoribosylaminoimidazole-succinocarboxamide synthase;Phosphoribosylaminoimidazole carboxylase	PAICS	10	1.23618	0.192545
P78347	General transcription factor II-I OS=Homo sapiens OX=9606 GN=GTF2I PE=1 SV=2	GTF2I	11	1.023	0.918	General transcription factor II-I	GTF2I		1.2639	0.1621
P04439	HLA class I histocompatibility antigen, A alpha chain OS=Homo sapiens OX=9606 GN=HLA-A PE=1 SV=2	HLA-A	8	1.107	0.2965	HLA class I histocompatibility antigen, A alpha chain	HLA-A		1.2637	0.0791
P61009	Signal peptidase complex subunit 3 OS=Homo sapiens OX=9606 GN=SPCS3 PE=1 SV=1	SPCS3	3	0.91	0.4402	Signal peptidase complex subunit 3	SPCS3	2	1.2636	0.1703	Signal peptidase complex subunit 3	SPCS3	2	1.06059	0.625835
Q96S44	EKC/KEOPS complex subunit TP53RK OS=Homo sapiens OX=9606 GN=TP53RK PE=1 SV=2	TP53RK	2	1.43	0.04352	EKC/KEOPS complex subunit TP53RK	TP53RK		1.2635	0.0182
Q9H6R6						Palmitoyltransferase ZDHHC6	ZDHHC6		1.2635	0.2145
P11387	DNA topoisomerase 1 OS=Homo sapiens OX=9606 GN=TOP1 PE=1 SV=2	TOP1	15	1.045	0.6862	DNA topoisomerase 1	TOP1	8	1.2634	0.0182	DNA topoisomerase 1	TOP1	8	1.10567	0.280715
Q8IY81	pre-rRNA 2'-O-ribose RNA methyltransferase FTSJ3 OS=Homo sapiens OX=9606 GN=FTSJ3 PE=1 SV=2	FTSJ3	13	1.187	0.4188	pre-rRNA 2'-O-ribose RNA methyltransferase FTSJ3	FTSJ3	8;2;1	1.2632	0.0084	pre-rRNA processing protein FTSJ3	FTSJ3	8	1.22987	0.0631012
Q14258	E3 ubiquitin/ISG15 ligase TRIM25 OS=Homo sapiens OX=9606 GN=TRIM25 PE=1 SV=2	TRIM25	16	1.166	0.01373	E3 ubiquitin/ISG15 ligase TRIM25	TRIM25	10;9	1.2632	0.0003	E3 ubiquitin/ISG15 ligase TRIM25	TRIM25	11	1.31438	0.0221963
Q9UDY4	DnaJ homolog subfamily B member 4 OS=Homo sapiens OX=9606 GN=DNAJB4 PE=1 SV=1	DNAJB4	12	1.221	0.0066	DnaJ homolog subfamily B member 4	DNAJB4	9;5	1.2631	0.0306	DnaJ homolog subfamily B member 4	DNAJB4	9	1.32086	0.0582359
Q96SB3	Neurabin-2 OS=Homo sapiens OX=9606 GN=PPP1R9B PE=1 SV=3		9	0.783	0.2561	Neurabin-2	PPP1R9B	7;1;1;1;1	1.2631	0.0753	Neurabin-2	PPP1R9B	7	0.926713	0.521159
Q92878	DNA repair protein RAD50 OS=Homo sapiens OX=9606 GN=RAD50 PE=1 SV=1	RAD50	18	1.145	0.1397	DNA repair protein RAD50	RAD50		1.2624	0.0127
Q15334	Lethal(2) giant larvae protein homolog 1 OS=Homo sapiens OX=9606 GN=LLGL1 PE=1 SV=3	LLGL1	6	1.222	0.5992	Lethal(2) giant larvae protein homolog 1	LLGL1		1.2621	0.0805
Q14571						Inositol 1,4,5-trisphosphate receptor type 2	ITPR2		1.2615	0.2588
O43414	ERI1 exoribonuclease 3 OS=Homo sapiens OX=9606 GN=ERI3 PE=1 SV=2	ERI3	4	0.95	0.7098	ERI1 exoribonuclease 3	ERI3		1.2611	0.2651
Q86VR2	Reticulophagy regulator 3 OS=Homo sapiens OX=9606 GN=RETREG3 PE=1 SV=1	FAM134C; RETREG3	3	0.848	0.5702	Reticulophagy regulator 3	RETREG3		1.2609	0.0291
Q9NVP1	ATP-dependent RNA helicase DDX18 OS=Homo sapiens OX=9606 GN=DDX18 PE=1 SV=2	DDX18	11	1.5	0.03136	ATP-dependent RNA helicase DDX18	DDX18	10;4	1.2608	0.0339	ATP-dependent RNA helicase DDX18	DDX18	10	1.17993	0.0759343
O95319						CUGBP Elav-like family member 2	CELF2		1.2608	0.3884
O00541	Pescadillo homolog OS=Homo sapiens OX=9606 GN=PES1 PE=1 SV=1	PES1	6	1.117	0.7012	Pescadillo homolog	PES1		1.2605	0.0527
Q9Y4P3	Transducin beta-like protein 2 OS=Homo sapiens OX=9606 GN=TBL2 PE=1 SV=1	TBL2	15	1.171	0.1258	Transducin beta-like protein 2	TBL2		1.26	0.0176
Q8WVX3	Uncharacterized protein C4orf3 OS=Homo sapiens OX=9606 GN=C4orf3 PE=1 SV=2	C4orf3	1	1.13	0.5056	Uncharacterized protein C4orf3	C4orf3		1.2599	0.3229
Q15047						Histone-lysine N-methyltransferase SETDB1	SETDB1		1.2596	0.4762
Q15172						Serine/threonine-protein phosphatase 2A 56 kDa regulatory subunit alpha isoform	PPP2R5A	2;2	1.2593	0.0665	Serine/threonine-protein phosphatase 2A 56 kDa regulatory subunit alpha isoform	PPP2R5A	2	0.992949	0.967231
Q03252	Lamin-B2 OS=Homo sapiens OX=9606 GN=LMNB2 PE=1 SV=4	LMNB2	22	1.133	0.07978	Lamin-B2	LMNB2	9	1.259	0.0137	Lamin-B2	LMNB2	9	1.25117	0.0364186
Q7L5N1	COP9 signalosome complex subunit 6 OS=Homo sapiens OX=9606 GN=COPS6 PE=1 SV=1	COPS6	6	1.089	0.4723	COP9 signalosome complex subunit 6	COPS6	3;3;1	1.2589	0.1397	COP9 signalosome complex subunit 6	COPS6	4	0.981846	0.87445
Q96RD7						Pannexin-1	PANX1		1.2584	0.0962
Q9H8H0	Nucleolar protein 11 OS=Homo sapiens OX=9606 GN=NOL11 PE=1 SV=1	NOL11	3	1.264	0.428	Nucleolar protein 11	NOL11	6;3;3;3	1.2577	0.0345	Nucleolar protein 11	NOL11	6	0.954664	0.894838
Q9UFN0	Protein NipSnap homolog 3A OS=Homo sapiens OX=9606 GN=NIPSNAP3A PE=1 SV=2	NIPSNAP3A	6	0.955	0.6999	Protein NipSnap homolog 3A	NIPSNAP3A	4;1	1.2573	0.2649	Protein NipSnap homolog 3A	NIPSNAP3A	5	1.17173	0.446133
P42285	Exosome RNA helicase MTR4 OS=Homo sapiens OX=9606 GN=MTREX PE=1 SV=3	SKIV2L2	9	1.273	0.009888	Exosome RNA helicase MTR4	MTREX	8;1	1.257	0.0006	Superkiller viralicidic activity 2-like 2	SKIV2L2	8	1.37442	0.0169294
Q8IWA5	Choline transporter-like protein 2 OS=Homo sapiens OX=9606 GN=SLC44A2 PE=1 SV=3	SLC44A2	4	0.99	0.9599	Choline transporter-like protein 2	SLC44A2	6;6;6;4;4;1;1	1.2569	0.1236	Choline transporter-like protein 2	SLC44A2	6	1.20478	0.264691
P05166						Propionyl-CoA carboxylase beta chain, mitochondrial	PCCB		1.2564	0.1611
Q9H6V9	Lipid droplet-associated hydrolase OS=Homo sapiens OX=9606 GN=LDAH PE=1 SV=1	C2orf43; LDAH	2	1.296		Lipid droplet-associated hydrolase	LDAH	4;3;3;3;2;2;2;2;2;2;1	1.2555	0.1041	UPF0554 protein C2orf43	C2orf43;LDAH	4	1.1393	0.377914
P62266	40S ribosomal protein S23 OS=Homo sapiens OX=9606 GN=RPS23 PE=1 SV=3	RPS23	4	0.834	0.5943	40S ribosomal protein S23	RPS23		1.2553	0.26
Q04323	UBX domain-containing protein 1 OS=Homo sapiens OX=9606 GN=UBXN1 PE=1 SV=2	UBXN1	5	0.969	0.7967	UBX domain-containing protein 1	UBXN1		1.2549	0.0045
P53701	Holocytochrome c-type synthase OS=Homo sapiens OX=9606 GN=HCCS PE=1 SV=1	HCCS	5	0.469	0.01033	Holocytochrome c-type synthase	HCCS		1.2549	0.4468
Q8N0U8	Vitamin K epoxide reductase complex subunit 1-like protein 1 OS=Homo sapiens OX=9606 GN=VKORC1L1 PE=1 SV=2	VKORC1L1	2	0.923	0.4832	Vitamin K epoxide reductase complex subunit 1-like protein 1	VKORC1L1		1.2542	0.144
Q96BY6	Dedicator of cytokinesis protein 10 OS=Homo sapiens OX=9606 GN=DOCK10 PE=1 SV=3	DOCK10	8	1.415	0.0698	Dedicator of cytokinesis protein 10	DOCK10		1.2541	0.1495
Q7Z4Q2	HEAT repeat-containing protein 3 OS=Homo sapiens OX=9606 GN=HEATR3 PE=1 SV=2	HEATR3	1	1.143	0.1331	HEAT repeat-containing protein 3	HEATR3		1.2539	0.1408
Q96PU5	E3 ubiquitin-protein ligase NEDD4-like OS=Homo sapiens OX=9606 GN=NEDD4L PE=1 SV=2	NEDD4L	1	1.157		E3 ubiquitin-protein ligase NEDD4-like	NEDD4L		1.2532	0.0308
Q9BX95	Sphingosine-1-phosphate phosphatase 1 OS=Homo sapiens OX=9606 GN=SGPP1 PE=1 SV=2	SGPP1	3	0.967	0.9013	Sphingosine-1-phosphate phosphatase 1	SGPP1		1.2531	0.0653
O00754	Lysosomal alpha-mannosidase OS=Homo sapiens OX=9606 GN=MAN2B1 PE=1 SV=3	MAN2B1	8	1.22	0.01225	Lysosomal alpha-mannosidase	MAN2B1	8;8;2;2;2;2	1.2526	0.0099	Lysosomal alpha-mannosidase;Lysosomal alpha-mannosidase A peptide;Lysosomal alpha-mannosidase B peptide;Lysosomal alpha-mannosidase C peptide;Lysosomal alpha-mannosidase D peptide;Lysosomal alpha-mannosidase E peptide	MAN2B1	8	1.21785	0.17893
Q8NBQ5	Estradiol 17-beta-dehydrogenase 11 OS=Homo sapiens OX=9606 GN=HSD17B11 PE=1 SV=3	HSD17B11	7	1.276	0.1899	Estradiol 17-beta-dehydrogenase 11	HSD17B11		1.2524	0.0698
Q6P1M0	Long-chain fatty acid transport protein 4 OS=Homo sapiens OX=9606 GN=SLC27A4 PE=1 SV=1	SLC27A4	8	1.22	0.5409	Long-chain fatty acid transport protein 4	SLC27A4	7;4	1.2524	0.1361	Long-chain fatty acid transport protein 4	SLC27A4	7	0.955743	0.740015
Q6P2Q9	Pre-mRNA-processing-splicing factor 8 OS=Homo sapiens OX=9606 GN=PRPF8 PE=1 SV=2	PRPF8	47	1.121	0.04231	Pre-mRNA-processing-splicing factor 8	PRPF8	32;14;6	1.2523	0.0038	Pre-mRNA-processing-splicing factor 8	PRPF8	35	1.29176	0.0423895
Q3ZCQ8	Mitochondrial import inner membrane translocase subunit TIM50 OS=Homo sapiens OX=9606 GN=TIMM50 PE=1 SV=2	TIMM50	6	1.313	0.02833	Mitochondrial import inner membrane translocase subunit TIM50	TIMM50	6;6;5;5;5;2;1;1	1.2517	0.0224	Mitochondrial import inner membrane translocase subunit TIM50	TIMM50	6	1.26648	0.12314
O43670	BUB3-interacting and GLEBS motif-containing protein ZNF207 OS=Homo sapiens OX=9606 GN=ZNF207 PE=1 SV=1	ZNF207	2	1.106	0.1723	BUB3-interacting and GLEBS motif-containing protein ZNF207	ZNF207		1.2517	0.001
A0A0U1RRL7						Protein MMP24OS	MMP24OS		1.2513	0.1276
Q96EB6						NAD-dependent protein deacetylase sirtuin-1	SIRT1		1.2513	0.1492
P30876	DNA-directed RNA polymerase II subunit RPB2 OS=Homo sapiens OX=9606 GN=POLR2B PE=1 SV=1	POLR2B	14	1.016	0.8492	DNA-directed RNA polymerase II subunit RPB2	POLR2B		1.2501	0.0061
Q9H089	Large subunit GTPase 1 homolog OS=Homo sapiens OX=9606 GN=LSG1 PE=1 SV=2	LSG1	4	0.988	0.9551	Large subunit GTPase 1 homolog	LSG1	7;2;2	1.2501	0.1585	Large subunit GTPase 1 homolog	LSG1	7	1.02618	0.800277
P84022	Mothers against decapentaplegic homolog 3 OS=Homo sapiens OX=9606 GN=SMAD3 PE=1 SV=1	SMAD3	1	0.957	0.6467	Mothers against decapentaplegic homolog 3	SMAD3		1.25	0.0314
Q9C0B1	Alpha-ketoglutarate-dependent dioxygenase FTO OS=Homo sapiens OX=9606 GN=FTO PE=1 SV=3	FTO	9	1.223	0.4457	Alpha-ketoglutarate-dependent dioxygenase FTO	FTO		1.2499	0.0336
P41227	N-alpha-acetyltransferase 10 OS=Homo sapiens OX=9606 GN=NAA10 PE=1 SV=1	NAA10	5	1.04	0.4302	N-alpha-acetyltransferase 10	NAA10		1.2498	0.1693
P31350	Ribonucleoside-diphosphate reductase subunit M2 OS=Homo sapiens OX=9606 GN=RRM2 PE=1 SV=1	RRM2	2	1.314	0.2743	Ribonucleoside-diphosphate reductase subunit M2	RRM2		1.2492	0.0968
Q8NCW5	NAD(P)H-hydrate epimerase OS=Homo sapiens OX=9606 GN=NAXE PE=1 SV=2	APOA1BP; NAXE	7	1.114	0.3874	NAD(P)H-hydrate epimerase	NAXE	3;3;1;1	1.2491	0.0067	NAD(P)H-hydrate epimerase	APOA1BP	3	1.04896	0.747339
Q99439	Calponin-2 OS=Homo sapiens OX=9606 GN=CNN2 PE=1 SV=4	CNN2	6	1.246	0.03625	Calponin-2	CNN2		1.2489	0.0306
Q13573	SNW domain-containing protein 1 OS=Homo sapiens OX=9606 GN=SNW1 PE=1 SV=1	SNW1	6	1.67	0.03396	SNW domain-containing protein 1	SNW1		1.2487	0.0403
Q13185	Chromobox protein homolog 3 OS=Homo sapiens OX=9606 GN=CBX3 PE=1 SV=4	CBX3; C15orf57; CCDC32	7	1.361	0.004349	Chromobox protein homolog 3	CBX3	3;1;1;1	1.2487	0.0015	Chromobox protein homolog 3	CBX3	3	1.47233	0.0429204
Q9Y221	60S ribosome subunit biogenesis protein NIP7 homolog OS=Homo sapiens OX=9606 GN=NIP7 PE=1 SV=1	NIP7	2	0.818	0.3551	60S ribosome subunit biogenesis protein NIP7 homolog	NIP7		1.2487	0.0683
P31153	S-adenosylmethionine synthase isoform type-2 OS=Homo sapiens OX=9606 GN=MAT2A PE=1 SV=1	MAT2A	11	1.093	0.04923	S-adenosylmethionine synthase isoform type-2	MAT2A	6	1.2485	0.0141	S-adenosylmethionine synthase isoform type-2	MAT2A	6	1.12339	0.441217
O15111	Inhibitor of nuclear factor kappa-B kinase subunit alpha OS=Homo sapiens OX=9606 GN=CHUK PE=1 SV=2	CHUK	2	1.122	0.3093	Inhibitor of nuclear factor kappa-B kinase subunit alpha	CHUK	3	1.2484	0.5471	Inhibitor of nuclear factor kappa-B kinase subunit alpha	CHUK	3	0.716689	0.159524
O94901	SUN domain-containing protein 1 OS=Homo sapiens OX=9606 GN=SUN1 PE=1 SV=3	SUN1	16	0.884	0.139	SUN domain-containing protein 1	SUN1	8;8;8;8;7;6;6;6;3;2;2;2;2;2;1;1;1;1;1	1.2482	0.1555	SUN domain-containing protein 1	SUN1	8	0.819419	0.305017
Q9H0E2	Toll-interacting protein OS=Homo sapiens OX=9606 GN=TOLLIP PE=1 SV=1	TOLLIP	4	1.009	0.8439	Toll-interacting protein	TOLLIP	2;1;1;1;1;1;1	1.2471	0.212	Toll-interacting protein	TOLLIP	2	1.31143	0.280767
Q8WWH5						Probable tRNA pseudouridine synthase 1	TRUB1		1.247	0.2464
P50583	Bis(5'-nucleosyl)-tetraphosphatase [asymmetrical] OS=Homo sapiens OX=9606 GN=NUDT2 PE=1 SV=3	NUDT2	2	0.759	0.2022	Bis(5'-nucleosyl)-tetraphosphatase [asymmetrical]	NUDT2	3	1.2469	0.0101	Bis(5-nucleosyl)-tetraphosphatase [asymmetrical]	NUDT2	3	1.08254	0.455628
Q9UBE0	SUMO-activating enzyme subunit 1 OS=Homo sapiens OX=9606 GN=SAE1 PE=1 SV=1	SAE1	10	0.933	0.5134	SUMO-activating enzyme subunit 1	SAE1		1.2467	0.0203
O15116						U6 snRNA-associated Sm-like protein LSm1	LSM1		1.2466	0.2545
Q96QG7	Myotubularin-related protein 9 OS=Homo sapiens OX=9606 GN=MTMR9 PE=1 SV=1	MTMR9	5	0.862	0.6571	Myotubularin-related protein 9	MTMR9	4;4	1.2465	0.406	Myotubularin-related protein 9	MTMR9	4	1.07041	0.768254
Q13459	Unconventional myosin-IXb OS=Homo sapiens OX=9606 GN=MYO9B PE=1 SV=3	MYO9B	23	1.373	0.00408	Unconventional myosin-IXb	MYO9B		1.2456	0.0031
Q6ZSJ8	Uncharacterized protein C1orf122 OS=Homo sapiens OX=9606 GN=C1orf122 PE=4 SV=2	C1orf122	1	0.597	0.1813	Uncharacterized protein C1orf122	C1orf122		1.2456	0.2651
Q969S3						Zinc finger protein 622	ZNF622		1.2454	0.2038
Q8NFH3	Nucleoporin Nup43 OS=Homo sapiens OX=9606 GN=NUP43 PE=1 SV=1	NUP43	4	1.502	0.04215	Nucleoporin Nup43	NUP43	2;1	1.2452	0.1631	Nucleoporin Nup43	NUP43	2	1.01899	0.856359
Q5VZF2	Muscleblind-like protein 2 OS=Homo sapiens OX=9606 GN=MBNL2 PE=1 SV=2	MBNL2	2	1.073	0.4369	Muscleblind-like protein 2	MBNL2		1.2448	0.061
Q9NS86	LanC-like protein 2 OS=Homo sapiens OX=9606 GN=LANCL2 PE=1 SV=1	LANCL2	6	1.248	0.1062	LanC-like protein 2	LANCL2	2	1.2447	0.1691	LanC-like protein 2	LANCL2	2	1.01491	0.916991
Q7Z4H3	5'-deoxynucleotidase HDDC2 OS=Homo sapiens OX=9606 GN=HDDC2 PE=1 SV=1	HDDC2	2	1.446	0.3745	5'-deoxynucleotidase HDDC2	HDDC2		1.2439	0.1572
Q6WKZ4	Rab11 family-interacting protein 1 OS=Homo sapiens OX=9606 GN=RAB11FIP1 PE=1 SV=3	RAB11FIP1	3	0.909	0.8381	Rab11 family-interacting protein 1;Rab11 family-interacting protein 2	RAB11FIP1;RAB11FIP2		1.2438	0.1898
Q86UK7	E3 ubiquitin-protein ligase ZNF598 OS=Homo sapiens OX=9606 GN=ZNF598 PE=1 SV=1	ZNF598	6	0.93	0.414	E3 ubiquitin-protein ligase ZNF598	ZNF598		1.2435	0.0108
Q9Y243	RAC-gamma serine/threonine-protein kinase OS=Homo sapiens OX=9606 GN=AKT3 PE=1 SV=1	AKT3	5	1.04	0.8547	RAC-gamma serine/threonine-protein kinase	AKT3		1.2433	0.0637
Q9Y3B8	Oligoribonuclease, mitochondrial OS=Homo sapiens OX=9606 GN=REXO2 PE=1 SV=3	REXO2	6	1.182	0.05297	Oligoribonuclease, mitochondrial	REXO2		1.2427	0.0109
O00422	Histone deacetylase complex subunit SAP18 OS=Homo sapiens OX=9606 GN=SAP18 PE=1 SV=1	SAP18	3	1.52	0.3403	Histone deacetylase complex subunit SAP18	SAP18		1.2423	0.2099
Q9NWU5	39S ribosomal protein L22, mitochondrial OS=Homo sapiens OX=9606 GN=MRPL22 PE=1 SV=1	MRPL22	3	0.88	0.6483	39S ribosomal protein L22, mitochondrial	MRPL22		1.2417	0.458
Q9HBH5	Retinol dehydrogenase 14 OS=Homo sapiens OX=9606 GN=RDH14 PE=1 SV=1	RDH14	5	0.904	0.5812	Retinol dehydrogenase 14	RDH14	3	1.2416	0.1586	Retinol dehydrogenase 14	RDH14	3	0.871263	0.175878
Q8NCE2						Myotubularin-related protein 14	MTMR14		1.2412	0.1316
Q9Y343						Sorting nexin-24	SNX24		1.241	0.1894
Q92925	SWI/SNF-related matrix-associated actin-dependent regulator of chromatin subfamily D member 2 OS=Homo sapiens OX=9606 GN=SMARCD2 PE=1 SV=3	SMARCD2	4	0.836	0.177	SWI/SNF-related matrix-associated actin-dependent regulator of chromatin subfamily D member 2	SMARCD2		1.2409	0.1172
Q09028	Histone-binding protein RBBP4 OS=Homo sapiens OX=9606 GN=RBBP4 PE=1 SV=3	RBBP4	10	1.155	0.06068	Histone-binding protein RBBP4	RBBP4		1.2408	0.0341
Q96F85	CB1 cannabinoid receptor-interacting protein 1 OS=Homo sapiens OX=9606 GN=CNRIP1 PE=1 SV=1	CNRIP1	3	0.984	0.9225	CB1 cannabinoid receptor-interacting protein 1	CNRIP1		1.2406	0.0025
Q32MZ4	Leucine-rich repeat flightless-interacting protein 1 OS=Homo sapiens OX=9606 GN=LRRFIP1 PE=1 SV=2	LRRFIP1	11	0.944	0.5605	Leucine-rich repeat flightless-interacting protein 1	LRRFIP1	4;4;4	1.2402	0.0518	Leucine-rich repeat flightless-interacting protein 1	LRRFIP1	4	1.12048	0.639952
Q9H9Y2						Ribosome production factor 1	RPF1		1.2399	0.2183
P83916	Chromobox protein homolog 1 OS=Homo sapiens OX=9606 GN=CBX1 PE=1 SV=1	CBX1	6	1.382	0.294	Chromobox protein homolog 1	CBX1		1.2396	0.1657
Q9P258	Protein RCC2 OS=Homo sapiens OX=9606 GN=RCC2 PE=1 SV=2	RCC2	12	1.452	0.002937	Protein RCC2	RCC2	4	1.2389	0.0128	Protein RCC2	RCC2	4	1.39046	0.0298426
Q92888	Rho guanine nucleotide exchange factor 1 OS=Homo sapiens OX=9606 GN=ARHGEF1 PE=1 SV=2	ARHGEF1	13	2.889	0.2065	Rho guanine nucleotide exchange factor 1	ARHGEF1		1.2382	0.0093
P19174	1-phosphatidylinositol 4,5-bisphosphate phosphodiesterase gamma-1 OS=Homo sapiens OX=9606 GN=PLCG1 PE=1 SV=1	PLCG1	9	1.417	0.1689	1-phosphatidylinositol 4,5-bisphosphate phosphodiesterase gamma-1	PLCG1	4;4;1;1;1	1.238	0.1871	1-phosphatidylinositol 4,5-bisphosphate phosphodiesterase gamma-1	PLCG1	5	1.17827	0.293066
Q9BRP4	Proteasomal ATPase-associated factor 1 OS=Homo sapiens OX=9606 GN=PAAF1 PE=1 SV=2	PAAF1	3	0.88		Proteasomal ATPase-associated factor 1	PAAF1		1.2377	0.1039
O43741	5'-AMP-activated protein kinase subunit beta-2 OS=Homo sapiens OX=9606 GN=PRKAB2 PE=1 SV=1	LOC101060511; PRKAB2	3	0.553	0.05783	5'-AMP-activated protein kinase subunit beta-2	PRKAB2	3;1	1.2376	0.3817	5-AMP-activated protein kinase subunit beta-2	PRKAB2	3	0.895202	0.423786
Q8IZD4						mRNA-decapping enzyme 1B	DCP1B		1.2372	0.4649
Q16254						Transcription factor E2F4	E2F4		1.2367	0.153
Q9UKV8	Protein argonaute-2 OS=Homo sapiens OX=9606 GN=AGO2 PE=1 SV=3	AGO2; EIF2C2	8	1.078	0.5728	Protein argonaute-2	AGO2	7;7	1.2363	0.4896	Protein argonaute-2	AGO2	7	0.909967	0.601931
Q14999	Cullin-7 OS=Homo sapiens OX=9606 GN=CUL7 PE=1 SV=2	CUL7	6	0.721	0.06104	Cullin-7	CUL7		1.2361	0.0723
P0C870						Bifunctional peptidase and (3S)-lysyl hydroxylase JMJD7	JMJD7		1.2353	0.3757
Q92922	SWI/SNF complex subunit SMARCC1 OS=Homo sapiens OX=9606 GN=SMARCC1 PE=1 SV=3	SMARCC1	8	1.229	0.1829	SWI/SNF complex subunit SMARCC1	SMARCC1		1.235	0.0827
Q5TC63						Growth hormone-regulated TBC protein 1	GRTP1		1.2348	0.1561
Q9Y3C1						Nucleolar protein 16	NOP16		1.2344	0.342
Q96EU7	C1GALT1-specific chaperone 1 OS=Homo sapiens OX=9606 GN=C1GALT1C1 PE=1 SV=1	C1GALT1C1	2	1.069	0.698	C1GALT1-specific chaperone 1	C1GALT1C1	2	1.2342	0.1875	C1GALT1-specific chaperone 1	C1GALT1C1	2
Q9UBQ7	Glyoxylate reductase/hydroxypyruvate reductase OS=Homo sapiens OX=9606 GN=GRHPR PE=1 SV=1	GRHPR	10	1.25	0.0008635	Glyoxylate reductase/hydroxypyruvate reductase	GRHPR	9;8;1	1.2333	0.036	Glyoxylate reductase/hydroxypyruvate reductase	GRHPR	9	1.30312	0.146354
O75382	Tripartite motif-containing protein 3 OS=Homo sapiens OX=9606 GN=TRIM3 PE=1 SV=2	TRIM3	6	1.76	0.1731	Tripartite motif-containing protein 3	TRIM3		1.2332	0.118
O00622	CCN family member 1 OS=Homo sapiens OX=9606 GN=CCN1 PE=1 SV=1	CYR61	9	0.971	0.6635	CCN family member 1	CCN1	4	1.2331	0.1099	Protein CYR61	CYR61	4	1.08276	0.832362
Q92520	Protein FAM3C OS=Homo sapiens OX=9606 GN=FAM3C PE=1 SV=1	FAM3C; WNT16	5	0.855	0.08977	Protein FAM3C	FAM3C		1.2329	0.3651
Q00796	Sorbitol dehydrogenase OS=Homo sapiens OX=9606 GN=SORD PE=1 SV=4	SORD	5	1.142	0.5615	Sorbitol dehydrogenase	SORD	2;1;1;1	1.2326	0.1211	Sorbitol dehydrogenase	SORD	2	1.45688	0.0178166
P42694	Probable helicase with zinc finger domain OS=Homo sapiens OX=9606 GN=HELZ PE=1 SV=2	HELZ	3	0.949	0.7637	Probable helicase with zinc finger domain	HELZ		1.2326	0.1316
O43143	Pre-mRNA-splicing factor ATP-dependent RNA helicase DHX15 OS=Homo sapiens OX=9606 GN=DHX15 PE=1 SV=2	DHX15	24	1.128	0.01583	Pre-mRNA-splicing factor ATP-dependent RNA helicase DHX15	DHX15	14	1.2324	0.0042	Pre-mRNA-splicing factor ATP-dependent RNA helicase DHX15	DHX15	14	1.24557	0.0257573
P18583	Protein SON OS=Homo sapiens OX=9606 GN=SON PE=1 SV=4	SON	12	1.117	0.1192	Protein SON	SON	9;9;8;8;8;8;8;8;8;5;4;2;1	1.2316	0.0704	Protein SON	SON	9	1.33305	0.0386877
P19447						General transcription and DNA repair factor IIH helicase subunit XPB	ERCC3		1.2312	0.6772
P09493	Tropomyosin alpha-1 chain OS=Homo sapiens OX=9606 GN=TPM1 PE=1 SV=2	TPM1	19	0.961	0.5832	Tropomyosin alpha-1 chain	TPM1	9;9;9;9;8;8;7;7;7;6;6;6;6;6;6;5;4;3;3;1;1	1.2311	0.4331	Tropomyosin alpha-1 chain	TPM1	9	0.73082	0.0801157
Q9Y496						Kinesin-like protein KIF3A	KIF3A		1.2309	0.4029
Q02880	DNA topoisomerase 2-beta OS=Homo sapiens OX=9606 GN=TOP2B PE=1 SV=3	TOP2B	21	1.14	0.05258	DNA topoisomerase 2-beta	TOP2B	19;19;16;1	1.2308	0.0266	DNA topoisomerase 2-beta;DNA topoisomerase 2	TOP2B	19	1.22087	0.0600833
P26368	Splicing factor U2AF 65 kDa subunit OS=Homo sapiens OX=9606 GN=U2AF2 PE=1 SV=4	U2AF2	8	1.063	0.3585	Splicing factor U2AF 65 kDa subunit	U2AF2		1.2306	0.0023
Q8NBM4	Ubiquitin-associated domain-containing protein 2 OS=Homo sapiens OX=9606 GN=UBAC2 PE=1 SV=1	UBAC2	3	0.928	0.8005	Ubiquitin-associated domain-containing protein 2	UBAC2		1.2306	0.4336
O60291						E3 ubiquitin-protein ligase MGRN1	MGRN1		1.2306	0.1354
P11182						Lipoamide acyltransferase component of branched-chain alpha-keto acid dehydrogenase complex, mitochondrial	DBT		1.2304	0.5776
O95716	Ras-related protein Rab-3D OS=Homo sapiens OX=9606 GN=RAB3D PE=1 SV=1	RAB3D	8	1.136	0.3894	Ras-related protein Rab-3D	RAB3D		1.2298	0.0931
Q03701	CCAAT/enhancer-binding protein zeta OS=Homo sapiens OX=9606 GN=CEBPZ PE=1 SV=3	CEBPZ	6	1.3	0.3907	CCAAT/enhancer-binding protein zeta	CEBPZ	6;1	1.2288	0.2004	CCAAT/enhancer-binding protein zeta	CEBPZ	6	1.28285	0.0844573
Q13630	GDP-L-fucose synthase OS=Homo sapiens OX=9606 GN=GFUS PE=1 SV=1	TSTA3	7	0.944	0.585	GDP-L-fucose synthase	GFUS		1.2288	0.1644
Q8N442						Translation factor GUF1, mitochondrial	GUF1		1.2287	0.3246
Q6ZNB6	NF-X1-type zinc finger protein NFXL1 OS=Homo sapiens OX=9606 GN=NFXL1 PE=1 SV=2	NFXL1	2	1.133	0.8018	NF-X1-type zinc finger protein NFXL1	NFXL1		1.2285	0.1137
Q14444	Caprin-1 OS=Homo sapiens OX=9606 GN=CAPRIN1 PE=1 SV=2	CAPRIN1	9	1.028	0.8467	Caprin-1	CAPRIN1	4;4;3;3	1.2282	0.132	Caprin-1	CAPRIN1	4	1.31772	0.29561
Q969T4	Ubiquitin-conjugating enzyme E2 E3 OS=Homo sapiens OX=9606 GN=UBE2E3 PE=1 SV=1	UBE2E3	3	1.994	0.01105	Ubiquitin-conjugating enzyme E2 E3;Ubiquitin-conjugating enzyme E2 E2	UBE2E3;UBE2E2		1.2281	0.0371
O75347	Tubulin-specific chaperone A OS=Homo sapiens OX=9606 GN=TBCA PE=1 SV=3	TBCA	5	0.824	0.04153	Tubulin-specific chaperone A	TBCA		1.228	0.3417
Q8NFH5	Nucleoporin NUP35 OS=Homo sapiens OX=9606 GN=NUP35 PE=1 SV=1	NUP35	4	1.754	0.003299	Nucleoporin NUP35	NUP35	2;2;1;1;1;1	1.2279	0.0371	Nucleoporin NUP53	NUP35	2	1.11962	0.302518
O75817						Ribonuclease P protein subunit p20	POP7		1.2278	0.6035
Q9Y3B2	Exosome complex component CSL4 OS=Homo sapiens OX=9606 GN=EXOSC1 PE=1 SV=1	EXOSC1	3	1.334	0.3256	Exosome complex component CSL4	EXOSC1	5;4;4;4;4;3	1.2274	0.0963	Exosome complex component CSL4	EXOSC1	5	1.02126	0.927197
Q5T5C0	Syntaxin-binding protein 5 OS=Homo sapiens OX=9606 GN=STXBP5 PE=1 SV=1	STXBP5	5	1.025	0.8371	Syntaxin-binding protein 5	STXBP5	7;6;6;3;1;1	1.2274	0.049	Syntaxin-binding protein 5	STXBP5	7	0.936825	0.44174
O60306	RNA helicase aquarius OS=Homo sapiens OX=9606 GN=AQR PE=1 SV=4	AQR	4	1.606	0.1032	RNA helicase aquarius	AQR		1.2273	0.1082
O43819	Protein SCO2 homolog, mitochondrial OS=Homo sapiens OX=9606 GN=SCO2 PE=1 SV=3	SCO2	1	0.833	0.3008	Protein SCO2 homolog, mitochondrial	SCO2		1.2272	0.3782
A6NIH7	Protein unc-119 homolog B OS=Homo sapiens OX=9606 GN=UNC119B PE=1 SV=1	UNC119B	3	1.463	0.3571	Protein unc-119 homolog B	UNC119B		1.2271	0.0376
Q13330	Metastasis-associated protein MTA1 OS=Homo sapiens OX=9606 GN=MTA1 PE=1 SV=2	MTA1	8	1.005	0.9899	Metastasis-associated protein MTA1	MTA1		1.2264	0.0211
O95983	Methyl-CpG-binding domain protein 3 OS=Homo sapiens OX=9606 GN=MBD3 PE=1 SV=1	MBD3	1	1.919	0.03202	Methyl-CpG-binding domain protein 3	MBD3		1.2261	0.191
Q9BVP2	Guanine nucleotide-binding protein-like 3 OS=Homo sapiens OX=9606 GN=GNL3 PE=1 SV=2	GNL3	12	1.286	0.08553	Guanine nucleotide-binding protein-like 3	GNL3	7;7	1.226	0.1347	Guanine nucleotide-binding protein-like 3	GNL3	7	1.3094	0.042219
P49585	Choline-phosphate cytidylyltransferase A OS=Homo sapiens OX=9606 GN=PCYT1A PE=1 SV=2	PCYT1A	7	1.204	0.04869	Choline-phosphate cytidylyltransferase A	PCYT1A		1.2258	0.043
Q8N5W9	Refilin-B OS=Homo sapiens OX=9606 GN=RFLNB PE=1 SV=1	FAM101B; RFLNB	3	0.674	0.1424	Refilin-B	RFLNB	3	1.2258	0.025	Filamin-interacting protein FAM101B	FAM101B	3	1.17482	0.341142
Q9BXS6						Nucleolar and spindle-associated protein 1	NUSAP1		1.225	0.6654
Q9HBH1						Peptide deformylase, mitochondrial	PDF		1.225	0.4447
P52788	Spermine synthase OS=Homo sapiens OX=9606 GN=SMS PE=1 SV=2	SMS	11	1.144	0.04299	Spermine synthase	SMS	8;6;4	1.2248	0.029	Spermine synthase	SMS	8	1.17316	0.18695
Q9HAD4	WD repeat-containing protein 41 OS=Homo sapiens OX=9606 GN=WDR41 PE=1 SV=3	WDR41	4	1.1	0.7504	WD repeat-containing protein 41	WDR41		1.2242	0.3096
Q15599	Na(+)/H(+) exchange regulatory cofactor NHE-RF2 OS=Homo sapiens OX=9606 GN=SLC9A3R2 PE=1 SV=2	SLC9A3R2	3	0.603	0.3173	Na(+)/H(+) exchange regulatory cofactor NHE-RF2	SLC9A3R2		1.2238	0.1379
O15258	Protein RER1 OS=Homo sapiens OX=9606 GN=RER1 PE=1 SV=1	RER1	2	0.799	0.3371	Protein RER1	RER1		1.2234	0.2052
O15533	Tapasin OS=Homo sapiens OX=9606 GN=TAPBP PE=1 SV=1	TAPBP	2	0.744	0.2302	Tapasin	TAPBP		1.2225	0.5661
Q8N3F8	MICAL-like protein 1 OS=Homo sapiens OX=9606 GN=MICALL1 PE=1 SV=2	MICALL1	3	0.767	0.1907	MICAL-like protein 1	MICALL1	5;1;1;0	1.2224	0.378	MICAL-like protein 1	MICALL1	6	0.894114	0.46287
Q9Y3C6	Peptidyl-prolyl cis-trans isomerase-like 1 OS=Homo sapiens OX=9606 GN=PPIL1 PE=1 SV=1	PPIL1	2	0.836	0.08961	Peptidyl-prolyl cis-trans isomerase-like 1	PPIL1		1.2223	0.5214
P53041	Serine/threonine-protein phosphatase 5 OS=Homo sapiens OX=9606 GN=PPP5C PE=1 SV=1	PPP5C	7	1.162	0.1293	Serine/threonine-protein phosphatase 5	PPP5C	4;4;1	1.2221	0.3818	Serine/threonine-protein phosphatase 5;Serine/threonine-protein phosphatase	PPP5C	4	1.03332	0.703597
Q13505	Metaxin-1 OS=Homo sapiens OX=9606 GN=MTX1 PE=1 SV=3		4	1.136	0.4223	Metaxin-1	MTX1		1.2219	0.1401
Q6IN85	Serine/threonine-protein phosphatase 4 regulatory subunit 3A OS=Homo sapiens OX=9606 GN=PPP4R3A PE=1 SV=1	SMEK1; PPP4R3A	4	1.419	0.3769	Serine/threonine-protein phosphatase 4 regulatory subunit 3A	PPP4R3A		1.2218	0.305
O96019	Actin-like protein 6A OS=Homo sapiens OX=9606 GN=ACTL6A PE=1 SV=1	ACTL6A	3	3.871	0.003714	Actin-like protein 6A	ACTL6A	4;3;2;1	1.2214	0.1687	Actin-like protein 6A;Actin-like protein 6B	ACTL6A;ACTL6B	4	1.37386	0.00507806
P17081	Rho-related GTP-binding protein RhoQ OS=Homo sapiens OX=9606 GN=RHOQ PE=1 SV=2	RHOQ	3	1.008	0.993	Rho-related GTP-binding protein RhoQ	RHOQ	2	1.2213	0.364	Rho-related GTP-binding protein RhoQ	RHOQ	2	0.955789	0.874209
Q13555	Calcium/calmodulin-dependent protein kinase type II subunit gamma OS=Homo sapiens OX=9606 GN=CAMK2G PE=1 SV=4		7	0.848	0.3623	Calcium/calmodulin-dependent protein kinase type II subunit gamma	CAMK2G		1.2212	0.0893
Q08722	Leukocyte surface antigen CD47 OS=Homo sapiens OX=9606 GN=CD47 PE=1 SV=1	CD47	3	0.702	0.009637	Leukocyte surface antigen CD47	CD47		1.2207	0.1215
Q8NE00	Transmembrane protein 104 OS=Homo sapiens OX=9606 GN=TMEM104 PE=1 SV=2	TMEM104	2	0.331	0.3414	Transmembrane protein 104	TMEM104		1.2207	0.315
Q9P2B4	CTTNBP2 N-terminal-like protein OS=Homo sapiens OX=9606 GN=CTTNBP2NL PE=1 SV=2	CTTNBP2NL	6	1.077	0.7734	CTTNBP2 N-terminal-like protein	CTTNBP2NL		1.2205	0.2376
Q9UBB5						Methyl-CpG-binding domain protein 2	MBD2		1.2205	0.2808
Q15942	Zyxin OS=Homo sapiens OX=9606 GN=ZYX PE=1 SV=1	ZYX	16	1.113	0.1366	Zyxin	ZYX	5;4;4;2;1;1;1	1.22	0.1522	Zyxin	ZYX	8	1.18927	0.207424
O95861	3'(2'),5'-bisphosphate nucleotidase 1 OS=Homo sapiens OX=9606 GN=BPNT1 PE=1 SV=1	BPNT1	7	1.022	0.8452	3'(2'),5'-bisphosphate nucleotidase 1	BPNT1		1.2199	0.1038
P30154						Serine/threonine-protein phosphatase 2A 65 kDa regulatory subunit A beta isoform	PPP2R1B	7;7;7;6;5;3	1.2197	0.4377	Serine/threonine-protein phosphatase 2A 65 kDa regulatory subunit A beta isoform	PPP2R1B	7	0.988376	0.96605
P41223	Protein BUD31 homolog OS=Homo sapiens OX=9606 GN=BUD31 PE=1 SV=2	BUD31	5	1.389	0.1208	Protein BUD31 homolog	BUD31	3;3;1;1	1.2196	0.1478	Protein BUD31 homolog	BUD31	3	1.36401	0.166026
P37198	Nuclear pore glycoprotein p62 OS=Homo sapiens OX=9606 GN=NUP62 PE=1 SV=3	NUP62	5	1.201	0.3642	Nuclear pore glycoprotein p62	NUP62	3;2	1.2196	0.1842	Nuclear pore glycoprotein p62	NUP62	3	1.14568	0.393678
Q9UKX7	Nuclear pore complex protein Nup50 OS=Homo sapiens OX=9606 GN=NUP50 PE=1 SV=2	NUP50	2	0.728	0.1086	Nuclear pore complex protein Nup50	NUP50		1.2195	0.1866
P35813	Protein phosphatase 1A OS=Homo sapiens OX=9606 GN=PPM1A PE=1 SV=1	PPM1A	2	0.874	0.5022	Protein phosphatase 1A	PPM1A	5;5;4;1	1.2194	0.3683	Protein phosphatase 1A	PPM1A	5	1.10395	0.436946
Q8IU81	Interferon regulatory factor 2-binding protein 1 OS=Homo sapiens OX=9606 GN=IRF2BP1 PE=1 SV=1	IRF2BP1	1	1.095	0.5026	Interferon regulatory factor 2-binding protein 1	IRF2BP1		1.2193	0.5154
Q96GX9						Methylthioribulose-1-phosphate dehydratase	APIP		1.2193	0.5584
Q9BZE9	Tether containing UBX domain for GLUT4 OS=Homo sapiens OX=9606 GN=ASPSCR1 PE=1 SV=1	ASPSCR1	4	0.766	0.2928	Tether containing UBX domain for GLUT4	ASPSCR1	5;5;4;3;3;3;2;1;1;1;1;1	1.2186	0.0313	Tether containing UBX domain for GLUT4	ASPSCR1	5	0.931167	0.668738
Q9HCL0	Protocadherin-18 OS=Homo sapiens OX=9606 GN=PCDH18 PE=1 SV=3	PCDH18	2	1.651	0.03895	Protocadherin-18	PCDH18		1.2184	0.2444
Q14676						Mediator of DNA damage checkpoint protein 1	MDC1		1.2184	0.4137
Q9BZF3						Oxysterol-binding protein-related protein 6	OSBPL6		1.2184	0.5546
Q96J84	Kin of IRRE-like protein 1 OS=Homo sapiens OX=9606 GN=KIRREL1 PE=1 SV=2	KIRREL; KIRREL1	6	2.31	0.005174	Kin of IRRE-like protein 1	KIRREL1	7;7;5;5;4;4	1.2181	0.0106	Kin of IRRE-like protein 1	KIRREL	7	0.950131	0.725728
O75116	Rho-associated protein kinase 2 OS=Homo sapiens OX=9606 GN=ROCK2 PE=1 SV=4	ROCK2	32	1.152	0.04495	Rho-associated protein kinase 2	ROCK2	19;17;7;6;4	1.218	0.0077	Rho-associated protein kinase 2	ROCK2	19	1.19746	0.103022
Q15233	Non-POU domain-containing octamer-binding protein OS=Homo sapiens OX=9606 GN=NONO PE=1 SV=4	NONO	9	0.923	0.3997	Non-POU domain-containing octamer-binding protein	NONO	5;4;4;4;2;1	1.2177	0.1459	Non-POU domain-containing octamer-binding protein	NONO	6	1.17029	0.227196
Q9H0C8						Integrin-linked kinase-associated serine/threonine phosphatase 2C	ILKAP		1.2177	0.5728
Q9H1A4	Anaphase-promoting complex subunit 1 OS=Homo sapiens OX=9606 GN=ANAPC1 PE=1 SV=1	ANAPC1	3	1.157	0.4997	Anaphase-promoting complex subunit 1	ANAPC1	2;1	1.2176	0.1822	Anaphase-promoting complex subunit 1	ANAPC1	2	1.1433	0.334176
Q15125	3-beta-hydroxysteroid-Delta(8),Delta(7)-isomerase OS=Homo sapiens OX=9606 GN=EBP PE=1 SV=3	EBP	1	0.882	0.499	3-beta-hydroxysteroid-Delta(8),Delta(7)-isomerase	EBP		1.2176	0.2213
Q9H3H3	UPF0696 protein C11orf68 OS=Homo sapiens OX=9606 GN=C11orf68 PE=1 SV=3		5	1.276	0.01113	UPF0696 protein C11orf68	C11orf68	4;4;4	1.2175	0.009	UPF0696 protein C11orf68	C11orf68	4	1.11183	0.288645
P35232	Prohibitin OS=Homo sapiens OX=9606 GN=PHB PE=1 SV=1	PHB	12	1.043	0.2717	Prohibitin	PHB	8;7;6;6;6;4;3	1.2169	0.0107	Prohibitin	PHB	8	1.23442	0.024609
Q9H7C4	Syncoilin OS=Homo sapiens OX=9606 GN=SYNC PE=1 SV=3	SYNC	4	0.877	0.2582	Syncoilin	SYNC		1.2166	0.3447
P06396	Gelsolin OS=Homo sapiens OX=9606 GN=GSN PE=1 SV=1	GSN	19	1.137	0.1923	Gelsolin	GSN		1.2165	0.036
P49959	Double-strand break repair protein MRE11 OS=Homo sapiens OX=9606 GN=MRE11 PE=1 SV=3	MRE11A; MRE11	7	1.158	0.5539	Double-strand break repair protein MRE11	MRE11		1.2164	0.0606
Q5SY16	Polynucleotide 5'-hydroxyl-kinase NOL9 OS=Homo sapiens OX=9606 GN=NOL9 PE=1 SV=1	NOL9	5	0.924	0.5955	Polynucleotide 5'-hydroxyl-kinase NOL9	NOL9	2	1.2161	0.069	Polynucleotide 5-hydroxyl-kinase NOL9	NOL9	2	0.952394	0.742344
Q7Z417	Nuclear fragile X mental retardation-interacting protein 2 OS=Homo sapiens OX=9606 GN=NUFIP2 PE=1 SV=1	NUFIP2	8	0.989	0.916	Nuclear fragile X mental retardation-interacting protein 2	NUFIP2		1.2152	0.3132
Q9NV31	U3 small nucleolar ribonucleoprotein protein IMP3 OS=Homo sapiens OX=9606 GN=IMP3 PE=1 SV=1	IMP3	2	1.023	0.7597	U3 small nucleolar ribonucleoprotein protein IMP3	IMP3	2	1.2151	0.0921	U3 small nucleolar ribonucleoprotein protein IMP3	IMP3	2	1.35672	0.141805
Q4VC31	Protein MIX23 OS=Homo sapiens OX=9606 GN=MIX23 PE=1 SV=1	CCDC58	2	0.689	0.15	Coiled-coil domain-containing protein 58	CCDC58		1.2148	0.2745
P62316	Small nuclear ribonucleoprotein Sm D2 OS=Homo sapiens OX=9606 GN=SNRPD2 PE=1 SV=1	SNRPD2	6	1.335	0.155	Small nuclear ribonucleoprotein Sm D2	SNRPD2	2;2;1;1	1.2144	0.0105	Small nuclear ribonucleoprotein Sm D2	SNRPD2	2	1.36521	0.0479788
Q9NWH9	SAFB-like transcription modulator OS=Homo sapiens OX=9606 GN=SLTM PE=1 SV=2	SLTM	5	0.961	0.8633	SAFB-like transcription modulator	SLTM	5;3;2;2;2;1;1	1.2144	0.1932	SAFB-like transcription modulator	SLTM	5	1.50815	0.166998
P62851	40S ribosomal protein S25 OS=Homo sapiens OX=9606 GN=RPS25 PE=1 SV=1	RPS25	4	0.892	0.2116	40S ribosomal protein S25	RPS25	3	1.2144	0.0591	40S ribosomal protein S25	RPS25	3	1.01989	0.826046
Q86U42	Polyadenylate-binding protein 2 OS=Homo sapiens OX=9606 GN=PABPN1 PE=1 SV=3	PABPN1	2	1.175	0.3971	Polyadenylate-binding protein 2	PABPN1	3;3;2;2;2;2	1.2141	0.0459	Polyadenylate-binding protein 2	PABPN1	3	1.44563	0.0545793
P49591	Serine--tRNA ligase, cytoplasmic OS=Homo sapiens OX=9606 GN=SARS1 PE=1 SV=3	SARS	16	1.169	0.1637	Serine--tRNA ligase, cytoplasmic	SARS1		1.2139	0.0319
Q14315	Filamin-C OS=Homo sapiens OX=9606 GN=FLNC PE=1 SV=3	FLNC	124	1.168	0.008127	Filamin-C	FLNC	81;81	1.2135	0.0203	Filamin-C	FLNC	87	1.21582	0.0638016
Q9H0W8	Protein SMG9 OS=Homo sapiens OX=9606 GN=SMG9 PE=1 SV=1	SMG9	4	0.996	0.9798	Protein SMG9	SMG9	3;3;1	1.2135	0.025	Protein SMG9	SMG9	3	1.18275	0.0914256
O95479	GDH/6PGL endoplasmic bifunctional protein OS=Homo sapiens OX=9606 GN=H6PD PE=1 SV=2	H6PD	19	1.094	0.09613	GDH/6PGL endoplasmic bifunctional protein	H6PD		1.2124	0.0997
Q86V21	Acetoacetyl-CoA synthetase OS=Homo sapiens OX=9606 GN=AACS PE=1 SV=1	AACS	4	0.974	0.8517	Acetoacetyl-CoA synthetase	AACS	5;3;2;2	1.2124	0.2153	Acetoacetyl-CoA synthetase	AACS	5	1.24139	0.266118
Q9BVV7	Mitochondrial import inner membrane translocase subunit Tim21 OS=Homo sapiens OX=9606 GN=TIMM21 PE=1 SV=1	TIMM21	1	1.324	0.2087	Mitochondrial import inner membrane translocase subunit Tim21	TIMM21		1.2122	0.5976
P50148	Guanine nucleotide-binding protein G(q) subunit alpha OS=Homo sapiens OX=9606 GN=GNAQ PE=1 SV=4	GNAQ	12	1.126	0.06588	Guanine nucleotide-binding protein G(q) subunit alpha	GNAQ	9;5	1.2121	0.0624	Guanine nucleotide-binding protein G(q) subunit alpha	GNAQ	9	1.2035	0.189617
Q5RKV6	Exosome complex component MTR3 OS=Homo sapiens OX=9606 GN=EXOSC6 PE=1 SV=1	EXOSC6	4	1.027	0.928	Exosome complex component MTR3	EXOSC6	2	1.2121	0.0288	Exosome complex component MTR3	EXOSC6	2	1.45548	0.0691551
Q9NP77	RNA polymerase II subunit A C-terminal domain phosphatase SSU72 OS=Homo sapiens OX=9606 GN=SSU72 PE=1 SV=1	SSU72	2	1.574	0.267	RNA polymerase II subunit A C-terminal domain phosphatase SSU72	SSU72	2	1.212	0.0436	RNA polymerase II subunit A C-terminal domain phosphatase SSU72	SSU72	2	500	1e-20
Q9UHD8	Septin-9 OS=Homo sapiens OX=9606 GN=SEPTIN9 PE=1 SV=2	Septin-9	19	1.178	0.01241	Septin-9	SEPTIN9	11;11;11;11;9;7;7;7;4;4;3;3;3;3;2;2;2;2;2;2;2;2;2;2;2;1;1	1.2117	0.0008	Septin-9	Septin-9	12	1.31067	0.0108876
Q58FF6						Putative heat shock protein HSP 90-beta 4	HSP90AB4P		1.2114	0.4456
Q9Y2Q5	Ragulator complex protein LAMTOR2 OS=Homo sapiens OX=9606 GN=LAMTOR2 PE=1 SV=1	LAMTOR2	3	1.009	0.912	Ragulator complex protein LAMTOR2	LAMTOR2		1.2113	0.3091
Q9UBV8	Peflin OS=Homo sapiens OX=9606 GN=PEF1 PE=1 SV=1	PEF1	2	1.028	0.9416	Peflin	PEF1		1.2111	0.2676
Q9H2J4	Phosducin-like protein 3 OS=Homo sapiens OX=9606 GN=PDCL3 PE=1 SV=1	PDCL3	6	0.957	0.5055	Phosducin-like protein 3	PDCL3	4;3;1	1.2111	0.1908	Phosducin-like protein 3	PDCL3	4	0.92281	0.341262
Q9Y487	V-type proton ATPase 116 kDa subunit a2 OS=Homo sapiens OX=9606 GN=ATP6V0A2 PE=1 SV=2	ATP6V0A2	3	1.382	0.4356	V-type proton ATPase 116 kDa subunit a2	ATP6V0A2		1.2106	0.2218
Q9HA77	Probable cysteine--tRNA ligase, mitochondrial OS=Homo sapiens OX=9606 GN=CARS2 PE=1 SV=1	CARS2	4	0.578	0.3606	Probable cysteine--tRNA ligase, mitochondrial	CARS2	2;1	1.2106	0.6672	Probable cysteine--tRNA ligase, mitochondrial	CARS2	2
Q8IY37	Probable ATP-dependent RNA helicase DHX37 OS=Homo sapiens OX=9606 GN=DHX37 PE=1 SV=1	DHX37	3	1.217	0.2645	Probable ATP-dependent RNA helicase DHX37	DHX37		1.2099	0.1969
P25445	Tumor necrosis factor receptor superfamily member 6 OS=Homo sapiens OX=9606 GN=FAS PE=1 SV=1	FAS	2	1.126	0.6241	Tumor necrosis factor receptor superfamily member 6	FAS		1.2099	0.0341
Q8TED0	U3 small nucleolar RNA-associated protein 15 homolog OS=Homo sapiens OX=9606 GN=UTP15 PE=1 SV=3	UTP15	7	1.614	0.5912	U3 small nucleolar RNA-associated protein 15 homolog	UTP15		1.2098	0.2692
Q5C9Z4	Nucleolar MIF4G domain-containing protein 1 OS=Homo sapiens OX=9606 GN=NOM1 PE=1 SV=1	NOM1	2	1.275	0.669	Nucleolar MIF4G domain-containing protein 1	NOM1	3	1.2095	0.0714	Nucleolar MIF4G domain-containing protein 1	NOM1	3	0.99484	0.929348
P31943	Heterogeneous nuclear ribonucleoprotein H OS=Homo sapiens OX=9606 GN=HNRNPH1 PE=1 SV=4	HNRNPH1	15	1.088	0.2431	Heterogeneous nuclear ribonucleoprotein H	HNRNPH1	10;10;9;6;5;5;4;4;4;3;3;3;3;3;3;3;3;3;3;2;1;1;1	1.2094	0.0417	Heterogeneous nuclear ribonucleoprotein H;Heterogeneous nuclear ribonucleoprotein H, N-terminally processed	HNRNPH1	11	1.23808	0.00971222
Q86W50						RNA N6-adenosine-methyltransferase METTL16	METTL16		1.2093	0.1502
Q86SZ2						Trafficking protein particle complex subunit 6B	TRAPPC6B		1.2092	0.4102
Q8TCE6	DENN domain-containing protein 10 OS=Homo sapiens OX=9606 GN=DENND10 PE=1 SV=1	FAM45A	6	0.904	0.4165	DENN domain-containing protein 10	DENND10		1.2091	0.3168
Q8TD43	Transient receptor potential cation channel subfamily M member 4 OS=Homo sapiens OX=9606 GN=TRPM4 PE=1 SV=1	TRPM4	5	4.837	0.1818	Transient receptor potential cation channel subfamily M member 4	TRPM4	3;3;2	1.2089	0.2186	Transient receptor potential cation channel subfamily M member 4	TRPM4	3	1.11041	0.279173
Q13033	Striatin-3 OS=Homo sapiens OX=9606 GN=STRN3 PE=1 SV=3	STRN3	10	1.051	0.5691	Striatin-3	STRN3	9	1.2087	0.0529	Striatin-3	STRN3	9	1.03353	0.740225
Q15424	Scaffold attachment factor B1 OS=Homo sapiens OX=9606 GN=SAFB PE=1 SV=4	SAFB	10	1.047	0.7441	Scaffold attachment factor B1	SAFB	8;8;8;7;1	1.2082	0.1359	Scaffold attachment factor B1	SAFB	8	1.15153	0.323511
O75390	Citrate synthase, mitochondrial OS=Homo sapiens OX=9606 GN=CS PE=1 SV=2	CS	15	0.967	0.4164	Citrate synthase, mitochondrial	CS	6;6;5;4;2;2;1;1;1;1;1;1;1;1;1;1;1;1;1	1.2082	0.0667	Citrate synthase, mitochondrial;Citrate synthase	CS	7	1.17184	0.168499
Q99459	Cell division cycle 5-like protein OS=Homo sapiens OX=9606 GN=CDC5L PE=1 SV=2	CDC5L	11	1.167	0.2728	Cell division cycle 5-like protein	CDC5L	7	1.2077	0.0083	Cell division cycle 5-like protein	CDC5L	9	1.14921	0.114309
Q13188	Serine/threonine-protein kinase 3 OS=Homo sapiens OX=9606 GN=STK3 PE=1 SV=2	STK3	2	1.163	0.3577	Serine/threonine-protein kinase 3	STK3		1.207	0.0147
P12931	Proto-oncogene tyrosine-protein kinase Src OS=Homo sapiens OX=9606 GN=SRC PE=1 SV=3	SRC	11	1.2	0.2865	Proto-oncogene tyrosine-protein kinase Src	SRC	6;6;1;1;1;1;1;1;1	1.2066	0.2717	Proto-oncogene tyrosine-protein kinase Src	SRC	6	1.06377	0.611791
Q15417	Calponin-3 OS=Homo sapiens OX=9606 GN=CNN3 PE=1 SV=1	CNN3	11	1.174	0.03872	Calponin-3	CNN3	6;5	1.2065	0.0007	Calponin-3	CNN3	6	1.25719	0.0756439
Q6NW29	RWD domain-containing protein 4 OS=Homo sapiens OX=9606 GN=RWDD4 PE=1 SV=3	RWDD4	2	1.258	0.2071	RWD domain-containing protein 4	RWDD4		1.2064	0.1288
Q9BZE4	GTP-binding protein 4 OS=Homo sapiens OX=9606 GN=GTPBP4 PE=1 SV=3	GTPBP4	11	1.212	0.02924	Nucleolar GTP-binding protein 1	GTPBP4	11;10;8;5	1.2045	0.019	Nucleolar GTP-binding protein 1	GTPBP4	12	1.21288	0.142266
Q92820	Gamma-glutamyl hydrolase OS=Homo sapiens OX=9606 GN=GGH PE=1 SV=2	GGH	9	0.96	0.6209	Gamma-glutamyl hydrolase	GGH	4	1.2041	0.1639	Gamma-glutamyl hydrolase	GGH	4	1.31939	0.147046
Q9H694	Protein bicaudal C homolog 1 OS=Homo sapiens OX=9606 GN=BICC1 PE=1 SV=2	BICC1	4	2.012	0.07086	Protein bicaudal C homolog 1	BICC1	5;4;2	1.204	0.1933	Protein bicaudal C homolog 1	BICC1	5	0.984101	0.910877
Q9NZV1						Cysteine-rich motor neuron 1 protein	CRIM1		1.2037	0.3606
Q8N122	Regulatory-associated protein of mTOR OS=Homo sapiens OX=9606 GN=RPTOR PE=1 SV=1	RPTOR	7	1.804	0.1406	Regulatory-associated protein of mTOR	RPTOR	8;7;2	1.203	0.0524	Regulatory-associated protein of mTOR	RPTOR	8	1.15133	0.180393
P04049	RAF proto-oncogene serine/threonine-protein kinase OS=Homo sapiens OX=9606 GN=RAF1 PE=1 SV=1	RAF1	2	1.023	0.9344	RAF proto-oncogene serine/threonine-protein kinase	RAF1		1.2029	0.5403
Q8WX93	Palladin OS=Homo sapiens OX=9606 GN=PALLD PE=1 SV=3	PALLD	23	1.144	0.003604	Palladin	PALLD	13;13;13;13;12;11;10;7;5;3;2;2;1;1;1	1.2028	0.0028	Palladin	PALLD	15	1.17784	0.0516172
Q66K74	Microtubule-associated protein 1S OS=Homo sapiens OX=9606 GN=MAP1S PE=1 SV=2	MAP1S	15	1.024	0.8274	Microtubule-associated protein 1S	MAP1S	8;8;2;2;1;1;1	1.2028	0.0097	Microtubule-associated protein 1S;MAP1S heavy chain;MAP1S light chain	MAP1S	9	1.01455	0.878888
Q96KR6						Protein FAM210B, mitochondrial	FAM210B		1.2028	0.5965
Q15029	116 kDa U5 small nuclear ribonucleoprotein component OS=Homo sapiens OX=9606 GN=EFTUD2 PE=1 SV=1	EFTUD2	31	1.11	0.02151	116 kDa U5 small nuclear ribonucleoprotein component	EFTUD2	17;17;16;6;5	1.2025	0.0059	116 kDa U5 small nuclear ribonucleoprotein component	EFTUD2	17	1.41242	0.0212913
Q9Y2R9	28S ribosomal protein S7, mitochondrial OS=Homo sapiens OX=9606 GN=MRPS7 PE=1 SV=2	MRPS7	3	0.845	0.5814	28S ribosomal protein S7, mitochondrial	MRPS7		1.2025	0.5185
P62310	U6 snRNA-associated Sm-like protein LSm3 OS=Homo sapiens OX=9606 GN=LSM3 PE=1 SV=2	LSM3	1	1.253	0.05652	U6 snRNA-associated Sm-like protein LSm3	LSM3		1.2024	0.1402
O75821	Eukaryotic translation initiation factor 3 subunit G OS=Homo sapiens OX=9606 GN=EIF3G PE=1 SV=2	EIF3G	10	1.003	0.9604	Eukaryotic translation initiation factor 3 subunit G	EIF3G	7;6;5;4;4;2;1	1.2023	0.0971	Eukaryotic translation initiation factor 3 subunit G	EIF3G	9	1.05512	0.618802
O43237	Cytoplasmic dynein 1 light intermediate chain 2 OS=Homo sapiens OX=9606 GN=DYNC1LI2 PE=1 SV=1	DYNC1LI2	14	0.951	0.6334	Cytoplasmic dynein 1 light intermediate chain 2	DYNC1LI2	9;7;3;3;2;1	1.2021	0.0109	Cytoplasmic dynein 1 light intermediate chain 2	DYNC1LI2	9	1.13193	0.378828
Q53ET0						CREB-regulated transcription coactivator 2	CRTC2		1.202	0.2348
P24928	DNA-directed RNA polymerase II subunit RPB1 OS=Homo sapiens OX=9606 GN=POLR2A PE=1 SV=2	POLR2A	15	1.262	0.04315	DNA-directed RNA polymerase II subunit RPB1	POLR2A	10;4	1.2019	0.0868	DNA-directed RNA polymerase II subunit RPB1	POLR2A	10	1.29324	0.22082
P31483	Nucleolysin TIA-1 isoform p40 OS=Homo sapiens OX=9606 GN=TIA1 PE=1 SV=3	TIA1	5	1.372	0.2212	Nucleolysin TIA-1 isoform p40	TIA1		1.2018	0.2976
O43924	Retinal rod rhodopsin-sensitive cGMP 3',5'-cyclic phosphodiesterase subunit delta OS=Homo sapiens OX=9606 GN=PDE6D PE=1 SV=1	PDE6D	2	1.361	0.31	Retinal rod rhodopsin-sensitive cGMP 3',5'-cyclic phosphodiesterase subunit delta	PDE6D		1.2015	0.0517
Q9H0L4	Cleavage stimulation factor subunit 2 tau variant OS=Homo sapiens OX=9606 GN=CSTF2T PE=1 SV=1	CSTF2T	4	1.575	0.2224	Cleavage stimulation factor subunit 2 tau variant	CSTF2T		1.2014	0.0246
Q9NYF8	Bcl-2-associated transcription factor 1 OS=Homo sapiens OX=9606 GN=BCLAF1 PE=1 SV=2	BCLAF1	7	1.089	0.6082	Bcl-2-associated transcription factor 1	BCLAF1		1.2013	0.0797
Q15020	Squamous cell carcinoma antigen recognized by T-cells 3 OS=Homo sapiens OX=9606 GN=SART3 PE=1 SV=1	SART3	13	0.873	0.5137	Squamous cell carcinoma antigen recognized by T-cells 3	SART3	7;7;5;4;2;2;2;2	1.2013	0.0163	Squamous cell carcinoma antigen recognized by T-cells 3	SART3	7	1.27785	0.0359315
Q9NX63	MICOS complex subunit MIC19 OS=Homo sapiens OX=9606 GN=CHCHD3 PE=1 SV=1	CHCHD3	4	1.2	0.1739	MICOS complex subunit MIC19	CHCHD3		1.201	0.0624
Q9NX47	E3 ubiquitin-protein ligase MARCHF5 OS=Homo sapiens OX=9606 GN=MARCHF5 PE=1 SV=1	2021-03-05	3	0.796	0.2693	E3 ubiquitin-protein ligase MARCHF5	MARCHF5	5	1.201	0.3173	E3 ubiquitin-protein ligase MARCH5	2021-03-05	5	0.822316	0.135748
Q13616	Cullin-1 OS=Homo sapiens OX=9606 GN=CUL1 PE=1 SV=2	CUL1	10	0.939	0.5982	Cullin-1	CUL1		1.2008	0.1025
Q9NS15						Latent-transforming growth factor beta-binding protein 3	LTBP3		1.2008	0.7224
Q9Y4D1						Disheveled-associated activator of morphogenesis 1	DAAM1		1.2008	0.4275
Q9UI30	Multifunctional methyltransferase subunit TRM112-like protein OS=Homo sapiens OX=9606 GN=TRMT112 PE=1 SV=1	TRMT112	4	1.169	0.1146	Multifunctional methyltransferase subunit TRM112-like protein	TRMT112		1.2007	0.6276
Q14746	Conserved oligomeric Golgi complex subunit 2 OS=Homo sapiens OX=9606 GN=COG2 PE=1 SV=1	COG2	6	0.854	0.457	Conserved oligomeric Golgi complex subunit 2	COG2		1.2005	0.5375
Q5VT52	Regulation of nuclear pre-mRNA domain-containing protein 2 OS=Homo sapiens OX=9606 GN=RPRD2 PE=1 SV=1	RPRD2	1	0.813		Regulation of nuclear pre-mRNA domain-containing protein 2	RPRD2	2;2;2;2;1	1.2005	0.0112	Regulation of nuclear pre-mRNA domain-containing protein 2	RPRD2	2	1.24545	0.139468
O00178	GTP-binding protein 1 OS=Homo sapiens OX=9606 GN=GTPBP1 PE=1 SV=3	GTPBP1	5	2.129	0.2365	GTP-binding protein 1	GTPBP1		1.2003	0.2688
P51812	Ribosomal protein S6 kinase alpha-3 OS=Homo sapiens OX=9606 GN=RPS6KA3 PE=1 SV=1	RPS6KA3	12	1.033	0.7615	Ribosomal protein S6 kinase alpha-3	RPS6KA3		1.2003	0.1068
Q3LXA3	Triokinase/FMN cyclase OS=Homo sapiens OX=9606 GN=TKFC PE=1 SV=2	DAK; TKFC	6	1.008	0.9716	Triokinase/FMN cyclase	TKFC	4;3;3;2	1.2002	0.0515	Bifunctional ATP-dependent dihydroxyacetone kinase/FAD-AMP lyase (cyclizing);ATP-dependent dihydroxyacetone kinase;FAD-AMP lyase (cyclizing)	DAK;TKFC	4	1.07929	0.678265
P10746	Uroporphyrinogen-III synthase OS=Homo sapiens OX=9606 GN=UROS PE=1 SV=1	UROS	1	0.718	0.1144	Uroporphyrinogen-III synthase	UROS		1.2001	0.3727
Q9H6R4	Nucleolar protein 6 OS=Homo sapiens OX=9606 GN=NOL6 PE=1 SV=2	NOL6	6	1.044	0.9174	Nucleolar protein 6	NOL6	3;3;2;2;1;0	1.2	0.2191	Nucleolar protein 6	NOL6	4	1.32548	0.0466992
P60602						Reactive oxygen species modulator 1	ROMO1		1.2	0.199
Q12874	Splicing factor 3A subunit 3 OS=Homo sapiens OX=9606 GN=SF3A3 PE=1 SV=1	SF3A3	8	1.122	0.1595	Splicing factor 3A subunit 3	SF3A3	5	1.1998	0.1201	Splicing factor 3A subunit 3	SF3A3	5	1.11729	0.518189
Q9H223	EH domain-containing protein 4 OS=Homo sapiens OX=9606 GN=EHD4 PE=1 SV=1	EHD4	20	1.022	0.5316	EH domain-containing protein 4	EHD4	12	1.1997	0.0321	EH domain-containing protein 4	EHD4	12	1.28983	0.0340319
Q96SY0						Integrator complex subunit 14	INTS14		1.1995	0.4938
Q9NP66						High mobility group protein 20A	HMG20A		1.1991	0.6208
Q5T9A4	ATPase family AAA domain-containing protein 3B OS=Homo sapiens OX=9606 GN=ATAD3B PE=1 SV=1	ATAD3B	10	1.08	0.6258	ATPase family AAA domain-containing protein 3B	ATAD3B		1.1981	0.1235
Q13614	Myotubularin-related protein 2 OS=Homo sapiens OX=9606 GN=MTMR2 PE=1 SV=4	MTMR2	4	1.292	0.3958	Myotubularin-related protein 2	MTMR2		1.1976	0.0582
Q9C040	Tripartite motif-containing protein 2 OS=Homo sapiens OX=9606 GN=TRIM2 PE=1 SV=1	TRIM2	5	1.299	0.5479	Tripartite motif-containing protein 2	TRIM2		1.1971	0.2818
Q92871	Phosphomannomutase 1 OS=Homo sapiens OX=9606 GN=PMM1 PE=1 SV=2	PMM1	7	0.818	0.2725	Phosphomannomutase 1	PMM1	3;1	1.1969	0.1226	Phosphomannomutase 1	PMM1	3	1.1268	0.31797
Q02388						Collagen alpha-1(VII) chain	COL7A1		1.1969	0.3518
Q9GZR7	ATP-dependent RNA helicase DDX24 OS=Homo sapiens OX=9606 GN=DDX24 PE=1 SV=1	DDX24	10	1.007	0.9584	ATP-dependent RNA helicase DDX24	DDX24		1.1966	0.1474
Q4ZIN3	Membralin OS=Homo sapiens OX=9606 GN=TMEM259 PE=1 SV=1	C19orf6; TMEM259	3	1.159	0.6162	Membralin	TMEM259		1.1965	0.247
P51003	Poly(A) polymerase alpha OS=Homo sapiens OX=9606 GN=PAPOLA PE=1 SV=4	PAPOLA	5	0.832	0.3571	Poly(A) polymerase alpha	PAPOLA		1.1965	0.4592
Q9Y2B0	Protein canopy homolog 2 OS=Homo sapiens OX=9606 GN=CNPY2 PE=1 SV=1	CNPY2	8	1.006	0.9812	Protein canopy homolog 2	CNPY2		1.1962	0.407
Q9UL01	Dermatan-sulfate epimerase OS=Homo sapiens OX=9606 GN=DSE PE=1 SV=1	DSE	4	0.987	0.9464	Dermatan-sulfate epimerase	DSE	4	1.1962	0.122	Dermatan-sulfate epimerase	DSE	4	1.14927	0.303468
P49915	GMP synthase [glutamine-hydrolyzing] OS=Homo sapiens OX=9606 GN=GMPS PE=1 SV=1	GMPS	16	1.376	0.04211	GMP synthase [glutamine-hydrolyzing]	GMPS	12;12	1.196	0.0014	GMP synthase [glutamine-hydrolyzing]	GMPS	12	1.23854	0.0224577
Q14690	Protein RRP5 homolog OS=Homo sapiens OX=9606 GN=PDCD11 PE=1 SV=3	PDCD11	20	1.364	0.1392	Protein RRP5 homolog	PDCD11		1.1959	0.0114
Q9UJF2	Ras GTPase-activating protein nGAP OS=Homo sapiens OX=9606 GN=RASAL2 PE=1 SV=2	RASAL2	4	1.325	0.3199	Ras GTPase-activating protein nGAP	RASAL2	4;3;1;1;1;1;1;1;1;1	1.1959	0.1752	Ras GTPase-activating protein nGAP	RASAL2	4	1.30156	0.0121284
O43657	Tetraspanin-6 OS=Homo sapiens OX=9606 GN=TSPAN6 PE=1 SV=1	TSPAN6	1	0.724		Tetraspanin-6	TSPAN6		1.1957	0.68
Q9H910	Jupiter microtubule associated homolog 2 OS=Homo sapiens OX=9606 GN=JPT2 PE=1 SV=1	HN1L; JPT2	4	0.746	0.2152	Jupiter microtubule associated homolog 2	JPT2		1.1955	0.1875
Q5T440	Putative transferase CAF17, mitochondrial OS=Homo sapiens OX=9606 GN=IBA57 PE=1 SV=1	IBA57	2	1.215	0.08268	Putative transferase CAF17, mitochondrial	IBA57		1.1954	0.7036
P20290	Transcription factor BTF3 OS=Homo sapiens OX=9606 GN=BTF3 PE=1 SV=1	BTF3	3	1.06	0.731	Transcription factor BTF3	BTF3	2;2;1;1	1.1953	0.0981	Transcription factor BTF3	BTF3	2	1.19732	0.248828
Q9BV86	N-terminal Xaa-Pro-Lys N-methyltransferase 1 OS=Homo sapiens OX=9606 GN=NTMT1 PE=1 SV=3	NTMT1	4	1.136	0.7282	N-terminal Xaa-Pro-Lys N-methyltransferase 1	NTMT1		1.1952	0.2239
Q6P1N0	Coiled-coil and C2 domain-containing protein 1A OS=Homo sapiens OX=9606 GN=CC2D1A PE=1 SV=1	CC2D1A	10	0.939	0.6871	Coiled-coil and C2 domain-containing protein 1A	CC2D1A	10;9;3;2	1.1951	0.1103	Coiled-coil and C2 domain-containing protein 1A	CC2D1A	10	0.835021	0.0043014
P43490	Nicotinamide phosphoribosyltransferase OS=Homo sapiens OX=9606 GN=NAMPT PE=1 SV=1	NAMPT	22	1.269	0.03962	Nicotinamide phosphoribosyltransferase	NAMPT	9;6	1.195	0.0228	Nicotinamide phosphoribosyltransferase	NAMPT	9	1.09714	0.38777
Q6ZT21						Transmembrane protein with metallophosphoesterase domain	TMPPE		1.1947	0.2989
Q5JTH9	RRP12-like protein OS=Homo sapiens OX=9606 GN=RRP12 PE=1 SV=2	RRP12	12	0.898	0.4902	RRP12-like protein	RRP12	9;9;9	1.1944	0.048	RRP12-like protein	RRP12	9	1.336	0.0182267
Q8N1F7	Nuclear pore complex protein Nup93 OS=Homo sapiens OX=9606 GN=NUP93 PE=1 SV=2	NUP93	18	1.053	0.3172	Nuclear pore complex protein Nup93	NUP93	8;7;7;2;2;2;1;1;1;1;1;1;1	1.1942	0.0491	Nuclear pore complex protein Nup93	NUP93	8	1.21421	0.0676809
O75533	Splicing factor 3B subunit 1 OS=Homo sapiens OX=9606 GN=SF3B1 PE=1 SV=3	SF3B1	31	1.154	0.004662	Splicing factor 3B subunit 1	SF3B1	11;3	1.1939	0.0005	Splicing factor 3B subunit 1	SF3B1	11	1.17892	0.0583815
Q9NR12	PDZ and LIM domain protein 7 OS=Homo sapiens OX=9606 GN=PDLIM7 PE=1 SV=1	PDLIM7	17	1.141	0.01725	PDZ and LIM domain protein 7	PDLIM7	9;8;3;3;3;3;3;3;3;2	1.1936	0.0043	PDZ and LIM domain protein 7	PDLIM7	10	1.30551	0.0881792
O43719	HIV Tat-specific factor 1 OS=Homo sapiens OX=9606 GN=HTATSF1 PE=1 SV=1	HTATSF1	7	1.102	0.8354	HIV Tat-specific factor 1	HTATSF1		1.1933	0.298
Q14847	LIM and SH3 domain protein 1 OS=Homo sapiens OX=9606 GN=LASP1 PE=1 SV=2	LASP1	8	1.026	0.8313	LIM and SH3 domain protein 1	LASP1		1.1932	0.171
O43615	Mitochondrial import inner membrane translocase subunit TIM44 OS=Homo sapiens OX=9606 GN=TIMM44 PE=1 SV=2	TIMM44	12	0.894	0.3011	Mitochondrial import inner membrane translocase subunit TIM44	TIMM44	6;5;2;1;1	1.1931	0.077	Mitochondrial import inner membrane translocase subunit TIM44	TIMM44	6	1.2195	0.167314
Q9NUJ3	T-complex protein 11-like protein 1 OS=Homo sapiens OX=9606 GN=TCP11L1 PE=1 SV=1	TCP11L1	3	1.049	0.8966	T-complex protein 11-like protein 1	TCP11L1		1.1927	0.355
O14967	Calmegin OS=Homo sapiens OX=9606 GN=CLGN PE=1 SV=1	CLGN	1	1.061	0.6445	Calmegin	CLGN		1.1925	0.6563
Q8WUM0	Nuclear pore complex protein Nup133 OS=Homo sapiens OX=9606 GN=NUP133 PE=1 SV=2	NUP133	15	1.278	0.1673	Nuclear pore complex protein Nup133	NUP133	11	1.1924	0.1106	Nuclear pore complex protein Nup133	NUP133	11	1.12857	0.252065
P26006	Integrin alpha-3 OS=Homo sapiens OX=9606 GN=ITGA3 PE=1 SV=5	ITGA3	5	1.057	0.603	Integrin alpha-3	ITGA3	6;6;3	1.1924	0.0703	Integrin alpha-3;Integrin alpha-3 heavy chain;Integrin alpha-3 light chain	ITGA3	6	1.10742	0.321602
O96033						Molybdopterin synthase sulfur carrier subunit	MOCS2		1.1924	0.6298
Q9H0D6	5'-3' exoribonuclease 2 OS=Homo sapiens OX=9606 GN=XRN2 PE=1 SV=1	XRN2	10	1.112	0.2782	5'-3' exoribonuclease 2	XRN2	9;9	1.1922	0.0426	5-3 exoribonuclease 2	XRN2	9	1.20824	0.147587
Q9BUQ8	Probable ATP-dependent RNA helicase DDX23 OS=Homo sapiens OX=9606 GN=DDX23 PE=1 SV=3	DDX23	12	0.949	0.6534	Probable ATP-dependent RNA helicase DDX23	DDX23	12;4;1	1.1917	0.1761	Probable ATP-dependent RNA helicase DDX23	DDX23	12	0.971179	0.294781
P35914	Hydroxymethylglutaryl-CoA lyase, mitochondrial OS=Homo sapiens OX=9606 GN=HMGCL PE=1 SV=2	HMGCL	4	0.926	0.4969	Hydroxymethylglutaryl-CoA lyase, mitochondrial	HMGCL	4;2;2;1	1.1917	0.1637	Hydroxymethylglutaryl-CoA lyase, mitochondrial	HMGCL	4	0.976205	0.771934
P46109	Crk-like protein OS=Homo sapiens OX=9606 GN=CRKL PE=1 SV=1	CRKL	6	1.169	0.05827	Crk-like protein	CRKL	7	1.1916	0.0245	Crk-like protein	CRKL	7	1.16043	0.114759
P08397	Porphobilinogen deaminase OS=Homo sapiens OX=9606 GN=HMBS PE=1 SV=2	HMBS	5	1.303	0.226	Porphobilinogen deaminase	HMBS		1.1915	0.1033
O60888	Protein CutA OS=Homo sapiens OX=9606 GN=CUTA PE=1 SV=2	CUTA	4	0.767	0.04669	Protein CutA	CUTA		1.1912	0.487
O43148	mRNA cap guanine-N7 methyltransferase OS=Homo sapiens OX=9606 GN=RNMT PE=1 SV=1	RNMT	9	1.504	0.03727	mRNA cap guanine-N7 methyltransferase	RNMT	5;5;3;1	1.1911	0.0507	mRNA cap guanine-N7 methyltransferase	RNMT	5	1.11595	0.119613
P39019	40S ribosomal protein S19 OS=Homo sapiens OX=9606 GN=RPS19 PE=1 SV=2	RPS19	6	0.943	0.4927	40S ribosomal protein S19	RPS19	5;3;3;3;3;2	1.19	0.1185	40S ribosomal protein S19	RPS19	5	0.973359	0.802326
O15228	Dihydroxyacetone phosphate acyltransferase OS=Homo sapiens OX=9606 GN=GNPAT PE=1 SV=1	GNPAT	11	0.817	0.1706	Dihydroxyacetone phosphate acyltransferase	GNPAT	8;7;6;2;1	1.19	0.0405	Dihydroxyacetone phosphate acyltransferase	GNPAT	8	1.26186	0.0997067
Q9ULT0	Tetratricopeptide repeat protein 7A OS=Homo sapiens OX=9606 GN=TTC7A PE=1 SV=3	TTC7A	5	1.24	0.2095	Tetratricopeptide repeat protein 7A	TTC7A		1.1898	0.2
P11908	Ribose-phosphate pyrophosphokinase 2 OS=Homo sapiens OX=9606 GN=PRPS2 PE=1 SV=2	PRPS2	10	1.204	0.4168	Ribose-phosphate pyrophosphokinase 2	PRPS2	5;5;3;3	1.1894	0.2014	Ribose-phosphate pyrophosphokinase 2	PRPS2	5	1.06652	0.628118
O75874	Isocitrate dehydrogenase [NADP] cytoplasmic OS=Homo sapiens OX=9606 GN=IDH1 PE=1 SV=2	IDH1	10	0.968	0.6666	Isocitrate dehydrogenase [NADP] cytoplasmic	IDH1	8;3;1;1	1.1894	0.0981	Isocitrate dehydrogenase [NADP] cytoplasmic	IDH1	8	0.981826	0.888544
Q9ULC3	Ras-related protein Rab-23 OS=Homo sapiens OX=9606 GN=RAB23 PE=1 SV=1	RAB23	9	1.265	0.001789	Ras-related protein Rab-23	RAB23	6	1.1886	0.0006	Ras-related protein Rab-23	RAB23	6	1.07852	0.348286
Q13126	S-methyl-5'-thioadenosine phosphorylase OS=Homo sapiens OX=9606 GN=MTAP PE=1 SV=2	MTAP	8	1.237	0.05158	S-methyl-5'-thioadenosine phosphorylase	MTAP	6;6;6;6;5;5;5;5;5;5;2;2	1.1885	0.0563	S-methyl-5-thioadenosine phosphorylase;Purine nucleoside phosphorylase	MTAP	6	1.29555	0.178174
Q9P0V3	SH3 domain-binding protein 4 OS=Homo sapiens OX=9606 GN=SH3BP4 PE=1 SV=1	SH3BP4	10	1.083	0.4555	SH3 domain-binding protein 4	SH3BP4	7;5;2;1	1.1885	0.0182	SH3 domain-binding protein 4	SH3BP4	7	1.06574	0.521789
Q9BSU1						UPF0183 protein C16orf70	C16orf70		1.1885	0.6035
P09871	Complement C1s subcomponent OS=Homo sapiens OX=9606 GN=C1S PE=1 SV=1	C1S	1	1.167	0.2306	Complement C1s subcomponent	C1S		1.1884	0.4744
Q9NZL9	Methionine adenosyltransferase 2 subunit beta OS=Homo sapiens OX=9606 GN=MAT2B PE=1 SV=1	MAT2B	7	1.024	0.8168	Methionine adenosyltransferase 2 subunit beta	MAT2B	8;7;7;7;4;3;2	1.188	0.136	Methionine adenosyltransferase 2 subunit beta	MAT2B	8	1.17525	0.30578
O75643	U5 small nuclear ribonucleoprotein 200 kDa helicase OS=Homo sapiens OX=9606 GN=SNRNP200 PE=1 SV=2	SNRNP200	55	1.441	1.286e-05	U5 small nuclear ribonucleoprotein 200 kDa helicase	SNRNP200	38;25;9	1.1878	0.0032	U5 small nuclear ribonucleoprotein 200 kDa helicase	SNRNP200	43	1.29386	0.0170645
P46060	Ran GTPase-activating protein 1 OS=Homo sapiens OX=9606 GN=RANGAP1 PE=1 SV=1	RANGAP1	16	1.013	0.8407	Ran GTPase-activating protein 1	RANGAP1	8;4;1;1	1.1878	0.0152	Ran GTPase-activating protein 1	RANGAP1	8	1.03515	0.798398
P22626	Heterogeneous nuclear ribonucleoproteins A2/B1 OS=Homo sapiens OX=9606 GN=HNRNPA2B1 PE=1 SV=2	HNRNPA2B1	14	1.137	0.04838	Heterogeneous nuclear ribonucleoproteins A2/B1	HNRNPA2B1	8;7;5	1.1875	0.0928	Heterogeneous nuclear ribonucleoproteins A2/B1	HNRNPA2B1	8	1.16151	0.228355
Q9UK76	Jupiter microtubule associated homolog 1 OS=Homo sapiens OX=9606 GN=JPT1 PE=1 SV=3	HN1; JPT1	2	1.07	0.8585	Jupiter microtubule associated homolog 1	JPT1		1.1875	0.3071
P67809	Y-box-binding protein 1 OS=Homo sapiens OX=9606 GN=YBX1 PE=1 SV=3	YBX1	7	1.007	0.7783	Y-box-binding protein 1	YBX1	4;3;1	1.1873	0.1646	Nuclease-sensitive element-binding protein 1	YBX1	6	0.751823	0.388717
O60749	Sorting nexin-2 OS=Homo sapiens OX=9606 GN=SNX2 PE=1 SV=2	SNX2	16	1.056	0.3877	Sorting nexin-2	SNX2	10;10;2	1.1872	0.0632	Sorting nexin-2	SNX2	10	1.19935	0.171193
P47895						Aldehyde dehydrogenase family 1 member A3	ALDH1A3		1.187	0.5581
Q9UKN8	General transcription factor 3C polypeptide 4 OS=Homo sapiens OX=9606 GN=GTF3C4 PE=1 SV=2	GTF3C4	5	0.842	0.2831	General transcription factor 3C polypeptide 4	GTF3C4		1.1869	0.1627
Q93074						Mediator of RNA polymerase II transcription subunit 12	MED12		1.1868	0.4921
Q96P50						Arf-GAP with coiled-coil, ANK repeat and PH domain-containing protein 3	ACAP3		1.1867	0.366
Q01581						Hydroxymethylglutaryl-CoA synthase, cytoplasmic	HMGCS1		1.1864	0.2654
P56545	C-terminal-binding protein 2 OS=Homo sapiens OX=9606 GN=CTBP2 PE=1 SV=1	CTBP2	6	1.338	0.08134	C-terminal-binding protein 2	CTBP2	2;1;1;1	1.1863	0.2769	C-terminal-binding protein 2	CTBP2	3	1.24684	0.102291
Q9Y2L9	Leucine-rich repeat and calponin homology domain-containing protein 1 OS=Homo sapiens OX=9606 GN=LRCH1 PE=1 SV=3	LRCH1	4	0.906	0.6383	Leucine-rich repeat and calponin homology domain-containing protein 1	LRCH1	7;7;6;1;1;1	1.1863	0.139	Leucine-rich repeat and calponin homology domain-containing protein 1	LRCH1	7	0.888185	0.640215
Q29RF7	Sister chromatid cohesion protein PDS5 homolog A OS=Homo sapiens OX=9606 GN=PDS5A PE=1 SV=1	PDS5A	8	2.363	0.005245	Sister chromatid cohesion protein PDS5 homolog A	PDS5A	4;2;1;1	1.1862	0.2007	Sister chromatid cohesion protein PDS5 homolog A	PDS5A	4	1.29639	0.113361
P52292	Importin subunit alpha-1 OS=Homo sapiens OX=9606 GN=KPNA2 PE=1 SV=1	KPNA2	8	1.108	0.4258	Importin subunit alpha-1	KPNA2	6;3;3	1.1862	0.0188	Importin subunit alpha-1	KPNA2	6	1.38239	0.00567534
O43929						Origin recognition complex subunit 4;(Bos taurus) Origin recognition complex subunit 4	ORC4;SWISS-PROT:Q2YDI2		1.1857	0.7392
Q96S55						ATPase WRNIP1	WRNIP1	3;3;2;2	1.1852	0.5361	ATPase WRNIP1	WRNIP1	3	1.14489	0.205524
O43809	Cleavage and polyadenylation specificity factor subunit 5 OS=Homo sapiens OX=9606 GN=NUDT21 PE=1 SV=1	NUDT21	7	0.948	0.5901	Cleavage and polyadenylation specificity factor subunit 5	NUDT21	4;3;2	1.185	0.3553	Cleavage and polyadenylation specificity factor subunit 5	NUDT21	5	1.14217	0.39565
P31689	DnaJ homolog subfamily A member 1 OS=Homo sapiens OX=9606 GN=DNAJA1 PE=1 SV=2	DNAJA1	9	1.122	0.3402	DnaJ homolog subfamily A member 1	DNAJA1	5;4	1.1846	0.0082	DnaJ homolog subfamily A member 1	DNAJA1	5	1.31398	0.0371035
P51610	Host cell factor 1 OS=Homo sapiens OX=9606 GN=HCFC1 PE=1 SV=2	HCFC1	11	0.928	0.549	Host cell factor 1	HCFC1	13;13;12;12;6;4	1.1845	0.0552	Host cell factor 1;HCF N-terminal chain 1;HCF N-terminal chain 2;HCF N-terminal chain 3;HCF N-terminal chain 4;HCF N-terminal chain 5;HCF N-terminal chain 6;HCF C-terminal chain 1;HCF C-terminal chain 2;HCF C-terminal chain 3;HCF C-terminal chain 4;HCF C-terminal chain 5;HCF C-terminal chain 6	HCFC1	13	1.15703	0.242959
Q13435	Splicing factor 3B subunit 2 OS=Homo sapiens OX=9606 GN=SF3B2 PE=1 SV=2	SF3B2	13	1.169	0.245	Splicing factor 3B subunit 2	SF3B2		1.1844	0.1485
Q8TDQ7	Glucosamine-6-phosphate isomerase 2 OS=Homo sapiens OX=9606 GN=GNPDA2 PE=1 SV=1	GNPDA2	5	1.118	0.7125	Glucosamine-6-phosphate isomerase 2	GNPDA2	3;3;3;2;1	1.1844	0.305	Glucosamine-6-phosphate isomerase 2	GNPDA2	3	1.15539	0.594609
Q6UW63	Protein O-glucosyltransferase 2 OS=Homo sapiens OX=9606 GN=POGLUT2 PE=1 SV=1	KDELC1	11	0.814	0.1983	Protein O-glucosyltransferase 2	POGLUT2	5	1.1843	0.187	KDEL motif-containing protein 1	KDELC1	5	1.06309	0.654314
P57737	Coronin-7 OS=Homo sapiens OX=9606 GN=CORO7 PE=1 SV=2	CORO7	4	0.756	0.3136	Coronin-7	CORO7		1.1842	0.005
O94875	Sorbin and SH3 domain-containing protein 2 OS=Homo sapiens OX=9606 GN=SORBS2 PE=1 SV=3	SORBS2	6	1.169	0.4445	Sorbin and SH3 domain-containing protein 2	SORBS2	7;7;7;7;7;7;6;6;6;6;6;5;3;2;2;1;1;1;1	1.1831	0.0202	Sorbin and SH3 domain-containing protein 2	SORBS2	7	1.19484	0.102483
Q9Y6C2	EMILIN-1 OS=Homo sapiens OX=9606 GN=EMILIN1 PE=1 SV=3	EMILIN1	2	0.819	0.1962	EMILIN-1	EMILIN1		1.1828	0.2915
Q9NVM9						Integrator complex subunit 13	INTS13		1.1825	0.3466
P62826	GTP-binding nuclear protein Ran OS=Homo sapiens OX=9606 GN=RAN PE=1 SV=3	RAN	7	1.099	0.3554	GTP-binding nuclear protein Ran	RAN		1.1824	0.1478
Q96DI7	U5 small nuclear ribonucleoprotein 40 kDa protein OS=Homo sapiens OX=9606 GN=SNRNP40 PE=1 SV=1	SNRNP40	11	1.294	0.08853	U5 small nuclear ribonucleoprotein 40 kDa protein	SNRNP40	5;5;1	1.1822	0.1138	U5 small nuclear ribonucleoprotein 40 kDa protein	SNRNP40	5	1.20271	0.153947
Q9BT40						Inositol polyphosphate 5-phosphatase K	INPP5K		1.1818	0.2143
Q9NRG7						Epimerase family protein SDR39U1	SDR39U1		1.1815	0.3614
Q9BQ67	Glutamate-rich WD repeat-containing protein 1 OS=Homo sapiens OX=9606 GN=GRWD1 PE=1 SV=1	GRWD1	4	1.025	0.8863	Glutamate-rich WD repeat-containing protein 1	GRWD1	4;2	1.1812	0.1108	Glutamate-rich WD repeat-containing protein 1	GRWD1	4	1.09935	0.507035
Q9HC35	Echinoderm microtubule-associated protein-like 4 OS=Homo sapiens OX=9606 GN=EML4 PE=1 SV=3	EML4	9	1.422	0.001328	Echinoderm microtubule-associated protein-like 4	EML4	3;3;2	1.1809	0.2412	Echinoderm microtubule-associated protein-like 4	EML4	3	1.35969	0.376542
Q9H082	Ras-related protein Rab-33B OS=Homo sapiens OX=9606 GN=RAB33B PE=1 SV=1	RAB33B	3	1.173	0.7144	Ras-related protein Rab-33B	RAB33B		1.1801	0.8143
Q15286	Ras-related protein Rab-35 OS=Homo sapiens OX=9606 GN=RAB35 PE=1 SV=1	RAB35	5	1.03	0.6755	Ras-related protein Rab-35	RAB35		1.18	0.4552
Q8WXI9	Transcriptional repressor p66-beta OS=Homo sapiens OX=9606 GN=GATAD2B PE=1 SV=1	GATAD2B	2	1.09		Transcriptional repressor p66-beta	GATAD2B		1.1795	0.0695
O60488	Long-chain-fatty-acid--CoA ligase 4 OS=Homo sapiens OX=9606 GN=ACSL4 PE=1 SV=2	ACSL4	20	0.867	0.08419	Long-chain-fatty-acid--CoA ligase 4	ACSL4	13;13;4;3;1;1;1	1.1795	0.1284	Long-chain-fatty-acid--CoA ligase 4	ACSL4	13	1.05373	0.715951
Q14103	Heterogeneous nuclear ribonucleoprotein D0 OS=Homo sapiens OX=9606 GN=HNRNPD PE=1 SV=1	HNRNPD	7	1.241	0.001921	Heterogeneous nuclear ribonucleoprotein D0	HNRNPD		1.1793	0.0039
Q9UKG1	DCC-interacting protein 13-alpha OS=Homo sapiens OX=9606 GN=APPL1 PE=1 SV=1	APPL1	10	0.985	0.8041	DCC-interacting protein 13-alpha	APPL1	7;1;1	1.1789	0.0841	DCC-interacting protein 13-alpha	APPL1	7	1.36044	0.0858981
Q5PRF9	Protein Smaug homolog 2 OS=Homo sapiens OX=9606 GN=SAMD4B PE=1 SV=1	SAMD4B	2	0.94	0.8366	Protein Smaug homolog 2	SAMD4B		1.1788	0.3389
Q9UNF0	Protein kinase C and casein kinase substrate in neurons protein 2 OS=Homo sapiens OX=9606 GN=PACSIN2 PE=1 SV=2	PACSIN2	7	1.056	0.2975	Protein kinase C and casein kinase substrate in neurons protein 2	PACSIN2		1.1786	0.0954
Q15185	Prostaglandin E synthase 3 OS=Homo sapiens OX=9606 GN=PTGES3 PE=1 SV=1	PTGES3	6	1.049	0.6007	Prostaglandin E synthase 3	PTGES3		1.1786	0.1147
Q9NPF5	DNA methyltransferase 1-associated protein 1 OS=Homo sapiens OX=9606 GN=DMAP1 PE=1 SV=1	DMAP1	1	1.409	0.1138	DNA methyltransferase 1-associated protein 1	DMAP1		1.1785	0.5431
P21589	5'-nucleotidase OS=Homo sapiens OX=9606 GN=NT5E PE=1 SV=1	NT5E	14	0.894	0.01649	5'-nucleotidase	NT5E	11;10;4;4;1	1.1783	0.1222	5-nucleotidase	NT5E	11	1.28357	0.111897
P62269	40S ribosomal protein S18 OS=Homo sapiens OX=9606 GN=RPS18 PE=1 SV=3	RPS18	10	0.986	0.8886	40S ribosomal protein S18	RPS18	3;2;1;1	1.1782	0.0215	40S ribosomal protein S18	RPS18	3	1.23288	0.29421
Q8N3Y1						F-box/WD repeat-containing protein 8	FBXW8		1.178	0.4127
Q12972	Nuclear inhibitor of protein phosphatase 1 OS=Homo sapiens OX=9606 GN=PPP1R8 PE=1 SV=2	PPP1R8	6	1.546	0.1184	Nuclear inhibitor of protein phosphatase 1	PPP1R8	4;2;2;1	1.1779	0.146	Nuclear inhibitor of protein phosphatase 1;Activator of RNA decay	PPP1R8	4	1.13098	0.491875
Q96RN5						Mediator of RNA polymerase II transcription subunit 15	MED15		1.1778	0.4267
P51784	Ubiquitin carboxyl-terminal hydrolase 11 OS=Homo sapiens OX=9606 GN=USP11 PE=1 SV=3	USP11	8	1.137	0.7294	Ubiquitin carboxyl-terminal hydrolase 11	USP11		1.1776	0.0592
P83731	60S ribosomal protein L24 OS=Homo sapiens OX=9606 GN=RPL24 PE=1 SV=1	RPL24	4	1.105	0.1602	60S ribosomal protein L24	RPL24		1.1774	0.2255
Q13563	Polycystin-2 OS=Homo sapiens OX=9606 GN=PKD2 PE=1 SV=3	PKD2	7	0.92	0.3495	Polycystin-2	PKD2	8;8;8;6;6;2	1.1772	0.3584	Polycystin-2	PKD2	9	1.19913	0.341491
Q8IV38						Ankyrin repeat and MYND domain-containing protein 2	ANKMY2		1.1769	0.5894
P21810	Biglycan OS=Homo sapiens OX=9606 GN=BGN PE=1 SV=2	BGN	11	1.125	0.0494	Biglycan	BGN	6;1	1.1767	0.0406	Biglycan	BGN	6	1.2612	0.0676487
P42345	Serine/threonine-protein kinase mTOR OS=Homo sapiens OX=9606 GN=MTOR PE=1 SV=1	MTOR	17	0.994	0.9685	Serine/threonine-protein kinase mTOR	MTOR	10;1	1.1767	0.0177	Serine/threonine-protein kinase mTOR	MTOR	10	1.21729	0.126209
P43487	Ran-specific GTPase-activating protein OS=Homo sapiens OX=9606 GN=RANBP1 PE=1 SV=1	RANBP1	5	1.018	0.8155	Ran-specific GTPase-activating protein	RANBP1		1.1762	0.1724
P61247	40S ribosomal protein S3a OS=Homo sapiens OX=9606 GN=RPS3A PE=1 SV=2	RPS3A	12	0.971	0.8584	40S ribosomal protein S3a	RPS3A		1.176	0.1333
P63279	SUMO-conjugating enzyme UBC9 OS=Homo sapiens OX=9606 GN=UBE2I PE=1 SV=1	UBE2I	5	1.214	0.05795	SUMO-conjugating enzyme UBC9	UBE2I		1.1759	0.0247
Q7L2J0						7SK snRNA methylphosphate capping enzyme	MEPCE		1.1759	0.3531
P51858	Hepatoma-derived growth factor OS=Homo sapiens OX=9606 GN=HDGF PE=1 SV=1	HDGF	10	0.992	0.9529	Hepatoma-derived growth factor	HDGF	4;4;4	1.1754	0.4656	Hepatoma-derived growth factor	HDGF	4	1.03507	0.827186
Q96PE1						Adhesion G protein-coupled receptor A2	ADGRA2	2;1;1;1	1.1754	0.0986	G-protein coupled receptor 124	GPR124;ADGRA2	2	1.30427	0.241915
Q13263	Transcription intermediary factor 1-beta OS=Homo sapiens OX=9606 GN=TRIM28 PE=1 SV=5	TRIM28	14	1.197	0.1171	Transcription intermediary factor 1-beta	TRIM28	9;9;6;2;2	1.1752	0.1136	Transcription intermediary factor 1-beta	TRIM28	9	1.34989	0.0856733
Q9GZN8	UPF0687 protein C20orf27 OS=Homo sapiens OX=9606 GN=C20orf27 PE=1 SV=3	C20orf27	2	0.883	0.6658	UPF0687 protein C20orf27	C20orf27	2;2	1.175	0.2417	UPF0687 protein C20orf27	C20orf27	2	0.96546	0.649449
Q92791	Endoplasmic reticulum protein SC65 OS=Homo sapiens OX=9606 GN=P3H4 PE=1 SV=1	LEPREL4; P3H4	11	1.12	0.3378	Endoplasmic reticulum protein SC65	P3H4	5;4	1.1749	0.0829	Synaptonemal complex protein SC65	LEPREL4;P3H4	5	1.27897	0.128611
P45880	Voltage-dependent anion-selective channel protein 2 OS=Homo sapiens OX=9606 GN=VDAC2 PE=1 SV=2	VDAC2	10	1.113	0.1675	Voltage-dependent anion-selective channel protein 2	VDAC2		1.1749	0.1763
Q8WUD6	Cholinephosphotransferase 1 OS=Homo sapiens OX=9606 GN=CHPT1 PE=1 SV=1	CHPT1	1	0.893	0.7748	Cholinephosphotransferase 1	CHPT1		1.1747	0.6102
Q04206	Transcription factor p65 OS=Homo sapiens OX=9606 GN=RELA PE=1 SV=2	RELA	9	1.133	0.268	Transcription factor p65	RELA	7;6;6;6;6;5;5;4;4;3;3;1;1;1;1	1.1745	0.0356	Transcription factor p65	RELA	7	1.18854	0.128918
Q05086	Ubiquitin-protein ligase E3A OS=Homo sapiens OX=9606 GN=UBE3A PE=1 SV=4	UBE3A	11	1.014	0.9182	Ubiquitin-protein ligase E3A	UBE3A		1.1745	0.206
O43252	Bifunctional 3'-phosphoadenosine 5'-phosphosulfate synthase 1 OS=Homo sapiens OX=9606 GN=PAPSS1 PE=1 SV=2	PAPSS1	10	1.255	0.09457	Bifunctional 3'-phosphoadenosine 5'-phosphosulfate synthase 1	PAPSS1	7	1.1744	0.0439	Bifunctional 3-phosphoadenosine 5-phosphosulfate synthase 1;Sulfate adenylyltransferase;Adenylyl-sulfate kinase	PAPSS1	7	1.05148	0.685784
Q8TEQ6	Gem-associated protein 5 OS=Homo sapiens OX=9606 GN=GEMIN5 PE=1 SV=3	GEMIN5	9	1.009	0.981	Gem-associated protein 5	GEMIN5	5	1.1736	0.0982	Gem-associated protein 5	GEMIN5	5	1.09466	0.38902
P50454	Serpin H1 OS=Homo sapiens OX=9606 GN=SERPINH1 PE=1 SV=2	SERPINH1	21	1.127	0.1343	Serpin H1	SERPINH1	21;16;15;11;11;10;10;8;8;8;7;3;2	1.1735	0.1465	Serpin H1	SERPINH1	22	1.16359	0.229408
Q9UI10	Translation initiation factor eIF-2B subunit delta OS=Homo sapiens OX=9606 GN=EIF2B4 PE=1 SV=2	EIF2B4	7	1.227	0.5259	Translation initiation factor eIF-2B subunit delta	EIF2B4		1.173	0.023
P26440	Isovaleryl-CoA dehydrogenase, mitochondrial OS=Homo sapiens OX=9606 GN=IVD PE=1 SV=2		5	0.839	0.5483	Isovaleryl-CoA dehydrogenase, mitochondrial	IVD		1.1726	0.1928
P52888	Thimet oligopeptidase OS=Homo sapiens OX=9606 GN=THOP1 PE=1 SV=2	THOP1	9	0.889	0.7233	Thimet oligopeptidase	THOP1	5;3;2;1;1;1;1;1	1.1724	0.0523	Thimet oligopeptidase	THOP1	5	1.07681	0.561701
Q93009	Ubiquitin carboxyl-terminal hydrolase 7 OS=Homo sapiens OX=9606 GN=USP7 PE=1 SV=2	USP7	24	1.155	0.151	Ubiquitin carboxyl-terminal hydrolase 7	USP7	15;15;11;5;1;1;1;1	1.1722	0.0113	Ubiquitin carboxyl-terminal hydrolase 7;Ubiquitin carboxyl-terminal hydrolase	USP7	15	1.1628	0.231262
Q8TEQ8						GPI ethanolamine phosphate transferase 3	PIGO	4;4	1.1722	0.4715	GPI ethanolamine phosphate transferase 3	PIGO	4	1.78569	0.124125
P13807	Glycogen [starch] synthase, muscle OS=Homo sapiens OX=9606 GN=GYS1 PE=1 SV=2	GYS1	18	1.137	0.03989	Glycogen [starch] synthase, muscle	GYS1	15;14;2	1.1719	0.0468	Glycogen [starch] synthase, muscle	GYS1	16	1.17016	0.279046
Q96PU8	Protein quaking OS=Homo sapiens OX=9606 GN=QKI PE=1 SV=1	QKI	6	1.087	0.1766	Protein quaking	QKI	5;5;5;5;5;5;3;3;3;2;2;2;1	1.1716	0.0171	Protein quaking	QKI	5	1.20626	0.136587
P18077	60S ribosomal protein L35a OS=Homo sapiens OX=9606 GN=RPL35A PE=1 SV=2	RPL35A	4	0.919	0.5148	60S ribosomal protein L35a	RPL35A		1.1714	0.5227
Q6NYC1	Bifunctional arginine demethylase and lysyl-hydroxylase JMJD6 OS=Homo sapiens OX=9606 GN=JMJD6 PE=1 SV=1	JMJD6	4	1.634	0.0283	Bifunctional arginine demethylase and lysyl-hydroxylase JMJD6	JMJD6		1.1712	0.3512
Q9BRT3	Migration and invasion enhancer 1 OS=Homo sapiens OX=9606 GN=MIEN1 PE=1 SV=1	MIEN1	2	1.039	0.5849	Migration and invasion enhancer 1	MIEN1		1.171	0.6782
Q5VT25	Serine/threonine-protein kinase MRCK alpha OS=Homo sapiens OX=9606 GN=CDC42BPA PE=1 SV=1	CDC42BPA	15	1.465	0.1513	Serine/threonine-protein kinase MRCK alpha	CDC42BPA		1.1709	0.046
Q562R1	Beta-actin-like protein 2 OS=Homo sapiens OX=9606 GN=ACTBL2 PE=1 SV=2	ACTBL2	14	0.974	0.6654	Beta-actin-like protein 2	ACTBL2	9	1.1709	0.2878	Beta-actin-like protein 2	ACTBL2	9	2.8379	0.044939
O00214						Galectin-8	LGALS8		1.1709	0.4969
Q96BJ3	Axin interactor, dorsalization-associated protein OS=Homo sapiens OX=9606 GN=AIDA PE=1 SV=1	AIDA	7	0.982	0.766	Axin interactor, dorsalization-associated protein	AIDA	3;2;1	1.1708	0.0331	Axin interactor, dorsalization-associated protein	AIDA	3	1.23991	0.0359318
Q14728	Major facilitator superfamily domain-containing protein 10 OS=Homo sapiens OX=9606 GN=MFSD10 PE=1 SV=1	MFSD10	5	1.036	0.4335	Major facilitator superfamily domain-containing protein 10	MFSD10		1.1704	0.1399
Q96RS6	NudC domain-containing protein 1 OS=Homo sapiens OX=9606 GN=NUDCD1 PE=1 SV=2	NUDCD1	7	1.025	0.942	NudC domain-containing protein 1	NUDCD1		1.1703	0.2953
Q9NUQ7	Ufm1-specific protease 2 OS=Homo sapiens OX=9606 GN=UFSP2 PE=1 SV=3	UFSP2	9	1.013	0.8274	Ufm1-specific protease 2	UFSP2	6;5;4;2;2;2;1	1.1701	0.1919	Ufm1-specific protease 2	UFSP2	6	1.03595	0.564873
Q6ZNE5						Beclin 1-associated autophagy-related key regulator	ATG14		1.1701	0.4053
Q12800	Alpha-globin transcription factor CP2 OS=Homo sapiens OX=9606 GN=TFCP2 PE=1 SV=2	TFCP2	4	1.308	0.1149	Alpha-globin transcription factor CP2	TFCP2	5;5;5;5;3;3	1.17	0.3529	Alpha-globin transcription factor CP2	TFCP2	5	1.50606	0.106347
Q15437	Protein transport protein Sec23B OS=Homo sapiens OX=9606 GN=SEC23B PE=1 SV=2	SEC23B	6	0.855	0.1577	Protein transport protein Sec23B	SEC23B		1.17	0.1116
Q96EY1	DnaJ homolog subfamily A member 3, mitochondrial OS=Homo sapiens OX=9606 GN=DNAJA3 PE=1 SV=2	DNAJA3	6	1.131	0.11	DnaJ homolog subfamily A member 3, mitochondrial	DNAJA3	4;4;1;1	1.1696	0.0515	DnaJ homolog subfamily A member 3, mitochondrial	DNAJA3	4	1.10366	0.372661
Q8IXT5	RNA-binding protein 12B OS=Homo sapiens OX=9606 GN=RBM12B PE=1 SV=2	RBM12B	6	1.268	0.2952	RNA-binding protein 12B	RBM12B	7;6;1;1;1;1	1.1694	0.204	RNA-binding protein 12B	RBM12B	7	1.06819	0.554799
P23246	Splicing factor, proline- and glutamine-rich OS=Homo sapiens OX=9606 GN=SFPQ PE=1 SV=2	SFPQ	14	1.06	0.6796	Splicing factor, proline- and glutamine-rich	SFPQ	5;5;1	1.1694	0.1738	Splicing factor, proline- and glutamine-rich	SFPQ	7	1.20084	0.0469266
Q9Y2X3	Nucleolar protein 58 OS=Homo sapiens OX=9606 GN=NOP58 PE=1 SV=1	NOP58	14	0.979	0.7958	Nucleolar protein 58	NOP58	9;4;1	1.1689	0.0462	Nucleolar protein 58	NOP58	9	1.1032	0.359701
Q0VGL1						Ragulator complex protein LAMTOR4	LAMTOR4		1.1689	0.3456
P62424	60S ribosomal protein L7a OS=Homo sapiens OX=9606 GN=RPL7A PE=1 SV=2	RPL7A	13	1.245	0.2121	60S ribosomal protein L7a	RPL7A	8;6;4	1.1684	0.2034	60S ribosomal protein L7a	RPL7A	8	1.29154	0.244366
P07741	Adenine phosphoribosyltransferase OS=Homo sapiens OX=9606 GN=APRT PE=1 SV=2	APRT	7	1.117	0.3414	Adenine phosphoribosyltransferase	APRT	5;4;4;4;3;2	1.1681	0.2144	Adenine phosphoribosyltransferase	APRT	5	1.17127	0.135014
O15439						Multidrug resistance-associated protein 4	ABCC4	9;9;6;5;4	1.168	0.0569	Multidrug resistance-associated protein 4	ABCC4	9	1.22078	0.121302
Q13428	Treacle protein OS=Homo sapiens OX=9606 GN=TCOF1 PE=1 SV=3	TCOF1	3	1.19	0.591	Treacle protein	TCOF1		1.1676	0.4381
Q9Y4W6	AFG3-like protein 2 OS=Homo sapiens OX=9606 GN=AFG3L2 PE=1 SV=2	AFG3L2	10	0.741	0.124	AFG3-like protein 2	AFG3L2	5;1;1	1.1676	0.3056	AFG3-like protein 2	AFG3L2	6	1.13966	0.399995
P42126	Enoyl-CoA delta isomerase 1, mitochondrial OS=Homo sapiens OX=9606 GN=ECI1 PE=1 SV=1	ECI1	1	0.811	0.05126	Enoyl-CoA delta isomerase 1, mitochondrial	ECI1		1.1675	0.4445
P31948	Stress-induced-phosphoprotein 1 OS=Homo sapiens OX=9606 GN=STIP1 PE=1 SV=1	STIP1	14	1.046	0.3376	Stress-induced-phosphoprotein 1	STIP1	9;9;8;4;3;3	1.167	0.1347	Stress-induced-phosphoprotein 1	STIP1	9	1.12749	0.434948
Q96CW5	Gamma-tubulin complex component 3 OS=Homo sapiens OX=9606 GN=TUBGCP3 PE=1 SV=2	TUBGCP3	4	0.878	0.3683	Gamma-tubulin complex component 3	TUBGCP3		1.1667	0.3635
P35658	Nuclear pore complex protein Nup214 OS=Homo sapiens OX=9606 GN=NUP214 PE=1 SV=2	NUP214	15	1.058	0.4872	Nuclear pore complex protein Nup214	NUP214		1.1658	0.0533
Q8IZ52	Chondroitin sulfate synthase 2 OS=Homo sapiens OX=9606 GN=CHPF PE=1 SV=2	CHPF	7	0.944	0.788	Chondroitin sulfate synthase 2	CHPF	5;5;4	1.1657	0.0822	Chondroitin sulfate synthase 2	CHPF	5	1.23855	0.178807
P53396	ATP-citrate synthase OS=Homo sapiens OX=9606 GN=ACLY PE=1 SV=3	ACLY	35	1.16	0.005676	ATP-citrate synthase	ACLY	24;24;20;3;1	1.1649	0.061	ATP-citrate synthase	ACLY	25	1.20878	0.0940189
P52298	Nuclear cap-binding protein subunit 2 OS=Homo sapiens OX=9606 GN=NCBP2 PE=1 SV=1	NCBP2	2	0.947	0.6634	Nuclear cap-binding protein subunit 2	NCBP2		1.1649	0.5099
Q12888	TP53-binding protein 1 OS=Homo sapiens OX=9606 GN=TP53BP1 PE=1 SV=2	TP53BP1	24	1.042	0.6441	TP53-binding protein 1	TP53BP1		1.1641	0.0444
Q9H0B6	Kinesin light chain 2 OS=Homo sapiens OX=9606 GN=KLC2 PE=1 SV=1	KLC2	15	0.779	0.4597	Kinesin light chain 2	KLC2	6;6;4;4;2;2;2;2	1.164	0.3673	Kinesin light chain 2	KLC2	6	1.10458	0.518601
Q9H9G7	Protein argonaute-3 OS=Homo sapiens OX=9606 GN=AGO3 PE=1 SV=2	AGO3; EIF2C3	4	1.138	0.7318	Protein argonaute-3	AGO3		1.1635	0.2357
P27708	CAD protein OS=Homo sapiens OX=9606 GN=CAD PE=1 SV=3	CAD	36	1.209	0.0008606	CAD protein	CAD	21;21;3	1.1634	0.0075	CAD protein;Glutamine-dependent carbamoyl-phosphate synthase;Aspartate carbamoyltransferase;Dihydroorotase	CAD	23	1.14512	0.152076
Q96Q11	CCA tRNA nucleotidyltransferase 1, mitochondrial OS=Homo sapiens OX=9606 GN=TRNT1 PE=1 SV=2	TRNT1	5	1.499	0.4441	CCA tRNA nucleotidyltransferase 1, mitochondrial	TRNT1	4;4;2;2;2;1;1;1;1;1;1;1	1.1631	0.17	CCA tRNA nucleotidyltransferase 1, mitochondrial	TRNT1	4	1.23484	0.164735
Q86WG5						Myotubularin-related protein 13	SBF2		1.1629	0.205
Q96GQ7	Probable ATP-dependent RNA helicase DDX27 OS=Homo sapiens OX=9606 GN=DDX27 PE=1 SV=2	DDX27	9	1.119	0.09005	Probable ATP-dependent RNA helicase DDX27	DDX27		1.1627	0.0454
Q9P016						Thymocyte nuclear protein 1	THYN1		1.1626	0.201
Q96SU4	Oxysterol-binding protein-related protein 9 OS=Homo sapiens OX=9606 GN=OSBPL9 PE=1 SV=2	OSBPL9	5	0.93	0.6558	Oxysterol-binding protein-related protein 9	OSBPL9		1.1622	0.031
Q16851	UTP--glucose-1-phosphate uridylyltransferase OS=Homo sapiens OX=9606 GN=UGP2 PE=1 SV=5	UGP2	18	1.032	0.303	UTP--glucose-1-phosphate uridylyltransferase	UGP2		1.1621	0.0126
Q13325	Interferon-induced protein with tetratricopeptide repeats 5 OS=Homo sapiens OX=9606 GN=IFIT5 PE=1 SV=1	IFIT5	5	0.971	0.6602	Interferon-induced protein with tetratricopeptide repeats 5	IFIT5	6;5	1.1621	0.0705	Interferon-induced protein with tetratricopeptide repeats 5	IFIT5	6	1.23967	0.253506
P61978	Heterogeneous nuclear ribonucleoprotein K OS=Homo sapiens OX=9606 GN=HNRNPK PE=1 SV=1	HNRNPK	17	1.182	0.002032	Heterogeneous nuclear ribonucleoprotein K	HNRNPK	10;9;9;7;3	1.1617	0.0045	Heterogeneous nuclear ribonucleoprotein K	HNRNPK	10	1.24443	0.100602
Q8WZA0	Protein LZIC OS=Homo sapiens OX=9606 GN=LZIC PE=1 SV=1	LZIC	3	0.92	0.7238	Protein LZIC	LZIC		1.1616	0.1944
O95881	Thioredoxin domain-containing protein 12 OS=Homo sapiens OX=9606 GN=TXNDC12 PE=1 SV=1	TXNDC12	4	1.267	0.1216	Thioredoxin domain-containing protein 12	TXNDC12	3	1.1614	0.0932	Thioredoxin domain-containing protein 12	TXNDC12	3	1.28994	0.139284
Q6PJT7	Zinc finger CCCH domain-containing protein 14 OS=Homo sapiens OX=9606 GN=ZC3H14 PE=1 SV=1	ZC3H14	4	0.882	0.7436	Zinc finger CCCH domain-containing protein 14	ZC3H14	2;2;2;2;2;2;2;2;1;1;1;1;1;1;1;1;1;0;0	1.161	0.4794	Zinc finger CCCH domain-containing protein 14	ZC3H14	3	1.07196	0.767336
P43243	Matrin-3 OS=Homo sapiens OX=9606 GN=MATR3 PE=1 SV=2	MATR3	21	1.128	0.03148	Matrin-3	MATR3	14;14;14;12;8;8;8;6;4;2;2;2;1;1;1;1;1;1;1;1;1	1.1609	0.0045	Matrin-3	MATR3	14	1.33609	0.0678837
O15305	Phosphomannomutase 2 OS=Homo sapiens OX=9606 GN=PMM2 PE=1 SV=1	PMM2	8	0.856	0.2497	Phosphomannomutase 2	PMM2		1.1609	0.3288
Q6NTF9						Rhomboid domain-containing protein 2	RHBDD2		1.1609	0.1839
Q9GZT3	SRA stem-loop-interacting RNA-binding protein, mitochondrial OS=Homo sapiens OX=9606 GN=SLIRP PE=1 SV=1	SLIRP	3	0.761	0.0421	SRA stem-loop-interacting RNA-binding protein, mitochondrial	SLIRP		1.1607	0.1326
Q9NPA8						Transcription and mRNA export factor ENY2	ENY2		1.1606	0.2656
Q13838	Spliceosome RNA helicase DDX39B OS=Homo sapiens OX=9606 GN=DDX39B PE=1 SV=1	DDX39B	17	1.124	0.006883	Spliceosome RNA helicase DDX39B	DDX39B	13;13;12;10;9;7;6;6;6;6;5;4;4;4;4;3;3;3;3;3;3;2;2;1;1;1;1;1;1;1	1.1605	0.0421	Spliceosome RNA helicase DDX39B	DDX39B	13	1.20314	0.118778
Q14185	Dedicator of cytokinesis protein 1 OS=Homo sapiens OX=9606 GN=DOCK1 PE=1 SV=2	DOCK1	7	2.191	0.2266	Dedicator of cytokinesis protein 1	DOCK1		1.1599	0.1394
O43556						Epsilon-sarcoglycan	SGCE		1.1599	0.2769
P42166	Lamina-associated polypeptide 2, isoform alpha OS=Homo sapiens OX=9606 GN=TMPO PE=1 SV=2	TMPO	14	1.141	0.1019	Lamina-associated polypeptide 2, isoform alpha	TMPO	12	1.1596	0.0354	Lamina-associated polypeptide 2, isoform alpha;Thymopoietin;Thymopentin	TMPO	12	0.994656	0.907952
P52306	Rap1 GTPase-GDP dissociation stimulator 1 OS=Homo sapiens OX=9606 GN=RAP1GDS1 PE=1 SV=3	RAP1GDS1	18	1.129	0.1096	Rap1 GTPase-GDP dissociation stimulator 1	RAP1GDS1	10;10;10;9;9;9;3;3;3;2;2;2	1.1595	0.1359	Rap1 GTPase-GDP dissociation stimulator 1	RAP1GDS1	10	1.21981	0.110269
Q96QC0						Serine/threonine-protein phosphatase 1 regulatory subunit 10	PPP1R10	1	1.1595	0.2744	Serine/threonine-protein phosphatase 1 regulatory subunit 10	PPP1R10	7	1.17278	0.483336
P62750	60S ribosomal protein L23a OS=Homo sapiens OX=9606 GN=RPL23A PE=1 SV=1	RPL23A	6	1.095	0.2549	60S ribosomal protein L23a	RPL23A		1.1594	0.1523
O43390	Heterogeneous nuclear ribonucleoprotein R OS=Homo sapiens OX=9606 GN=HNRNPR PE=1 SV=1	HNRNPR	20	1.085	0.1624	Heterogeneous nuclear ribonucleoprotein R	HNRNPR	18;17;16;14;13;3	1.1593	0.0191	Heterogeneous nuclear ribonucleoprotein R	HNRNPR	18	1.26481	0.0647759
Q9C0J8	pre-mRNA 3' end processing protein WDR33 OS=Homo sapiens OX=9606 GN=WDR33 PE=1 SV=2	WDR33	1	1.348	0.1172	pre-mRNA 3' end processing protein WDR33	WDR33		1.1591	0.1041
P48426	Phosphatidylinositol 5-phosphate 4-kinase type-2 alpha OS=Homo sapiens OX=9606 GN=PIP4K2A PE=1 SV=2	PIP4K2A	4	1.33	0.009276	Phosphatidylinositol 5-phosphate 4-kinase type-2 alpha	PIP4K2A	3;3;2;1	1.1591	0.1375	Phosphatidylinositol 5-phosphate 4-kinase type-2 alpha	PIP4K2A	3	1.20742	0.210544
P60660	Myosin light polypeptide 6 OS=Homo sapiens OX=9606 GN=MYL6 PE=1 SV=2	MYL6	9	1.176	0.03661	Myosin light polypeptide 6	MYL6		1.1591	0.0641
Q9H019						Mitochondrial fission regulator 1-like	MTFR1L		1.1591	0.3544
Q2TAA5	GDP-Man:Man(3)GlcNAc(2)-PP-Dol alpha-1,2-mannosyltransferase OS=Homo sapiens OX=9606 GN=ALG11 PE=1 SV=2	ALG11	4	1.32	0.4585	GDP-Man:Man(3)GlcNAc(2)-PP-Dol alpha-1,2-mannosyltransferase	ALG11	4;1	1.1587	0.2262	GDP-Man:Man(3)GlcNAc(2)-PP-Dol alpha-1,2-mannosyltransferase	ALG11	4	0.930244	0.640661
Q12884	Prolyl endopeptidase FAP OS=Homo sapiens OX=9606 GN=FAP PE=1 SV=5	FAP	20	1.139	0.03935	Prolyl endopeptidase FAP	FAP		1.1584	0.0279
P83436	Conserved oligomeric Golgi complex subunit 7 OS=Homo sapiens OX=9606 GN=COG7 PE=1 SV=1	COG7	7	0.378	0.01286	Conserved oligomeric Golgi complex subunit 7	COG7		1.1584	0.5901
Q5T4B2	Inactive glycosyltransferase 25 family member 3 OS=Homo sapiens OX=9606 GN=CERCAM PE=1 SV=1	CERCAM	9	0.947	0.927	Inactive glycosyltransferase 25 family member 3	CERCAM	5;4;4	1.1578	0.4871	Probable inactive glycosyltransferase 25 family member 3	CERCAM	5	0.874909	0.356289
Q5UCC4	ER membrane protein complex subunit 10 OS=Homo sapiens OX=9606 GN=EMC10 PE=1 SV=1	EMC10	2	0.938	0.8474	ER membrane protein complex subunit 10	EMC10		1.1578	0.602
Q9BXP5	Serrate RNA effector molecule homolog OS=Homo sapiens OX=9606 GN=SRRT PE=1 SV=1	SRRT	13	1.07	0.009611	Serrate RNA effector molecule homolog	SRRT	6;6;6;6;5;3;1;1;1	1.1572	0.1766	Serrate RNA effector molecule homolog	SRRT	6	1.25052	0.032884
Q9NRN7	L-aminoadipate-semialdehyde dehydrogenase-phosphopantetheinyl transferase OS=Homo sapiens OX=9606 GN=AASDHPPT PE=1 SV=2	AASDHPPT	1	1.095	0.679	L-aminoadipate-semialdehyde dehydrogenase-phosphopantetheinyl transferase	AASDHPPT		1.1565	0.1878
P41567	Eukaryotic translation initiation factor 1 OS=Homo sapiens OX=9606 GN=EIF1 PE=1 SV=1	EIF1	5	1.016	0.9507	Eukaryotic translation initiation factor 1	EIF1		1.1562	0.0741
P55212						Caspase-6	CASP6		1.1562	0.4471
Q9HB40	Retinoid-inducible serine carboxypeptidase OS=Homo sapiens OX=9606 GN=SCPEP1 PE=1 SV=1	SCPEP1	2	1.407	0.1192	Retinoid-inducible serine carboxypeptidase	SCPEP1		1.1559	0.7371
Q5SSJ5	Heterochromatin protein 1-binding protein 3 OS=Homo sapiens OX=9606 GN=HP1BP3 PE=1 SV=1	HP1BP3	9	1.137	0.3438	Heterochromatin protein 1-binding protein 3	HP1BP3	7;6;6;5;5;5;1;1;1	1.1558	0.0732	Heterochromatin protein 1-binding protein 3	HP1BP3	7	1.28843	0.0500966
O95427						GPI ethanolamine phosphate transferase 1	PIGN		1.1558	0.2576
P78527	DNA-dependent protein kinase catalytic subunit OS=Homo sapiens OX=9606 GN=PRKDC PE=1 SV=3	PRKDC	112	1.143	0.0651	DNA-dependent protein kinase catalytic subunit	PRKDC	72;70;3;1	1.1556	0.0396	DNA-dependent protein kinase catalytic subunit	PRKDC	72	1.19482	0.0975339
Q8ND56	Protein LSM14 homolog A OS=Homo sapiens OX=9606 GN=LSM14A PE=1 SV=3	LSM14A	4	1.585	0.1031	Protein LSM14 homolog A	LSM14A		1.1553	0.3821
P55011	Solute carrier family 12 member 2 OS=Homo sapiens OX=9606 GN=SLC12A2 PE=1 SV=1	SLC12A2	6	1.143	0.4082	Solute carrier family 12 member 2	SLC12A2	3;3;2	1.1552	0.2861	Solute carrier family 12 member 2	SLC12A2	3	1.24932	0.240813
P49916	DNA ligase 3 OS=Homo sapiens OX=9606 GN=LIG3 PE=1 SV=2	LIG3	7	1.047	0.704	DNA ligase 3	LIG3	9;9;7;7;3;3;1	1.1548	0.0382	DNA ligase 3	LIG3	9	1.11619	0.41875
Q9HAN9	Nicotinamide/nicotinic acid mononucleotide adenylyltransferase 1 OS=Homo sapiens OX=9606 GN=NMNAT1 PE=1 SV=1	NMNAT1	4	1.036	0.8128	Nicotinamide/nicotinic acid mononucleotide adenylyltransferase 1	NMNAT1	3;1	1.1548	0.12	Nicotinamide/nicotinic acid mononucleotide adenylyltransferase 1	NMNAT1	3	1.13108	0.521092
P61960	Ubiquitin-fold modifier 1 OS=Homo sapiens OX=9606 GN=UFM1 PE=1 SV=1	UFM1	4	0.922	0.4614	Ubiquitin-fold modifier 1	UFM1		1.1547	0.2125
Q99615	DnaJ homolog subfamily C member 7 OS=Homo sapiens OX=9606 GN=DNAJC7 PE=1 SV=2	DNAJC7	8	0.878	0.4885	DnaJ homolog subfamily C member 7	DNAJC7	5;5;3;3;2;2	1.1547	0.0827	DnaJ homolog subfamily C member 7	DNAJC7	5	1.15973	0.174041
P02545	Prelamin-A/C OS=Homo sapiens OX=9606 GN=LMNA PE=1 SV=1	LMNA	50	1.051	0.3616	Prelamin-A/C	LMNA	33;32;31;27;27;11;7	1.1541	0.0951	Prelamin-A/C;Lamin-A/C	LMNA	33	1.01432	0.830278
Q9BUE0						Mediator of RNA polymerase II transcription subunit 18	MED18		1.1541	0.6254
Q9HBF4						Zinc finger FYVE domain-containing protein 1	ZFYVE1		1.1539	0.4493
Q92544	Transmembrane 9 superfamily member 4 OS=Homo sapiens OX=9606 GN=TM9SF4 PE=1 SV=2	TM9SF4	8	0.873	0.2223	Transmembrane 9 superfamily member 4	TM9SF4		1.1538	0.1349
P16220						Cyclic AMP-responsive element-binding protein 1	CREB1		1.1537	0.636
Q9BRG1	Vacuolar protein-sorting-associated protein 25 OS=Homo sapiens OX=9606 GN=VPS25 PE=1 SV=1	VPS25	5	1.134	0.3666	Vacuolar protein-sorting-associated protein 25	VPS25	4;3;3;1	1.1535	0.2468	Vacuolar protein-sorting-associated protein 25	VPS25	4	1.02185	0.82991
Q9NQG5	Regulation of nuclear pre-mRNA domain-containing protein 1B OS=Homo sapiens OX=9606 GN=RPRD1B PE=1 SV=1	RPRD1B	6	1.295	0.004366	Regulation of nuclear pre-mRNA domain-containing protein 1B	RPRD1B	6;3;1	1.1534	0.1558	Regulation of nuclear pre-mRNA domain-containing protein 1B	RPRD1B	6	1.23924	0.193345
O14950	Myosin regulatory light chain 12B OS=Homo sapiens OX=9606 GN=MYL12B PE=1 SV=2	MYL12B; MYL12A	10	1.12	0.112	Myosin regulatory light chain 12B;Myosin regulatory light chain 12A	MYL12B;MYL12A		1.1533	0.2642
Q02543	60S ribosomal protein L18a OS=Homo sapiens OX=9606 GN=RPL18A PE=1 SV=2	RPL18A	8	1.048	0.7115	60S ribosomal protein L18a	RPL18A		1.1532	0.3345
Q9UBV7	Beta-1,4-galactosyltransferase 7 OS=Homo sapiens OX=9606 GN=B4GALT7 PE=1 SV=1	B4GALT7	3	0.789	0.09347	Beta-1,4-galactosyltransferase 7	B4GALT7	2;2;1	1.1532	0.4274	Beta-1,4-galactosyltransferase 7;Xylosylprotein 4-beta-galactosyltransferase	B4GALT7	2	0.90097	0.315877
P29401	Transketolase OS=Homo sapiens OX=9606 GN=TKT PE=1 SV=3	TKT	19	1.061	0.2897	Transketolase	TKT		1.1527	0.0098
Q96AE4	Far upstream element-binding protein 1 OS=Homo sapiens OX=9606 GN=FUBP1 PE=1 SV=3	FUBP1	15	1.195	0.01171	Far upstream element-binding protein 1	FUBP1		1.1524	0.1875
O96005	Cleft lip and palate transmembrane protein 1 OS=Homo sapiens OX=9606 GN=CLPTM1 PE=1 SV=1	CLPTM1	13	0.663	0.0006559	Cleft lip and palate transmembrane protein 1	CLPTM1	6;4;4;3	1.1523	0.3858	Cleft lip and palate transmembrane protein 1	CLPTM1	6	0.942294	0.677615
Q9H0X9	Oxysterol-binding protein-related protein 5 OS=Homo sapiens OX=9606 GN=OSBPL5 PE=1 SV=1	OSBPL5	12	1.027	0.8288	Oxysterol-binding protein-related protein 5	OSBPL5	9;9;8;4;3;1;1;1;1;1;1	1.1522	0.1675	Oxysterol-binding protein-related protein 5	OSBPL5	9	1.02643	0.795968
Q9UHY7	Enolase-phosphatase E1 OS=Homo sapiens OX=9606 GN=ENOPH1 PE=1 SV=1	ENOPH1	4	0.785	0.2592	Enolase-phosphatase E1	ENOPH1	4;2;2;1	1.1521	0.3436	Enolase-phosphatase E1	ENOPH1	4	1.14152	0.318323
O00443	Phosphatidylinositol 4-phosphate 3-kinase C2 domain-containing subunit alpha OS=Homo sapiens OX=9606 GN=PIK3C2A PE=1 SV=2	PIK3C2A	7	0.955	0.7239	Phosphatidylinositol 4-phosphate 3-kinase C2 domain-containing subunit alpha	PIK3C2A	5;2;2	1.1519	0.3163	Phosphatidylinositol 4-phosphate 3-kinase C2 domain-containing subunit alpha	PIK3C2A	5	1.02257	0.891244
Q9UBT2	SUMO-activating enzyme subunit 2 OS=Homo sapiens OX=9606 GN=UBA2 PE=1 SV=2	UBA2	14	1.06	0.2183	SUMO-activating enzyme subunit 2	UBA2	8;6;4;3;1;1;1	1.1513	0.0158	SUMO-activating enzyme subunit 2	UBA2	8	1.1258	0.29676
Q9NR30	Nucleolar RNA helicase 2 OS=Homo sapiens OX=9606 GN=DDX21 PE=1 SV=5	DDX21	23	1.144	0.01858	Nucleolar RNA helicase 2	DDX21	15;14	1.151	0.0254	Nucleolar RNA helicase 2	DDX21	15	1.20442	0.0415006
Q9BYT8	Neurolysin, mitochondrial OS=Homo sapiens OX=9606 GN=NLN PE=1 SV=1	NLN	15	0.939	0.5002	Neurolysin, mitochondrial	NLN	9;8;4;2	1.151	0.0512	Neurolysin, mitochondrial	NLN	9	1.042	0.556653
Q13164	Mitogen-activated protein kinase 7 OS=Homo sapiens OX=9606 GN=MAPK7 PE=1 SV=2	MAPK7	5	1.401	0.1527	Mitogen-activated protein kinase 7	MAPK7		1.1509	0.474
P38571	Lysosomal acid lipase/cholesteryl ester hydrolase OS=Homo sapiens OX=9606 GN=LIPA PE=1 SV=2	LIPA	1	1.08	0.5163	Lysosomal acid lipase/cholesteryl ester hydrolase	LIPA		1.1508	0.5934
Q96T37	RNA-binding protein 15 OS=Homo sapiens OX=9606 GN=RBM15 PE=1 SV=2	RBM15	6	0.984	0.975	RNA-binding protein 15	RBM15		1.1507	0.0367
Q86XP3	ATP-dependent RNA helicase DDX42 OS=Homo sapiens OX=9606 GN=DDX42 PE=1 SV=1	DDX42	15	1.159	0.06184	ATP-dependent RNA helicase DDX42	DDX42	16;15;13;1;1;1	1.1506	0.0088	ATP-dependent RNA helicase DDX42	DDX42	16	1.21976	0.0718612
Q96GA7	Serine dehydratase-like OS=Homo sapiens OX=9606 GN=SDSL PE=1 SV=1	SDSL	3	1.019	0.9598	Serine dehydratase-like	SDSL		1.1506	0.5249
Q9H845	Complex I assembly factor ACAD9, mitochondrial OS=Homo sapiens OX=9606 GN=ACAD9 PE=1 SV=1	ACAD9	12	0.978	0.8124	Complex I assembly factor ACAD9, mitochondrial	ACAD9	8;5	1.1506	0.1807	Acyl-CoA dehydrogenase family member 9, mitochondrial	ACAD9	8	1.08186	0.454452
Q13443	Disintegrin and metalloproteinase domain-containing protein 9 OS=Homo sapiens OX=9606 GN=ADAM9 PE=1 SV=1	ADAM9	4	2.808	0.001293	Disintegrin and metalloproteinase domain-containing protein 9	ADAM9		1.1504	0.297
O94906	Pre-mRNA-processing factor 6 OS=Homo sapiens OX=9606 GN=PRPF6 PE=1 SV=1	PRPF6	15	0.937	0.5665	Pre-mRNA-processing factor 6	PRPF6	12;12	1.1503	0.0384	Pre-mRNA-processing factor 6	PRPF6	12	1.14008	0.0610176
P10155	60 kDa SS-A/Ro ribonucleoprotein OS=Homo sapiens OX=9606 GN=RO60 PE=1 SV=2	TROVE2	11	0.963	0.7359	60 kDa SS-A/Ro ribonucleoprotein	RO60	7;6;6;6;2;1	1.1502	0.1128	60 kDa SS-A/Ro ribonucleoprotein	TROVE2	7	1.16681	0.247988
Q9UBU8						Mortality factor 4-like protein 1	MORF4L1		1.1501	0.2226
P48556	26S proteasome non-ATPase regulatory subunit 8 OS=Homo sapiens OX=9606 GN=PSMD8 PE=1 SV=2	PSMD8	8	0.817	0.2973	26S proteasome non-ATPase regulatory subunit 8	PSMD8		1.1496	0.2303
P50281	Matrix metalloproteinase-14 OS=Homo sapiens OX=9606 GN=MMP14 PE=1 SV=3	MMP14	8	1.03	0.6598	Matrix metalloproteinase-14	MMP14	5;2	1.1495	0.1	Matrix metalloproteinase-14	MMP14	5	1.10709	0.215554
P57740	Nuclear pore complex protein Nup107 OS=Homo sapiens OX=9606 GN=NUP107 PE=1 SV=1	NUP107	11	0.899	0.4595	Nuclear pore complex protein Nup107	NUP107	8;6;6;2;1	1.1491	0.0026	Nuclear pore complex protein Nup107	NUP107	10	1.11608	0.322768
O75351	Vacuolar protein sorting-associated protein 4B OS=Homo sapiens OX=9606 GN=VPS4B PE=1 SV=2	VPS4B	10	1.019	0.692	Vacuolar protein sorting-associated protein 4B	VPS4B	8	1.1487	0.1428	Vacuolar protein sorting-associated protein 4B	VPS4B	8	1.17565	0.281175
Q53S08	Ras-related protein Rab-6D OS=Homo sapiens OX=9606 GN=RAB6D PE=2 SV=1	WTH3DI; RAB6D	2	0.907	0.8297	Ras-related protein Rab-6D;Ras-related protein Rab-6C	RAB6D;RAB6C		1.1487	0.1398
O75494	Serine/arginine-rich splicing factor 10 OS=Homo sapiens OX=9606 GN=SRSF10 PE=1 SV=1	SRSF10; LOC100996657	4	1.099	0.124	Serine/arginine-rich splicing factor 10	SRSF10		1.1485	0.1085
P35222	Catenin beta-1 OS=Homo sapiens OX=9606 GN=CTNNB1 PE=1 SV=1	CTNNB1	25	1.073	0.2018	Catenin beta-1	CTNNB1	14;14;14;14;14;14;14;14;14;13;9;4;2;2;1;1;1;1	1.1484	0.093	Catenin beta-1	CTNNB1	14	1.17849	0.061448
P26022	Pentraxin-related protein PTX3 OS=Homo sapiens OX=9606 GN=PTX3 PE=1 SV=3	PTX3	3	1.038	0.8755	Pentraxin-related protein PTX3	PTX3	3	1.1481	0.114	Pentraxin-related protein PTX3	PTX3	3	1.09769	0.445473
Q9BV68						E3 ubiquitin-protein ligase RNF126	RNF126	2;2;1	1.1479	0.5144	E3 ubiquitin-protein ligase RNF126	RNF126	2	0.943787	0.618372
Q9Y3E5	Peptidyl-tRNA hydrolase 2, mitochondrial OS=Homo sapiens OX=9606 GN=PTRH2 PE=1 SV=1	PTRH2	2	1.056	0.6643	Peptidyl-tRNA hydrolase 2, mitochondrial	PTRH2		1.1478	0.2927
Q92747	Actin-related protein 2/3 complex subunit 1A OS=Homo sapiens OX=9606 GN=ARPC1A PE=1 SV=2	ARPC1A	12	1.1	0.1822	Actin-related protein 2/3 complex subunit 1A	ARPC1A	6;3	1.1475	0.2277	Actin-related protein 2/3 complex subunit 1A	ARPC1A	6	1.30487	0.212417
Q9H1B7						Probable E3 ubiquitin-protein ligase IRF2BPL	IRF2BPL		1.1473	0.4298
Q14204	Cytoplasmic dynein 1 heavy chain 1 OS=Homo sapiens OX=9606 GN=DYNC1H1 PE=1 SV=5	DYNC1H1	159	1.143	0.01428	Cytoplasmic dynein 1 heavy chain 1	DYNC1H1	95;39;31;29;25;25;9;8;2	1.1472	0.0007	Cytoplasmic dynein 1 heavy chain 1	DYNC1H1	96	1.18939	0.0907114
Q14554	Protein disulfide-isomerase A5 OS=Homo sapiens OX=9606 GN=PDIA5 PE=1 SV=1	PDIA5	15	1.088	0.1968	Protein disulfide-isomerase A5	PDIA5	9;5;2;1	1.1471	0.0765	Protein disulfide-isomerase A5	PDIA5	9	1.13956	0.208254
Q5BJF2	Sigma intracellular receptor 2 OS=Homo sapiens OX=9606 GN=TMEM97 PE=1 SV=1	TMEM97	1	1.454	0.1819	Sigma intracellular receptor 2	TMEM97		1.1468	0.4666
P37268	Squalene synthase OS=Homo sapiens OX=9606 GN=FDFT1 PE=1 SV=1	FDFT1	1	0.698		Squalene synthase	FDFT1		1.1468	0.4076
Q9NWT1	p21-activated protein kinase-interacting protein 1 OS=Homo sapiens OX=9606 GN=PAK1IP1 PE=1 SV=2	PAK1IP1	1	1.103	0.3216	p21-activated protein kinase-interacting protein 1	PAK1IP1	5	1.1465	0.3122	p21-activated protein kinase-interacting protein 1	PAK1IP1	5	0.981239	0.874601
Q14249						Endonuclease G, mitochondrial	ENDOG		1.1463	0.4018
Q9BVG4	Protein PBDC1 OS=Homo sapiens OX=9606 GN=PBDC1 PE=1 SV=1	CXorf26; PBDC1	7	0.793	0.01515	Protein PBDC1	PBDC1	5;3	1.1462	0.2309	Protein PBDC1	PBDC1	5	1.36522	0.0670179
P02786	Transferrin receptor protein 1 OS=Homo sapiens OX=9606 GN=TFRC PE=1 SV=2	TFRC	23	1.133	0.1379	Transferrin receptor protein 1	TFRC	19;18;3;1	1.146	0.0572	Transferrin receptor protein 1;Transferrin receptor protein 1, serum form	TFRC	19	1.22537	0.0829469
Q9H9Y6	DNA-directed RNA polymerase I subunit RPA2 OS=Homo sapiens OX=9606 GN=POLR1B PE=1 SV=2	POLR1B	4	1.058	0.836	DNA-directed RNA polymerase I subunit RPA2	POLR1B		1.146	0.1766
Q8WU90	Zinc finger CCCH domain-containing protein 15 OS=Homo sapiens OX=9606 GN=ZC3H15 PE=1 SV=1	ZC3H15	7	0.995	0.9768	Zinc finger CCCH domain-containing protein 15	ZC3H15	5;3;1	1.1459	0.1131	Zinc finger CCCH domain-containing protein 15	ZC3H15	5	1.08818	0.202031
P49903	Selenide, water dikinase 1 OS=Homo sapiens OX=9606 GN=SEPHS1 PE=1 SV=2	SEPHS1	3	1.275	0.01377	Selenide, water dikinase 1	SEPHS1		1.1458	0.0588
P09496	Clathrin light chain A OS=Homo sapiens OX=9606 GN=CLTA PE=1 SV=1	CLTA	4	0.875	0.3694	Clathrin light chain A	CLTA		1.1456	0.7305
Q9ULZ3	Apoptosis-associated speck-like protein containing a CARD OS=Homo sapiens OX=9606 GN=PYCARD PE=1 SV=2	PYCARD	4	1.156	0.6427	Apoptosis-associated speck-like protein containing a CARD	PYCARD	3;3;3;1	1.1455	0.5093	Apoptosis-associated speck-like protein containing a CARD	PYCARD	3	1.43048	0.0338074
Q9Y673	Dolichyl-phosphate beta-glucosyltransferase OS=Homo sapiens OX=9606 GN=ALG5 PE=1 SV=1	ALG5	3	0.939	0.4342	Dolichyl-phosphate beta-glucosyltransferase	ALG5	3;2	1.1455	0.1688	Dolichyl-phosphate beta-glucosyltransferase	ALG5	3	1.0259	0.782669
Q9BYI3	Hyccin OS=Homo sapiens OX=9606 GN=FAM126A PE=1 SV=2	FAM126A	5	1.66	0.002596	Hyccin	FAM126A	6;5;4;3	1.1453	0.0704	Hyccin	FAM126A	6	1.16529	0.203935
Q6P2E9	Enhancer of mRNA-decapping protein 4 OS=Homo sapiens OX=9606 GN=EDC4 PE=1 SV=1	EDC4	14	0.938	0.3402	Enhancer of mRNA-decapping protein 4	EDC4	8;7;1	1.145	0.001	Enhancer of mRNA-decapping protein 4	EDC4	11	1.09842	0.356129
Q71RC2	La-related protein 4 OS=Homo sapiens OX=9606 GN=LARP4 PE=1 SV=3	LARP4	4	1.08	0.3753	La-related protein 4	LARP4	3;3;3;3;3;2;2;2;2;2;1;1;1	1.1442	0.15	La-related protein 4	LARP4	3	1.1315	0.222662
Q00839	Heterogeneous nuclear ribonucleoprotein U OS=Homo sapiens OX=9606 GN=HNRNPU PE=1 SV=6	HNRNPU	18	1.102	0.1878	Heterogeneous nuclear ribonucleoprotein U	HNRNPU	11;10;10;10;9;9;8;8;8;8;7;7;5;1	1.1441	0.0025	Heterogeneous nuclear ribonucleoprotein U	HNRNPU	11	1.15538	0.246562
Q8IVL6	Prolyl 3-hydroxylase 3 OS=Homo sapiens OX=9606 GN=P3H3 PE=1 SV=1	LEPREL2; P3H3	12	1.152	0.1703	Prolyl 3-hydroxylase 3	P3H3	8;7	1.144	0.1175	Prolyl 3-hydroxylase 3	LEPREL2	9	1.28737	0.146355
Q8N6H7	ADP-ribosylation factor GTPase-activating protein 2 OS=Homo sapiens OX=9606 GN=ARFGAP2 PE=1 SV=1	ARFGAP2	6	1.04	0.6967	ADP-ribosylation factor GTPase-activating protein 2	ARFGAP2	4;4;4;4;3;2;2;2;2;2;2;2;2;2;1;1;1;1	1.1438	0.2025	ADP-ribosylation factor GTPase-activating protein 2	ARFGAP2	4	1.27601	0.277143
Q9H792	Inactive tyrosine-protein kinase PEAK1 OS=Homo sapiens OX=9606 GN=PEAK1 PE=1 SV=4	PEAK1	14	0.901	0.4999	Inactive tyrosine-protein kinase PEAK1	PEAK1	10;4;3	1.1437	0.2867	Pseudopodium-enriched atypical kinase 1	PEAK1	11	1.25387	0.0435863
Q53HC9	EARP and GARP complex-interacting protein 1 OS=Homo sapiens OX=9606 GN=EIPR1 PE=1 SV=2	TSSC1; EIPR1	4	0.838	0.4781	EARP and GARP complex-interacting protein 1	EIPR1		1.1431	0.302
Q15645	Pachytene checkpoint protein 2 homolog OS=Homo sapiens OX=9606 GN=TRIP13 PE=1 SV=2	TRIP13	7	1.358	0.1211	Pachytene checkpoint protein 2 homolog	TRIP13	6;2;1	1.143	0.3564	Pachytene checkpoint protein 2 homolog	TRIP13	6	1.13411	0.401095
Q9NQP4	Prefoldin subunit 4 OS=Homo sapiens OX=9606 GN=PFDN4 PE=1 SV=1	PFDN4	2	1.039	0.7824	Prefoldin subunit 4	PFDN4		1.1425	0.1698
Q9H2H8	Peptidyl-prolyl cis-trans isomerase-like 3 OS=Homo sapiens OX=9606 GN=PPIL3 PE=1 SV=1	PPIL3	1	1.014		Peptidyl-prolyl cis-trans isomerase-like 3	PPIL3		1.1423	0.4872
Q9ULI3	Protein HEG homolog 1 OS=Homo sapiens OX=9606 GN=HEG1 PE=1 SV=3	HEG1	1	0.995	0.9838	Protein HEG homolog 1	HEG1		1.1423	0.5521
Q8IX01	SURP and G-patch domain-containing protein 2 OS=Homo sapiens OX=9606 GN=SUGP2 PE=1 SV=2	SUGP2	6	0.853	0.2474	SURP and G-patch domain-containing protein 2	SUGP2		1.1423	0.0751
P49327	Fatty acid synthase OS=Homo sapiens OX=9606 GN=FASN PE=1 SV=3	FASN	69	1.108	0.08824	Fatty acid synthase	FASN	41;40;1;1	1.1422	0.0491	Fatty acid synthase;[Acyl-carrier-protein] S-acetyltransferase;[Acyl-carrier-protein] S-malonyltransferase;3-oxoacyl-[acyl-carrier-protein] synthase;3-oxoacyl-[acyl-carrier-protein] reductase;3-hydroxyacyl-[acyl-carrier-protein] dehydratase;Enoyl-[acyl-carrier-protein] reductase;Oleoyl-[acyl-carrier-protein] hydrolase	FASN	41	1.22376	0.0822311
Q96S97	Myeloid-associated differentiation marker OS=Homo sapiens OX=9606 GN=MYADM PE=1 SV=2	MYADM	4	1.279	0.0385	Myeloid-associated differentiation marker	MYADM	2;1;1;1;1;1	1.1417	0.3993	Myeloid-associated differentiation marker	MYADM	2	1.15561	0.569062
Q969H8	Myeloid-derived growth factor OS=Homo sapiens OX=9606 GN=MYDGF PE=1 SV=1	C19orf10; MYDGF	3	0.827	0.1931	Myeloid-derived growth factor	MYDGF		1.1415	0.5191
Q16822	Phosphoenolpyruvate carboxykinase [GTP], mitochondrial OS=Homo sapiens OX=9606 GN=PCK2 PE=1 SV=4		22	1.192	0.001653	Phosphoenolpyruvate carboxykinase [GTP], mitochondrial	PCK2	16;15;14;8;6;6;3;2;2;2;1;1	1.1414	0.0245	Phosphoenolpyruvate carboxykinase [GTP], mitochondrial	PCK2	16	1.22904	0.111096
P30530	Tyrosine-protein kinase receptor UFO OS=Homo sapiens OX=9606 GN=AXL PE=1 SV=4		2	0.815	0.09863	Tyrosine-protein kinase receptor UFO	AXL	3;3;2;1;1;1;1	1.1414	0.128	Tyrosine-protein kinase receptor UFO;Receptor protein-tyrosine kinase	AXL	3	0.999943	0.99962
P78318	Immunoglobulin-binding protein 1 OS=Homo sapiens OX=9606 GN=IGBP1 PE=1 SV=1	IGBP1	5	1.233	0.151	Immunoglobulin-binding protein 1	IGBP1	3	1.141	0.1487	Immunoglobulin-binding protein 1	IGBP1	3	1.30709	0.228414
Q96ME1						F-box/LRR-repeat protein 18	FBXL18	4;3;3;3;2	1.141	0.3883	F-box/LRR-repeat protein 18	FBXL18	4	0.693719	0.368953
P19971	Thymidine phosphorylase OS=Homo sapiens OX=9606 GN=TYMP PE=1 SV=2	TYMP; SCO2	4	0.376	0.1139	Thymidine phosphorylase	TYMP		1.1409	0.4165
Q9BUN8	Derlin-1 OS=Homo sapiens OX=9606 GN=DERL1 PE=1 SV=1	DERL1	1	1.076	0.5204	Derlin-1	DERL1		1.1408	0.5361
O14964	Hepatocyte growth factor-regulated tyrosine kinase substrate OS=Homo sapiens OX=9606 GN=HGS PE=1 SV=1	HGS	7	0.945	0.4286	Hepatocyte growth factor-regulated tyrosine kinase substrate	HGS	4;4;3	1.1408	0.6277	Hepatocyte growth factor-regulated tyrosine kinase substrate	HGS	4	1.03447	0.866545
Q13426	DNA repair protein XRCC4 OS=Homo sapiens OX=9606 GN=XRCC4 PE=1 SV=2	XRCC4	1	0.828	0.6056	DNA repair protein XRCC4	XRCC4		1.1407	0.2537
Q08209	Serine/threonine-protein phosphatase 2B catalytic subunit alpha isoform OS=Homo sapiens OX=9606 GN=PPP3CA PE=1 SV=1	PPP3CA	9	0.818	0.1715	Serine/threonine-protein phosphatase 2B catalytic subunit alpha isoform	PPP3CA		1.1406	0.1496
Q9NVX2	Notchless protein homolog 1 OS=Homo sapiens OX=9606 GN=NLE1 PE=1 SV=4	NLE1	4	0.826	0.7235	Notchless protein homolog 1	NLE1		1.1405	0.2778
Q9Y3P9	Rab GTPase-activating protein 1 OS=Homo sapiens OX=9606 GN=RABGAP1 PE=1 SV=3	RABGAP1	3	1.004	0.9917	Rab GTPase-activating protein 1	RABGAP1		1.1403	0.4159
Q13363	C-terminal-binding protein 1 OS=Homo sapiens OX=9606 GN=CTBP1 PE=1 SV=2	CTBP1	6	1.035	0.6874	C-terminal-binding protein 1	CTBP1	4;4;3;2;2;2;2;1;1	1.1401	0.1029	C-terminal-binding protein 1	CTBP1	5	1.24475	0.0393141
Q5TA45						Integrator complex subunit 11	INTS11		1.1401	0.2859
Q16576	Histone-binding protein RBBP7 OS=Homo sapiens OX=9606 GN=RBBP7 PE=1 SV=1	RBBP7	9	1.074	0.5588	Histone-binding protein RBBP7	RBBP7	7;7;6;3;3;2;1	1.1398	0.3023	Histone-binding protein RBBP7	RBBP7	7	1.2844	0.255078
O43765	Small glutamine-rich tetratricopeptide repeat-containing protein alpha OS=Homo sapiens OX=9606 GN=SGTA PE=1 SV=1	SGTA	5	0.919	0.7589	Small glutamine-rich tetratricopeptide repeat-containing protein alpha	SGTA		1.1398	0.2821
P35580	Myosin-10 OS=Homo sapiens OX=9606 GN=MYH10 PE=1 SV=3	MYH10	75	1.155	0.002666	Myosin-10	MYH10	48;48;48;48;48;7	1.1397	0.0074	Myosin-10	MYH10	49	1.18918	0.103244
P20839						Inosine-5'-monophosphate dehydrogenase 1	IMPDH1		1.1396	0.4243
Q14558	Phosphoribosyl pyrophosphate synthase-associated protein 1 OS=Homo sapiens OX=9606 GN=PRPSAP1 PE=1 SV=2	PRPSAP1	6	1.148	0.1261	Phosphoribosyl pyrophosphate synthase-associated protein 1	PRPSAP1	7;6;5;4;3;2;2;1	1.1395	0.1765	Phosphoribosyl pyrophosphate synthase-associated protein 1	PRPSAP1	7	1.19517	0.280706
Q9UL26	Ras-related protein Rab-22A OS=Homo sapiens OX=9606 GN=RAB22A PE=1 SV=2	RAB22A	8	1.084	0.2281	Ras-related protein Rab-22A	RAB22A	6	1.1394	0.4892	Ras-related protein Rab-22A	RAB22A	6	1.17439	0.20219
Q9BQA1	Methylosome protein 50 OS=Homo sapiens OX=9606 GN=WDR77 PE=1 SV=1	WDR77	6	1.049	0.6744	Methylosome protein 50	WDR77	5;3;3	1.1394	0.0353	Methylosome protein 50	WDR77	5	1.01175	0.899534
Q8NEJ9						Neuroguidin	NGDN		1.1394	0.1805
Q15459	Splicing factor 3A subunit 1 OS=Homo sapiens OX=9606 GN=SF3A1 PE=1 SV=1	SF3A1	15	1.1	0.4342	Splicing factor 3A subunit 1	SF3A1	11;9;2;2;1	1.1393	0.1071	Splicing factor 3A subunit 1	SF3A1	13	1.26272	0.155602
Q99598	Translin-associated protein X OS=Homo sapiens OX=9606 GN=TSNAX PE=1 SV=1	TSNAX	5	0.905	0.7214	Translin-associated protein X	TSNAX		1.1392	0.4527
Q96AG3	Solute carrier family 25 member 46 OS=Homo sapiens OX=9606 GN=SLC25A46 PE=1 SV=1	SLC25A46	2	0.79	0.1377	Solute carrier family 25 member 46	SLC25A46		1.1392	0.5256
O15254	Peroxisomal acyl-coenzyme A oxidase 3 OS=Homo sapiens OX=9606 GN=ACOX3 PE=1 SV=2	ACOX3	7	1.051	0.7377	Peroxisomal acyl-coenzyme A oxidase 3	ACOX3	8;6;1	1.1391	0.136	Peroxisomal acyl-coenzyme A oxidase 3	ACOX3	8	1.26328	0.0891759
P37837	Transaldolase OS=Homo sapiens OX=9606 GN=TALDO1 PE=1 SV=2	TALDO1	13	0.997	0.9518	Transaldolase	TALDO1		1.139	0.2328
P31749	RAC-alpha serine/threonine-protein kinase OS=Homo sapiens OX=9606 GN=AKT1 PE=1 SV=2	AKT1	9	0.725	0.04237	RAC-alpha serine/threonine-protein kinase	AKT1	6;6;3;2;2;1;1;1;1;1;1;1;1;1;1;1;1;1;1;1	1.1389	0.0227	RAC-alpha serine/threonine-protein kinase	AKT1	6	1.17782	0.136965
Q96GD0						Pyridoxal phosphate phosphatase	PDXP		1.1388	0.0564
O95476						CTD nuclear envelope phosphatase 1	CTDNEP1		1.1387	0.0858
Q16563	Synaptophysin-like protein 1 OS=Homo sapiens OX=9606 GN=SYPL1 PE=1 SV=1	SYPL1	3	1.222	0.5283	Synaptophysin-like protein 1	SYPL1		1.1386	0.391
Q9UBR5	Chemokine-like factor OS=Homo sapiens OX=9606 GN=CKLF PE=1 SV=1	CKLF	1	0.786	0.1674	Chemokine-like factor	CKLF		1.1383	0.6962
P43007	Neutral amino acid transporter A OS=Homo sapiens OX=9606 GN=SLC1A4 PE=1 SV=1	SLC1A4	5	0.908	0.4639	Neutral amino acid transporter A	SLC1A4	6;1	1.1374	0.0126	Neutral amino acid transporter A	SLC1A4	6	1.18143	0.201222
O00487	26S proteasome non-ATPase regulatory subunit 14 OS=Homo sapiens OX=9606 GN=PSMD14 PE=1 SV=1	PSMD14	5	1.163	0.06816	26S proteasome non-ATPase regulatory subunit 14	PSMD14		1.1369	0.4098
P61224	Ras-related protein Rap-1b OS=Homo sapiens OX=9606 GN=RAP1B PE=1 SV=1	RAP1B	8	1.151	0.03497	Ras-related protein Rap-1b	RAP1B	7;7;6;6;6;5;5;5;5;5;4;4;4;4;4;4;3;3;3;3;3;2	1.1368	0.1459	Ras-related protein Rap-1b;Ras-related protein Rap-1b-like protein	RAP1B	7	1.05331	0.482537
O95155	Ubiquitin conjugation factor E4 B OS=Homo sapiens OX=9606 GN=UBE4B PE=1 SV=1	UBE4B	11	0.867	0.533	Ubiquitin conjugation factor E4 B	UBE4B	8;8;8;7;2;1	1.1368	0.1432	Ubiquitin conjugation factor E4 B	UBE4B	8	1.00604	0.951461
P63313						Thymosin beta-10	TMSB10		1.1364	0.6282
O43684	Mitotic checkpoint protein BUB3 OS=Homo sapiens OX=9606 GN=BUB3 PE=1 SV=1	BUB3	9	1.145	0.1655	Mitotic checkpoint protein BUB3	BUB3		1.1363	0.2119
O75368	SH3 domain-binding glutamic acid-rich-like protein OS=Homo sapiens OX=9606 GN=SH3BGRL PE=1 SV=1	SH3BGRL	6	0.922	0.506	SH3 domain-binding glutamic acid-rich-like protein	SH3BGRL	3	1.1361	0.2691	SH3 domain-binding glutamic acid-rich-like protein	SH3BGRL	3	1.03176	0.866366
Q96S66	Chloride channel CLIC-like protein 1 OS=Homo sapiens OX=9606 GN=CLCC1 PE=1 SV=1	CLCC1	8	0.879	0.3916	Chloride channel CLIC-like protein 1	CLCC1		1.1361	0.7557
O96008	Mitochondrial import receptor subunit TOM40 homolog OS=Homo sapiens OX=9606 GN=TOMM40 PE=1 SV=1	TOMM40	9	1.045	0.7234	Mitochondrial import receptor subunit TOM40 homolog	TOMM40	3;1;1;1	1.1358	0.0879	Mitochondrial import receptor subunit TOM40 homolog	TOMM40	3	1.11676	0.294469
Q86YP4						Transcriptional repressor p66-alpha	GATAD2A		1.1356	0.2989
O75691	Small subunit processome component 20 homolog OS=Homo sapiens OX=9606 GN=UTP20 PE=1 SV=3	UTP20	3	0.762	0.4273	Small subunit processome component 20 homolog	UTP20	6	1.1354	0.4702	Small subunit processome component 20 homolog	UTP20	7	1.28315	0.302864
Q92945	Far upstream element-binding protein 2 OS=Homo sapiens OX=9606 GN=KHSRP PE=1 SV=4	KHSRP	16	1.101	0.1769	Far upstream element-binding protein 2	KHSRP		1.1353	0.1576
Q15393	Splicing factor 3B subunit 3 OS=Homo sapiens OX=9606 GN=SF3B3 PE=1 SV=4	SF3B3	27	1.206	0.00932	Splicing factor 3B subunit 3	SF3B3	19;9;5;2;2;1	1.1351	0.0283	Splicing factor 3B subunit 3	SF3B3	19	1.19874	0.154256
Q9Y3Y2						Chromatin target of PRMT1 protein	CHTOP		1.1349	0.6705
Q9HAV7	GrpE protein homolog 1, mitochondrial OS=Homo sapiens OX=9606 GN=GRPEL1 PE=1 SV=2	GRPEL1	4	1.03	0.7408	GrpE protein homolog 1, mitochondrial	GRPEL1	3	1.1342	0.2712	GrpE protein homolog 1, mitochondrial	GRPEL1	3	1.11563	0.463623
P62241	40S ribosomal protein S8 OS=Homo sapiens OX=9606 GN=RPS8 PE=1 SV=2	RPS8	11	1.153	0.2213	40S ribosomal protein S8	RPS8	7;6	1.1338	0.227	40S ribosomal protein S8	RPS8	7	1.32451	0.238196
Q99700	Ataxin-2 OS=Homo sapiens OX=9606 GN=ATXN2 PE=1 SV=2	ATXN2	9	1.002	0.9817	Ataxin-2	ATXN2		1.1338	0.1989
Q92879	CUGBP Elav-like family member 1 OS=Homo sapiens OX=9606 GN=CELF1 PE=1 SV=2	CELF1	2	0.916	0.5639	CUGBP Elav-like family member 1	CELF1		1.1338	0.3721
Q96H20	Vacuolar-sorting protein SNF8 OS=Homo sapiens OX=9606 GN=SNF8 PE=1 SV=1	SNF8	1	0.985	0.9087	Vacuolar-sorting protein SNF8	SNF8		1.1336	0.4693
Q14814						Myocyte-specific enhancer factor 2D	MEF2D		1.1334	0.7022
Q96II8	DISP complex protein LRCH3 OS=Homo sapiens OX=9606 GN=LRCH3 PE=1 SV=2	LRCH3	7	0.945	0.7929	DISP complex protein LRCH3	LRCH3	4;4;4;3;3;2	1.1333	0.3176	Leucine-rich repeat and calponin homology domain-containing protein 3	LRCH3	4	0.988948	0.945877
Q04837	Single-stranded DNA-binding protein, mitochondrial OS=Homo sapiens OX=9606 GN=SSBP1 PE=1 SV=1	SSBP1	4	0.921	0.161	Single-stranded DNA-binding protein, mitochondrial	SSBP1	3;2;2;2;1	1.1327	0.4498	Single-stranded DNA-binding protein, mitochondrial	SSBP1	3	0.983248	0.900075
[truncated: 5,145 more rows]

## Sheet: Table S2_Merged Metabolites
						RP Aqueous Positive					RP Organic Positive					HILIC Aqueous Positive					HILIC Aqueous Negative					HILIC Organic Positive					HILIC Organic Negative
Name	Formula	Molecular Weight	KEGG ID	HMDB ID	Note	RT [min]	Ratio: (disease) / (control)	Log2 Fold Change: (disease) / (control)	P-value: (disease) / (control)	Adj. P-value: (disease) / (control)	RT [min]	Ratio: (Disease) / (Control)	Log2 Fold Change: (Disease) / (Control)	P-value: (Disease) / (Control)	Adj. P-value: (Disease) / (Control)	RT [min]	Ratio: (Disease) / (Control)	Log2 Fold Change: (Disease) / (Control)	P-value: (Disease) / (Control)	Adj. P-value: (Disease) / (Control)	RT [min]	Ratio: (Disease) / (Control)	Log2 Fold Change: (Disease) / (Control)	P-value: (Disease) / (Control)	Adj. P-value: (Disease) / (Control)	RT [min]	Ratio: (Disease) / (Control)	Log2 Fold Change: (Disease) / (Control)	P-value: (Disease) / (Control)	Adj. P-value: (Disease) / (Control)	RT [min]	Ratio: (Disease) / (Control)	Log2 Fold Change: (Disease) / (Control)	P-value: (Disease) / (Control)	Adj. P-value: (Disease) / (Control)
CDP-ethanolamine	C11 H20 N4 O11 P2	446.06	C00570	HMDB0001564		1.013	0.214	-2.22	0.00121882	0.0776188						6.764	0.649	-0.62	0.00173961	0.11098
Adenine	C5 H5 N5	118.028	C00147	HMDB00034		4.491	0.675	-0.57	0.393169	0.743411	0.982	0.803	-0.32	0.0353162	0.833929	2.577	0.673	-0.57	0.380472	0.725534	2.62	0.332	-1.59	0.0569235	0.584465						2.873	3.649	1.87	0.0250154	0.770816
Betaine	C5 H11 N O2	117.079	C00719	HMDB00043		0.92	1.5	0.58	0.004435	0.128484						6.626	0.825	-0.28	0.677165	0.869134
Adenosine monophosphate	C10 H14 N5 O7 P	347.064	C00020	HMDB00045																	6.766	0.44	-1.19	0.0274021	0.509665
Adenosine	C10 H13 N5 O4	267.096	C00212	HMDB00050		4.543	1.109	0.15	0.985178	0.99497	0.982	0.847	-0.24	0.610177	0.875549	11.132	0.774	-0.37	0.374272	0.722207	2.755	0.459	-1.12	0.047127	0.567722	2.85	0.705	-0.5	0.301564	0.844505
Folic acid	C19 H19 N7 O6	441.138	C00504	HMDB00121												6.003	1.614	0.69	0.000303537	0.0479192	6.01	1.018	0.03	0.74998	0.926764
Glycerol 3-phosphate	C3 H9 O6 P	172.013	C00093	HMDB00126												7.13	1.359	0.44	0.290924	0.677161	6.764	0.758	-0.4	0.0490895	0.571257
Oleic acid	C18 H34 O2	282.255	C00712	HMDB00207		9.38	8.783	3.13	0.000437616	0.0516188											19.805	1.094	0.13	0.738995	0.924666						1.638	0.854	-0.23	0.355608	0.770816
Pantothenic acid	C9 H17 N O5	219.111	C00864	HMDB00210																	5.095	3.487	1.8	0.00469842	0.293239
L-Palmitoylcarnitine	C23 H45 N O4	399.333	C02990	HMDB00222	acylcarnitines											4.511	0.212	-2.24	0.0368063	0.395319
Pyridoxine	C8 H11 N O3	169.073	C00314	HMDB00239												2.631	0.837	-0.26	0.0458919	0.424091
Taurine	C2 H7 N O3 S	125.015	C00245	HMDB00251							0.804	2.276	1.19	0.00514316	0.605452	5.332	1.798	0.85	4.8521e-05	0.0309047
sphinganine	C18 H39 N O2	301.298	C00836	HMDB00269		7.646	0.175	-2.51	0.00899798	0.165601	4.861	1.232	0.3	0.177452	0.833929
saccharopine	C11 H20 N2 O6	276.131	C00449	HMDB00279												13.024	4.273	2.1	0.0337871	0.381824	7.09	9.956	3.32	0.0384343	0.560275
Uridine	C9 H12 N2 O6	244.07	C00299	HMDB00296																	5.932	1.566	0.65	0.0102535	0.401556
Decanoic acid	C10 H20 O2	172.146	C01571	HMDB00511																											1.551	1.43	0.52	0.0192861	0.770816
Decanoylcarnitine	C17 H33 N O4	315.24		HMDB00651	acylcarnitines	6.895	0.13	-2.94	0.00334384	0.118867
Linoleic acid	C18 H32 O2	280.241	C01595	HMDB00673																	1.445	0.619	-0.69	0.0263322	0.506806
Hexanoylcarnitine	C13 H25 N O4	259.178		HMDB00705	acylcarnitines	5.839	0.117	-3.1	0.000299025	0.0387985						5.96	0.11	-3.18	0.00430921	0.14796
Propionylcarnitine	C10 H19 N O4	217.131	C03017	HMDB00824	acylcarnitines	1.062	0.45	-1.15	0.0061922	0.145331						7.445	0.389	-1.36	0.00151349	0.102851
Arachidonic acid	C20 H32 O2	304.24	C00219	HMDB01043							7.848	0.665	-0.59	0.292676	0.833929						1.445	0.289	-1.79	0.019268	0.445456						1.599	0.794	-0.33	0.357101	0.770816
Coumarin	C9 H6 O2	146.036	C05851	HMDB01218		12.856	0.626	-0.68	0.00445609	0.128484
PGE2	C20 H32 O5	352.225	C00584	HMDB01220		7.169	0.671	-0.58	0.037768	0.329993																					3.186	0.698	-0.52	0.275146	0.770816
4-Aminobenzoic acid	C7 H7 N O2	137.048	C00568	HMDB01392		14.029	1.243	0.31	0.270134	0.65985	1.723	0.985	-0.02	0.396804	0.833929	6.626	1.509	0.59	0.00892462	0.216266
5-Methyltetrahydrofolic acid	C20 H25 N7 O6	459.186	C00440	HMDB01396		4.876	0.328	-1.61	0.0140416	0.204998
Guanosine monophosphate	C10 H14 N5 O8 P	363.057	C00144	HMDB01397		2.242	0.48	-1.06	0.0305561	0.299219
Phosphocreatine	C4 H10 N3 O5 P	211.035	C02305	HMDB01511												6.957	5.134	2.36	0.00146455	0.102851	6.91	6.532	2.71	0.0780341	0.609867
Theophylline	C7 H8 N4 O2	180.063	C07130	HMDB01889																	5.559	0.61	-0.71	0.00114663	0.194724
Salicylic acid	C7 H6 O3	138.031	C00805	HMDB01895		13.1	0.705	-0.5	0.0238316	0.269744
cis-5-Tetradecenoylcarnitine	C21 H39 N O4	369.287		HMDB02014	acylcarnitines	7.479	0.045	-4.48	0.00407413	0.124352
N6-METHYLLYSINE	C7 H16 N2 O2	160.121	C02728	HMDB02038		0.852	0.599	-0.74	0.0105491	0.175496	0.98	1.379	0.46	0.27315	0.833929	9.686	1.904	0.93	0.813966	0.922574
Palmitoleic acid	C16 H30 O2	254.225	C08362	HMDB03229																	1.441	0.687	-0.54	0.0126384	0.403229						1.691	0.12	-3.05	0.0900859	0.770816
Phytosphingosine	C18 H39 N O3	317.293	C12144	HMDB04610		7.402	0.187	-2.42	0.0171861	0.226386	5.712	0.801	-0.32	0.334273	0.833929
ophthalmic acid	C11 H19 N3 O6	289.127		HMDB05765		2.22	0.622	-0.69	0.0492701	0.356145
Linoleyl carnitine	C25 H45 N O4	423.334		HMDB06469	acylcarnitines	7.915	0.053	-4.24	0.00203932	0.0972532
Palmitelaidic acid	C16 H30 O2	254.224		HMDB12328		8.741	1.445	0.53	0.0380166	0.330532
LysoPC(P-18:0)	C26 H54 N O6 P	507.368	C04230	HMDB13122		8.905	0.19	-2.39	0.0123005	0.188875
1,4,5,8-Tetraamino-9,10-anthraquinone	C14 H12 N4 O2	268.097		*												3.39	0.075	-3.73	0.0150641	0.269088
2-(Cyclohexylmethylidene)-1,2,3,4-tetrahydronaphthalen-1-one	C17 H20 O	262.131		*												5.584	3.131	1.65	0.00654238	0.185922
DIGITOGENIN	C27 H44 O5	448.319		C08896							6.686	1.101	0.14	0.861994	0.952994
(+)-Prosopinine	C18 H35 N O3	313.261		C10167							4.893	1.037	0.05	0.368811	0.833929
Chlorobiocin	C35 H37 Cl N2 O11	696.21		C12032		5.117	2.242	1.16	0.595454	0.849185
Cioteronel	C16 H28 O2	252.21		D03515																											1.713	0.796	-0.33	0.323441	0.770816
Adenine	C5 H5 N5	135.054	C00147	HMDB0000034												6.813	0.486	-1.04	0.0301835	0.357401
Adenosine 5'-monophosphate	C10 H14 N5 O7 P	347.062	C00020	HMDB0000045		1.905	0.265	-1.92	0.002554	0.100418						6.817	0.108	-3.21	0.00345753	0.13721
Adenosine 3'5'-cyclic monophosphate	C10 H12 N5 O6 P	329.052	C00575	HMDB0000058		4.573	0.68	-0.56	0.218649	0.631673											4.832	0.747	-0.42	0.0147869	0.412462
Carnitine	C7 H15 N O3	161.105	C00318	HMDB0000062	acylcarnitines	0.946	0.84	-0.25	0.0168987	0.224987						8.352	0.906	-0.14	0.751261	0.898409
Creatine_(1)	C4 H9 N3 O2	131.069	C00300	HMDB0000064		1.238	0.544	-0.88	0.00927568	0.16951
adrenaline	C9 H13 N O3	183.089	C00788	HMDB0000068		4.92	3.514	1.81	0.00600197	0.145331
Dehydroepiandrosterone	C19 H28 O2	288.208	C01227	HMDB0000077		7.17	0.575	-0.8	0.0330953	0.312299
Dihydrothymine_(1)	C5 H8 N2 O2	128.058	C00906	HMDB0000079		0.999	2.359	1.24	0.00563586	0.143668
Cytidine 5'-monophosphate	C9 H14 N3 O8 P	323.05	C00055	HMDB0000095												6.768	0.605	-0.73	1.353e-06	0.00422948
L-Glutathione (reduced)	C10 H17 N3 O6 S	307.083	C00051	HMDB0000125		1.871	1.008	0.01	0.851034	0.947796						6.132	4.576	2.19	0.0505567	0.445309	6.135	19.957	4.32	0.0137356	0.403229
L-Phenylalanine	C9 H11 N O2	165.079	C00079	HMDB0000159							3.034	0.839	-0.25	0.576759	0.863525	11.132	0.334	-1.58	0.0522988	0.446968
DL-Lysine	C6 H14 N2 O2	129.079	C00047	HMDB0000182												13.837	2.032	1.02	0.0454443	0.424091	13.603	2.442	1.29	0.19858	0.703073
Acetyl-L-carnitine	C9 H17 N O4	203.115	C02571	HMDB0000201	acylcarnitines	1.42	0.336	-1.57	0.0736468	0.409481						7.931	0.511	-0.97	0.00186608	0.113884						7.973	0.373	-1.42	0.0769231	0.844505
Acetylcarnitine	C9 H17 N O4	203.115	C02571	HMDB0000201	acylcarnitines	1.06	0.46	-1.12	0.003643	0.121264
2-Oxoglutaric acid	C5 H6 O5	146.021	C00026	HMDB0000208																	5.624	1.676	0.74	0.0133395	0.403229
D-PANTOTHENIC ACID	C9 H17 N O5	219.11	C00864	HMDB0000210		4.918	3.355	1.75	0.00781398	0.156763
D-PANTOTHENIC ACID	C9 H17 N O5	219.11	C00864	HMDB0000210		1.067	9.87	3.3	0.0176871	0.230643
Ornithine	C5 H12 N2 O2	132.09	C00077	HMDB0000214												13.745	0.224	-2.16	0.0544358	0.452037
Palmitic acid	C16 H32 O2	256.241	C00249	HMDB0000220																	25.597	3.661	1.87	0.0236856	0.485694
D-Sphingosine	C18 H37 N O2	299.282	C00319	HMDB0000252		7.558	0.355	-1.49	0.00942233	0.169551
Sphingosine (d18:1)	C18 H37 N O2	281.271	C00319	HMDB0000252		7.558	0.271	-1.88	0.0193192	0.240069	5.825	1.321	0.4	0.149428	0.833929											3.171	1.209	0.27	0.515673	0.870643
L-Pyroglutamic acid_(1)	C5 H7 N O3	129.043	C01879	HMDB0000267		1.13	0.17	-2.56	0.0125163	0.191057
D-Erythro-sphingosine 1-phosphate	C18 H38 N O5 P	379.248	C06124	HMDB0000277		7.785	0.195	-2.36	0.00369986	0.121264
Uridine 5'-triphosphate	C9 H15 N2 O15 P3	483.966	C00075	HMDB0000285												6.916	1.48	0.57	0.96522	0.987653	6.899	0.189	-2.4	0.0282632	0.509665
UDP-N-acetylglucosamine	C17 H27 N3 O17 P2	607.079	C00043	HMDB0000290												5.687	0.704	-0.51	0.000106514	0.0369958	5.69	0.657	-0.61	0.00963423	0.401556
Arginine	C6 H14 N4 O2	157.085	C00062	HMDB0000517		0.874	0.874	-0.19	0.0195425	0.241399
Adenosine triphosphate (ATP)	C10 H16 N5 O13 P3	506.994	C00002	HMDB0000538												6.771	2.399	1.26	0.00217207	0.119121	6.722	1.327	0.41	0.549128	0.855216
Adenosine triphosphate_(1)	C10 H16 N5 O13 P3	506.995	C00002	HMDB0000538		3.78	1.742	0.8	0.0121896	0.188875
Creatinine	C4 H7 N3 O	113.059	C00791	HMDB0000562												6.504	1.197	0.26	0.0208434	0.297517
Cinnamic acid	C9 H8 O2	148.052	C10438	HMDB0000567		0.647	1.706	0.77	0.0356183	0.321063
L-glutamine	C5 H10 N2 O3	129.042	C00064	HMDB0000641							0.839	1.916	0.94	0.0210759	0.833929
α-Aspartylphenylalanine	C13 H16 N2 O5	280.105		HMDB0000706												5.763	1.329	0.41	0.018138	0.28611
Indole_(1)	C8 H7 N	117.058	C00463	HMDB0000738		9.992	1.614	0.69	0.00606335	0.145331
5-Hydroxyindole-3-acetic acid	C10 H9 N O3	191.058	C05635	HMDB0000763		5.601	1.24	0.31	0.0727912	0.407976
L-Octanoylcarnitine	C15 H29 N O4	287.209	C02838	HMDB0000791		6.441	0.094	-3.4	0.00156741	0.0865409	4.289	0.232	-2.11	0.000298549	0.125519	5.141	0.114	-3.13	0.000161511	0.0378272
phosphoglycolate	C2 H5 O6 P	155.983	C00988	HMDB0000816		10.878	0.268	-1.9	0.0135026	0.200072											6.786	4.282	2.1	0.0844764	0.614666						6.87	0.111	-3.17	0.0394236	0.770816
phosphoglycolate_(1)	C2 H5 O6 P	155.983	C00988	HMDB0000816		11.178	12.702	3.67	0.00287495	0.109713
Palmitoylcarnitine	C23 H45 N O4	399.334	C02990	HMDB0000846	acylcarnitines	8.059	0.079	-3.67	0.000156079	0.0311558	6.624	0.31	-1.69	0.254613	0.833929											4.517	0.298	-1.75	0.106575	0.844505
1-nonanoic acid	C9 H18 O2	158.131	C01601	HMDB0000847		0.634	2.47	1.3	0.00125626	0.0776188
N-Acetyl-L-Citrulline	C8 H15 N3 O4	217.105	C15532	HMDB0000856												6.158	0.659	-0.6	0.396374	0.733166	6.51	6.139	2.62	0.0181906	0.439466
NAD+	C21 H28 N7 O14 P2	664.114	C00003	HMDB0000902		3.285	0.258	-1.95	0.0529765	0.3661						6.299	0.839	-0.25	0.418056	0.740986
L-(+)-Citrulline	C6 H13 N3 O3	175.095	C00327	HMDB0000904		0.926	1.494	0.58	0.00797407	0.156763						6.749	1.837	0.88	0.033834	0.381824
L-(+)-Citrulline_(1)	C6 H13 N3 O3	175.095	C00327	HMDB0000904												6.739	2.225	1.15	0.0117404	0.243381
Uridine 5'-diphosphoglucuronic acid	C15 H22 N2 O18 P2	580.036	C00167	HMDB0000935																	5.805	1.505	0.59	0.004347	0.293239
3-Phosphonooxypyruvic acid_(1)	C3 H5 O7 P	183.978	C03232	HMDB0001024		10.912	0.049	-4.36	0.0133635	0.200072
Guanosine 5'-diphospho-D-mannose	C16 H25 N5 O16 P2	605.08	C00096	HMDB0001163																	5.919	1.925	0.95	0.024348	0.489845
deoxyuridine	C9 H12 N2 O5	228.074	C00526	HMDB00012												5.545	1.145	0.2	0.40634	0.736102
Hydantoin-5-propionic acid	C6 H8 N2 O4	172.048	C05565	HMDB0001212												5.978	1.246	0.32	0.195897	0.616762
Prostaglandin E2	C20 H32 O5	334.214	C00584	HMDB0001220		7.169	0.714	-0.49	0.0469865	0.35062
5-aminoimidazole ribotide	C8 H14 N3 O7 P	295.058	C03373	HMDB0001235		0.863	0.527	-0.92	0.00583644	0.145331
Acetanilide	C8 H9 N O	135.068	C07565	HMDB0001250		3.1	0.635	-0.66	0.224235	0.637098						1.412	1.515	0.6	0.0394982	0.406728
Guanosine triphosphate	C10 H16 N5 O14 P3	522.991	C00044	HMDB0001273		1.255	4.24	2.08	0.0818297	0.427259
N-Acetyl-α-D-glucosamine 1-phosphate	C8 H16 N O9 P	301.057	C04256	HMDB0001367																	6.821	1.71	0.77	0.0101038	0.401556
Cytidine 5'-diphosphocholine	C14 H26 N4 O11 P2	488.106	C00307	HMDB0001413		1.03	0.542	-0.88	0.0218956	0.254794
AICA ribonucleotide	C9 H15 N4 O8 P	338.062	C04677	HMDB0001517																	0.944	0.682	-0.55	0.0178491	0.436697
Tretinoin	C20 H28 O2	300.209		HMDB0001852		7.209	0.394	-1.34	0.0104827	0.175496																					1.948	0.805	-0.31	0.420067	0.78523
7a-Hydroxy-cholestene-3-one_(1)	C27 H44 O2	400.334	C05455	HMDB0001993							18.716	0.092	-3.44	0.000263225	0.125519
Eicosapentanoic acid	C20 H30 O2	302.224	C04628	HMDB0001999							7.586	0.832	-0.27	0.686069	0.889665						1.45	0.155	-2.69	0.00187764	0.2327						1.622	0.623	-0.68	0.289461	0.770816
Docosatetraenoic acid	C22 H36 O2	332.273	C16527	HMDB0002226																	1.445	0.257	-1.96	0.0221422	0.472104						1.579	0.92	-0.12	0.387031	0.776357
4147610	C19 H37 N O4	343.272		HMDB0002250		7.289	0.096	-3.39	0.00305283	0.114813
icomucret	C20 H32 O3	320.236	C04742	HMDB0003876																	1.45	0.416	-1.27	0.00404839	0.285625						1.811	0.692	-0.53	0.285451	0.770816
Stachydrine	C7 H13 N O2	143.094	C10172	HMDB0004827		0.855	0.595	-0.75	0.00171347	0.0926346						17.694	0.683	-0.55	0.332222	0.698101
Oleoyl-L- Carnitine	C25 H47 N O4	425.35		HMDB0005065		8.159	0.108	-3.21	0.00072552	0.0676294
4149853	C21 H41 N O4	371.303		HMDB0005066		7.673	0.133	-2.91	0.00481761	0.135628
MFCD00065806	C20 H28 O3	316.203	C14717	HMDB0005079							5.184	0.653	-0.62	0.173858	0.833929						1.464	0.585	-0.77	0.0174014	0.432479
(-)-L-Carnitine	C7 H15 N O3	161.105	C00318	HMDB00062	acylcarnitines						0.86	0.993	-0.01	0.574364	0.863525
1-Phenyl-3-methyl-5-pyrazolone	C10 H10 N2 O	157.052	C13008	HMDB0006240												1.427	0.532	-0.91	0.0702866	0.489873
(2E)-hexadecenoylcarnitine	C23 H43 N O4	397.319		HMDB0006317	acylcarnitines	7.799	0.169	-2.56	0.00790633	0.156763
1-oleoyl-2-arachidonoyl-sn-glycerol-3-phosphoethanolamine_(1)	C43 H76 N O8 P	765.528		HMDB0009069		11.053	0.401	-1.32	0.0402577	0.335077
Cytidine 5'-monophosphate (hydrate)	C9 H14 N3 O8 P	345.034	C00055	HMDB00095		1.006	0.373	-1.42	0.118691	0.491982						6.026	1.117	0.16	0.397553	0.733166
1-[(9Z)-hexadecenoyl]-sn-glycero-3-phosphocholine	C24 H48 N O7 P	493.316	C04230	HMDB0010383		8.053	0.189	-2.4	0.0169838	0.224987
1-arachidonoyl-sn-glycero-3-phosphocholine	C28 H50 N O7 P	543.332	C04230	HMDB0010395		8.209	0.087	-3.52	9.50522e-06	0.00822202
1-(1Z-hexadecenyl)-sn-glycero-3-phosphocholine	C24 H50 N O6 P	479.337		HMDB0010407		8.748	0.215	-2.22	0.00406137	0.124352
Hexitol	C6 H14 O6	182.079		HMDB00107							0.841	1.446	0.53	0.201469	0.833929
3-oxopalmitic acid	C16 H30 O3	270.219		HMDB0010733		8.941	1.651	0.72	0.0392535	0.335075
1-stearoyl-sn-glycero-3-phosphoethanolamine	C23 H48 N O7 P	481.315		HMDB0011130		8.058	0.47	-1.09	0.0022322	0.0998718
1-Palmitoyl-2-hydroxy-sn-glycero-3-PE	C21 H44 N O7 P	453.285		HMDB0011503		8.3	0.311	-1.69	0.000147277	0.0311558
1-arachidonoyl-sn-glycero-3-phosphoethanolamine_(1)	C25 H44 N O7 P	501.285		HMDB0011517		8.159	0.152	-2.72	0.000680158	0.0676294
lysophosphatidylethanolamine (22:6(4Z,7Z,10Z,13Z,16Z,19Z)/0:0)	C27 H44 N O7 P	525.285		HMDB0011526		8.156	0.118	-3.08	0.0038114	0.121264
gamma-Glu-gln	C10 H17 N3 O6	275.113	C05283	HMDB0011738																	6.328	3.436	1.78	0.0144216	0.406196
1-heptadecanoyl-sn-glycero-3-phosphocholine_(1)	C25 H52 N O7 P	509.348	C04230	HMDB0012108		8.897	0.313	-1.68	0.0019029	0.0968241
Palmitamide	C16 H33 N O	255.256		HMDB0012273		7.264	0.285	-1.81	0.0488067	0.354771
Reduced Glutathione	C10 H17 N3 O6 S	307.083	C00051	HMDB00125		5.583	1.173	0.23	0.525331	0.813871
Guanine	C5 H5 N5 O	151.049	C00242	HMDB00132		4.584	0.864	-0.21	0.604673	0.851869						5.931	1.12	0.16	0.534598	0.795172
O-heptanoylcarnitine	C14 H27 N O4	273.193		HMDB0013238	acylcarnitines	6.09	0.357	-1.48	0.00278237	0.107765
1872050	C12 H23 N O3	229.167		HMDB0013267		6.793	1.416	0.5	0.0205644	0.247126
trans-2-Dodecenoylcarnitine	C19 H35 N O4	341.256		HMDB0013326	acylcarnitines	7.098	0.14	-2.83	3.91136e-05	0.0203
9,12-Hexadecadienoylcarnitine	C23 H41 N O4	395.302		HMDB0013334	acylcarnitines	7.589	0.15	-2.74	0.000129999	0.0306678
DL-Tryptophan	C11 H12 N2 O2	187.063	C00525	HMDB0013609		5.167	0.909	-0.14	0.410512	0.757127	3.32	1.14	0.19	0.355934	0.833929	4.534	0.643	-0.64	0.660535	0.861	4.638	0.758	-0.4	0.0833206	0.614666
N,N-Dimethylsphingosine	C20 H41 N O2	327.313	C13914	HMDB0013645							9.833	1.058	0.08	0.449088	0.833929	19.24	1.406	0.49	0.0179539	0.28611						2.828	0.64	-0.64	0.045512	0.7455
2E-Crotamiton	C13 H17 N O	203.131	D01381	HMDB0014410		8.949	0.492	-1.02	0.0404329	0.335077
Gemcitabine	C9 H11 F2 N3 O4	241.092	C07650	HMDB0014584												5.089	4.393	2.14	0.000336406	0.0486301
Gemcitabine_(1)	C9 H11 F2 N3 O4	263.073	C07651	HMDB0014584												5.083	2.64	1.4	0.00399469	0.142512
DL-Glutamic acid	C5 H9 N O4	147.053	C00025	HMDB00148												10.121	0.391	-1.35	0.216355	0.626665	20.098	1.545	0.63	0.496438	0.831897
primidone	C12 H14 N2 O2	218.105	C07371	HMDB0014932		5.606	0.524	-0.93	0.018223	0.231807
(E)-progabide	C17 H16 Cl F N2 O2	334.087		HMDB0014975		1.031	1.652	0.72	0.0249882	0.278939
Buprenorphine	C29 H41 N O4	467.301	C08007	HMDB0015057		7.864	0.277	-1.85	0.0272728	0.285272
Vigabatrin	C6 H11 N O2	129.079	C07500	HMDB0015212		1.141	0.44	-1.18	0.00856954	0.163514	0.98	1.038	0.05	0.373858	0.833929	3.967	6.917	2.79	0.158124	0.589646
Chloroxine	C9 H5 Cl2 N O	212.975	D03472	HMDB0015373		14.249	0.456	-1.13	0.0868755	0.436903
Sulfamethazine	C12 H14 N4 O2 S	278.086	C19530	HMDB0015522		7.615	0.747	-0.42	0.127581	0.514675						5.99	0.307	-1.71	0.0353534	0.389475
VIRILON	C27 H40 O3	412.297	C07198	HMDB0015655							4.434	0.687	-0.54	0.0314884	0.833929
L-(+)-Alanine	C3 H7 N O2	89.0479	C00041	HMDB00161												7.07	1.779	0.83	0.736932	0.890127
DL-Threonine	C4 H9 N O3	119.058	C00188	HMDB00167							0.824	1.13	0.18	0.295327	0.833929
Threonine	C4 H9 N O3	119.058	C00188	HMDB00167		0.898	1.195	0.26	0.256186	0.650631
asparagine	C4 H8 N2 O3	132.053	C16438	HMDB00168												5.543	1.226	0.29	0.401412	0.734403
DL-Histidine	C6 H9 N3 O2	155.069	C00135	HMDB00177		0.934	1.076	0.11	0.896529	0.957258
Serine	C3 H7 N O3	105.043	C00065	HMDB00187							0.777	6.616	2.73	0.509638	0.840731	6.364	0.995	-0.01	0.72991	0.888589
DL-Aspartic acid	C4 H7 N O4	133.037	C00049	HMDB00191							0.798	1.538	0.62	0.267667	0.833929
noradrenaline	C8 H11 N O3	169.073	C00547	HMDB00216		1.063	1.041	0.06	0.964716	0.985994
Testosterone	C19 H28 O2	288.209	C00535	HMDB00234							7.112	0.935	-0.1	0.668936	0.887556
Thiamine	C12 H16 N4 O S	264.104	C00378	HMDB00235							0.93	0.634	-0.66	0.870835	0.954513
Phosphoenolpyruvic acid	C3 H5 O6 P	167.982	C00074	HMDB00263																	6.664	1.167	0.22	0.50708	0.835504
D-Alanyl-D-serine	C6 H12 N2 O4	176.079		HMDB0028696												5.927	1.192	0.25	0.0784397	0.500686	5.922	3.059	1.61	0.00132864	0.197979
Uridine monophosphate	C9 H13 N2 O9 P	324.037	C00105	HMDB00288																	6.558	0.758	-0.4	0.35632	0.790817
Methionylleucine	C11 H22 N2 O3 S	262.135		HMDB0028977		5.343	0.285	-1.81	0.0383391	0.330532
Cinnamyl alcohol	C9 H10 O	134.073	C02394	HMDB0029698		8.162	0.53	-0.92	0.044192	0.343155	8.577	1.076	0.11	0.287691	0.833929	1.125	0.612	-0.71	0.125682	0.577006
Paradol	C17 H26 O3	278.189	C10482	HMDB0030801																											1.545	4.383	2.13	0.0373355	0.770816
Dimethyl fumarate	C6 H8 O4	144.042		HMDB0031257												7.93	0.506	-0.98	0.0473796	0.428504
Methyl 2-octynoate	C9 H14 O2	154.099		HMDB0031302		9.623	7.507	2.91	0.0165363	0.224316
NPYR	C4 H8 N2 O	100.064	C19285	HMDB0031642												6.414	1.652	0.72	0.0136726	0.257473
3,4-Dihydroxyphenylglycol	C8 H10 O4	170.058		HMDB00318		13.469	0.774	-0.37	0.285577	0.661518
Celestolide	C17 H24 O	244.182		HMDB0031867		7.17	0.339	-1.56	0.0662426	0.393029
Benzophenone	C13 H10 O	182.073	C06354	HMDB0032049		8.321	0.395	-1.34	0.0416852	0.338041
N-Acetyl-L-histidine	C8 H11 N3 O3	197.079	C02997	HMDB0032055												5.877	1.863	0.9	0.00831347	0.20907
7-Methyl-2,6,9,12-tetraoxahexadecane	C13 H28 O4	248.199		HMDB0032181		7.649	0.341	-1.55	0.025105	0.278939
Diethylpyrocarbonate	C6 H10 O5	162.052	C11591	HMDB0032872												5.577	1.461	0.55	0.262548	0.660989	5.808	1.359	0.44	0.0514402	0.573568
Furfural	C5 H4 O2	96.0212	C14279	HMDB0032914												5.817	1.322	0.4	0.00401184	0.142512
Coumarone	C8 H6 O	118.042	C14512	HMDB0032929		1.067	2.137	1.1	0.340243	0.70664	0.96	0.996	-0.01	0.756787	0.917686	1.413	1.5	0.58	0.047059	0.427635
Amide C18	C18 H37 N O	283.287	C13846	HMDB0034146		7.598	0.168	-2.57	0.00759022	0.156763	5.637	0.987	-0.02	0.553913	0.85669
L-Theanine	C7 H14 N2 O3	174.1	C01047	HMDB0034365												6.071	0.914	-0.13	0.0130351	0.250491	5.775	7.924	2.99	0.0258715	0.50456
Retinyl acetate	C22 H32 O2	328.239		HMDB0035185		9.891	1.111	0.15	0.482897	0.799736	9.224	0.515	-0.96	0.550726	0.85669						1.448	0.207	-2.27	0.0116938	0.403229						3.143	1.437	0.52	0.570999	0.834873
Retinyl acetate_(1)	C22 H32 O2	328.24		HMDB0035185		9.038	0.456	-1.13	0.011422	0.182964
(2Z)-4-Methyl-2-phenyl-2-pentenal	C12 H14 O	174.104		HMDB0037281		7.653	0.026	-5.28	0.000191228	0.0322192
Indole-3-acetyl-L-aspartic acid	C14 H14 N2 O5	290.093		HMDB0038666												1.314	1.324	0.4	0.0184792	0.28611
5-BETA-D-RIBOFURANOSYLPICOLINAMIDE ADENINE-DINUCLEOTIDE_(1)	C21 H27 N7 O14 P2	663.108		HMDB0039421		3.375	0.261	-1.94	0.026759	0.283427
Ethyl eicosapentaenoic acid	C22 H34 O2	330.257	C16184	HMDB0039530																	1.445	0.216	-2.21	0.0134638	0.403229						1.591	0.798	-0.33	0.34118	0.770816
Flusilazole	C16 H15 F2 N3 Si	315.1	C18733	HMDB0039815																	5.095	3.247	1.7	0.0286867	0.509665
VS1150000	C18 H34 O4	314.247		HMDB0041220																	1.427	1.225	0.29	0.354887	0.789333						1.693	0.415	-1.27	0.0300122	0.770816
Benzbromarone	C17 H12 Br2 O3	421.915		HMDB0041834		0.76	0.501	-1	0.000923742	0.067637
toluidine	C7 H9 N	107.074	C14403	HMDB0041965		9.088	3.103	1.63	0.0442874	0.343155
oxmetidine	C19 H21 N5 O3 S	399.137	C11803	HMDB0041970		1.029	1.812	0.86	0.000783688	0.067637
3,4-Dihydroxyphenylpropionic acid	C9 H10 O4	164.047	C10447	HMDB00423												5.064	1.483	0.57	0.938806	0.976881
2-Aminoadipic acid	C6 H11 N O4	161.068		HMDB00510		1.426	0.637	-0.65	0.864308	0.949568											6.451	3.55	1.83	0.10452	0.622821
Creatinine	C4 H7 N3 O	113.059	C00791	HMDB00562		0.986	1.088	0.12	0.460915	0.787795	0.9	0.93	-0.1	0.376948	0.833929	3.947	0.992	-0.01	0.465047	0.760594
Colfosceril palmitate	C40 H80 N O8 P	733.559	D03585	HMDB00564		8.257	0.644	-0.64	0.114714	0.487511	9.842	1.127	0.17	0.705515	0.896467
(5R)-5-(Phosphonooxy)-L-lysine	C6 H15 N2 O6 P	242.067	C03366	HMDB0059600		0.766	0.303	-1.72	0.00234636	0.100418
alpha-methylstyrene	C9 H10	118.078	C14395	HMDB0059899							6.492	1.113	0.15	0.287069	0.833929	1.125	0.51	-0.97	0.0436493	0.422438						1.198	0.57	-0.81	0.917114	0.974148
4-Dodecylbenzenesulfonic acid	C18 H30 O3 S	326.192		HMDB0059915																	0.99	0.791	-0.34	0.811206	0.948571						0.991	0.565	-0.82	0.23913	0.770816
4-(3,4-Difluorophenyl)-4-oxobutanoic acid	C10 H8 F2 O3	214.044		HMDB0060951		0.864	0.656	-0.61	0.0110448	0.179133
3-hydroxydodecanoylcarnitine	C19 H37 N O5	359.267		HMDB0061638	acylcarnitines	6.849	0.234	-2.1	0.00373254	0.121264
3-hydroxytetradecanoylcarnitine	C21 H41 N O5	387.298		HMDB0061640	acylcarnitines	7.237	0.214	-2.23	0.00427805	0.126154
Platelet-activating factor_(1)	C26 H54 N O7 P	523.364		HMDB0062195		9.255	0.005	-7.77	0.000904786	0.067637
1- Phenylurea	C7 H8 N2 O	136.063		HMDB0062267		11.254	2.619	1.39	7.52985e-05	0.0252799
O-pentadecanoylcarnitine	C22 H43 N O4	385.319		HMDB0062517	acylcarnitines	7.863	0.063	-3.98	5.24554e-05	0.0226869
Linoleamide	C18 H33 N O	279.255		HMDB0062656		7.321	0.251	-2	0.0494312	0.356316
L-Kynurenine	C10 H12 N2 O3	191.058	C00328	HMDB00684		4.665	1.144	0.19	0.750776	0.911584
L-(+)-Leucine	C6 H13 N O2	131.095	C00123	HMDB00687		1.068	1.169	0.23	0.757193	0.91483
L-(-)-methionine	C5 H11 N O2 S	149.051	C00073	HMDB00696		1.721	0.433	-1.21	0.340355	0.70664
L-(-)-Methionine	C5 H11 N O2 S	132.024	C00073	HMDB00696		1.114	1.399	0.48	0.781489	0.923901											5.282	1.104	0.14	0.442389	0.808404
Methionine	C5 H11 N O2 S	132.024	C00073	HMDB00696												5.257	0.92	-0.12	0.807015	0.920032
Indoleacrylic acid	C11 H9 N O2	187.063		HMDB00734		1.075	1.154	0.21	0.400476	0.750892
N-Acetyl-L-aspartic acid	C6 H9 N O5	175.048	C01042	HMDB00812																											5.939	1.149	0.2	0.308572	0.770816
stearoylcarnitine	C25 H49 N O4	427.367		HMDB00848	acylcarnitines	8.179	0.593	-0.75	0.124956	0.509042
Formiminoglutamic Acid	C6 H10 N2 O4	174.063		HMDB00854												5.527	1.364	0.45	0.237567	0.642981
Pimelic acid	C7 H12 O4	160.074	C02656	HMDB00857																	20.1	0.724	-0.47	0.8955	0.97111
Trigonelline	C7 H7 N O2	137.047	C01004	HMDB00875												5.685	0.978	-0.03	0.666184	0.864104
Valine	C5 H11 N O2	117.079	C16436	HMDB00883		1.064	0.964	-0.05	0.832388	0.941604
Cholesteryl palmitate	C43 H76 O2	624.584	C11251	HMDB00885																											1.06	1.035	0.05	0.435699	0.788539
Succinyladenosine	C14 H17 N5 O8	383.107		HMDB00912		4.92	0.733	-0.45	0.219652	0.631673
Tryptophan	C11 H12 N2 O2	204.09	C00078	HMDB00929		1.058	0.41	-1.29	0.365293	0.727361
S-Adenosylhomocysteine	C14 H20 N6 O5 S	384.12	C00021	HMDB00939												6.353	1.105	0.14	0.533445	0.795172	6.344	1.024	0.03	0.45239	0.812464
THREONIC ACID	C4 H8 O5	136.038		HMDB00943																	2.951	0.902	-0.15	0.440077	0.806944
Diethyl phthalate	C12 H14 O4	222.089	C14175	HMDB0094660		8.003	0.49	-1.03	0.0475347	0.352922	6.216	0.832	-0.26	0.647499	0.885579
HO-dPEG8-OH	C16 H34 O9	370.219		HMDB0094680		5.423	1.811	0.86	0.0365988	0.325253
S-Lactoylglutathione	C13 H21 N3 O8 S	379.104		HMDB01066		4.428	1.263	0.34	0.837459	0.942136											6.085	1.159	0.21	0.82382	0.951006
N-Acetyl-L-glutamic acid	C7 H11 N O5	189.063	C00624	HMDB01138												1.036	0.905	-0.14	0.396669	0.733166
5'-S-Methyl-5'-thioadenosine	C11 H15 N5 O3 S	297.088		HMDB01173												1.439	1.034	0.05	0.336094	0.698101						1.903	1.153	0.21	0.147776	0.844505
Indole-3-acetaldehyde	C10 H9 N O	159.068	C00637	HMDB01190												4.415	0.791	-0.34	0.767002	0.902074
2'-Deoxycytidine-5'-monophosphorate	C9 H14 N3 O7 P	307.057		HMDB01202												5.653	0.161	-2.64	0.105436	0.556742
D-Glucosamine 6-phosphate	C6 H14 N O8 P	259.046	C00352	HMDB01254																	6.161	1.022	0.03	0.479747	0.826884
Spermine	C10 H26 N4	202.216	C00750	HMDB01256		0.849	0.848	-0.24	0.712393	0.893936
Thymidine 5'-diphosphate	C10 H16 N2 O11 P2	402.016		HMDB01274																	6.54	1.657	0.73	0.106719	0.62749
Adenosine diphosphate	C10 H15 N5 O10 P2	427.029		HMDB01341		1.244	1.397	0.48	0.345136	0.710815						12.877	0.814	-0.3	0.335946	0.698101
Thymidine triphosphate	C10 H17 N2 O14 P3	481.988	C00459	HMDB01342												6.606	1.733	0.79	0.154605	0.588064
Alpha-Linolenic acid	C18 H30 O2	278.224	C06427	HMDB01388							5.891	0.876	-0.19	0.383334	0.833929																1.645	1.09	0.12	0.482359	0.807572
4'-Phosphopantetheine	C11 H23 N2 O7 P S	358.096	C01134	HMDB01416		4.904	0.809	-0.31	0.347773	0.713415
Niacin	C6 H5 N O2	123.032	C00253	HMDB01488							1.793	0.944	-0.08	0.785441	0.925655
Glucosamine	C6 H13 N O5	179.08	C00329	HMDB01514												6.735	1.533	0.62	0.27191	0.660989
D-ribose 5-phosphate	C5 H11 O8 P	230.02	C00117	HMDB01548																	6.622	1.026	0.04	0.717618	0.917115
4-methylthio-2-oxobutanoic acid	C5 H8 O3 S	148.02	C01180	HMDB01553		1.724	0.918	-0.12	0.931482	0.969664
PC	C42 H80 N O8 P	757.563	C00588	HMDB01565		8.659	0.725	-0.46	0.237013	0.639918
Caffeine	C8 H10 N4 O2	194.08	C07481	HMDB01847		4.947	0.962	-0.06	0.841852	0.944174
Propranolol	C16 H21 N O2	259.16	C07407	HMDB01849		7.37	1.209	0.27	0.687914	0.884607
Paracetamol	C8 H9 N O2	151.063	D00217	HMDB01859		13.992	0.907	-0.14	0.639638	0.868103
4687	C10 H12 N4 O5	268.08	C01525	HMDB01860																	5.637	0.689	-0.54	0.343993	0.785312
Benzoic acid	C7 H6 O2	122.037	C00180	HMDB01870		1.088	1.185	0.24	0.905118	0.959785
Calcitriol	C27 H44 O3	416.328	C01673	HMDB01903							5.858	0.852	-0.23	0.565908	0.858771
7a-Hydroxy-cholestene-3-one	C27 H44 O2	400.334		HMDB01993							1.132	0.468	-1.1	0.490478	0.837534
Methionine sulfoxide	C5 H11 N O3 S	148.019		HMDB02005		1.727	1.454	0.54	0.263412	0.653385
Erucic acid	C22 H42 O2	338.32	C08316	HMDB02068																											1.584	0.994	-0.01	0.425124	0.787073
Phosphoric acid	H3 O4 P	97.9771	C00009	HMDB02142												10.775	0.833	-0.26	0.688195	0.871323
(all-E)-Phytoene	C40 H64	544.502		HMDB02181																	1.898	1.118	0.16	0.645429	0.88858
Docosahexaenoic acid	C22 H32 O2	340.261	C06429	HMDB02183							7.235	1.28	0.36	0.378779	0.833929											1.825	1.383	0.47	0.404401	0.844505
Arachidic acid	C20 H40 O2	312.304	C06425	HMDB02212																	1.448	0.737	-0.44	0.539858	0.84872
IpA	C11 H11 N O2	189.079		HMDB02302		4.693	0.746	-0.42	0.404072	0.752739
8,9-DiHETrE	C20 H34 O4	338.245		HMDB02311																											1.712	0.792	-0.34	0.480141	0.806815
Nervonic acid	C24 H46 O2	366.351	C08323	HMDB02368																											1.573	0.861	-0.22	0.347111	0.770816
1-O-oleoyl-sn-glycero-3-phosphoserine	C24 H46 N O9 P	523.29		HMDB0240603		9.112	2.116	1.08	0.000898198	0.067637
Aniline	C6 H7 N	93.058	C00292	HMDB03012												12.955	11.808	3.56	0.511433	0.787207
Arabinosylhypoxanthine	C10 H12 N4 O5	268.081		HMDB03040		1.069	1.382	0.47	0.925815	0.966797
L-Ergothioneine	C9 H15 N3 O2 S	229.088		HMDB03045		1.051	0.829	-0.27	0.472614	0.790227
D-Raffinose	C18 H32 O16	526.15		HMDB03213												5.93	3.159	1.66	0.492606	0.771873
Solanidine	C27 H43 N O	397.337	C06543	HMDB03236							7.167	0.843	-0.25	0.62345	0.878198
Thromboxane B2	C20 H34 O6	387.262	C05963	HMDB03252		6.586	1.132	0.18	0.380105	0.735529						4.316	1.22	0.29	0.345182	0.704646
8-hydroxy-deoxyguanosine	C10 H13 N5 O5	283.091		HMDB03333		4.584	0.79	-0.34	0.592647	0.84703
benzoquinone	C6 H4 O2	108.021		HMDB03364												5.684	0.828	-0.27	0.711134	0.882496
Biacetyl	C4 H6 O2	86.037	C00741	HMDB03407		0.942	1.023	0.03	0.885	0.954123
D-Cysteine	C3 H7 N O2 S	121.02	C00793	HMDB03417		0.911	0.553	-0.85	0.799314	0.929726
Desthiobiotin	C10 H18 N2 O3	214.131	C01909	HMDB03581												6.669	0.982	-0.03	0.656167	0.857874
epsilon-(gamma-Glutamyl)-lysine	C11 H21 N3 O5	275.148		HMDB03869		1.042	0.539	-0.89	0.125906	0.509712
7-Dehydrodesmosterol	C27 H42 O	382.323	C05107	HMDB03896							14.643	1.639	0.71	0.57819	0.863525
Anandamide	C22 H37 N O2	347.282	C11695	HMDB04080							8.34	0.992	-0.01	0.987832	0.992215
N-acetylneuraminic acid 9-phosphate	C11 H20 N O12 P	389.071		HMDB04381												4.805	0.349	-1.52	0.109788	0.558812
13S-hydroxyoctadecadienoic acid	C18 H32 O3	296.237		HMDB04667																											2.123	0.9	-0.15	0.36631	0.770816
2,5-Furandicarboxylic acid	C6 H4 O5	156.006		HMDB04812		0.858	1.299	0.38	0.675869	0.878898
Valdecoxib	C16 H14 N2 O3 S	292.089	D02709	HMDB05033												6.074	1.4	0.48	0.172353	0.598641
Aceglutamide	C7 H12 N2 O4	188.079	D07063	HMDB06029												5.519	1.149	0.2	0.484875	0.769011
Juniperic acid	C16 H32 O3	272.236	C18218	HMDB06294																	1.451	1.165	0.22	0.697484	0.908187						2.894	0.909	-0.14	0.180205	0.770816
1-palmitoyl-2-oleoyl-sn-glycero-3-phosphocholine	C42 H82 N O8 P	759.576		HMDB07972		10.164	0.368	-1.44	0.285339	0.661518
1-Oleoyl-2-Stearoyl-sn-Glycero-3-Phosphocholine	C44 H86 N O8 P	787.609		HMDB08102		11.299	2.415	1.27	0.158116	0.563464
fosfocreatinine	C4 H8 N3 O4 P	193.025		HMDB08102		0.851	1.13	0.18	0.991182	0.996559						6.941	2.354	1.24	0.161661	0.591205
1-myristoyl-2-oleoyl-sn-glycero-3-phosphoethanolamine	C37 H72 N O8 P	689.497		HMDB08828		8.363	0.667	-0.58	0.148743	0.549057
1-stearoyl-2-arachidonoyl-sn-glycero-3-phosphoethanolamine	C43 H78 N O8 P	767.543		HMDB09003		10.028	1.213	0.28	0.506232	0.805452
1-stearoyl-2-oleoyl-sn-glycero-3-phosphoserine	C42 H80 N O10 P	789.551		HMDB10163		7.363	0.858	-0.22	0.824761	0.938732
PC(P-16:0/18:4(6Z,9Z,12Z,15Z))	C42 H76 N O7 P	737.532		HMDB11214		7.997	0.602	-0.73	0.173457	0.577079
1-(sn-glycero-3-phospho)-1D-myo-inositol	C9 H19 O11 P	334.067	C01225	HMDB11649																	5.831	0.962	-0.06	0.569879	0.861277
Kinetin	C10 H9 N5 O	215.081	C08272	HMDB12245							12.607	1.038	0.05	0.971661	0.987606
Hexadecanamide	C16 H33 N O	255.256		HMDB12273		10.215	0.418	-1.26	0.650633	0.870821	9.41	1.02	0.03	0.617211	0.877556
Stearoylethanolamide	C20 H41 N O2	327.314		HMDB13078		7.95	0.923	-0.12	0.386293	0.7398
N-Undecanoylglycine	C13 H25 N O3	243.183		HMDB13286		10.805	0.202	-2.3	0.237609	0.639918
2-Arachidonyl Glycerol ether	C23 H40 O3	386.281		HMDB13657							6.732	1.212	0.28	0.376284	0.833929											3.24	1.216	0.28	0.288809	0.844505
2-pyridone	C5 H5 N O	95.0374	C02502	HMDB13751		7.102	0.98	-0.03	0.789254	0.927955						5.73	0.947	-0.08	0.883556	0.957041
Amphetamine	C9 H13 N	135.105	C07514	HMDB14328		17.627	0.827	-0.27	0.491413	0.801315
Desogestrel	C22 H30 O	310.229	C07629	HMDB14449							7.847	0.853	-0.23	0.625269	0.878198
trimethadione	C6 H9 N O3	143.058	D00392	HMDB14491		5.341	0.842	-0.25	0.236521	0.639918	0.971	1.118	0.16	0.461784	0.835549	6.364	1.119	0.16	0.875308	0.952965
entecavir	C12 H15 N5 O3	277.117	D04008	HMDB14585		4.505	0.767	-0.38	0.642903	0.868103
Albendazole	C12 H15 N3 O2 S	265.089	C01779	HMDB14659												8.358	0.913	-0.13	0.413669	0.738497
oxandrolone	C19 H30 O3	306.221	C07346	HMDB14759																											1.962	0.925	-0.11	0.46612	0.798908
Dextropropoxyphene	C22 H29 N O2	339.221	D07809	HMDB14785																						1.142	0.757	-0.4	0.464474	0.850729
Nitroglycerin	C3 H5 N3 O9	227.003	C07455	HMDB14865																											24.945	1.226	0.29	0.77502	0.921515
Marimastat	C15 H29 N3 O5	331.21	D03795	HMDB14924		4.959	1.678	0.75	0.193835	0.594473
Phenmetrazine	C11 H15 N O	177.115	C07432	HMDB14968							2.956	1.04	0.06	0.447586	0.833929
Chlorhexidine	C22 H30 Cl2 N10	504.203	C06902	HMDB15016							4.051	0.768	-0.38	0.411519	0.833929											4.93	1.099	0.14	0.882573	0.964911
3219	C5 H13 N	87.1049	C07785	HMDB15216																						5.678	1.09	0.12	0.495718	0.862045
Iloprost	C22 H32 O4	360.231	D02721	HMDB15220																	1.458	0.758	-0.4	0.282859	0.754185						2.879	0.722	-0.47	0.219275	0.770816
3475	C9 H18 S3	222.056	C00175	HMDB15252		9.941	1.303	0.38	0.325556	0.693043
Ciclopirox	C12 H17 N O2	207.126	D03488	HMDB15319							0.984	0.715	-0.48	0.25932	0.833929
zopiclone	C17 H17 Cl N6 O3	388.104	D01372	HMDB15329		9.263	0.926	-0.11	0.905537	0.959785
Aliskiren	C30 H53 N3 O6	551.394	D03208	HMDB15387							9.088	1.248	0.32	0.198864	0.833929											4.695	0.785	-0.35	0.304645	0.844505
hydralazine	C8 H8 N4	160.075	C07040	HMDB15400																											20.016	1.159	0.21	0.736454	0.901101
Oxprenolol	C15 H23 N O3	265.165	D08318	HMDB15520		7.096	1.271	0.35	0.115574	0.487511
Vorinostat	C14 H20 N2 O3	264.147	D06320	HMDB15568							3.485	0.821	-0.28	0.96052	0.984266
cyclandelate	C17 H24 O3	276.172	D00286	HMDB15586		9.134	0.606	-0.72	0.511454	0.80817	7.915	0.839	-0.25	0.769889	0.923577
Drotaverine	C24 H31 N O4	397.225	D07088	HMDB15669							9.252	1.105	0.14	0.185914	0.833929
carglumic acid	C6 H10 N2 O5	190.058	C05829	HMDB15673												6.813	1.333	0.42	0.477448	0.76478	6.762	14.525	3.86	0.118286	0.635098
L-Alanyl-L-glutamine	C8 H15 N3 O4	217.106		HMDB28685		0.965	0.898	-0.15	0.596507	0.850047
b-Ala-Lys	C9 H19 N3 O3	217.142		HMDB28692												11.489	2.774	1.47	0.170045	0.598631
asp-leu	C10 H18 N2 O5	246.121		HMDB28757		4.646	0.766	-0.38	0.237861	0.639918
Asp-Trp	C15 H17 N3 O5	319.117		HMDB28764		5.041	1.2	0.26	0.611225	0.853054
Asp-tyr	C13 H16 N2 O6	296.1		HMDB28765		4.742	1.637	0.71	0.60201	0.851794
Glu-Gly	C7 H12 N2 O5	204.074		HMDB28819		1.007	1.41	0.5	0.404746	0.752767
his-tyr	C15 H18 N4 O4	318.132		HMDB28897		5.328	1.266	0.34	0.816971	0.937097
Leu-Leu	C12 H24 N2 O3	244.178		HMDB28933		5.489	0.783	-0.35	0.261226	0.653367						4.475	1.122	0.17	0.785285	0.910873
Lysylvaline	C11 H23 N3 O3	245.173		HMDB28964		0.916	1.538	0.62	0.107442	0.4813
phe-asn	C13 H17 N3 O4	279.121		HMDB28990		4.824	1.252	0.32	0.833135	0.941604
phe-gln	C14 H19 N3 O4	293.137		HMDB28993		5.086	0.973	-0.04	0.444443	0.776737
ser-gln	C8 H15 N3 O5	233.101		HMDB29037		0.91	1.002	0	0.629064	0.863034
Tyrosylalanine	C12 H16 N2 O4	252.111		HMDB29098		4.587	0.924	-0.11	0.801453	0.931223																1.719	0.843	-0.25	0.59207	0.8853
Tyr-Phe	C18 H20 N2 O4	328.142		HMDB29112		5.513	1.245	0.32	0.861436	0.949337
Tyrosyltyrosine	C18 H20 N2 O5	344.137		HMDB29117		5.085	1.321	0.4	0.605844	0.852052
Val-Met	C10 H20 N2 O3 S	248.119		HMDB29133		4.819	1.046	0.07	0.88472	0.954123
2-(2-amino-3-methylbutanamido)-3-phenylpropanoic acid	C14 H20 N2 O3	264.147		HMDB29134		5.385	0.818	-0.29	0.21537	0.626553
Valylvaline	C10 H20 N2 O3	216.147		HMDB29140		4.577	0.846	-0.24	0.517089	0.810256
L-gamma-Glutamyl-L-leucine	C11 H20 N2 O5	260.137		HMDB29153		4.921	0.676	-0.56	0.254028	0.650631
4-Methoxyaniline	C7 H9 N O	123.068		HMDB29300		12.738	1.258	0.33	0.676362	0.878898
2-AMINO-3,4-DIMETHYLIMIDAZO(4,5-F)QUINOLINE	C12 H12 N4	212.105		HMDB29707		1.897	1.077	0.11	0.51628	0.810256
MEIQX	C11 H11 N5	213.101		HMDB29864							8.537	0.797	-0.33	0.316394	0.833929
(25S)-5beta-spirostan-3beta-yl beta-D-glucoside	C33 H54 O8	578.381		HMDB30046							7.777	0.878	-0.19	0.654953	0.885579
Methyl (2E)-3-[4-(sulfooxy)phenyl]acrylate	C10 H10 O6 S	258.02	C10129	HMDB30353		0.864	1.055	0.08	0.906754	0.960279
ARTOCARPIN	C26 H28 O6	436.187		HMDB30849		8.417	0.637	-0.65	0.883074	0.953235
11-Cyclohexylundecanoic acid	C17 H32 O2	268.24		HMDB30997																	1.453	0.673	-0.57	0.137254	0.651722						1.669	0.524	-0.93	0.293532	0.770816
2-Dodecylbenzenesulfonic acid	C18 H30 O3 S	326.193		HMDB31031		5.327	1.273	0.35	0.115678	0.487511
Valerophenone	C11 H14 O	162.104		HMDB31208		7.482	0.6	-0.74	0.270164	0.65985
Ethyl acetate	C4 H8 O2	88.0528	C00849	HMDB31217		1.639	1.038	0.05	0.590231	0.846387
Cyclopentanone	C5 H8 O	84.0576	C00557	HMDB31407		12.574	1.083	0.12	0.989584	0.995921
Dihydrojasmone	C11 H18 O	166.135		HMDB31565		7.223	1.121	0.16	0.687425	0.884485
Benzylideneacetone	C10 H10 O	146.073		HMDB31617		3.96	0.609	-0.71	0.427476	0.767681
Triethylamine	C6 H15 N	101.121	C14691	HMDB32539		1.063	0.81	-0.3	0.941262	0.974302	0.986	1.24	0.31	0.524644	0.846043											4.873	0.869	-0.2	0.35258	0.844505
11-Aminoundecanoic acid	C11 H23 N O2	201.172		HMDB32669												4.527	0.655	-0.61	0.120879	0.569939
2-Methoxynaphthalene	C11 H10 O	158.073		HMDB32861		7.249	1.018	0.03	0.756953	0.91483
DMPC	C36 H72 N O8 P	677.499		HMDB32872		10.455	1.242	0.31	0.593381	0.847454
Sulfurol	C6 H9 N O S	143.04		HMDB32985												1.496	0.864	-0.21	0.985587	0.993213
6-Methylquinoline	C10 H9 N	143.073		HMDB33115		5.167	0.88	-0.18	0.201008	0.604423
2'-deoxymugineic acid	C12 H20 N2 O7	304.126	C15485	HMDB33909		5.069	0.794	-0.33	0.373259	0.730964
Ethyl myristate	C16 H32 O2	256.241		HMDB34153																	1.447	1.361	0.44	0.992615	0.996758						1.716	1.248	0.32	0.823345	0.944142
(+/-)-Muscone	C16 H30 O	238.23		HMDB34181		13.164	1.092	0.13	0.790658	0.927977
Triethyl citrate	C12 H20 O7	276.121	D06228	HMDB34263		7.222	1.361	0.45	0.251	0.649396
Pseudopelletierine	C9 H15 N O	153.115	C10865	HMDB34580												3.941	1.356	0.44	0.578147	0.822266
Olomoucine	C15 H18 N6 O	298.154		HMDB35233		9.105	1.099	0.14	0.432464	0.770674
Solasodine	C27 H43 N O2	413.329	C10822	HMDB35282							5.833	1.244	0.32	0.391521	0.833929
Isopropyl palmitate	C19 H38 O2	298.288	D04632	HMDB35474																											1.638	0.928	-0.11	0.401356	0.7799
rishitin	C14 H22 O2	222.162	C09715	HMDB35593							5.834	1.181	0.24	0.769975	0.923577
ACPC	C4 H7 N O2	101.048	C01234	HMDB36458		0.937	0.788	-0.34	0.813581	0.936664	0.834	2.367	1.24	0.205892	0.833929	6.216	1.394	0.48	0.780282	0.908926
steviol	C20 H30 O3	318.219		HMDB36706		7.21	0.536	-0.9	0.392681	0.743411
Garcinol	C38 H50 O6	602.362	C09929	HMDB39154												7.101	0.547	-0.87	0.632533	0.842298
2-Hydroxytetracosanoic acid	C24 H48 O3	384.362		HMDB39540																											2.433	0.676	-0.56	0.241355	0.770816
2-Ethyl-4,5-dimethylthiazole	C7 H11 N O	125.084		HMDB40068		4.842	1.188	0.25	0.6035	0.851794
1,1,6-Trimethyl-1,2-dihydronaphthalene	C13 H16	172.125		HMDB40284		7.097	1.34	0.42	0.445656	0.776777
Tetraacetylethylenediamine	C10 H16 N2 O4	228.111		HMDB40573		1.066	1.167	0.22	0.465576	0.788422
Capsi-amide	C17 H35 N O	269.271	C17515	HMDB40940		10.46	1.276	0.35	0.337034	0.703605	5.936	0.898	-0.15	0.663603	0.887556
4253	C12 H22 O2	198.162	C01008	HMDB40987		6.89	1.382	0.47	0.172746	0.576932
Diisobutyl adipate	C14 H26 O4	258.183	C14260	HMDB41618		8.599	0.924	-0.11	0.605786	0.852052
Naphthalen-2-amine	C10 H9 N	143.073		HMDB41802		4.695	1.023	0.03	0.56156	0.832035						4.828	0.769	-0.38	0.361619	0.715004
S-3-oxodecanoyl cysteamine	C12 H23 N O2 S	245.145		HMDB59773		7.016	0.956	-0.06	0.893447	0.957156
ionene	C13 H18	174.141		HMDB59826		10.8	0.378	-1.4	0.290902	0.664633
Indane	C9 H10	118.078		HMDB59837		8.158	0.664	-0.59	0.167651	0.571686
cis-4-Hydroxy-D-proline	C5 H9 N O3	131.058	C03440	HMDB60460												6.332	0.97	-0.04	0.775821	0.907641
S-(Formylmethyl)glutathione	C12 H19 N3 O7 S	349.094	C14871	HMDB60507		4.635	0.447	-1.16	0.645291	0.868533
Norclozapine	C17 H17 Cl N4	312.114		HMDB60536		5.075	1.744	0.8	0.214895	0.626553
2140	C11 H14 O2	178.099				8.103	0.541	-0.89	0.00769238	0.156763
3420	C13 H18 O	190.136				7.093	1.563	0.64	0.0725078	0.407268
?17-6-keto Prostaglandin F1?	C20 H32 O6	350.209	C06429			6.284	2.31	1.21	0.379631	0.73518
(-)-Lupinine	C10 H19 N O	169.146	C10773													1.082	0.623	-0.68	0.675235	0.868635
(+)-Eudesmin	C22 H26 O6	386.173	C10561								5.955	1.654	0.73	0.0859616	0.833929											1.6	0.544	-0.88	0.421446	0.844505
(+)-halomon	C10 H15 Br2 Cl3	397.86				0.77	0.724	-0.47	0.313937	0.681452
(+/-)-pantetheine	C11 H22 N2 O4 S	278.13				5.332	0.944	-0.08	0.416218	0.76199
(+/-)-Tropinone	C8 H13 N O	139.099	C00783			2.091	0.576	-0.79	0.00598868	0.145331
(+/-)8-HEPE	C20 H30 O3	300.208	C12032								7.232	0.763	-0.39	0.599222	0.869581
(−)-trans-Methyl dihydrojasmonate	C13 H22 O3	226.156				5.053	0.86	-0.22	0.655549	0.872134
(1'S,2'S)-3',11'-dihydroxy-1',2',5'-trimethyl-8'-oxaspiro[oxirane-2,12'-tricyclo[7.2.1.0Â?,â·]dodecan]-5'-en-4'-one	C15 H20 O5	262.12	C15760								6.488	1.139	0.19	0.733568	0.910924
(10E,12Z)-10,12-Hexadecadienal	C16 H28 O	236.214									6.179	1.362	0.45	0.100495	0.833929
(14R)-3beta,5,6beta,10,16-pentahydroxygrayanotoxan-14-yl acetate	C22 H36 O7	412.246	C09103								5.779	1.603	0.68	0.0377666	0.833929	1.226	1.593	0.67	0.417688	0.740986
(17beta)-4-(Acetylsulfanyl)-3-oxoandrost-4-en-17-yl propionate	C24 H34 O4 S	418.22				7.069	0.841	-0.25	0.162507	0.568054
(1R,2R,3S,6S,7R,9S,10S,11S,13R,14R)-11-(1-Hydroxy-2-propanyl)-3,7,10-trimethyl-15-oxapentacyclo[7.5.1.0~1,6~.0~7,13~.0~10,14~]pentadecane-2,6,9,11,13,14-hexol	C20 H32 O8	400.209	C09657			8.264	0.676	-0.56	0.774353	0.920648
(1R,2S,3S,6R,7R,11R,14R,16S)-7-Isopropyl-2,6-dimethyl-19-oxa-17-azapentacyclo[14.2.1.0~2,14~.0~3,11~.0~6,10~]nonadec-9-en-8-one	C22 H33 N O2	343.251									7.667	0.609	-0.72	0.131726	0.833929
(1R,5S,6R,7R,9S,11S,12S,13S,14S)-3-Amino-14-methyl-8,10-dioxa-2,4-diazatetracyclo[7.3.1.1~7,11~.0~1,6~]tetradec-2-ene-5,9,12,13,14-pentol	C11 H17 N3 O7	303.107																			6.025	0.89	-0.17	0.0713776	0.606698
(1R,9S,12S,13R,14S,17R,18Z,21S,23S,24S,25S,27R)-17-Allyl-1,14,25-trihydroxy-12-{(1E)-1-[(1R,3R,4R)-4-hydroxy-3-methoxycyclohexyl]-1-propen-2-yl}-23-methoxy-13,19,21,27-tetramethyl-11,28-dioxa-4-azatri cyclo[22.3.1.0~4,9~]octacos-18-ene-2,3,10,16-tetrone	C43 H67 N O12	789.465				0.831	2.824	1.5	0.0558666	0.367954
(1S,2R,3S,4S,6R,7R,8R,14S)-3-Hydroxy-2,4,7,14-tetramethyl-9-oxo-4-vinyltricyclo[5.4.3.0~1,8~]tetradec-6-yl glycolate	C22 H34 O5	378.24				6.744	0.992	-0.01	0.644863	0.868407
(1S,3R,5E,7E,17xi,20S)-1,3-Dihydroxy-24-(1-piperidinyl)-9,10-secochola-5,7,10-trien-24-one	C29 H45 N O3	455.339									8.132	1.319	0.4	0.680534	0.889599
(1S,4aS)-1,4a-Dimethyl-1,2,3,4,4a,5,6,8a-octahydronaphthalene	C12 H20	164.156				2.328	0.697	-0.52	0.147734	0.547374
(1S)-1,5-Anhydro-1-(10-hydroxy-1,3,7-trioxo-2,3,7,8,9,12-hexahydro-1H-indolo[2,3-a]pyrrolo[3,4-c]carbazol-9-yl)-D-glucitol	C26 H21 N3 O9	519.13				2.408	0.369	-1.44	0.428383	0.768035
(2,7-Dimethyloctahydro-1H-cyclopenta[c]pyridin-4-yl)methanol	C11 H21 N O	183.162	C17385								5.25	1.034	0.05	0.75995	0.91774
(2E)-2-[2-(1,2,4a,5-tetramethyl-1,2,3,4,4a,7,8,8a-octahydronaphthalen-1-yl)ethyl]but-2-enedioic acid	C20 H30 O4	316.203														4.316	1.206	0.27	0.306204	0.682063
(2E)-2,5-Dichloro-4-oxo-2-hexenedioic acid	C6 H4 Cl2 O5	225.944				0.753	1.192	0.25	0.494757	0.801315
(2E)-3-(6,7-Dimethoxy-1,3-benzodioxol-5-yl)-2-propen-1-yl hydrogen sulfate	C12 H14 O8 S	318.042				0.875	0.956	-0.07	0.888992	0.954554
(2E)-3-Phenyl-2-propen-1-yl (2Z)-3-phenylacrylate	C18 H16 O2	264.114				4.822	0.493	-1.02	0.783111	0.924374
(2E)-3,7-Dimethyl-2,6-octadien-1-yl beta-D-glucopyranoside	C16 H28 O6	316.188				7.532	0.654	-0.61	0.238014	0.639918
(2R)-1-{[(2-Aminoethoxy)(hydroxy)phosphoryl]oxy}-3-hydroxy-2-propanyl (4Z,7Z,10Z,13Z,16Z)-4,7,10,13,16-docosapentaenoate	C27 H46 N O7 P	527.301				7.433	0.687	-0.54	0.27677	0.661518
(2R)-1-{[(2-Aminoethoxy)(hydroxy)phosphoryl]oxy}-3-hydroxy-2-propanyl (4Z,7Z,10Z,13Z,16Z)-4,7,10,13,16-docosapentaenoate_(1)	C27 H46 N O7 P	527.301				8.034	0.121	-3.05	0.155716	0.560449
(2R)-1-{[(2-Aminoethoxy)(hydroxy)phosphoryl]oxy}-3-hydroxy-2-propanyl (7Z,10Z,13Z,16Z)-7,10,13,16-docosatetraenoate	C27 H48 N O7 P	529.316				8.619	0.074	-3.76	0.00141399	0.0820535
(2R)-2-[(8Z,11Z,14Z)-8,11,14-Icosatrienoyloxy]-3-(pentadecanoyloxy)propyl 2-(trimethylammonio)ethyl phosphate	C43 H80 N O8 P	769.56				9.538	0.529	-0.92	0.265122	0.653984
[truncated: 905 more rows]

## Sheet: Table S3_Joint pathway analysis
Pathway name	Pathway impact score	Pathway p-value	# Proteins	# Metabolites	Statistically Significant Protein Gene IDs	Statistically Significant Compound KEGG IDs
[truncated: 8 more rows]
